# Supplementary material for: Machine-Learning-Based Proteomic Predictive Modeling with Thermally-Challenged Caribbean Reef Corals
Source: MDPI journal article supplement (doi:10.3390/d14010033), 2022-01-05
Supplement: s1 [file s1]

Archive with 2 entries (2 files):
- diversity-1426654-supplementary.pdf
- Mayfield-Diversity-OSDF.xlsx
