# Supplementary material for: Machine-Learning-Based Proteomic Predictive Modeling with Thermally-Challenged Caribbean Reef Corals
Source: MDPI journal article supplement (doi:10.3390/d14010033), 2022-01-05
Supplement: s1 [file s1 › Mayfield-Diversity-OSDF.xlsx]

## Sheet: dataset overview
File name	File type	Proprietary software needed?	Contents	Samples included		Table A1. Details of the 20 experimental iTRAQ samples. Please note that one sample (B5-7; iTRAQ batch A-label 114; a control coral sampled after five treatment days; denoted by*)
Mayfield Ofav iTRAQ manuscript	Word	Microsoft Word	manuscript describing dataset (under review)	all		spilled in the speed-vac during preparation and so was not analyzed. CHD=colony health designation: bleaching-susceptible (BLS), bleaching-resistant (BLR), or indeterminant (ID; not enough data to determine).
Mayfield Ofav iTRAQ OSM	Word	Microsoft Word	supplemental material accompanying aforementioned manuscript	all		FHD=fragment health designation: healthy control (HC; n=10), high-temperature-acclimating (HTA; n=5), sub-lethally stressed (SLS; n=3), or actively bleaching (AB; n=2). For the raw proteomic data, please see the “
C-A.RAW	RAW	yes: Thermo-Fisher Scientific's Proteome Discoverer	Raw iTRAQ data from mass spectrometer	see Table A1		host-batch A-C” and “endosymbiont-batch A-C” worksheets in the OSDF. NA=not applicable.
C-B.RAW	RAW	yes: Thermo-Fisher Scientific's Proteome Discoverer	Raw iTRAQ data from mass spectrometer	see Table A1		Sample name	Reef of origin	Shelf	Treatment (temp. x time)	Genotype	CHD lab	FHD lab	Protein loaded (µg)	iTRAQ tag	iTRAQ batch
C-C.RAW	RAW	yes: Thermo-Fisher Scientific's Proteome Discoverer	Raw iTRAQ data from mass spectrometer	see Table A1		Normalizer	mix of all	mix of both	mix of all	mix of all	NA	NA	22	113	A
C-A.mzml	MZML	no (open access)	Mass spectrometer peak file	see Table A1		B5-7*	Cheeca Rocks	inshore	30-5	lightyellow	BLR	HC	22	114	A
C-B.mzml	MZML	no (open access)	Mass spectrometer peak file	see Table A1		C5-1	Little Conch	offshore	30-5	black(a)	BLS	HC	22	115	A
C-C.mzml	MZML	no (open access)	Mass spectrometer peak file	see Table A1		B5-4	Cheeca Rocks	inshore	33-5	lightyellow	BLR	SLS	22	116	A
C-A-host.mzid	MZID	no (open access)	MZML queried against host coral conceptually translated proteome	see Table A1		A2-2	The Rocks	inshore	30-31	skyblue	BLS	HC	22	117	A
C-A-Sym.mzid	MZID	no (open access)	MZML queried against endosymbiont conceptually translated proteome	see Table A1		A4-5	The Rocks	inshore	32-31	skyblue	BLR	HTA	22	118	A
C-B-host.mzid	MZID	no (open access)	MZML queried against host coral conceptually translated proteome	see Table A1		B3-1	Cheeca Rocks	inshore	32-31	black(c)	BLR	HTA	22	119	A
C-B-Sym.mzid	MZID	no (open access)	MZML queried against endosymbiont conceptually translated proteome	see Table A1		C5-2	Little Conch	offshore	32-31	black(a)	BLS	AB	22	121	A
C-C-host.mzid	MZID	no (open access)	MZML queried against host coral conceptually translated proteome	see Table A1		Normalizer	mix of all	mix of both	mix of all	mix of all	NA	NA	22	113	B
C-C-Sym.mzid	MZID	no (open access)	MZML queried against endosymbiont conceptually translated proteome	see Table A1		A4-1	The Rocks	inshore	30-5	skyblue	BLR	HC	22	114	B
Orbicella faveolata conceptually translated proteome	fasta	no (open access)	protein sequences conceptually translated from host coral transcriptome	all		C2-2	Little Conch	offshore	30-5	black(b)	BLS	HC	22	115	B
Endosymbiont (in hospite with Ofav) proteome	fasta	no (open access)	protein sequences conceptually translated from endosymbiont transcriptome	all		D5-2	Cheeca Rocks	inshore	30-5	grey60	BLR	HC	22	116	B
Excel spreadsheet worksheet contents						D6-6	Cheeca Rocks	inshore	33-5	grey60	ID	SLS	22	117	B
Worksheet name	Worksheet contents					A4-8	The Rocks	inshore	30-31	skyblue	BLR	HC	22	118	B
dataset overview	overview of dataset					C5-7	Little Conch	offshore	30-31	black(a)	BLS	HC	22	119	B
sample info-B	overview of proteomic samples					D5-3	Cheeca Rocks	inshore	32-31	grey60	BLR	HTA	22	121	B
sample info-B & processed data	protein sample information and processed data (raw iTRAQ ratios and logs-transformed data)					Normalizer	mix of all	mix of both	mix of all	mix of all	NA	NA	22	113	C
host-batch A	host coral proteins identified in iTRAQ batch A (from "C-A-host.mzid" file)					A4-7	The Rocks	inshore	33-5	skyblue	BLR	HTA	22	114	C
host-batch A-sequences	detailed list of all host proteins (including sequences) identified in iTRAQ batch A (from "C-A-host.mzid" file)					C5-8	Little Conch	offshore	33-5	black(a)	BLS	AB	22	115	C
endosymbiont-batch A	endosymbiont proteins identified in iTRAQ batch A (from "C-A-Sym.mzid" file)					D5-5	Cheeca Rocks	inshore	33-5	grey60	BLR	HTA	22	116	C
endosymbiont-batch A-sequenxes	detailed list of all endosymbiont proteins (including sequences) identified in iTRAQ batch A (from "C-A-Sym.mzid" file)					B5-1	Cheeca Rocks	inshore	30-31	lightyellow	BLR	HC	22	117	C
host-batch B	host coral proteins identified in iTRAQ batch B (from "C-B-host.mzid" file)					D4-8	Cheeca Rocks	inshore	30-31	grey60	BLR	HC	22	118	C
host-batch B-sequences	detailed list of all host proteins (including sequences) identified in iTRAQ batch B (from "C-B-host.mzid" file)					D5-8	Cheeca Rocks	inshore	30-31	grey60	BLR	HC	22	119	C
endosymbiont-batch B	endosymbiont proteins identified in iTRAQ batch B (from "C-B-Sym.mzid" file)					B5-2	Cheeca Rocks	inshore	32-31	light yellow	BLR	SLS	22	121	C
endosymbiont-batch B-sequences	detailed list of all endosymbiont proteins (including sequences) identified in iTRAQ batch B (from "C-B-Sym.mzid" file)
host-batch C	host coral proteins identified in iTRAQ batch C (from "C-C-host.mzid" file)
host-batch C-sequences	detailed list of all host proteins (including sequences) identified in iTRAQ batch C (from "C-C-host.mzid" file)
endosymbiont-batch C	endosymbiont proteins identified in iTRAQ batch C (from "C-C-Sym.mzid" file)
endosymbiont-batch C-sequences	detailed list of all endosymbiont proteins (including sequences) identified in iTRAQ batch C (from "C-C-Sym.mzid" file)
Non-standard technical jargon found in worksheets and files
Top hit against transcriptome	The contig accession number against which the respective protein matched most closely.
mRNA sequence type	The completeness of the mRNA sequence associated with the top hit.
Protein name	The annotation ((UniProt) associated with the top transcriptome hit.
Protein FDR Confidence: Combined	This refers to whether the protein's identify could be verified with "high" confidence (p<0.01, calculated using a decoy database approach).
Description	Detailed annotation associated with the top hit transcriptome contig.
Exp. Q value Combined	This and the following terms are described here: https://pubmed.ncbi.nlm.nih.gov/18052118/. In short, q-values are		adjusted p-values found using an optimized FDR approach and are likely the better term (over p-values) for querying large mass spectrometry databsets.
Sum Pep Score	This is the percent chance that the software's guess about the protein ID was wrong.
Coverage (%)	The percentage of the protein that was sequenced.
# Peptides	The number of peptides sequenced that aligned to the accession number listed in the respective row.
# PSMs	PSM=peptide-spectrum match.
# unique peptides	The number of unique peptides that mapped to the protein associated with the accession number listed in the respective row.
# protein groups	I have never seen this value be anything but one.
# AAs	This is the number of amino acids (AA) in the entire protein. Please note that this is nearly always much higher than what was sequenced (which can be discerned from clicking on the "+" sign at the far left of each row).
MW [kDA]	The molecular weight (MW) of the hypothetical protein, in kilodaltons (kDa). Please note that this is the MW of the entire protein, not just the peptide(s) sequenced herein.
calc. PI	The isoelectric point (PI) calculated from the sequence of the entire protein (see protein linked to accession number.), not the peptide sequenced herein.
Score Sequest HT: Sequest HT	Sum of the scores of the peptides from the Sequest HT search. This was not the preferred algorithm herein, and these data were not considered in the manuscript.
# Peptides (by Search Engine): Sequest HT	The number of distinct peptide sequences in a protein group from the Sequest HT search. As mentioned above, I did not generally rely on the Sequest algorithm herein.

## Sheet: sample info-A
sample	colony code	genotype x colony code	genotype	site	shelf	temperature	temperature-control vs. high	day	temperature (1, 2, 3)	temp. x time	stressed at sampling time?	iTRAQ label	iTRAQ batch
C5-1	C5	C	black(a)	Little Conch	offshore	30	control	5	1	30-5	no	115/113	A
B5-4	B5	B	light yellow	Cheeca	inshore	33	high	5	3	33-5	no	116/113	A
A2-2	A2	A	skyblue	Rocks	inshore	30	control	31	1	30-31	no	117/113	A
A4-5	A4	A	skyblue	Rocks	inshore	32	high	31	2	32-31	yes	118/113	A
B3-1	B3	B	black(c)	Cheeca	inshore	32	high	31	2	32-31	yes	119/113	A
C5-2	C5	C	black(a)	Little Conch	offshore	32	high	31	2	32-31	yes	121/113	A
A4-1	A4	A	skyblue	Rocks	inshore	30	control	5	1	30-5	no	114/113	B
C2-2	C2	C	black(b)	Little Conch	offshore	30	control	5	1	30-5	no	115/113	B
D5-2	D5	D	grey60	Cheeca	inshore	30	control	5	1	30-5	no	116/113	B
D6-6	D6	D	grey60	Cheeca	inshore	33	high	5	3	33-5	no	117/113	B
A4-8	A4	A	skyblue	Rocks	inshore	30	control	31	1	30-31	no	118/113	B
C5-7	C5	C	black(a)	Little Conch	offshore	30	control	31	1	30-31	no	119/113	B
D5-3	D5	D	grey60	Cheeca	inshore	32	high	31	2	32-31	yes	121/113	B
A4-7	A4	A	skyblue	Rocks	inshore	33	high	5	3	33-5	no	114/113	C
C5-8	C5	C	black(a)	Little Conch	offshore	33	high	5	3	33-5	yes	115/113	C
D5-5	D5	D	grey60	Cheeca	inshore	33	high	5	3	33-5	no	116/113	C
B5-1	B5	B	light yellow	Cheeca	inshore	30	control	31	1	30-31	no	117/113	C
D4-8	D4	D	grey60	Cheeca	inshore	30	control	31	1	30-31	no	118/113	C
D5-8	D5	D	grey60	Cheeca	inshore	30	control	31	1	30-31	no	119/113	C
B5-2	B5	B	light yellow	Cheeca	inshore	32	high	31	2	32-31	no	121/113	C

## Sheet: sample info-B & processed data
	FHD=fragment health designation				CHD=colony health designation	model validation columns					experimental+environmental data										log2-transformed data
sample	FHD(4)	FHD(3)	stressed?	FHD: stressed?	CHD	Validation	Validation 2	Validation 3	Validation 4	Validation 5	site	shelf	temperature	temperature-control vs. high	treatment (temp. x time)	genotype	colony code	Symbiodiniaceae assemblage	genotype x colony code	day	OFAVBQ_DN190522_c0_g2_i1 2	OFAVBQ_DN197447_c0_g1_i1	OFAVBQ_DN200173_c1_g1_i3 2	OFAVBQ_DN207472_c1_g1_i1 2	OFAVBQ_DN208218_c2_g1_i13 2	OFAVBQ_DN208635_c1_g2_i15 2	OFAVBQ_DN217378_c2_g1_i3 2	OFAVBQ_DN217768_c1_g1_i5 2	OFAVBQ_DN218151_c4_g1_i1 2	OFAVBQ_DN218976_c2_g3_i2 2	OFAVBQ_DN219538_c0_g1_i8 2	OFAVBQ_DN220419_c0_g1_i1 2	OFAVBQ_DN220422_c1_g2_i1 2	OFAVBQ_DN221955_c1_g1_i6 2	OFAVBQ_DN222105_c0_g1_i1 2	OFAVBQ_DN222214_c0_g2_i2 2	OFAVBQ_DN222422_c2_g1_i4 2	OFAVBQ_DN222591_c0_g1_i4 2	OFAVBQ_DN223327_c1_g3_i5 2	OFAVBQ_DN223381_c0_g1_i7 2	OFAVBQ_DN223482_c3_g2_i3 2	OFAVBQ_DN223562_c2_g1_i4 2	OFAVBQ_DN223611_c1_g1_i7 2	OFAVBQ_DN223630_c2_g1_i3 2	OFAVBQ_DN223651_c2_g2_i5 2	OFAVBQ_DN223859_c0_g3_i6 2	OFAVBQ_DN224050_c2_g4_i1 2	OFAVBQ_DN224213_c1_g2_i4 2	OFAVBQ_DN224470_c0_g1_i6 2
C5-1	HC	HC	no	no	BLS	Training	Training	Training	Training	Training	Little Conch	offshore	30	control	30-5	black(a)	C5	mostly Breviolum	C	5	0.137504	-0.132894	-0.187707	0.422233	0.0426443	0.727703	-0.516636	-0.657445	0.0786098	0.703101	0.793272	0.304511	-0.192645	0.0976108	-2.25843	0.282143	-0.184425	-2.4112	-1.92687	0.668119	-0.318326	0.207893	-0.195946	1.14405	-1.35476	0.312665	0.467801	-0.046921	0.583038
B5-4	SLS	SLS	yes	no	BLR	Training	Training	Training	Training	Training	Cheeca Rocks	inshore	33	high	33-5	lightyellow	B5	mostly Breviolum	B	5	-0.428566	0.789103	-0.625934	0.503858	0.895303	0.442545	-0.715486	-0.013043	0.120352	-0.288065	-0.0232698	-0.189351	0.0186342	-0.100051	1.52457	-0.0439433	-0.265345	-1.22769	-1.85726	0.0894982	-0.00723157	0.263034	-0.0335695	1.08474	-1.4112	-0.0247367	-0.0174171	0.367371	-0.320126
A2-2	HC	HC	no	no	BLS	Training	Test	Training	Training	Training	The Rocks	inshore	30	control	30-31	skyblue	A2	mostly Durusdinium	A	31	-0.53952	-0.951764	1.39835	0.553852	0.16221	0.541019	1.06143	0.827006	0.423309	-0.888969	0.471968	0.396159	0.559737	0.158337	-0.818579	-0.304006	-0.202572	-3.60823	-1.61264	0.557778	-0.401635	0.524064	-0.131313	-0.500218	-0.606035	-0.106249	0.448901	-0.00144342	0.379621
A4-5	HTA	HC	no	acclimating	BLR	Validation	Training	Training	Training	Training	The Rocks	inshore	32	high	32-31	skyblue	A4	mostly Durusdinium	A	31	0.175045	-2.04692	-0.634867	0.696884	1.18078	1.14012	-0.0174171	-0.606035	0.909965	-0.136062	-0.785875	0.0370307	0.742437	0.642471	-1.87303	-0.0218044	-1.23447	-2.191	-1.20423	0.771463	-0.384584	0.815575	-0.841663	1.26604	-1.64386	0.766383	0.769772	0.801573	-0.28279
B3-1	HTA	SLS	yes	acclimating	BLR	Training	Training	Training	Validation	Validation	Cheeca Rocks	inshore	32	high	32-31	black(c)	B3	mostly Breviolum	B	31	-0.347399	-1.37707	-0.272297	0.653519	0.488515	0.989866	0.194087	-0.741783	-0.32916	0.0257376	-0.713119	0.370722	0.653519	0.565597	-0.575615	-0.15682	-0.00578235	0.210389	-1.29336	0.570463	0.0496308	0.540027	-0.0174171	0.199123	-1.22095	-0.148801	0.641546	-0.172994	-0.027675
C5-2	AB	AB	yes	yes	BLS	Validation	Training	Training	Training	Training	Little Conch	offshore	32	high	32-31	black(a)	C5	mostly Durusdinium	C	31	0.0214797	-1.84684	-0.579922	0.0538064	0.889863	1.419	-1.11092	-0.446148	0.319618	-0.362158	-0.107803	0.196607	1.6332	0.847195	-2.17788	0.0071955	-0.657445	-3.17137	-1.9771	1.00432	-0.614845	0.980391	-0.492079	-0.0816138	-1.16488	-1.17788	1.10367	0.60027	-0.195946
A4-1	HC	HC	no	no	BLR	Training	Validation	Training	Validation	Training	The Rocks	inshore	30	control	30-5	skyblue	A4	mostly Durusdinium	A	5	1.36849	-1.76121	1.07519	0.491597	0.629473	-0.687335	0.518031	-0.258425	-0.109359	0.0758749	0.0935602	-0.469929	0.166073	0.657183	0.0662614	-0.0679388	-0.354759	0.479231	1.15575	0.855192	-0.434403	0.360645	-0.390245	-0.077041	0.194087	-0.680382	-0.202572	0.952334	0.386259
C2-2	HC	HC	no	no	BLS	Training	Training	Training	Training	Training	Little Conch	offshore	30	control	30-5	black(b)	C2	mostly Breviolum	C	5	0.280956	-1.85726	0.0384362	0.471968	-0.382702	-0.413115	-0.274041	-0.454032	0.311503	-0.0365259	0.797428	-0.691989	-0.147202	-0.134477	-0.210897	-0.0380063	-0.720232	-0.295128	0.0257376	-0.125006	-0.272297	0.584	-0.163268	0.317304	-0.0679388	-1.12029	-0.547932	-0.112475	0.105678
D5-2	HC	HC	no	no	BLR	Training	Training	Validation	Training	Training	Cheeca Rocks	inshore	30	control	30-5	grey60	D5	mostly Breviolum	D	5	-0.253257	0.751892	-0.321928	-0.232769	-0.349235	-0.263612	0.43189	0.129613	0.204141	-0.140826	0.571434	-0.378944	0.138814	0.137504	0.410341	-0.00433459	-0.481969	0.0867838	-0.253257	-0.176251	0.145351	0.297485	-0.248108	0.249749	0.111031	-0.529073	-0.289827	-0.112475	-0.826233
D6-6	SLS	SLS	yes	no	ID	Validation	Validation	Training	Training	Training	Cheeca Rocks	inshore	33	high	33-5	grey60	D6	mix of Breviolum & Durusdinium	D	5	-0.210897	-0.573467	-0.788365	-0.239566	-0.171368	-0.365871	0.841571	-0.320126	0.0593553	-0.195946	0.569491	-0.21927	0.0538064	0.348232	0.447844	-0.112475	0.207893	-0.101598	0.350497	0.560715	-0.327348	0.24245	-0.309359	0.0229004	-0.222633	-0.253257	-0.488026	0.567545	-0.0954196
A4-8	HC	HC	no	no	BLR	Training	Training	Training	Training	Training	The Rocks	inshore	30	control	30-31	skyblue	A4	mostly Durusdinium	A	31	0.624803	-1.79586	0.695103	0.536053	0.0676387	-0.617056	0.463622	-0.492079	0.267835	0.119024	0.0786098	-0.318326	0.9115	0.772308	-0.166503	-0.186065	-0.531156	0.511974	0.515006	0.994218	-0.411195	0.397255	-0.62371	0.596458	-0.192645	0.467801	-0.300448	1.09288	0.0172093
C5-7	HC	HC	no	no	BLS	Training	Training	Validation	Test	Training	Little Conch	offshore	30	control	30-31	black(a)	C5	mostly Breviolum	C	31	0.476122	-1.56918	-0.0724828	0.0690147	0.35727	-0.0513992	-0.305788	-0.312939	0.138814	0.107018	0.342555	-0.112475	0.324235	0.833497	-0.145605	0.117695	-1.25154	0.296311	0.197865	1.04754	-0.0619024	0.140124	-0.584241	0.606916	0.0356239	-0.434403	0.0496308	1.21226	-0.0247367
D5-3	HTA	HC	no	acclimating	BLR	Training	Training	Validation	Validation	Validation	Cheeca Rocks	inshore	32	high	32-31	grey60	D5	mostly Durusdinium	D	31	0.719841	-1.67577	0.467801	0.249749	-0.288065	-0.00868224	0.635987	-0.382702	0.432959	0.0186342	0.546956	-0.336428	0.358396	0.329985	-0.341903	0.356144	-0.0320936	0.368489	0.488515	0.466758	-0.00288828	0.100305	-0.300448	-0.0174171	0.109695	-0.0985055	0.0758749	0.597412	0.486457
A4-7	HTA	HC	no	acclimating	BLR	Training	Test	Training	Test	Validation	The Rocks	inshore	33	high	33-5	skyblue	A4	mostly Durusdinium	A	5	-0.246395	-1.55216	-0.756331	-0.448115	0.24245	-0.110916	0.212881	0.672652	0.757023	-1.03209	-0.0588937	-0.289827	0	0.015783	1.42223	0.181421	-0.465938	0.259423	-0.625934	-0.110916	0.286881	-0.086201	-0.182786	0.473008	0.185232	0.484396	0.195348	-0.0573917	0.46048
C5-8	AB	AB	yes	yes	BLS	Training	Validation	Validation	Validation	Validation	Little Conch	offshore	33	high	33-5	black(a)	C5	mix of Breviolum & Durusdinium	C	5	0.254594	0.426533	-0.436354	-0.12658	-0.184425	-0.12658	-0.641604	-0.41889	0.411426	1.02574	-0.318326	0.289244	0.0342157	1.43029	-0.988504	-0.011588	-0.891643	-0.0816138	-0.678072	1.42169	-0.343732	-0.279284	-0.459973	0.407081	0.077243	0.340277	-0.118727	0.183963	0.461529
D5-5	HTA	HC	no	acclimating	BLR	Training	Validation	Training	Training	Training	Cheeca Rocks	inshore	33	high	33-5	grey60	D5	mostly Breviolum	D	5	0.0840643	-1.25154	-0.293359	-0.104697	0.175045	-0.0603973	0.238787	-0.332789	0.403813	0.121679	-0.0394883	0.077243	0.147958	1.05797	-1.34008	0.00575927	-0.345564	0.452068	-0.311148	0.945608	0.14274	0.250962	-0.215915	0.275007	0.102994	-0.37707	-0.00868224	-0.347399	0.0894982
B5-1	HC	HC	no	no	BLR	Validation	Training	Training	Training	Validation	Cheeca Rocks	inshore	30	control	30-31	lightyellow	B5	mostly Breviolum	B	31	0.140124	-1.58641	-0.325539	0.616358	0.24245	0.635987	-0.621488	-0.125006	-0.158429	-0.318326	0.186501	0.494672	0.0271541	1.61636	-1.26188	0.436162	-0.227692	-0.2567	-0.21927	1.47716	-0.0679388	0.728574	-0.307573	0.121679	0.289244	0.516015	-0.756331	-0.354759	-0.204233
D4-8	HC	HC	no	no	BLR	Validation	Training	Training	Training	Training	Cheeca Rocks	inshore	30	control	30-31	grey60	D4	mostly Durusdinium	D	31	-0.358454	-1.59074	0.295135	0.181421	0.0894982	0.293959	0.445727	0.0384362	-0.254978	-0.940645	0.697774	0.0538064	-0.0908029	-0.0144996	0.258217	-0.129734	0.326537	0.0229004	0.288063	-0.21424	-0.184425	0.445727	-0.0709665	0.273814	-0.0380063	-0.828793	-0.392137	-0.137648	-0.202572
D5-8	HC	HC	no	no	BLR	Training	Training	Training	Training	Training	Cheeca Rocks	inshore	30	control	30-31	grey60	D5	mix of Breviolum & Durusdinium	D	31	0.151859	-0.562772	0.0496308	-0.027675	-0.0785637	0.206643	0.24123	-0.199255	0.215368	0.306846	0.0894982	0.187768	0.0271541	1.14209	-1.23447	0.187768	-0.481969	0.297485	-0.307573	1.04614	-0.110916	0.176323	-0.351074	0.0867838	0.0717627	0.00288251	-0.0262051	-0.293359	-0.537424
B5-2	SLS	SLS	yes	no	BLR	Training	Test	Validation	Training	Training	Cheeca Rocks	inshore	32	high	32-31	lightyellow	B5	mostly Breviolum	B	31	-0.139236	-1.41504	-0.132894	0.0243197	0.259423	0.461529	0.0342157	0.168642	0.0813396	0.125651	-0.227692	-0.673463	-0.139236	0.621056	-0.971431	0.221568	-0.145605	0.27858	-0.263612	0.518031	0.329985	0.00432161	0.195348	0.366252	-0.0603973	-0.426625	0.352759	-0.360305	0.613532
	HC=healthy control				BLR=bleaching-resistant
	SLS=sub-lethally stressed				BLS=bleaching-susceptible
	AB=actively bleaching				ID=indeterminant
	HTA=high-temperature-acclimating
[truncated: 171 more columns]

## Sheet: host-batch A
Top hit against transcriptome	mRNA sequence type	Protein name	Protein FDR Confidence: Combined	Description	Exp. q-value: Combined	Sum PEP Score	Coverage [%]	# Peptides	# PSMs	# Unique Peptides	# Protein Groups	# AAs	MW [kDa]	calc. pI	Score Sequest HT: Sequest HT	# Peptides (by Search Engine): Sequest HT	Abundance Ratio: B5-7	Abundance Ratio: C5-1	Abundance Ratio: B5-4	Abundance Ratio: A2-2	Abundance Ratio: A4-5	Abundance Ratio: B3-1	Abundance Ratio: C5-2	Abundances (Grouped): normalizer-A	Abundances (Grouped): B5-7	Abundances (Grouped): C5-1	Abundances (Grouped): B5-4	Abundances (Grouped): A2-2	Abundances (Grouped): A4-5	Abundances (Grouped): B3-1	Abundances (Grouped): C5-2	Found in Sample: normalizer-A	Found in Sample: B5-7	Found in Sample: C5-1	Found in Sample: B5-4	Found in Sample: A2-2	Found in Sample: A4-5	Found in Sample: B3-1	Found in Sample: C5-2
OFAVBQ_DN222422_c2_g1_i4.p1	type:complete	(-),score=30.15,ACTP5_ACTEQ	High	53.266 9.63e-65,Anemone_cytotox|PF06369.12|2e-66 OFAVBQ_DN222422_c2_g1_i4:186-1007(-)	0	9.755	18	4	20	4	1	273	29.9	5.1	106.55	4	1.072	0.88	0.832	0.869	0.425	0.996	0.634	119.3	127.8	105	99.2	103.7	50.7	118.8	75.6	High	High	High	High	High	High	High	High
OFAVBQ_DN198533_c5_g2_i2.p1	type:complete	(-),score=65.53,ACTA_PHYPO	High	88.379 0.0,Actin|PF00022.19|9.4e-130,GerD|PF17898.1|0.45,GerD|PF17898.1|3.9e+03 OFAVBQ_DN198533_c5_g2_i2:23-907(-)	0	2.927	12	2	4	1	1	294	33.3	5.31	14.25	2	1.36	1.027	0.538	1.01	0.675	0.571	0.701	116.2	158.1	119.4	62.6	117.4	78.5	66.3	81.5	High	High	High	High	High	High	High	High
OFAVBQ_DN207472_c1_g1_i1.p1	type:complete	(-),score=20.88,H2A_ACRFO	High	97.561 1.29e-82,Histone_H2A_C|PF16211.5|1.5e-20,Histone|PF00125.24|1.9e-16,CBFD_NFYB_HMF|PF00808.23|8.5e-05,HbrB|PF08539.11|0.22 OFAVBQ_DN207472_c1_g1_i1:767-1171(-)	0	2.926	27	2	4	2	1	134	14.4	10.49	21.22	2	1.61	1.34	1.418	1.468	1.621	1.573	1.038	72.3	116.4	96.9	102.5	106.1	117.2	113.7	75	High	High	High	High	High	High	High	High
OFAVBQ_DN217768_c1_g1_i5.p1	type:complete	(-),score=63.84,ACTC_PISOC	High	98.419 0.0,Actin|PF00022.19|3.7e-100 OFAVBQ_DN217768_c1_g1_i5:829-1590(-)	0	1.951	7	2	3	1	1	253	28.2	5.34	5.09	2	1.513	0.634	0.991	1.774	0.657	0.598	0.734	101.2	153.2	64.1	100.4	179.7	66.5	60.5	74.3	Medium	Medium	Medium	Medium	Medium	Medium	Medium	Medium
OFAVBQ_DN218202_c5_g1_i1.p1	type:complete	(-),score=73.32,TBB_PARLI	High	98.210 0.0,Tubulin|PF00091.25|2.6e-69,Tubulin_C|PF03953.17|5.5e-43,Misat_Tub_SegII|PF10644.9|3.6e-05,Tubulin_3|PF14881.6|0.014,Tubulin_2|PF13809.6|0.023,Tubulin_2|PF13809.6|4.9e+03 OFAVBQ_DN218202_c5_g1_i1:86-1429(-)	0	1.394	5	2	2	2	1	447	50	4.86	3.81	2	1.087	1.1	0.944	0.967	0.741	0.798	1.537	97.9	106.4	107.7	92.4	94.7	72.5	78.1	150.4	High	High	High	High	High	High	High	High
OFAVBQ_DN223561_c1_g1_i3.p1	type:complete	(-),score=58.46,MDHC_HUMAN	High	70.782 7.99e-127,Ldh_1_C|PF02866.18|1.4e+03,Ldh_1_C|PF02866.18|4.4e-37,Ldh_1_N|PF00056.23|9.4e-16,Ldh_1_N|PF00056.23|1.2e+04,Ldh_1_N|PF00056.23|4.5e+03,ALP_N|PF17989.1|1.4e+03,ALP_N|PF17989.1|0.95 OFAVBQ_DN223561_c1_g1_i3:2398-3129(-)	0	0.976	3	1	2	1	1	243	26.7	8.51	4.14	1	1.101	0.38	0.711	0.523	0.354	0.35	0.46	164	180.6	62.3	116.6	85.7	58	57.4	75.4	High	High	High	High	High	High	High	High
OFAVBQ_DN225160_c1_g1_i4.p1	type:complete	(-),score=256.61,CHS5_YEAST	High	42.342 2.24e-07 OFAVBQ_DN225160_c1_g1_i4:1106-3997(-)	0	0.976	4	3	9	3	1	963	101.8	4.67	5.28	3	0.79	0.773	0.696	0.704	0.658	0.671	0.717	133.1	105.1	102.9	92.7	93.7	87.6	89.4	95.5	Low	Low	Medium	Medium	Medium	Medium	Medium	Medium
OFAVBQ_DN199373_c9_g4_i2.p1	type:5prime_partial	(-),score=18.92,H33_XENTR	High	100.000 6.77e-95,Histone|PF00125.24|1.8e-53,CENP-T_C|PF15511.6|3.6e+03,CENP-T_C|PF15511.6|0.00028,PAF|PF15715.5|0.00027,CENP-S|PF15630.6|0.00069,Glutaredoxin2_C|PF04399.13|0.72,Glutaredoxin2_C|PF04399.13|1.3e+02,CBFD_NFYB_HMF|PF00808.23|0.17 OFAVBQ_DN199373_c9_g4_i2:540-1043(-)	0	0.976	16	3	6	1	1	167	19	11.44	7.2	3	1.145	1.153	0.911	1.447	0.707	0.679	0.612	104.5	119.7	120.5	95.2	151.2	73.9	71	64	Low	Low	Low	Low	Low	Low	Low	Low
OFAVBQ_DN219881_c2_g1_i5.p1	type:complete	(-),score=19.03,PRDX1_CHICK	High	78.788 1.48e-53,1-cysPrx_C|PF10417.9|3.9e-14,AhpC-TSA|PF00578.21|1.7e-09,Redoxin|PF08534.10|8.4e-05 OFAVBQ_DN219881_c2_g1_i5:695-994(-)	0	0.976	7	1	3	1	1	99	11	5.48	4.72	1	1.117	0.625	0.76	0.811	0.539	0.6	0.483	134.8	150.5	84.3	102.5	109.3	72.6	80.9	65.1	High	High	High	High	High	High	High	High
OFAVBQ_DN211796_c0_g8_i2.p1	type:complete	(-),score=52.65,CTHR1_HUMAN	High	45.161 1.06e-49,Collagen|PF01391.18|2.3e-07,Collagen|PF01391.18|3.3e-09 OFAVBQ_DN211796_c0_g8_i2:21-821(-)	0	0.976	4	1	12	1	1	266	27.9	7.88	23.77	1																High	High	High	High	High	High	High	High
OFAVBQ_DN217050_c0_g1_i3.p1	type:complete	(-),score=195.01,SCN2A_HUMAN	High	40.244 0.0,SCN2A_HUMAN|30.841|4.69e-17,SCN2A_HUMAN|29.680|5.32e-17,SCN2A_HUMAN|23.077|3.90e-12,SCN2A_HUMAN|25.862|8.10e-09,Ion_trans|PF00520.31|8.8e-19,Ion_trans|PF00520.31|7.8e-64,Ion_trans|PF00520.31|9.9e-56,PKD_channel|PF08016.12|0.93,PKD_channel|PF08016.12|0.13,PKD_channel|PF08016.12|3,PKD_channel|PF08016.12|5.9,PKD_channel|PF08016.12|0.071,PKD_channel|PF08016.12|2.3e-09,GPHH|PF16905.5|1.5e-0…	0	0.976	1	3	7	3	1	1220	139.2	6.49	0	3	0.601	0.732	0.3	0.257	0.352	0.407	0.275	203.9	122.5	149.2	61.1	52.5	71.7	83.1	56.1	Medium	Medium	Medium	Medium	Medium	Medium	Medium	Medium
OFAVBQ_DN214183_c0_g2_i1.p1	type:complete	(-),score=10.34,GXN_ACRMI	High	36.577 1.23e-38,IGFL|PF14653.6|1.2e+04,IGFL|PF14653.6|0.0032,IGFL|PF14653.6|1.2e+02,IGFL|PF14653.6|30,IGFL|PF14653.6|60,IGFL|PF14653.6|0.37,IGFL|PF14653.6|78 OFAVBQ_DN214183_c0_g2_i1:1268-2221(-)	0	0.976	3	1	3	1	1	317	34.2	7.03	1.98	1	1.857	1.034	1.354	1.014	1.003	1.428	0.879	83.6	155.3	86.4	113.2	84.8	83.8	119.4	73.5	High	High	High	High	High	High	High	High
OFAVBQ_DN203451_c3_g1_i2.p1	type:3prime_partial	(-),score=39.44,ACT2_SCHMA	High	83.602 0.0,Actin|PF00022.19|1.1e-139 OFAVBQ_DN203451_c3_g1_i2:3-1124(-)	0	0.976	4	2	3	1	1	374	41.6	5.5	1.63	2	0.613	0.245	2.688	0.495	0.29	0.529	0.234	131.3	80.5	32.2	352.9	64.9	38.1	69.5	30.7	Low	Low	Low	Low	Low	Low	Low	Low
OFAVBQ_DN217467_c0_g1_i3.p1	type:complete	(-),score=52.68,RS4_ICTPU	High	75.510 1.21e-140,Ribosomal_S4e|PF00900.20|6.9e+03,Ribosomal_S4e|PF00900.20|7.8e-34,Ribosomal_S4e|PF00900.20|2e+03,40S_S4_C|PF16121.5|2.2e-25,S4|PF01479.25|3.1e-07,RS4NT|PF08071.12|5.3e-07,KOW|PF00467.29|5.2e+03,KOW|PF00467.29|2.6e-05 OFAVBQ_DN217467_c0_g1_i3:359-1102(-)	0	0.976	3	1	1	1	1	247	27.8	10.15	0	1	1.416	0.958	1.185	1.263	0.647	0.572	0.483	106.3	150.6	101.9	126	134.3	68.8	60.8	51.3	Medium	Medium	Medium	Medium	Medium	Medium	Medium	Medium
OFAVBQ_DN216794_c2_g3_i2.p1			High	OFAVBQ_DN216794_c2_g3~~OFAVBQ_DN216794_c2_g3_i2.p1 ORF type:complete len:156 (-),score=6.49 OFAVBQ_DN216794_c2_g3_i2:1567-2034(-)	0	0.976	10	2	6	2	1	155	17.6	7.53	0	2	0.83	0.155	0.9	0.321	0.337	1.062	0.116	169.4	140.7	26.3	152.5	54.3	57.1	179.9	19.7	Medium	Medium	Medium	Medium	Medium	Medium	Medium	Medium
OFAVBQ_DN166376_c0_g1_i1.p1	type:complete	(-),score=144.74,BIP_CHICK	High	85.514 0.0,HSP70|PF00012.20|3.9e-269,MreB_Mbl|PF06723.13|15,MreB_Mbl|PF06723.13|2.4e-16,DUF4624|PF15417.6|0.083,DUF4624|PF15417.6|1e+02,Hydantoinase_A|PF01968.18|2.2e+02,Hydantoinase_A|PF01968.18|7.7e+02,Hydantoinase_A|PF01968.18|0.035,FtsA|PF14450.6|1.5,FtsA|PF14450.6|0.7,FtsA|PF14450.6|5.8e+03,FGGY_C|PF02782.16|0.011,DDR|PF08841.10|0.2,DUF1464|PF07318.12|13,DUF1464|PF07318.12|5.5 OFAVBQ_DN16637…	0	0.976	1	1	2	1	1	660	72.4	5.33	2.82	1	1.593	0.91	0.894	0.929	0.667	0.634	0.702	109.1	173.9	99.4	97.6	101.4	72.8	69.2	76.6	High	High	High	High	High	High	High	High
OFAVBQ_DN220150_c3_g1_i6.p1	type:complete	(-),score=175.85,CEP63_DANRE	High	29.863 1.06e-61,CEP63|PF17045.5|1.2e-57,CEP63|PF17045.5|3.8e+02,Tup_N|PF08581.10|9.5e-05,Tup_N|PF08581.10|1.1e+03,Tup_N|PF08581.10|2.6e+03,Tup_N|PF08581.10|1.4e+02,Tup_N|PF08581.10|3.4e+03,Tup_N|PF08581.10|3.2e+03,Tup_N|PF08581.10|2e+03,Tup_N|PF08581.10|6.4e+02,Tup_N|PF08581.10|1.4e+04,Fez1|PF06818.15|0.87,Fez1|PF06818.15|7,Fez1|PF06818.15|28,Fez1|PF06818.15|0.019,Fez1|PF06818.15|3.8,DUF4201|PF13…	0	0.976	2	2	3	2	1	726	84.4	5.48	0	2																Medium	Medium	Medium	Medium	Medium	Medium	Medium	Medium
OFAVBQ_DN214866_c0_g2_i2.p1	type:complete	(-),score=101.72,ATG13_DANRE	High	36.170 2.70e-81,ATG13|PF10033.9|5.7e-06,ATG13|PF10033.9|5.2e-06,HA1|PF18239.1|0.28 OFAVBQ_DN214866_c0_g2_i2:957-2408(-)	0	0.976	7	2	3	2	1	483	53.1	7.11	0	2																High	Not Found	High	High	High	High	High	High
OFAVBQ_DN221579_c1_g1_i6.p1	type:complete	(-),score=138.70,PDIA4_BOVIN	High	54.717 0.0,PDIA4_BOVIN|51.456|1.48e-28,PDIA4_BOVIN|36.449|6.25e-10,Thioredoxin|PF00085.20|4.9e-10,Thioredoxin|PF00085.20|1.8e-31,Thioredoxin|PF00085.20|3.5e-24,Thioredoxin_6|PF13848.6|4.7,Thioredoxin_6|PF13848.6|0.26,Thioredoxin_6|PF13848.6|1.4e-22,Thioredoxin_6|PF13848.6|95,Thioredoxin_8|PF13905.6|24,Thioredoxin_8|PF13905.6|0.4,Thioredoxin_8|PF13905.6|6.9,Thioredoxin_8|PF13905.6|0.058,Thioredoxi…	0	0.976	6	3	8	3	1	538	61.7	5.33	0	3																Medium	Low	Medium	Medium	Medium	Medium	Medium	Medium
OFAVBQ_DN199945_c4_g1_i1.p1	type:5prime_partial	(-),score=20.00,B3GT1_PONPY	High	32.218 1.17e-34,Galactosyl_T|PF01762.21|1.9e-43 OFAVBQ_DN199945_c4_g1_i1:147-920(-)	0	0.976	6	2	8	2	1	257	30.3	9.51	0	2	1.486	2.006	1.422	1.666	1.115	1.028	0.918	75.2	111.7	150.8	106.9	125.3	83.9	77.3	69	Medium	Medium	Medium	Medium	Medium	Medium	Medium	Medium
OFAVBQ_DN113413_c0_g1_i1.p2	type:3prime_partial	(-),score=27.83,CALM_SACJA	High	95.402 1.21e-53,CALM_SACJA|46.053|7.78e-13,EF-hand_1|PF00036.32|4.3e-10,EF-hand_1|PF00036.32|3.4e-08,EF-hand_6|PF13405.6|4.6e-10,EF-hand_6|PF13405.6|0.0025,EF-hand_7|PF13499.6|2.7e-14,EF-hand_5|PF13202.6|9.2e-07,EF-hand_5|PF13202.6|0.00011,EF-hand_8|PF13833.6|0.063,EF-hand_8|PF13833.6|2.9e-11,EF-hand_9|PF14658.6|2.7e-08,EF-hand_4|PF12763.7|0.005,Caleosin|PF05042.13|0.089,Caleosin|PF05042.13|3.1e+…	0	0.976	8	1	9	1	1	87	9.7	4.09	8.74	1	1.233	1.572	0.871	0.684	0.662	1.168	0.637	102.2	126.1	160.6	89	69.9	67.7	119.4	65.1	High	High	High	High	High	High	High	High
OFAVBQ_DN218030_c2_g1_i1.p1	type:complete	(-),score=13.39,KCP_HALAI	High	43.443 2.45e-33,Kunitz_BPTI|PF00014.23|1e-17,Kunitz_BPTI|PF00014.23|6e-20 OFAVBQ_DN218030_c2_g1_i1:371-790(-)	0	0.976	9	1	8	1	1	139	15.4	9.25	2.26	1	1.308	0.721	0.856	0.933	0.543	0.565	0.572	123.1	161	88.8	105.4	114.9	66.9	69.6	70.4	Low	Low	Low	Low	Low	Low	Low	Low
OFAVBQ_DN194846_c2_g2_i1.p2	type:internal	(-),score=18.44,H3_VOLCA	High	88.034 2.51e-69,Histone|PF00125.24|1e-37,PAF|PF15715.5|0.00092 OFAVBQ_DN194846_c2_g2_i1:2-361(-)	0	0.976	15	2	3	1	1	120	13.4	10.84	4.88	2																Low	Low	Low	Low	Low	Low	Low	Low
OFAVBQ_DN30056_c0_g1_i1.p2	type:5prime_partial	(-),score=15.43,H3_EUPCR	High	88.971 9.50e-86,Histone|PF00125.24|4.7e-52,PAF|PF15715.5|0.00016,CENP-S|PF15630.6|0.00072,CENP-T_C|PF15511.6|5.4e+03,CENP-T_C|PF15511.6|0.0014,CBFD_NFYB_HMF|PF00808.23|3.1e+03,CBFD_NFYB_HMF|PF00808.23|0.062 OFAVBQ_DN30056_c0_g1_i1:18-449(-)	0	0.976	17	3	5	1	1	143	16.3	11.15	7.2	3																Low	Not Found	Low	Low	Low	Low	Low	Low
OFAVBQ_DN213435_c0_g1_i1.p1	type:complete	(-),score=35.78,SNX6_PONAB	High	59.444 1.78e-68,Vps5|PF09325.10|6.6e-05,Vps5|PF09325.10|4.3e-08,BAR|PF03114.18|0.00012,Ntox28|PF15605.6|0.11,HR1|PF02185.16|43,Acyl-CoA_dh_2|PF08028.11|3.9e+03,Acyl-CoA_dh_2|PF08028.11|2.2,Acyl-CoA_dh_2|PF08028.11|60 OFAVBQ_DN213435_c0_g1_i1:2239-2793(-)	0	0.976	4	1	1	1	1	184	21.3	9.45	2.31	1	1.091	0.823	1.381	0.936	2.795	2.544	2.052	63.4	69.2	52.2	87.5	59.3	177.1	161.3	130	High	High	High	High	High	High	High	High
OFAVBQ_DN224732_c0_g2_i4.p1	type:complete	(-),score=448.86,MPDZ_MOUSE	High	30.020 0.0,MPDZ_MOUSE|45.337|7.90e-151,MPDZ_MOUSE|35.325|5.12e-42,MPDZ_MOUSE|26.389|3.07e-31,MPDZ_MOUSE|24.713|1.85e-28,MPDZ_MOUSE|31.837|3.64e-19,MPDZ_MOUSE|27.731|1.05e-17,MPDZ_MOUSE|27.737|2.27e-14,MPDZ_MOUSE|27.532|9.42e-14,MPDZ_MOUSE|29.224|3.84e-13,MPDZ_MOUSE|40.816|2.73e-12,MPDZ_MOUSE|42.045|2.60e-10,MPDZ_MOUSE|44.318|8.33e-09,MPDZ_MOUSE|39.423|1.79e-08,MPDZ_MOUSE|36.842|1.74e-06,PDZ|PF005…	0	0.976	1	2	2	2	1	2015	215.8	5.1	0	2	1.381	2.03	1.248	1.009	3.522	1.881	0.811	62.1	85.8	126.1	77.5	62.7	218.7	116.8	50.4	Low	Low	Low	Low	Low	Low	Low	Low
OFAVBQ_DN215929_c5_g1_i2.p2	type:complete	(-),score=13.31,COX6C_NYCCO	High	40.000 8.08e-12,COX6C|PF02937.15|2.1e-16 OFAVBQ_DN215929_c5_g1_i2:264-476(-)	0	0.976	17	1	2	1	1	70	8	9.14	0	1																Medium	Not Found	Medium	Medium	Medium	Not Found	Medium	Medium
OFAVBQ_DN204089_c6_g1_i1.p1	type:complete	(-),score=98.80,TPM_TRIPS	High	30.736 7.12e-16,Tropomyosin|PF00261.20|6.8e-36,Tropomyosin_1|PF12718.7|9.9e-07,Tropomyosin_1|PF12718.7|29,Tropomyosin_1|PF12718.7|4,NPV_P10|PF05531.12|0.76,NPV_P10|PF05531.12|3.8e+02,NPV_P10|PF05531.12|2.5,NPV_P10|PF05531.12|2.7,ERM|PF00769.19|5.5e+03,ERM|PF00769.19|0.00037,Fib_alpha|PF08702.10|1.3,Fib_alpha|PF08702.10|0.033,DUF745|PF05335.13|0.0025,DUF745|PF05335.13|96,DUF745|PF05335.13|3.7e+02,…	0	0.976	6	2	5	2	1	301	35.3	4.42	0	2																Medium	Low	Medium	Medium	Medium	Medium	Medium	Medium
OFAVBQ_DN199373_c0_g1_i1.p1	type:internal	(-),score=10.82,H3_STRPU	High	100.000 2.16e-43,Histone|PF00125.24|6.2e-18,PAF|PF15715.5|0.00022 OFAVBQ_DN199373_c0_g1_i1:3-221(-)	0	0.976	33	3	4	1	1	73	8.2	12.09	7.2	3																Low	Low	Low	Low	Low	Low	Low	Low
OFAVBQ_DN197295_c0_g1_i2.p1	type:complete	(-),score=55.35,PSB7_RAT	High	70.000 7.18e-140,Proteasome|PF00227.26|4.5e-48,Pr_beta_C|PF12465.8|1.8e+04,Pr_beta_C|PF12465.8|2.5e-14,TRAP_beta|PF05753.14|0.15 OFAVBQ_DN197295_c0_g1_i2:233-1069(-)	0.025	0.419	4	1	1	1	1	278	30	8.4	2.06	1	0.01	1.076	0.851	1.056	0.874	0.846	0.718	124.6		134.1	106.1	131.5	108.9	105.4	89.5	Low	Not Found	Low	Low	Low	Low	Low	Low
OFAVBQ_DN222214_c0_g2_i2.p1	type:complete	(-),score=723.42,ANT1_ONCVO	High	22.809 7.85e-08,CENP-F_leu_zip|PF10473.9|7.2e+02,CENP-F_leu_zip|PF10473.9|1.8e+02,CENP-F_leu_zip|PF10473.9|0.48,CENP-F_leu_zip|PF10473.9|13,CENP-F_leu_zip|PF10473.9|6.2e-06,CENP-F_leu_zip|PF10473.9|0.6,CENP-F_leu_zip|PF10473.9|21,CENP-F_leu_zip|PF10473.9|0.57,CENP-F_leu_zip|PF10473.9|0.6,CENP-F_leu_zip|PF10473.9|1.2,CENP-F_leu_zip|PF10473.9|1.8e+02,CENP-F_leu_zip|PF10473.9|1.1e+02,CENP-F_leu_zip|…	0.022	0.419	2	6	7	6	1	2827	326.1	5.29	1.94	6	1.106	1.216	0.97	0.81	0.985	0.897	1.005	100.1	110.7	121.8	97.1	81.1	98.6	89.9	100.7	Low	Low	Low	Low	Low	Low	Low	Low
OFAVBQ_DN216347_c0_g2_i1.p6			High	OFAVBQ_DN216347_c0_g2~~OFAVBQ_DN216347_c0_g2_i1.p6 ORF type:complete len:95 (+),score=11.22 OFAVBQ_DN216347_c0_g2_i1:4052-4336(+)	0.019	0.419	6	1	4	1	1	94	10.6	9.95	0	1	0.716	1.768	1.426	0.969	1.786	1.396	1.446	76.1	54.5	134.6	108.6	73.8	136	106.3	110.1	Low	Low	Low	Low	Low	Low	Low	Low
OFAVBQ_DN203043_c0_g1_i1.p1	type:complete	(-),score=107.06,DISP1_HUMAN	High	24.263 8.56e-51,Patched|PF02460.18|1.5e-17,Patched|PF02460.18|3.3e-08,Sterol-sensing|PF12349.8|2.6e-10,Sterol-sensing|PF12349.8|0.0059,MMPL|PF03176.15|1.8e+04,MMPL|PF03176.15|0.003 OFAVBQ_DN203043_c0_g1_i1:397-3480(-)	0.023	0.419	1	2	2	2	1	1027	116.3	8.46	0	2																Low	Low	Low	Low	Low	Low	Low	Low
OFAVBQ_DN209491_c5_g1_i4.p1			High	OFAVBQ_DN209491_c5_g1~~OFAVBQ_DN209491_c5_g1_i4.p1 ORF type:3prime_partial len:197 (-),score=21.87 OFAVBQ_DN209491_c5_g1_i4:2-589(-)	0.019	0.419	4	1	6	1	1	196	22.2	7.94	0	1																Low	Low	Low	Low	Low	Low	Low	Low
OFAVBQ_DN161334_c0_g2_i1.p3	type:internal	(-),score=17.29,Cu-binding_MopE	High	PF11617.8 4.6,Cu-binding_MopE|PF11617.8|1.2,Cu-binding_MopE|PF11617.8|2e+03 OFAVBQ_DN161334_c0_g2_i1:3-227(-)	0.02	0.419	29	1	1	1	1	75	8.1	4.82	0	1																Not Found	Not Found	Not Found	Not Found	Not Found	Not Found	Not Found	Not Found
OFAVBQ_DN216307_c1_g3_i4.p1	type:complete	(-),score=128.72,TKT_BOVIN	High	60.386 0.0,Transketolase_N|PF00456.21|1.3e-47,Transketolase_N|PF00456.21|9.1e+02,Transket_pyr|PF02779.24|9.3e-32,Transketolase_C|PF02780.20|4.1e-28,E1_dh|PF00676.20|9.1e-13,DXP_synthase_N|PF13292.6|9.2e-07,DXP_synthase_N|PF13292.6|59,XFP_N|PF09364.10|0.00014,AlaDh_PNT_C|PF01262.21|0.15 OFAVBQ_DN216307_c1_g3_i4:466-2334(-)	0.025	0.419	1	1	1	1	1	622	67.6	6.7	0	1																Low	Low	Low	Low	Low	Low	Low	Low
OFAVBQ_DN215758_c1_g4_i1.p1	type:complete	(-),score=48.04,ASML_HUMAN	High	40.571 8.43e-75,Methyltransf_2|PF00891.18|3.2e-44,Dimerisation2|PF16864.5|3.3e-26,Dimerisation|PF08100.11|7.5e-06,HTH_IclR|PF09339.10|1,HTH_IclR|PF09339.10|1.1e+02,HTH_IclR|PF09339.10|1.3e+03,Methyltransf_25|PF13649.6|0.027,Methyltransf_23|PF13489.6|0.033,Methyltransf_12|PF08242.12|0.1,MTS|PF05175.14|0.32 OFAVBQ_DN215758_c1_g4_i1:11-1078(-)	0.019	0.419	2	1	121	1	1	355	39.3	5.78	0	1	0.813	1.269	0.837	0.847	0.742	0.949	0.742	111.1	90.4	141.1	93	94.1	82.5	105.4	82.4	Low	Low	Low	Low	Low	Low	Low	Low
OFAVBQ_DN223913_c6_g1_i2.p1	type:5prime_partial	(-),score=55.99,CABIT	High	PF12736.7 1.5e-10 OFAVBQ_DN223913_c6_g1_i2:434-1774(-)	0.019	0.419	4	2	2	2	1	446	50.5	5.34	0	2																Low	Not Found	Low	Low	Low	Low	Low	Low
OFAVBQ_DN221201_c1_g1_i1.p1	type:5prime_partial	(-),score=7.75,RET_MOUSE	High	43.333 1.25e-11,Pkinase_Tyr|PF07714.17|9.1e-11,Pkinase|PF00069.25|0.11 OFAVBQ_DN221201_c1_g1_i1:959-1186(-)	0.023	0.419	12	1	1	1	1	75	8.9	8.88	0	1																Low	Not Found	Low	Low	Low	Low	Low	Low
OFAVBQ_DN216825_c1_g2_i2.p1	type:complete	(-),score=106.94,KLH12_MOUSE	High	57.914 0.0,KLH12_MOUSE|38.384|4.56e-13,Kelch_1|PF01344.25|1e-08,Kelch_1|PF01344.25|2.1e-14,Kelch_1|PF01344.25|2.7e-12,Kelch_1|PF01344.25|8.2e-15,Kelch_1|PF01344.25|2.2e-15,Kelch_1|PF01344.25|9.4e-13,Kelch_6|PF13964.6|3.7e-05,Kelch_6|PF13964.6|5.2e-09,Kelch_6|PF13964.6|3.7e-05,Kelch_6|PF13964.6|3.7e-05,Kelch_6|PF13964.6|0.00035,Kelch_6|PF13964.6|0.0015,Kelch_2|PF07646.15|0.18,Kelch_2|PF07646.15|4.…	0.019	0.419	2	1	2	1	1	569	63.2	5.45	0	1																Low	Not Found	Low	Low	Low	Low	Low	Low
OFAVBQ_DN223063_c0_g3_i1.p2			High	OFAVBQ_DN223063_c0_g3~~OFAVBQ_DN223063_c0_g3_i1.p2 ORF type:5prime_partial len:89 (+),score=23.44 OFAVBQ_DN223063_c0_g3_i1:3-269(+)	0.027	0.419	14	1	3	1	1	88	9.6	4.23	0	1																Not Found	Not Found	Low	Not Found	Low	Low	Not Found	Not Found
OFAVBQ_DN218503_c1_g2_i6.p1	type:complete	(-),score=388.90,SPG17_HUMAN	High	29.730 1.06e-107,SPG17_HUMAN|33.133|1.58e-81,Tcp10_C|PF07202.13|12,Tcp10_C|PF07202.13|1.3e+02,Tcp10_C|PF07202.13|5.4,GCS2|PF04107.13|0.022 OFAVBQ_DN218503_c1_g2_i6:3254-8707(-)	0.024	0.419	4	5	15	5	1	1817	202.3	5.92	0	5	1.356	1.169	0.789	0.995	0.875	0.885	0.985	99.3	134.7	116.1	78.4	98.8	86.9	87.9	97.8	Low	Low	Low	Low	Low	Low	Low	Low
OFAVBQ_DN224305_c2_g1_i5.p1	type:complete	(-),score=358.58,SSH2_HUMAN	High	54.610 2.15e-148,DSPc|PF00782.20|3.5e-32,DEK_C|PF08766.11|3.7e-10 OFAVBQ_DN224305_c2_g1_i5:1432-6378(-)	0.027	0.419	0	1	2	1	1	1648	184.9	5.05	0	1																Low	Not Found	Low	Low	Low	Low	Low	Low
OFAVBQ_DN220906_c3_g1_i4.p1	type:complete	(-),score=181.71,CCD78_XENLA	High	37.591 7.98e-96,Kinesin|PF00225.23|1.4e-53,Kinesin|PF00225.23|2.1e+03,DUF4472|PF14739.6|61,DUF4472|PF14739.6|9.3e-31,DUF4472|PF14739.6|2.7e+03,DUF4472|PF14739.6|6.4e+02,DUF4472|PF14739.6|3.4e+02,DUF4472|PF14739.6|1.4e+02,DUF4472|PF14739.6|1.6e+03,Microtub_bd|PF16796.5|8e-16,Microtub_bd|PF16796.5|2.7e+03,Microtub_bd|PF16796.5|21 OFAVBQ_DN220906_c3_g1_i4:487-3228(-)	0.02	0.419	2	2	2	2	1	913	104.1	6.49	0	2																Low	Low	Low	Low	Low	Low	Low	Low
OFAVBQ_DN219616_c1_g2_i5.p1	type:complete	(-),score=152.18,LEKR1_HUMAN	High	31.307 1.09e-28,HOOK|PF05622.12|0.00053,HOOK|PF05622.12|2.1e+03,HOOK|PF05622.12|4.6e+02,AAA_13|PF13166.6|0.33,AAA_13|PF13166.6|4.2,AAA_13|PF13166.6|51,AAA_13|PF13166.6|0.0088,Fez1|PF06818.15|86,Fez1|PF06818.15|5,Fez1|PF06818.15|6.4e+02,Fez1|PF06818.15|22,Fez1|PF06818.15|0.0055,APG6_N|PF17675.1|0.0069,APG6_N|PF17675.1|6.2e+03,APG6_N|PF17675.1|1.8e+04,APG6_N|PF17675.1|1.8e+04,APG6_N|PF17675.1|2.9e+…	0.022	0.419	2	2	2	2	1	672	77	5.57	0	2	0.919	0.988	0.845	0.777	0.863	0.693	1.023	112.5	103.4	111.1	95.1	87.5	97.2	78	115.2	Low	Low	Low	Low	Low	Low	Low	Low
OFAVBQ_DN224435_c2_g1_i2.p1	type:3prime_partial	(-),score=89.51,NB-ARC	High	PF00931.22 0.00073,NB-ARC|PF00931.22|0.0025,AAA_16|PF13191.6|1.3e-05,AAA|PF00004.29|1.1e-05,AAA_25|PF13481.6|0.014,AAA_25|PF13481.6|2.3,AAA_22|PF13401.6|0.00038,AAA_22|PF13401.6|4e+03,AAA_22|PF13401.6|3.1e+03,ATPase_2|PF01637.18|0.00021,NACHT|PF05729.12|0.0011,NACHT|PF05729.12|1.2e+03,AAA_24|PF13479.6|0.0046,DUF2019|PF09450.10|2.5e+02,DUF2019|PF09450.10|0.16,RsgA_GTPase|PF03193.16|0.036,AAA_14|PF…	0.023	0.419	1	1	1	1	1	583	66	6.51	0	1																Low	Low	Low	Low	Low	Low	Low	Low
OFAVBQ_DN221093_c1_g2_i1.p1	type:complete	(-),score=120.51,VAT1_DANRE	High	53.043 5.84e-131,ADH_zinc_N_2|PF13602.6|6.1e-22,ADH_zinc_N|PF00107.26|1.1e-17,ADH_N|PF08240.12|7.2e-12,Adeno_E1A|PF02703.14|0.002,DUF5546|PF17700.1|0.15,TonB_N|PF16031.5|1.8,SPESP1|PF15754.5|9,Trypan_PARP|PF05887.11|3.7e+02,Trypan_PARP|PF05887.11|1.5 OFAVBQ_DN221093_c1_g2_i1:2206-3507(-)	0.02	0.419	3	1	4	1	1	433	47.3	5.05	0	1																Low	Low	Low	Low	Low	Low	Low	Low
OFAVBQ_DN211150_c0_g1_i1.p1	type:5prime_partial	(-),score=33.69,RM15_XENLA	High	49.554 1.68e-54,Ribosomal_L27A|PF00828.19|1.4e-31,Ribosomal_L27A|PF00828.19|1.5e+03 OFAVBQ_DN211150_c0_g1_i1:1192-1911(-)	0.02	0.419	9	2	3	2	1	239	27.2	10.59	0	2	1.775	1.49	1.214	1.417	0.751	1.368	0.879	80.9	143.5	120.5	98.2	114.5	60.7	110.6	71.1	Low	Low	Low	Low	Low	Low	Low	Low
OFAVBQ_DN219174_c0_g1_i1.p1	type:3prime_partial	(-),score=56.21,GP2_RAT	High	40.816 1.08e-13,CC|PF04942.14|0.14,cEGF|PF12662.7|2.8e+03,cEGF|PF12662.7|5.5e+03,cEGF|PF12662.7|0.25 OFAVBQ_DN219174_c0_g1_i1:3-1883(-)	0.021	0.419	1	1	2	1	1	627	68.7	5.49	0	1																Low	Not Found	Low	Low	Low	Low	Low	Low
OFAVBQ_DN222013_c0_g2_i1.p1	type:complete	(-),score=666.26,PRC2A_HUMAN	High	36.771 1.42e-09 OFAVBQ_DN222013_c0_g2_i1:1138-8823(-)	0.022	0.419	2	5	6	5	1	2561	283.6	9.41	0	5																Low	Low	Low	Low	Low	Low	Low	Low
OFAVBQ_DN225461_c2_g2_i1.p1			High	OFAVBQ_DN225461_c2_g2~~OFAVBQ_DN225461_c2_g2_i1.p1 ORF type:5prime_partial len:100 (-),score=8.98 OFAVBQ_DN225461_c2_g2_i1:122-421(-)	0.022	0.419	24	1	1	1	1	99	10.6	8.09	0	1																Low	Not Found	Low	Low	Low	Low	Low	Low
OFAVBQ_DN224470_c0_g1_i6.p1	type:complete	(-),score=257.63,Peptidase_A17	High	PF05380.13 1.1e+04,Peptidase_A17|PF05380.13|4.5e-59,DUF5641|PF18701.1|4e-28,DUF1759|PF03564.15|88,DUF1759|PF03564.15|8e-20,rve|PF00665.26|5.7e-10,Integrase_H2C2|PF17921.1|4.6e+03,Integrase_H2C2|PF17921.1|9.1e-06,DUF1758|PF05585.12|0.00021,Asp_protease_2|PF13650.6|0.00078,RVT_1|PF00078.27|5.8e+03,RVT_1|PF00078.27|0.0013,Olduvai|PF06758.13|0.29,zf-H2C2|PF09337.10|0.33,gag-asp_proteas|PF13975.6|0.41…	0.021	0.419	2	3	4	2	1	1948	224.5	7.99	0	3	0.01	1.498	0.801	1.301	0.822	0.981	0.873	110		164.7	88	143	90.4	107.9	96	Low	Low	Low	Low	Low	Low	Low	Low
OFAVBQ_DN211139_c3_g1_i2.p1	type:complete	(+),score=75.08,POGK_HUMAN	High	22.261 3.27e-10,DDE_1|PF03184.19|1.3e-07,HTH_Tnp_Tc5|PF03221.16|0.017,HTH_Tnp_Tc5|PF03221.16|5.2e+03 OFAVBQ_DN211139_c3_g1_i2:2356-3882(+)	0.025	0.419	3	1	1	1	1	508	57.5	9.42	0	1																Low	Low	Low	Low	Low	Low	Low	Low
OFAVBQ_DN225423_c3_g1_i2.p1	type:complete	(-),score=583.92,UBR5_MOUSE	High	44.988 0.0,HECT|PF00632.25|1.4e-60,E3_UbLigase_EDD|PF11547.8|2.6e-28,PABP|PF00658.18|2.6e-19,uDENN|PF03456.18|0.31 OFAVBQ_DN225423_c3_g1_i2:2069-10342(-)	0.021	0.419	2	5	5	5	1	2757	299	5.95	1.96	5	0.812	0.714	0.951	3.483	0.727	0.654	0.544	90	73.1	64.3	85.6	313.6	65.5	58.8	49	Low	Low	Low	Low	Low	Low	Low	Low
OFAVBQ_DN195709_c3_g4_i1.p1	type:complete	(-),score=127.56,EF1A_DANRE	High	87.336 0.0,GTP_EFTU|PF00009.27|2.9e-52,GTP_EFTU_D3|PF03143.17|3.7e-40,GTP_EFTU_D2|PF03144.25|4.4e+03,GTP_EFTU_D2|PF03144.25|3e-15,MMR_HSR1|PF01926.23|0.018,GTP_EFTU_D4|PF14578.6|9.8e+03,GTP_EFTU_D4|PF14578.6|0.0018,Dynamin_N|PF00350.23|24,Dynamin_N|PF00350.23|20 OFAVBQ_DN195709_c3_g4_i1:704-2095(-)	0.023	0.419	8	5	10	2	1	463	50.8	9.01	1.66	5	1.649	0.667	1.218	0.955	0.823	0.933	0.735	100.3	165.3	66.9	122.1	95.7	82.5	93.5	73.7	Low	Low	Low	Low	Low	Low	Low	Low
OFAVBQ_DN194839_c0_g1_i2.p1	type:complete	(-),score=22.43,GAMT_DANRE	High	67.273 3.87e-52 OFAVBQ_DN194839_c0_g1_i2:1523-1879(-)	0.022	0.419	21	1	1	1	1	118	13.4	6.32	0	1																Low	Not Found	Low	Low	Low	Not Found	Low	Low
OFAVBQ_DN218015_c5_g2_i5.p1	type:complete	(-),score=117.72,TCHP_XENLA	High	47.697 2.17e-73,TPH|PF13868.6|2.3e-25 OFAVBQ_DN218015_c5_g2_i5:838-1815(-)	0.026	0.419	5	2	2	2	1	325	39.9	5.4	0	2																Low	Low	Low	Low	Low	Low	Low	Low
OFAVBQ_DN207595_c1_g2_i1.p1	type:complete	(-),score=170.10,LMNB1_MOUSE	High	30.796 2.22e-55,LMNB1_MOUSE|44.118|7.62e-25,LTD|PF00932.19|1.9e-13,LTD|PF00932.19|1.7e-12,Filament|PF00038.21|3.5e-14,Filament|PF00038.21|1.1e-10,DSX_dimer|PF08828.10|2.8e+03,DSX_dimer|PF08828.10|0.21,MepB|PF08877.10|6.3e+03,MepB|PF08877.10|57,MepB|PF08877.10|6.4 OFAVBQ_DN207595_c1_g2_i1:1280-3424(-)	0.024	0.419	3	2	2	2	1	714	82.4	6.14	0	2																Low	Low	Low	Low	Low	Low	Low	Low
OFAVBQ_DN210468_c0_g1_i2.p1	type:complete	(-),score=59.13,PR38A_XENLA	High	66.372 1.02e-107,PRP38|PF03371.15|1.2e-61,PRP38_assoc|PF12871.7|0.0094,PRP38_assoc|PF12871.7|1.2e+04,DUF936|PF06075.12|0.056,SRP-alpha_N|PF04086.13|3.9 OFAVBQ_DN210468_c0_g1_i2:718-1755(-)	0.024	0.419	14	4	5	4	1	345	40.9	10.33	0	4																Low	Low	Low	Low	Low	Low	Low	Low
OFAVBQ_DN221469_c0_g2_i2.p1	type:complete	(-),score=279.06,NOS1_RAT	High	55.284 0.0,NOS1_RAT|46.324|4.29e-33,NOS1_RAT|35.556|3.27e-19,NO_synthase|PF02898.15|3.7e-181,FAD_binding_1|PF00667.20|3.3e+03,FAD_binding_1|PF00667.20|1.7e-69,Flavodoxin_1|PF00258.25|2.6e-46,NAD_binding_1|PF00175.21|0.001,NAD_binding_1|PF00175.21|4.4e-11,PDZ|PF00595.24|1.9e-10,PDZ_6|PF17820.1|5.6e-07,PDZ_6|PF17820.1|7.1e+03,PDZ_2|PF13180.6|0.0016,PDZ_2|PF13180.6|3e+03,FAD_binding_6|PF00970.24|31,…	0.026	0.419	2	3	9	3	1	1450	161.8	7.71	0	3																Low	Low	Low	Low	Low	Low	Low	Low
OFAVBQ_DN216978_c1_g7_i2.p1	type:complete	(-),score=101.99,CGAS_HUMAN	High	23.768 6.48e-09,Mab-21|PF03281.14|2.4e-30,Latarcin|PF10279.9|1.5,Latarcin|PF10279.9|62 OFAVBQ_DN216978_c1_g7_i2:1487-3334(-)	0.024	0.419	2	1	1	1	1	615	71.2	5.67	0	1	0.01	0.779	1.306	1.154	1.232	1.556	0.693	103.6		80.7	135.4	119.6	127.6	161.2	71.8	Low	Not Found	Low	Low	Low	Low	Low	Low
OFAVBQ_DN222419_c0_g1_i9.p1	type:complete	(-),score=293.79,PUB	High	PF09409.10 8.9e-05 OFAVBQ_DN222419_c0_g1_i9:712-4470(-)	0.02	0.419	2	2	3	2	1	1252	141.1	8.81	0	2																Low	Low	Low	Low	Low	Low	Low	Low
OFAVBQ_DN222776_c1_g2_i3.p1	type:complete	(-),score=330.01,TRPM3_HUMAN	High	34.098 0.0,LSDAT_euk|PF18139.1|5.7e-87,LSDAT_prok|PF18171.1|4.3e-23,Ion_trans|PF00520.31|4e-16,PKD_channel|PF08016.12|3.8,PKD_channel|PF08016.12|1.4e-08,NUDIX|PF00293.28|4.3e-05 OFAVBQ_DN222776_c1_g2_i3:792-5645(-)	0.024	0.419	3	5	10	5	1	1617	181.9	6.8	0	5																Low	Low	Low	Low	Low	Low	Low	Low
OFAVBQ_DN214070_c7_g1_i1.p1	type:3prime_partial	(-),score=21.67,ACTB_RABIT	High	90.909 4.45e-63,Actin|PF00022.19|2e-32 OFAVBQ_DN214070_c7_g1_i1:1-297(-)	0.025	0.419	20	2	2	2	1	99	10.9	5.77	3.75	2	1.177	1.52	0.489	0.48	0.533	0.304	0.461	134.1	157.8	204	65.6	64.3	71.5	40.7	61.8	Low	Low	Low	Low	Low	Low	Low	Low
OFAVBQ_DN53995_c0_g1_i1.p1	type:complete	(-),score=68.72,RLA0_CAEEL	High	64.630 2.41e-142,Ribosomal_L10|PF00466.20|1.8e-22,Ribosomal_L10|PF00466.20|13,RL10P_insert|PF17777.1|2.4e-19,RL10P_insert|PF17777.1|6.2e+03,Ribosomal_60s|PF00428.19|5.1e+03,Ribosomal_60s|PF00428.19|4.1e-16 OFAVBQ_DN53995_c0_g1_i1:19-954(-)	0.027	0.419	2	1	1	1	1	311	34.2	5.29	0	1	0.01	0.976	1.045	1.154	1.035	1.381	2.671	86.4		84.4	90.2	99.7	89.4	119.3	230.7	Low	Not Found	Low	Low	Low	Low	Low	Low
OFAVBQ_DN215323_c1_g3_i3.p1	type:5prime_partial	(-),score=15.82,SVEP1_HUMAN	High	44.444 4.52e-16,SVEP1_HUMAN|34.351|5.31e-14,SVEP1_HUMAN|39.785|3.70e-13,SVEP1_HUMAN|39.000|1.57e-12,SVEP1_HUMAN|35.484|4.08e-12,SVEP1_HUMAN|39.130|8.04e-12,SVEP1_HUMAN|39.048|2.03e-10,SVEP1_HUMAN|33.333|2.69e-10,SVEP1_HUMAN|33.663|9.55e-10,SVEP1_HUMAN|33.981|1.79e-09,SVEP1_HUMAN|34.375|1.93e-09,SVEP1_HUMAN|31.579|1.03e-08,SVEP1_HUMAN|31.897|2.07e-08,SVEP1_HUMAN|34.343|2.62e-08,SVEP1_HUMAN|32.258|…	0.028	0.419	3	1	1	1	1	219	24.9	9.47	0	1	0.01	1.491	0.731	1.094	1.085	0.876	1.827	98.7		147.2	72.1	108	107.1	86.5	180.4	Low	Not Found	Low	Low	Low	Low	Low	Low
OFAVBQ_DN212753_c2_g1_i4.p1	type:complete	(-),score=44.63,ERL2A_XENLA	High	74.000 7.29e-74 OFAVBQ_DN212753_c2_g1_i4:1227-1763(-)	0.025	0.419	12	2	2	2	1	178	20.1	9.09	0	2	1.481	1.012	0.952	1.198	0.703	1.054	0.63	99.6	147.6	100.8	94.8	119.3	70	105	62.8	Low	Low	Low	Low	Low	Low	Low	Low
OFAVBQ_DN218976_c2_g3_i2.p1	type:complete	(-),score=67.94,NodZ	High	PF05830.11 97,NodZ|PF05830.11|0.056,NodZ|PF05830.11|4.9e+02,Toxin-JAB1|PF15659.6|0.042,XG_FTase|PF03254.13|1.3e+03,XG_FTase|PF03254.13|0.05 OFAVBQ_DN218976_c2_g3_i2:364-2382(-)	0.027	0.419	5	4	61	4	1	672	77.4	9	0	4	0.767	1.628	0.819	0.54	0.91	1.018	0.778	107.2	82.2	174.6	87.8	57.9	97.6	109.2	83.4	Low	Low	Low	Low	Low	Low	Low	Low
OFAVBQ_DN219367_c2_g2_i2.p3	type:complete	(+),score=66.43,DUF1759	High	PF03564.15 14,DUF1759|PF03564.15|2.2e+03,DUF1759|PF03564.15|1.7e-19,Olduvai|PF06758.13|0.054,DUF892|PF05974.12|1.3,DUF892|PF05974.12|4.2,Raftlin|PF15250.6|0.93,DUF5314|PF17241.2|12,DUF5314|PF17241.2|1.7e+02,DUF5314|PF17241.2|28,DUF5314|PF17241.2|4.4e+03,DUF445|PF04286.12|1.3,DUF445|PF04286.12|3.3e+03,DUF4407|PF14362.6|20 OFAVBQ_DN219367_c2_g2_i2:2444-3739(+)	0.021	0.419	4	2	4	1	1	431	50.1	5.39	0	2																Low	Low	Low	Low	Low	Low	Low	Low
OFAVBQ_DN204578_c0_g1_i3.p1	type:complete	(-),score=41.63,LPMO_10	High	PF03067.15 1.2e-30 OFAVBQ_DN204578_c0_g1_i3:398-1249(-)	0.019	0.419	2	1	1	1	1	283	31.2	8.72	0	1	1.649	1.575	1.02	1.53	1.084	1.214	0.596	82.8	136.5	130.4	84.4	126.6	89.7	100.4	49.3	Low	Low	Low	Low	Low	Low	Low	Low
OFAVBQ_DN222103_c1_g1_i1.p1	type:complete	(-),score=377.58,FREM2_HUMAN	High	41.116 0.0,Cadherin_3|PF16184.5|2.7,Cadherin_3|PF16184.5|2.9e-09,Cadherin_3|PF16184.5|3.9e-22,Cadherin_3|PF16184.5|8.3e-16,Cadherin_3|PF16184.5|2.4e-11,Cadherin_3|PF16184.5|9.2e-18,Cadherin_3|PF16184.5|1.3e-06,Cadherin_3|PF16184.5|1.4e-16,Cadherin_3|PF16184.5|1.1e-22,Cadherin_3|PF16184.5|3.5e-21,Cadherin_3|PF16184.5|2.8e-20,Cadherin_3|PF16184.5|1.8e-24,Cadherin_3|PF16184.5|5.6e-20,Calx-beta|PF031…	0.027	0.419	1	5	17	5	1	3094	346.9	5.58	0	5																Low	Low	Low	Low	Low	Low	Low	Low
OFAVBQ_DN222831_c4_g1_i1.p1	type:3prime_partial	(-),score=16.98,Connexin	High	PF00029.19 0.0088,tRNA_anti-like|PF12869.7|0.02,DUF4834|PF16118.5|0.03,WBP-1|PF11669.8|0.057,Epiglycanin_C|PF14654.6|0.13,DUF3094|PF11293.8|0.36 OFAVBQ_DN222831_c4_g1_i1:2-406(-)	0.019	0.419	4	1	2	1	1	135	15.3	9.58	0	1																Low	Not Found	Low	Low	Low	Low	Low	Low
OFAVBQ_DN31561_c0_g1_i1.p1	type:internal	(-),score=9.13,TERA_XENLA	High	73.913 1.30e-25,Vps4_C|PF09336.10|0.00054,AAA_lid_3|PF17862.1|0.68 OFAVBQ_DN31561_c0_g1_i1:3-209(-)	0.026	0.419	13	1	8	1	1	69	8	4.79	0	1																Low	Low	Low	Low	Low	Low	Low	Low
OFAVBQ_DN225262_c4_g1_i1.p1	type:internal	(-),score=27.07,DHR10	High	PF18595.1 0.05,Arg_decarb_HB|PF17810.1|0.99,Arg_decarb_HB|PF17810.1|1e+02,DUF883|PF05957.13|0.39,DUF883|PF05957.13|27,Syntaxin-6_N|PF09177.11|0.22,Syntaxin-6_N|PF09177.11|2.6e+02 OFAVBQ_DN225262_c4_g1_i1:1-315(-)	0.02	0.419	7	1	1	1	1	105	11.9	5.78	0	1																Low	Low	Low	Low	Low	Low	Low	Low
OFAVBQ_DN219582_c5_g2_i1.p1	type:complete	(-),score=50.78,NET1_MOUSE	High	50.702 0.0,Laminin_N|PF00055.17|1.9e-70,Laminin_N|PF00055.17|1.2e+04,Laminin_N|PF00055.17|1.8e+04,NTR|PF01759.21|5.9e-22,Laminin_EGF|PF00053.24|5.3e+03,Laminin_EGF|PF00053.24|1e+02,Laminin_EGF|PF00053.24|1.8e-05,Laminin_EGF|PF00053.24|1.7e-07,Laminin_EGF|PF00053.24|3.5e-09,Laminin_EGF|PF00053.24|2.6e+03,Laminin_EGF|PF00053.24|1.1e+04,F5_F8_type_C|PF00754.25|0.00044,BNR_6|PF15899.5|0.76 OFAVBQ_DN2…	0.02	0.419	2	2	6	2	1	584	66.5	9.17	0	2	0.992	0.859	0.901	0.958	1.219	1.079	1.112	98.5	97.7	84.6	88.7	94.4	120	106.3	109.6	Low	Low	Low	Low	Low	Low	Low	Low
OFAVBQ_DN222105_c0_g1_i1.p1	type:complete	(-),score=444.65,CTRO_HUMAN	High	38.937 0.0,Pkinase|PF00069.25|8.3e-60,Pkinase|PF00069.25|9.8e+03,Pkinase|PF00069.25|5.8e+03,CNH|PF00780.22|2e-46,Pkinase_Tyr|PF07714.17|1.8e-29,Kinase-like|PF14531.6|3.9e-11,Kinase-like|PF14531.6|6.7e+02,Kinase-like|PF14531.6|5.5e+02,C1_1|PF00130.22|4.1e-07,PH|PF00169.29|3.2e-06,PH|PF00169.29|4.5e+03,Filament|PF00038.21|49,Filament|PF00038.21|0.0035,Filament|PF00038.21|25,Filament|PF00038.21|26,N…	0.027	0.419	1	3	7	3	1	1989	225.6	5.97	0	3	0.779	0.209	2.877	0.567	0.273	0.671	0.221	121.2	94.4	25.4	348.9	68.7	33.2	81.3	26.8	Low	Low	Low	Low	Low	Low	Low	Low
OFAVBQ_DN208270_c8_g2_i5.p1	type:complete	(-),score=22.06,TAGL2_RAT	High	38.346 3.37e-23,CH|PF00307.31|1.2e-20,Thr_dehydrat_C|PF00585.18|0.25 OFAVBQ_DN208270_c8_g2_i5:666-1082(-)	0.025	0.419	7	1	30	1	1	138	15.3	7.97	9.37	1	0.179	0.225	1.515	0.892	0.29	1.15	0.179	147.3	26.3	33.2	223.2	131.4	42.8	169.5	26.4	Low	Low	Low	Low	Low	Low	Low	Low
OFAVBQ_DN206357_c6_g1_i4.p1	type:complete	(-),score=7.36,4EBP2_MOUSE	High	57.447 1.83e-11,eIF_4EBP|PF05456.11|5.2e-17 OFAVBQ_DN206357_c6_g1_i4:1836-2099(-)	0.02	0.419	16	1	2	1	1	87	9.5	7.18	6.14	1																Low	Not Found	Low	Low	Low	Not Found	Low	Low
OFAVBQ_DN200173_c1_g1_i3.p1			High	OFAVBQ_DN200173_c1_g1~~OFAVBQ_DN200173_c1_g1_i3.p1 ORF type:complete len:560 (-),score=69.87 OFAVBQ_DN200173_c1_g1_i3:88-1767(-)	0.021	0.419	3	2	41	2	1	559	62.7	9.19	0	2	1.111	0.878	0.648	2.636	0.644	0.828	0.669	95.1	105.6	83.5	61.6	250.7	61.2	78.7	63.6	Low	Low	Low	Low	Low	Low	Low	Low
OFAVBQ_DN200418_c4_g1_i1.p1	type:complete	(+),score=-4.02,Hen1_L	High	PF12623.7 0.22 OFAVBQ_DN200418_c4_g1_i1:173-424(+)	0.019	0.419	13	1	22	1	1	83	9.6	10.2	0	1																Low	Low	Low	Low	Low	Low	Low	Low
OFAVBQ_DN189040_c0_g1_i2.p1	type:complete	(-),score=6.59,7tm_1	High	PF00001.21 4e-09 OFAVBQ_DN189040_c0_g1_i2:234-770(-)	0.019	0.419	9	2	2	2	1	178	20.3	9.95	0	2																Low	Low	Low	Low	Low	Low	Low	Low
OFAVBQ_DN210373_c3_g3_i3.p1	type:complete	(-),score=117.48,TLL1_XENLA	High	37.500 5.00e-18,TLL1_XENLA|35.577|4.43e-11,TLL1_XENLA|36.275|4.79e-11,TLL1_XENLA|35.000|7.73e-11,TLL1_XENLA|26.180|9.39e-10,CUB|PF00431.20|1.4e+04,CUB|PF00431.20|2.8e-27,CUB|PF00431.20|5.8e+03,GPS|PF01825.21|1.7e-08,SEA|PF01390.20|5.1e+03,SEA|PF01390.20|0.00016,DUF2371|PF10177.9|0.08,DASH_Spc19|PF08287.11|0.08,DASH_Spc19|PF08287.11|6.3e+03,TSP_1|PF00090.19|8.7e+03,TSP_1|PF00090.19|0.082,TSP_1|PF0…	0.022	0.419	1	1	1	1	1	734	82.9	6.13	0	1	2.464	13.239	1.608	1.692	15.375	13.565	3.007	15.4	37.9	203.9	24.8	26.1	236.8	208.9	46.3	Low	Low	Low	Low	Low	Low	Low	Low
OFAVBQ_DN232536_c0_g1_i1.p1	type:internal	(-),score=12.20,RL38_JULON	High	68.519 2.86e-21,Ribosomal_L38e|PF01781.18|9.7e-25,IF3_N|PF05198.16|0.023 OFAVBQ_DN232536_c0_g1_i1:2-226(-)	0.026	0.419	36	3	4	2	1	75	8.6	10.27	1.97	3	1.302	0.926	1.183	1.126	0.724	1.07	0.575	101.2	131.7	93.7	119.7	113.9	73.3	108.3	58.2	Low	Low	Low	Low	Low	Low	Low	Low
OFAVBQ_DN201696_c0_g2_i1.p1	type:complete	(-),score=35.05,DKK3_MOUSE	High	29.710 1.57e-09,Dickkopf_N|PF04706.12|0.0081,Dickkopf_N|PF04706.12|1.8e+04,Conotoxin_I2|PF17557.2|6.2e+03,Conotoxin_I2|PF17557.2|0.019,Conotoxin_I2|PF17557.2|39,UPF0506|PF11703.8|0.029,UPF0506|PF11703.8|1.1e+04,UPF0506|PF11703.8|1.3e+03 OFAVBQ_DN201696_c0_g2_i1:691-1383(-)	0.025	0.419	6	1	13	1	1	230	25.5	8.32	0	1																Low	Not Found	Low	Low	Low	Low	Low	Low
OFAVBQ_DN201373_c3_g1_i1.p1	type:complete	(-),score=37.92,S35B4_DANRE	High	57.317 1.17e-135,UAA|PF08449.11|2.3e-104,TPT|PF03151.16|0.18,TPT|PF03151.16|0.014,EamA|PF00892.20|0.51,EamA|PF00892.20|0.014,Nuc_sug_transp|PF04142.15|0.001,Nuc_sug_transp|PF04142.15|2.6e+02,DUF2157|PF09925.9|0.21,DUF2157|PF09925.9|60,DUF2157|PF09925.9|3.4e+03 OFAVBQ_DN201373_c3_g1_i1:692-1678(-)	0.024	0.419	2	1	8	1	1	328	37.1	8.88	0	1																Low	Low	Low	Low	Low	Low	Low	Low
OFAVBQ_DN219527_c2_g1_i5.p1	type:complete	(-),score=76.44,TUDOR	High	PF00567.24 6e+03,TUDOR|PF00567.24|5.9e-12,Arm|PF00514.23|6.9e+03,Arm|PF00514.23|0.05,Arm|PF00514.23|73,Atx10homo_assoc|PF09759.9|2.3e+03,Atx10homo_assoc|PF09759.9|6.9,Atx10homo_assoc|PF09759.9|3.6e+02 OFAVBQ_DN219527_c2_g1_i5:2843-4108(-)	0.021	0.419	4	2	2	2	1	421	46.7	5.63	1.61	2																Low	Low	Low	Low	Low	Low	Low	Low
OFAVBQ_DN215700_c0_g1_i6.p5			High	OFAVBQ_DN215700_c0_g1~~OFAVBQ_DN215700_c0_g1_i6.p5 ORF type:complete len:83 (-),score=9.40 OFAVBQ_DN215700_c0_g1_i6:415-663(-)	0.02	0.419	9	1	2	1	1	82	9.5	9.52	0	1																Low	Not Found	Low	Low	Low	Not Found	Low	Low
OFAVBQ_DN219885_c2_g1_i3.p1	type:complete	(-),score=181.13,GEN_HUMAN	High	39.506 2.47e-89,XPG_I|PF00867.18|1.6e-22,XPG_I|PF00867.18|1.3e+04,Chromo_2|PF18704.1|4.5e-14,XPG_N|PF00752.17|4.4e-14,bZIP_2|PF07716.15|0.017,bZIP_2|PF07716.15|9.3e+03,Tam41_Mmp37|PF09139.11|0.087,bZIP_1|PF00170.21|5.4e+03,bZIP_1|PF00170.21|0.38 OFAVBQ_DN219885_c2_g1_i3:1574-4336(-)	0.223	0.285	1	1	1	1	1	920	103	5.63	0	1	1.001	0.593	1.261	0.966	0.823	1.047	0.575	110.1	110.2	65.3	138.9	106.4	90.6	115.2	63.3	Low	Low	Low	Low	Low	Low	Low	Low
OFAVBQ_DN199373_c8_g1_i1.p2	type:complete	(-),score=21.83,H2B5_CHICK	High	81.513 2.57e-63,Histone|PF00125.24|1.4e-20,CBFD_NFYB_HMF|PF00808.23|0.00019,TFIID_20kDa|PF03847.13|0.019,YscO-like|PF16789.5|0.018 OFAVBQ_DN199373_c8_g1_i1:519-884(-)	0.242	0.285	12	2	3	2	1	121	13.3	10.45	3.34	2	1.303	1.103	0.836	0.979	0.613	1.141	0.702	104.2	135.8	115	87.1	102	63.9	118.9	73.1	Low	Low	Low	Low	Low	Low	Low	Low
OFAVBQ_DN201975_c9_g1_i1.p1	type:complete	(-),score=33.31,ALP1_ARATH	High	28.197 1.60e-23,DDE_Tnp_4|PF13359.6|2.5e+03,DDE_Tnp_4|PF13359.6|1.6e-29,Plant_tran|PF04827.14|2.9e-09,DDE_Tnp_1|PF01609.21|0.00052,GUN4|PF05419.12|1,GUN4|PF05419.12|1.1e+03 OFAVBQ_DN201975_c9_g1_i1:2181-3497(-)	0.238	0.285	6	3	8	3	1	438	50.9	9.57	0	3																Low	Low	Low	Low	Low	Low	Low	Low
OFAVBQ_DN220633_c2_g2_i1.p1	type:complete	(-),score=265.42,CCD39_XENTR	High	52.088 0.0,Silic_transp|PF03842.13|11 OFAVBQ_DN220633_c2_g2_i1:670-3579(-)	0.243	0.285	5	4	4	4	1	969	112.3	6.8	0	4																Low	Low	Low	Low	Low	Low	Low	Low
OFAVBQ_DN225258_c3_g1_i1.p1	type:internal	(-),score=55.36,FLT3_HUMAN	High	28.877 4.98e-18,Pkinase_Tyr|PF07714.17|2.6e-22,Pkinase|PF00069.25|1.1,Pkinase|PF00069.25|2.1e-11,Fructosamin_kin|PF03881.14|0.048,PRANC|PF09372.10|0.26,stn_TNFRSF12A|PF12191.8|8.6,stn_TNFRSF12A|PF12191.8|84 OFAVBQ_DN225258_c3_g1_i1:1-747(-)	0.235	0.285	2	1	1	1	1	249	28.8	5.6	0	1																Low	Not Found	Low	Low	Low	Low	Low	Low
OFAVBQ_DN191631_c0_g2_i1.p1			High	OFAVBQ_DN191631_c0_g2~~OFAVBQ_DN191631_c0_g2_i1.p1 ORF type:3prime_partial len:250 (-),score=41.54 OFAVBQ_DN191631_c0_g2_i1:1-690(-)	0.226	0.285	3	1	3	1	1	230	26.2	6.44	0	1																Low	Low	Low	Low	Low	Low	Low	Low
OFAVBQ_DN199285_c0_g1_i1.p1	type:complete	(-),score=88.84,HS12A_MOUSE	High	31.955 1.94e-92 OFAVBQ_DN199285_c0_g1_i1:609-2423(-)	0.232	0.285	1	1	3	1	1	604	68	7.18	0	1	1.183	1.344	1.025	1.571	0.926	1.065	0.859	89.2	105.5	119.8	91.4	140.1	82.5	94.9	76.6	Low	Low	Low	Low	Low	Low	Low	Low
OFAVBQ_DN219819_c0_g1_i8.p1	type:complete	(-),score=293.37,CTNA2_PONAB	High	57.815 0.0,CTNA2_PONAB|56.679|5.59e-83,Vinculin|PF01044.19|6.2e-56,Vinculin|PF01044.19|3.5e-88,Vinculin|PF01044.19|9.1e-76,ILEI|PF15711.5|2.2e-11,ILEI|PF15711.5|3e-14,I_LWEQ|PF01608.17|6e+03,I_LWEQ|PF01608.17|1.2e+02,I_LWEQ|PF01608.17|3.4e+02,I_LWEQ|PF01608.17|1.7e+03,I_LWEQ|PF01608.17|3e+03,I_LWEQ|PF01608.17|0.00085,AAA_32|PF13654.6|2.2e+03,AAA_32|PF13654.6|0.0038,AAA_32|PF13654.6|2.3e+02 OFAVBQ…	0.237	0.285	3	3	4	3	1	1170	127.9	6.19	0	3																Low	Low	Low	Low	Low	Low	Low	Low
OFAVBQ_DN224814_c0_g1_i1.p1	type:complete	(-),score=1058.11,CENPF_HUMAN	High	42.857 1.85e-16,TPR_MLP1_2|PF07926.12|2.2e+03,TPR_MLP1_2|PF07926.12|2.6e+03,TPR_MLP1_2|PF07926.12|1.8e+04,TPR_MLP1_2|PF07926.12|1.7e+02,TPR_MLP1_2|PF07926.12|1.8e+04,TPR_MLP1_2|PF07926.12|1.1e+04,TPR_MLP1_2|PF07926.12|5.6e+03,TPR_MLP1_2|PF07926.12|5.3e+03,TPR_MLP1_2|PF07926.12|9.2e+02,TPR_MLP1_2|PF07926.12|7.2,TPR_MLP1_2|PF07926.12|6.7e+03,TPR_MLP1_2|PF07926.12|0.012,TPR_MLP1_2|PF07926.12|2.1e+02…	0.234	0.285	1	4	5	4	1	3648	418.8	5.14	0	4	1.016	0.702	0.863	0.897	1.196	0.778	0.556	114.1	116	80.1	98.5	102.4	136.5	88.7	63.5	Low	Low	Low	Low	Low	Low	Low	Low
OFAVBQ_DN219435_c1_g3_i3.p1	type:complete	(-),score=59.86,CARD	High	PF00619.21 2.4e-15,CARD_2|PF16739.5|1.4e-08,CARD_2|PF16739.5|3.8e+03,MIP-T3_C|PF17749.1|1.2,MIP-T3_C|PF17749.1|1.4e+03,MIP-T3_C|PF17749.1|0.36,KASH_CCD|PF14662.6|0.0043,KASH_CCD|PF14662.6|12,RPW8|PF05659.11|5.3,RPW8|PF05659.11|0.084,DUF16|PF01519.16|27,DUF16|PF01519.16|0.14,Oxidored_nitro|PF00148.19|0.06,MscS_porin|PF12795.7|75,MscS_porin|PF12795.7|0.08,Prismane|PF03063.20|0.2,ABC_tran_CTD|PF1632…	0.233	0.285	4	3	8	3	1	332	39.3	7.47	0	3																Low	Low	Low	Low	Low	Low	Low	Low
OFAVBQ_DN88596_c0_g1_i1.p1			High	OFAVBQ_DN88596_c0_g1~~OFAVBQ_DN88596_c0_g1_i1.p1 ORF type:internal len:109 (-),score=8.63 OFAVBQ_DN88596_c0_g1_i1:3-326(-)	0.229	0.285	13	1	1	1	1	108	12.7	9.29	0	1																Low	Not Found	Low	Low	Low	Low	Low	Low
OFAVBQ_DN188237_c1_g2_i1.p1	type:internal	(-),score=20.44,NRP2_RAT	High	36.047 1.41e-22,NRP2_RAT|31.481|2.70e-06,F5_F8_type_C|PF00754.25|1.1e-25,F5_F8_type_C|PF00754.25|8.4e+02 OFAVBQ_DN188237_c1_g2_i1:3-509(-)	0.237	0.285	5	1	1	1	1	169	19.6	9.51	0	1																Low	Not Found	Low	Low	Low	Low	Low	Low
OFAVBQ_DN207791_c1_g1_i6.p1	type:5prime_partial	(-),score=15.80,G6PT1_HUMAN	High	40.385 1.18e-65,MFS_1|PF07690.16|4.4e-36,MFS_4|PF06779.14|7.7e-08,MLTD_N|PF06474.12|8.8e+03,MLTD_N|PF06474.12|0.42,Imm_superinfect|PF14373.6|1.1e+03,Imm_superinfect|PF14373.6|4.3 OFAVBQ_DN207791_c1_g1_i6:2085-2906(-)	0.228	0.285	10	1	1	1	1	273	30.2	9.31	2.22	1																Low	Not Found	Low	Low	Low	Low	Low	Low
OFAVBQ_DN206474_c3_g2_i1.p1			High	OFAVBQ_DN206474_c3_g2~~OFAVBQ_DN206474_c3_g2_i1.p1 ORF type:complete len:277 (-),score=70.82 OFAVBQ_DN206474_c3_g2_i1:264-1094(-)	0.217	0	4	1	1	1	1	276	32	8.75	0	1	0.01	0.851	1.181	0.809	1.503	0.94	1.392	104.2		88.7	123.1	84.3	156.6	98	145.1	Low	Not Found	Low	Low	Low	Low	Low	Low
OFAVBQ_DN219175_c4_g4_i7.p2	type:complete	(-),score=17.19,SRSF7_HUMAN	High	55.963 1.22e-34,RRM_1|PF00076.22|1.9e-15,zf-CCHC|PF00098.23|8.5e+02,zf-CCHC|PF00098.23|8.3e-06,zf-CCHC_4|PF14392.6|0.04,SET_assoc|PF11767.8|0.16 OFAVBQ_DN219175_c4_g4_i7:891-1283(-)	0.241	0	5	1	1	1	1	130	15.1	10.39	0	1																Low	Not Found	Low	Low	Low	Low	Low	Low
OFAVBQ_DN29365_c0_g1_i1.p1	type:internal	(-),score=8.18,TISB_MOUSE	High	67.241 6.64e-21,zf-CCCH|PF00642.24|3.2e-13,zf-CCCH|PF00642.24|0.35,zf_CCCH_4|PF18345.1|4.9e-07,zf_CCCH_4|PF18345.1|9.1e+03,zf-CCCH_4|PF18044.1|2.7e-06,zf-CCCH_4|PF18044.1|6.7e+02,zf-CCCH_2|PF14608.6|0.011,zf-CCCH_2|PF14608.6|1.2e+04,Torus|PF16131.5|0.15 OFAVBQ_DN29365_c0_g1_i1:1-453(-)	0.081	0	6	1	2	1	1	151	16.1	8.48	0	1																Low	Not Found	Low	Low	Low	Low	Low	Low
OFAVBQ_DN221215_c0_g2_i1.p1	type:5prime_partial	(-),score=81.47,Endonuclease_NS	High	PF01223.23 1.5e-13,ubiquitin|PF00240.23|5.2e-11,Rad60-SLD|PF11976.8|0.01 OFAVBQ_DN221215_c0_g2_i1:2028-4040(-)	0.239	0	1	1	2	1	1	670	76	7.8	0	1																Low	Low	Low	Low	Low	Low	Low	Low
OFAVBQ_DN221488_c0_g1_i2.p1			High	OFAVBQ_DN221488_c0_g1~~OFAVBQ_DN221488_c0_g1_i2.p1 ORF type:complete len:438 (-),score=56.89 OFAVBQ_DN221488_c0_g1_i2:958-2271(-)	0.237	0	3	1	1	1	1	437	49.2	9.67	0	1																Low	Not Found	Low	Low	Low	Low	Low	Low
OFAVBQ_DN216530_c1_g1_i4.p1	type:complete	(-),score=221.15,UT14B_MOUSE	High	34.630 3.00e-107,Utp14|PF04615.13|6.1e-159,RecQ_Zn_bind|PF16124.5|0.53 OFAVBQ_DN216530_c1_g1_i4:315-2600(-)	0.207	0	4	3	5	3	1	761	85.9	8.7	0	3	1.598	0.966	1.32	0.934	1.483	0.822	1.427	83.8	133.8	80.9	110.6	78.3	124.2	68.8	119.6	Low	Low	Low	Low	Low	Low	Low	Low
OFAVBQ_DN213492_c1_g2_i2.p1	type:complete	(-),score=37.83,LRC28_XENTR	High	39.789 1.03e-48,LRR_8|PF13855.6|3.5e-07,LRR_8|PF13855.6|6.3e-09,LRR_8|PF13855.6|8.3e-05,LRR_8|PF13855.6|0.013,LRR_4|PF12799.7|2.5,LRR_4|PF12799.7|0.00037,LRR_4|PF12799.7|0.0047,LRR_4|PF12799.7|0.00014,LRR_4|PF12799.7|1.6e-05,LRR_4|PF12799.7|1.6,LRR_4|PF12799.7|0.0014,LRR_4|PF12799.7|3.3e+03,LRR_1|PF00560.33|8.5e+02,LRR_1|PF00560.33|45,LRR_1|PF00560.33|2.3,LRR_1|PF00560.33|33,LRR_1|PF00560.33|2.2e…	0.082	0	4	1	2	1	1	287	32.6	8.15	0	1	0.01	1.372	1.436	1.629	1.846	1.916	2.843	66.4		91.1	95.4	108.2	122.6	127.3	188.8	Low	Not Found	Low	Low	Low	Low	Low	Low
OFAVBQ_DN224558_c1_g1_i3.p1	type:5prime_partial	(-),score=196.76,KANL2_HUMAN	High	39.944 6.68e-62,zf-C3Hc3H|PF13891.6|7.4e-15,zf-C3Hc3H|PF13891.6|3.9e+03,zf-C3Hc3H|PF13891.6|6.5e-15 OFAVBQ_DN224558_c1_g1_i3:883-3345(-)	0.081	0	1	1	1	1	1	820	87.6	8.47	0	1																Low	Not Found	Low	Low	Low	Low	Low	Low
OFAVBQ_DN210160_c0_g2_i1.p1			High	OFAVBQ_DN210160_c0_g2~~OFAVBQ_DN210160_c0_g2_i1.p1 ORF type:5prime_partial len:73 (-),score=12.77 OFAVBQ_DN210160_c0_g2_i1:398-616(-)	0.206	0	10	1	1	1	1	72	8.2	6.77	0	1	1.559	1.15	1.08	0.958	0.68	0.635	0.7	103.1	160.7	118.5	111.3	98.8	70.1	65.5	72.2	Low	Low	Low	Low	Low	Low	Low	Low
OFAVBQ_DN224744_c1_g1_i3.p2	type:complete	(-),score=24.04,AAA_7	High	PF12775.7 0.0034,AAA_7|PF12775.7|2.5e+03,Asp23|PF03780.13|0.051 OFAVBQ_DN224744_c1_g1_i3:3120-3749(-)	0.205	0	5	1	1	1	1	209	24.5	6.95	0	1																Low	Low	Low	Low	Low	Low	Low	Low
OFAVBQ_DN201364_c0_g3_i1.p1	type:complete	(-),score=76.52,CGAS_NEMVE	High	28.571 1.41e-22,Mab-21|PF03281.14|1.5e-53 OFAVBQ_DN201364_c0_g3_i1:535-2148(-)	0.081	0	1	1	4	1	1	537	62.1	9.98	0	1																Low	Not Found	Low	Low	Low	Low	Low	Low
OFAVBQ_DN213303_c2_g1_i7.p1	type:complete	(-),score=33.27,MFS11_HUMAN	High	50.916 3.14e-84,MFS_1|PF07690.16|1.8e-09,MFS_1|PF07690.16|0.078 OFAVBQ_DN213303_c2_g1_i7:1005-1889(-)	0.207	0	2	1	2	1	1	294	32.7	8.43	0	1																Low	Not Found	Low	Low	Low	Low	Low	Low
OFAVBQ_DN224228_c7_g1_i9.p1	type:complete	(-),score=59.99,MIB1_XENLA	High	30.693 6.11e-12,MIB1_XENLA|48.571|8.98e-07,MIB_HERC2|PF06701.13|3e-17,MIB_HERC2|PF06701.13|2.1e-19,VWA_3|PF13768.6|0.2,VWA_3|PF13768.6|3.3e+03 OFAVBQ_DN224228_c7_g1_i9:851-1573(-)	0.082	0	4	1	1	1	1	240	26.2	5.66	0	1																Low	Not Found	Low	Low	Low	Low	Low	Low
OFAVBQ_DN216257_c0_g1_i13.p1	type:3prime_partial	(-),score=109.17,DZIP3_MOUSE	High	29.530 8.88e-11,HEPN_DZIP3|PF18738.1|5.7e-36,Cnn_1N|PF07989.11|4.9,Cnn_1N|PF07989.11|39,Cnn_1N|PF07989.11|0.68,YabA|PF06156.13|7.3e+02,YabA|PF06156.13|0.092,TSC22|PF01166.18|31,TSC22|PF01166.18|6.5,TSC22|PF01166.18|2e+03,Jnk-SapK_ap_N|PF09744.9|0.23,Jnk-SapK_ap_N|PF09744.9|7.1e+02,DUF4763|PF15960.5|5.9e+02,DUF4763|PF15960.5|0.86,FlaC_arch|PF05377.11|18,FlaC_arch|PF05377.11|89,FlaC_arch|PF05377.11…	0.081	0	2	2	2	2	1	767	87.6	5.96	0	2																Low	Not Found	Low	Low	Low	Low	Low	Low
OFAVBQ_DN190690_c0_g1_i1.p1	type:complete	(-),score=3.60,5HT6R_PANTR	High	25.786 2.85e-14,7tm_1|PF00001.21|9.5e-24,7TM_GPCR_Srx|PF10328.9|0.037,Phage_holin_3_6|PF07332.11|6.3e+03,Phage_holin_3_6|PF07332.11|0.51 OFAVBQ_DN190690_c0_g1_i1:657-1643(-)	0.081	0	2	1	7	1	1	328	38.6	10.08	0	1	0.01	1.548	1.96	1.257	2.771	2.17	1.692	64.5		99.9	126.5	81.1	178.8	140	109.2	Low	Low	Low	Low	Low	Low	Low	Low
OFAVBQ_DN225451_c5_g1_i1.p1	type:complete	(-),score=147.38,R213A_DANRE	High	54.419 4.29e-143,R213A_DANRE|52.239|4.20e-33,AAA_7|PF12775.7|4.2e+02,AAA_7|PF12775.7|0.17,AAA_7|PF12775.7|3.6,AAA_5|PF07728.14|0.002,AAA_5|PF07728.14|6.6e+02,ABC_tran|PF00005.27|0.0022,AAA|PF00004.29|0.061,AAA|PF00004.29|1.2e+02,AAA_22|PF13401.6|0.044,AAA_22|PF13401.6|1.2e+03,Sigma54_activ_2|PF14532.6|1.3,Sigma54_activ_2|PF14532.6|1.2e+02,MCM|PF00493.23|0.086,MCM|PF00493.23|2.7e+03,AAA_14|PF13173…	0.242	0	4	2	54	2	1	762	87.2	5.85	0	2	0.943	1.301	1.028	1.27	1.726	1.517	2.199	72.8	68.7	94.8	74.9	92.5	125.7	110.5	160.2	Low	Low	Low	Low	Low	Low	Low	Low
OFAVBQ_DN200688_c4_g7_i1.p1			High	OFAVBQ_DN200688_c4_g7~~OFAVBQ_DN200688_c4_g7_i1.p1 ORF type:5prime_partial len:90 (-),score=0.91 OFAVBQ_DN200688_c4_g7_i1:50-319(-)	0.243	0	7	1	1	1	1	89	10.2	9.25	0	1																Low	Not Found	Low	Low	Low	Low	Low	Low
OFAVBQ_DN225500_c9_g1_i1.p1	type:complete	(+),score=109.85,LAMB1_HUMAN	High	24.675 7.40e-07,DUF4062|PF13271.6|0.011,Phage_GP20|PF06810.11|65,Phage_GP20|PF06810.11|0.011,Phage_GP20|PF06810.11|5.6e+02,Phage_GP20|PF06810.11|97,SMC_hinge|PF06470.13|0.76,SMC_hinge|PF06470.13|1.4e+02,MHC_I|PF00129.18|0.63,ABC_tran_CTD|PF16326.5|9.3e+02,ABC_tran_CTD|PF16326.5|0.82,ABC_tran_CTD|PF16326.5|4.8,ABC_tran_CTD|PF16326.5|10 OFAVBQ_DN225500_c9_g1_i1:675-2042(+)	0.244	0	4	2	2	2	1	455	50.8	5.34	0	2	0.948	0.605	0.666	0.718	0.575	0.65	0.492	141.5	134.1	85.6	94.3	101.7	81.4	92	69.6	Low	Low	Low	Low	Low	Low	Low	Low
OFAVBQ_DN209015_c0_g1_i13.p1	type:complete	(-),score=86.43,DDX1_CHICK	High	64.182 0.0,DEAD|PF00270.29|2.6e-39,Helicase_C|PF00271.31|4.6e-26,Fer4_12|PF13353.6|28,Fer4_12|PF13353.6|4.4e+03,Fer4_12|PF13353.6|6.9e+03,Fer4_12|PF13353.6|7.9,HTH_9|PF08221.11|1.2,HTH_9|PF08221.11|4.2e+03,HTH_9|PF08221.11|3e+03 OFAVBQ_DN209015_c0_g1_i13:671-2275(-)	0.08	0	2	1	1	1	1	534	59.7	8.69	0	1																Low	Not Found	Low	Low	Low	Not Found	Not Found	Not Found
OFAVBQ_DN211813_c1_g1_i2.p1	type:complete	(-),score=36.35,LORF2_HUMAN	High	26.590 1.91e-10,RVT_1|PF00078.27|0.0013 OFAVBQ_DN211813_c1_g1_i2:46-981(-)	0.244	0	3	1	1	1	1	311	35.4	9.07	0	1																Low	Low	Low	Low	Low	Low	Low	Low
OFAVBQ_DN59980_c0_g1_i1.p1	type:internal	(-),score=41.71,ACAC_CHICK	High	28.417 3.49e-19,ACC_central|PF08326.12|1.3e-34 OFAVBQ_DN59980_c0_g1_i1:1-840(-)	0.248	0	5	1	1	1	1	280	31.6	9.45	0	1	0.01	1.424	1.092	0.986	1.49	1.272	1.476	91.5		130.4	99.9	90.2	136.4	116.4	135.2	Low	Not Found	Low	Low	Low	Low	Low	Low
OFAVBQ_DN194862_c0_g4_i1.p1			High	OFAVBQ_DN194862_c0_g4~~OFAVBQ_DN194862_c0_g4_i1.p1 ORF type:internal len:274 (-),score=-15.55 OFAVBQ_DN194862_c0_g4_i1:3-821(-)	0.249	0	3	1	1	1	1	273	31	9.11	0	1																Low	Low	Low	Low	Low	Low	Low	Low
OFAVBQ_DN222038_c2_g1_i15.p1	type:3prime_partial	(-),score=258.05,Y1252_SULAC	High	45.556 5.98e-39,Macro|PF01661.21|3.5e-32,Macro|PF01661.21|2.6e+03,DTC|PF18102.1|8.5e-15,zf-C3HC4_3|PF13920.6|1.4e-05,zf-RING_2|PF13639.6|3.6e+02,zf-RING_2|PF13639.6|0.00011,zf-C3HC4_2|PF13923.6|2.3e+02,zf-C3HC4_2|PF13923.6|6.6e-05,zf-RING_UBOX|PF13445.6|1.1e+02,zf-RING_UBOX|PF13445.6|0.0011,zf-RING_UBOX|PF13445.6|1.6e+03,zf-RING_5|PF14634.6|2.2e+03,zf-RING_5|PF14634.6|0.00061,zf-RING_10|PF16685.5…	0.08	0	1	1	2	1	1	1285	141.8	5.73	0	1																Low	Not Found	Low	Low	Low	Low	Low	Low
OFAVBQ_DN224265_c4_g1_i1.p1	type:complete	(-),score=470.16,CO1A2_RAT	High	40.773 8.36e-151,Collagen|PF01391.18|6.4e-08,Collagen|PF01391.18|6.6e-09,Collagen|PF01391.18|1.8e+04,Collagen|PF01391.18|0.0045,Collagen|PF01391.18|1.7e-08,Collagen|PF01391.18|1.8e+04,Collagen|PF01391.18|1.8e+04,Collagen|PF01391.18|1.8e+04,Collagen|PF01391.18|4.6e-06,Collagen|PF01391.18|1e-07,Collagen|PF01391.18|1.3e-07,Collagen|PF01391.18|3.5e+03,Collagen|PF01391.18|2.4e-05,Collagen|PF01391.18|2…	0.252	0	1	2	2	2	1	1401	134.9	5.62	0	2																Low	Low	Low	Low	Low	Low	Low	Low
OFAVBQ_DN196975_c8_g1_i2.p1	type:internal	(+),score=13.86,HlyD_D4	High	PF16572.5 0.095,HlyD_D4|PF16572.5|2.6e+03 OFAVBQ_DN196975_c8_g1_i2:2-310(+)	0.238	0	20	1	1	1	1	103	11.4	10.15	0	1																Low	Not Found	Low	Low	Low	Low	Low	Low
OFAVBQ_DN131666_c1_g2_i1.p1	type:internal	(-),score=4.85,zf-CCCH	High	PF00642.24 3.5e+03,zf-CCCH|PF00642.24|0.04,zf-CCCH_2|PF14608.6|1.1e+04,zf-CCCH_2|PF14608.6|0.75,zf-CCCH_2|PF14608.6|3.8e+02 OFAVBQ_DN131666_c1_g2_i1:2-283(-)	0.08	0	15	1	1	1	1	94	10.6	8.22	0	1																Not Found	Not Found	Not Found	Low	Low	Not Found	Not Found	Not Found
OFAVBQ_DN232255_c0_g1_i1.p1	type:internal	(-),score=7.06,Lipoprotein_17	High	PF04200.12 0.01 OFAVBQ_DN232255_c0_g1_i1:2-247(-)	0.236	0	17	1	1	1	1	82	9.2	9.76	0	1																Not Found	Not Found	Low	Low	Low	Not Found	Not Found	Low
OFAVBQ_DN215076_c4_g3_i3.p1	type:complete	(-),score=61.98,YqzH	High	PF14164.6 0.32,TPR_2|PF07719.17|1.2e+04,TPR_2|PF07719.17|5e+02,TPR_2|PF07719.17|1.8e+04,TPR_2|PF07719.17|7.1 OFAVBQ_DN215076_c4_g3_i3:1399-3543(-)	0.082	0	3	2	2	2	1	714	81	7.8	0	2																Low	Not Found	Low	Low	Low	Low	Low	Low
OFAVBQ_DN223600_c0_g1_i1.p1			High	OFAVBQ_DN223600_c0_g1~~OFAVBQ_DN223600_c0_g1_i1.p1 ORF type:complete len:75 (+),score=13.39 OFAVBQ_DN223600_c0_g1_i1:131-355(+)	0.204	0	20	1	1	1	1	74	8.7	7.43	0	1	0.01	1.393	1.42	1.833	2.158	2.034	1.845	68.5		95.4	97.2	125.5	147.8	139.3	126.3	Low	Not Found	Low	Low	Low	Low	Low	Low
OFAVBQ_DN221580_c1_g1_i3.p1	type:complete	(-),score=311.89,KI16B_HUMAN	High	49.510 0.0,Kinesin|PF00225.23|1.6e-110,Kinesin|PF00225.23|2.4e+03,Kinesin|PF00225.23|1.8e+04,Microtub_bd|PF16796.5|9.3e-26,Microtub_bd|PF16796.5|7.9e+03,Microtub_bd|PF16796.5|1.7e+03,Kinesin_assoc|PF16183.5|0.00036,Kinesin_assoc|PF16183.5|4.5e-05,Kinesin_assoc|PF16183.5|1.8e+04,Kinesin_assoc|PF16183.5|1.8e+04,Kinesin_assoc|PF16183.5|1.1e+04,FHA|PF00498.26|2.6e+03,FHA|PF00498.26|7.3e-06,Yop-YscD_c…	0.2	0	1	1	2	1	1	1240	143.6	5.41	0	1																Low	Low	Low	Low	Low	Low	Low	Low
OFAVBQ_DN220036_c5_g1_i1.p1	type:complete	(-),score=220.89,UBE4A_RAT	High	40.633 0.0,Ufd2P_core|PF10408.9|1.2e-164,U-box|PF04564.15|2.4e-24,zf-Nse|PF11789.8|1e+03,zf-Nse|PF11789.8|1.4 OFAVBQ_DN220036_c5_g1_i1:1149-4355(-)	0.078	0	1	1	1	1	1	1068	121.5	6.4	0	1																Low	Not Found	Low	Low	Low	Not Found	Low	Low
OFAVBQ_DN218847_c0_g2_i2.p1	type:complete	(-),score=97.53,SHLD2_MOUSE	High	27.888 7.53e-45,FAM35_C|PF15793.5|3.2e-20,REPA_OB_2|PF16900.5|0.039,REPA_OB_2|PF16900.5|26 OFAVBQ_DN218847_c0_g2_i2:549-2777(-)	0.269	0	4	4	7	4	1	742	83	6.58	0	4																Low	Low	Low	Low	Low	Low	Low	Low
OFAVBQ_DN223556_c6_g1_i1.p1	type:complete	(-),score=185.31,DDX42_XENLA	High	60.053 0.0,DEAD|PF00270.29|1.8e-48,Helicase_C|PF00271.31|2.7e+03,Helicase_C|PF00271.31|7.5e+03,Helicase_C|PF00271.31|6.2e-27,ERCC3_RAD25_C|PF16203.5|0.011,DUF2362|PF10154.9|0.29 OFAVBQ_DN223556_c6_g1_i1:1354-3684(-)	0.258	0	2	2	2	2	1	776	85.9	6.74	0	2																Low	Low	Low	Low	Low	Low	Low	Low
OFAVBQ_DN218750_c0_g2_i10.p2			High	OFAVBQ_DN218750_c0_g2~~OFAVBQ_DN218750_c0_g2_i10.p2 ORF type:complete len:123 (+),score=13.40 OFAVBQ_DN218750_c0_g2_i10:1791-2159(+)	0.255	0	8	1	1	1	1	122	13.7	9.14	0	1																Low	Low	Low	Low	Low	Low	Low	Low
OFAVBQ_DN200440_c1_g2_i1.p1			High	OFAVBQ_DN200440_c1_g2~~OFAVBQ_DN200440_c1_g2_i1.p1 ORF type:5prime_partial len:102 (-),score=20.20 OFAVBQ_DN200440_c1_g2_i1:213-518(-)	0.265	0	9	1	1	1	1	101	11	5.12	0	1																Low	Low	Low	Low	Low	Low	Low	Low
OFAVBQ_DN204672_c5_g2_i1.p1	type:complete	(-),score=20.56,Histone	High	PF00125.24 0.0065,Herpes_BLRF2|PF05812.12|0.1 OFAVBQ_DN204672_c5_g2_i1:119-439(-)	0.315	0	6	1	2	1	1	106	11.9	5.12	0	1																Low	Low	Low	Low	Low	Low	Low	Low
OFAVBQ_DN217965_c0_g1_i5.p1	type:complete	(-),score=19.25,ABHDB_HUMAN	High	38.614 4.94e-14,Abhydrolase_1|PF00561.20|1.4e-06,Hydrolase_4|PF12146.8|6.8e-05,PGAP1|PF07819.13|0.00033,Ndr|PF03096.14|0.0011,Esterase|PF00756.20|0.012,Chlorophyllase|PF07224.11|0.015,PAF-AH_p_II|PF03403.13|0.03,Chlorophyllase2|PF12740.7|0.034,Abhydrolase_6|PF12697.7|0.041,LCAT|PF02450.15|0.071 OFAVBQ_DN217965_c0_g1_i5:3127-3462(-)	0.079	0	10	1	1	1	1	111	12.4	6.52	0	1																Not Found	Not Found	Not Found	Not Found	Low	Not Found	Low	Not Found
OFAVBQ_DN222720_c2_g1_i3.p1	type:internal	(-),score=104.92,SPG16_HUMAN	High	49.559 2.03e-152,WD40|PF00400.32|0.1,WD40|PF00400.32|5.3e-07,WD40|PF00400.32|2.7e-06,WD40|PF00400.32|6.2,ANAPC4_WD40|PF12894.7|27,ANAPC4_WD40|PF12894.7|0.29,ANAPC4_WD40|PF12894.7|0.026,ERM|PF00769.19|0.0013,FapA|PF03961.13|0.04,Cep57_CLD_2|PF14197.6|33,Cep57_CLD_2|PF14197.6|0.77,Ge1_WD40|PF16529.5|1.1,Ge1_WD40|PF16529.5|82,Fib_alpha|PF08702.10|0.53,KASH_CCD|PF14662.6|6.9e+03,KASH_CCD|PF14662.6|0.…	0.31	0	2	1	1	1	1	449	51	6.54	0	1																Low	Not Found	Low	Low	Low	Low	Low	Low
OFAVBQ_DN268871_c0_g1_i1.p1	type:internal	(-),score=26.59,RL72_PARTE	High	39.785 8.71e-12,Ribosomal_L30_N|PF08079.12|9.7e-13,DUF3486|PF11985.8|0.049,DUF1151|PF06625.11|0.1 OFAVBQ_DN268871_c0_g1_i1:1-294(-)	0.079	0	7	1	1	1	1	98	11.1	9.63	0	1																Not Found	Not Found	Not Found	Not Found	Not Found	Not Found	Not Found	Not Found
OFAVBQ_DN215981_c3_g1_i3.p1	type:complete	(-),score=61.45,RN215_MOUSE	High	37.805 1.19e-42,zf-RING_2|PF13639.6|9.3e+03,zf-RING_2|PF13639.6|1.5e-11,zf-C3HC4_2|PF13923.6|1.6e-08,zf-RING_11|PF17123.5|2.3e-08,zf-C3HC4|PF00097.25|1.4e-07,zf-rbx1|PF12678.7|4e-06,zf-C3HC4_3|PF13920.6|8.1e+03,zf-C3HC4_3|PF13920.6|5.2e-05,ZNRF_3_ecto|PF18212.1|0.00035,ZNRF_3_ecto|PF18212.1|9.6e+03,zf-RING_UBOX|PF13445.6|0.00075,zf-RING_5|PF14634.6|0.0014,zf-ANAPC11|PF12861.7|0.0066,UDPG_MGDP_dh_…	0.29	0	2	1	1	1	1	419	47.6	8.34	0	1																Low	Not Found	Low	Low	Low	Low	Low	Low
OFAVBQ_DN215585_c0_g1_i1.p1	type:complete	(-),score=16.64,MC5R_PANTR	High	28.369 5.18e-26,7tm_1|PF00001.21|1.8e-37,7TM_GPCR_Srx|PF10328.9|2.4e+02,7TM_GPCR_Srx|PF10328.9|1e-07,7TM_GPCR_Srx|PF10328.9|1.7,7tm_4|PF13853.6|3.1e-06,7tm_4|PF13853.6|11,Endonuc-BsobI|PF09194.10|1e+03,Endonuc-BsobI|PF09194.10|0.43,Cortexin|PF11057.8|4.4e+03,Cortexin|PF11057.8|6.9e+02,Cortexin|PF11057.8|0.18,DUF1980|PF09323.10|2.3e+03,DUF1980|PF09323.10|0.1 OFAVBQ_DN215585_c0_g1_i1:1096-2070(-)	0.295	0	3	1	1	1	1	324	36.5	8.38	0	1																Low	Not Found	Low	Low	Low	Low	Low	Low
OFAVBQ_DN212169_c0_g2_i2.p1	type:complete	(-),score=77.60,LOXL2_MOUSE	High	37.100 2.09e-101,SRCR|PF00530.18|4.7e-30,SRCR|PF00530.18|1.1e-17,SRCR|PF00530.18|5.4e-29,SRCR|PF00530.18|2e-24,SRCR_2|PF15494.6|3.3e-05,SRCR_2|PF15494.6|7.9e-06,SRCR_2|PF15494.6|0.00027,SRCR_2|PF15494.6|0.0025,Hepsin-SRCR|PF09272.10|0.004,Hepsin-SRCR|PF09272.10|0.0078,Hepsin-SRCR|PF09272.10|0.4,Hepsin-SRCR|PF09272.10|1.4e+02,Lysyl_oxidase|PF01186.17|0.012,Antimicrobial_2|PF08023.12|2.7e+03,Antimi…	0.077	0	6	3	5	3	1	526	59	7.2	0	3																Low	Low	Low	Low	Low	Low	Low	Low
OFAVBQ_DN223124_c1_g1_i3.p1	type:complete	(-),score=419.42,HYD_DROME	High	24.590 8.66e-17,HYD_DROME|27.807|1.06e-11,RRM_1|PF00076.22|4.6,RRM_1|PF00076.22|88,RE_NgoPII|PF09521.10|0.14 OFAVBQ_DN223124_c1_g1_i3:1995-9509(-)	0.222	0	0	1	1	1	1	2504	272.5	6.9	0	1																Low	Low	Low	Low	Low	Low	Low	Low
OFAVBQ_DN182295_c0_g1_i1.p1	type:3prime_partial	(-),score=29.14,BP10_PARLI	High	43.902 3.27e-57,Astacin|PF01400.24|2.3e-67,Peptidase_M10|PF00413.24|16,Peptidase_M10|PF00413.24|0.048,ACCA|PF03255.14|0.0026,ACCA|PF03255.14|1.8e+03,Reprolysin_4|PF13583.6|0.13,Reprolysin_3|PF13582.6|0.25 OFAVBQ_DN182295_c0_g1_i1:2-796(-)	0.211	0	8	1	1	1	1	265	30.4	8.9	0	1																Low	Low	Low	Low	Low	Low	Low	Low
OFAVBQ_DN218045_c1_g2_i1.p1	type:internal	(-),score=32.58,AGO4_XENLA	High	44.615 1.72e-37,ArgoN|PF16486.5|9.5e-24,ArgoL1|PF08699.10|7.9e-11 OFAVBQ_DN218045_c1_g2_i1:3-572(-)	0.077	0	5	1	1	1	1	190	21.6	7.91	0	1																Low	Low	Low	Low	Low	Low	Low	Low
OFAVBQ_DN198499_c0_g1_i7.p1	type:internal	(-),score=57.84,SACS_HUMAN	High	30.260 7.75e-48,SACS_HUMAN|32.292|4.51e-08 OFAVBQ_DN198499_c0_g1_i7:2-1243(-)	0.08	0	2	1	2	1	1	414	47.1	7.62	0	1																Low	Low	Low	Low	Low	Low	Low	Low
OFAVBQ_DN329023_c0_g1_i1.p1	type:internal	(+),score=19.64,DUF1758	High	PF05585.12 3e-10,Asp_protease_2|PF13650.6|0.0015,zf-CCHC|PF00098.23|0.044,zf-CCHC|PF00098.23|1.7e+02,gag-asp_proteas|PF13975.6|0.23 OFAVBQ_DN329023_c0_g1_i1:3-599(+)	0.078	0	4	1	1	1	1	199	21.8	8.31	0	1																Low	Not Found	Low	Low	Low	Low	Low	Low
OFAVBQ_DN214786_c9_g1_i1.p1			High	OFAVBQ_DN214786_c9_g1~~OFAVBQ_DN214786_c9_g1_i1.p1 ORF type:complete len:84 (-),score=13.97 OFAVBQ_DN214786_c9_g1_i1:347-598(-)	0.078	0	28	1	2	1	1	83	9.2	9	0	1	0.715	0.622	1.329	0.935	1.753	0.883	1.181	95	68	59.1	126.3	88.9	166.6	84	112.2	Low	Low	Low	Low	Low	Low	Low	Low
OFAVBQ_DN148410_c0_g1_i1.p1			High	OFAVBQ_DN148410_c0_g1~~OFAVBQ_DN148410_c0_g1_i1.p1 ORF type:complete len:80 (+),score=2.83 OFAVBQ_DN148410_c0_g1_i1:206-445(+)	0.211	0	28	1	2	1	1	79	9.1	9.63	0	1																Not Found	Not Found	Not Found	Not Found	Not Found	Not Found	Not Found	Not Found
OFAVBQ_DN211921_c2_g3_i4.p1	type:complete	(-),score=71.36,TPR_12	High	PF13424.6 0.089,TPR_12|PF13424.6|1.8e-08,TPR_10|PF13374.6|0.0098,TPR_10|PF13374.6|0.0045,TPR_8|PF13181.6|0.00047,TPR_8|PF13181.6|0.44,TPR_8|PF13181.6|3.5e+03,TPR_7|PF13176.6|9.4e-05,TPR_7|PF13176.6|20,TPR_1|PF00515.28|0.018,TPR_1|PF00515.28|0.022,TPR_1|PF00515.28|6.2e+03,TPR_2|PF07719.17|0.043,TPR_2|PF07719.17|0.4,TPR_2|PF07719.17|1.7e+03,Uso1_p115_head|PF04869.14|0.11,FGF-BP1|PF06473.12|2.3,FGF-…	0.212	0	2	1	1	1	1	323	35.9	5.44	0	1																Low	Low	Low	Low	Low	Low	Low	Low
OFAVBQ_DN220312_c1_g1_i4.p1	type:complete	(-),score=463.87,ANR17_HUMAN	High	71.365 0.0,ANR17_HUMAN|76.497|0.0,ANR17_HUMAN|37.903|2.68e-55,ANR17_HUMAN|37.815|6.61e-55,ANR17_HUMAN|37.330|1.10e-54,ANR17_HUMAN|37.126|1.52e-47,ANR17_HUMAN|35.952|2.39e-47,ANR17_HUMAN|37.847|2.45e-41,ANR17_HUMAN|36.918|1.54e-37,ANR17_HUMAN|35.333|7.52e-36,ANR17_HUMAN|57.031|1.71e-34,ANR17_HUMAN|33.788|4.99e-33,ANR17_HUMAN|38.115|1.35e-32,ANR17_HUMAN|30.645|2.18e-12,Ank_2|PF12796.7|4.9e-13,Ank_2…	0.214	0	0	1	1	1	1	2134	223.9	5.97	0	1																Low	Not Found	Low	Low	Low	Low	Low	Low
OFAVBQ_DN204854_c1_g1_i5.p1	type:5prime_partial	(-),score=3.92,PIMT_DROME	High	37.179 2.39e-08,PCMT|PF01135.19|0.0015 OFAVBQ_DN204854_c1_g1_i5:2620-2928(-)	0.078	0	6	1	1	1	1	102	11.9	8.65	0	1	0.01	0.955	0.877	0.873	0.516	0.809	0.549	143.4		136.9	125.8	125.2	74	116	78.7	Low	Not Found	Low	Low	Low	Low	Low	Low
OFAVBQ_DN223682_c2_g1_i1.p1	type:internal	(+),score=23.19,Gpi16	High	PF04113.14 0.081 OFAVBQ_DN223682_c2_g1_i1:3-305(+)	0.078	0	7	1	1	1	1	101	11	4.78	0	1																Low	Not Found	Low	Low	Low	Low	Low	Low
OFAVBQ_DN220766_c5_g1_i1.p2			High	OFAVBQ_DN220766_c5_g1~~OFAVBQ_DN220766_c5_g1_i1.p2 ORF type:5prime_partial len:85 (+),score=14.62 OFAVBQ_DN220766_c5_g1_i1:3-257(+)	0.078	0	11	1	1	1	1	84	9.8	9.41	0	1																Low	Low	Low	Low	Low	Low	Low	Low
OFAVBQ_DN223135_c1_g5_i3.p1	type:complete	(-),score=627.34,NU301_DROME	High	42.857 3.53e-87,NU301_DROME|38.126|1.44e-85,NU301_DROME|38.614|2.11e-40,NU301_DROME|32.323|3.99e-20,PHD|PF00628.29|1.3e-05,PHD|PF00628.29|3.4e-09,PHD|PF00628.29|7.1e-09,Bromodomain|PF00439.25|3.1e-23,DDT|PF02791.17|4.2e-13,WHIM1|PF15612.6|6.2e-05,WSD|PF15613.6|0.00011,WSD|PF15613.6|1.8e+04,WSD|PF15613.6|1.2e+03,PHD_2|PF13831.6|9,PHD_2|PF13831.6|0.074,PHD_2|PF13831.6|0.6,AT_hook|PF02178.19|0.34 OF…	0.216	0	1	4	5	4	1	3238	348.4	6.24	0	4																Low	Low	Low	Low	Low	Low	Low	Low
OFAVBQ_DN222498_c0_g1_i1.p1	type:complete	(-),score=241.40,RBM19_HUMAN	High	45.031 0.0,RRM_1|PF00076.22|4.2e-13,RRM_1|PF00076.22|3.2e-09,RRM_1|PF00076.22|1e-15,RRM_1|PF00076.22|1.5e-09,RRM_1|PF00076.22|2.7e-18,RRM_1|PF00076.22|1.7e-13,RRM_occluded|PF16842.5|2.4,RRM_occluded|PF16842.5|34,RRM_occluded|PF16842.5|0.65,RRM_occluded|PF16842.5|80,RRM_7|PF16367.5|6.9e+03,RRM_7|PF16367.5|6.2e+02,RRM_7|PF16367.5|1.5e+03,RRM_7|PF16367.5|0.022,RRM_7|PF16367.5|5.6,RRM_5|PF13893.6|57,…	0.217	0	2	1	1	1	1	939	105.6	6.24	0	1																Not Found	Not Found	Not Found	Not Found	Not Found	Not Found	Not Found	Not Found
OFAVBQ_DN185460_c0_g2_i1.p1	type:5prime_partial	(-),score=121.07,MLRP2_ACRMI	High	32.873 9.04e-91,MLRP2_ACRMI|30.572|2.25e-80,MLRP2_ACRMI|31.187|7.26e-80,MLRP2_ACRMI|28.536|2.10e-77,MLRP2_ACRMI|29.975|2.51e-77,MLRP2_ACRMI|28.105|2.31e-73,MLRP2_ACRMI|29.126|1.11e-72,MLRP2_ACRMI|34.715|2.07e-72,MLRP2_ACRMI|30.025|2.38e-72,MLRP2_ACRMI|28.894|2.07e-68,MLRP2_ACRMI|28.128|9.75e-63,MLRP2_ACRMI|27.830|5.52e-62,MLRP2_ACRMI|26.851|2.06e-60,MLRP2_ACRMI|27.086|2.21e-56,MLRP2_ACRMI|28.792|…	0.078	0	1	1	2	1	1	760	85	5.87	0	1	1.274	0.928	1.128	1.221	1.575	1.02	1.027	87.2	111.1	80.9	98.4	106.5	137.4	89	89.6	Low	Low	Low	Low	Low	Low	Low	Low
OFAVBQ_DN224181_c3_g1_i2.p1	type:complete	(-),score=54.36,ASTRB_HUMAN	High	53.333 1.25e-32,GRAM|PF02893.20|1e-18,GRAM|PF02893.20|4.2e+03 OFAVBQ_DN224181_c3_g1_i2:2057-3382(-)	0.219	0	2	1	1	1	1	441	50.2	4.89	0	1																Low	Low	Low	Low	Low	Low	Low	Low
OFAVBQ_DN215238_c2_g1_i3.p2	type:complete	(-),score=94.41,TONSL_HUMAN	High	37.624 3.01e-10,Ank_5|PF13857.6|3.4e-11,Ank|PF00023.30|6.3e-09,Ank|PF00023.30|34,Ank_4|PF13637.6|8.4e-10,Ank_4|PF13637.6|2e+03,Ank_2|PF12796.7|2.6e-08,Nop14|PF04147.12|6.4e-05,Ank_3|PF13606.6|0.00019,cwf18|PF08315.12|0.44 OFAVBQ_DN215238_c2_g1_i3:2971-4329(-)	0.079	0	3	2	2	2	1	452	49	6.33	0	2	1.009	0.578	0.969	0.906	0.555	0.967	0.376	125.8	127	72.7	121.9	113.9	69.8	121.6	47.3	Low	Low	Low	Low	Low	Low	Low	Low
OFAVBQ_DN155610_c0_g1_i1.p1	type:complete	(+),score=44.65,ZMYM2_PONAB	High	25.561 8.73e-06,DUF3504|PF12012.8|1.9e-22,DUF3504|PF12012.8|7.6e+03,Phage_integrase|PF00589.22|2.8e+03,Phage_integrase|PF00589.22|3.1e-07,DUF3435|PF11917.8|0.0072 OFAVBQ_DN155610_c0_g1_i1:474-1532(+)	0.198	0	3	1	4	1	1	352	39.6	9.61	0	1																Low	Low	Low	Low	Low	Low	Low	Low
OFAVBQ_DN204970_c7_g2_i1.p1	type:internal	(+),score=28.30,CCD25_DANRE	High	57.971 6.10e-06,DUF1631|PF07793.11|0.11,Allexi_40kDa|PF05549.11|0.3,APG6_N|PF17675.1|0.91,DUF1764|PF08576.10|2.4,YabA|PF06156.13|2.4,Peptidase_S49_N|PF08496.10|11 OFAVBQ_DN204970_c7_g2_i1:1-207(+)	0.2	0	9	1	1	1	1	69	8.5	9.6	0	1																Low	Low	Low	Low	Low	Low	Low	Low
OFAVBQ_DN221376_c0_g1_i3.p1	type:complete	(-),score=215.13,MYO1C_CHICK	High	56.039 0.0,Myosin_head|PF00063.21|3.1e-256,Myosin_TH1|PF06017.13|3.9e-31,AAA_16|PF13191.6|0.04,AAA_16|PF13191.6|5e+03,Zeta_toxin|PF06414.12|0.05,AAA_22|PF13401.6|1.2e+04,AAA_22|PF13401.6|0.56,AAA_22|PF13401.6|7.2e+03,IQ|PF00612.27|0.18,IQ|PF00612.27|29,IQ|PF00612.27|6.9e+02 OFAVBQ_DN221376_c0_g1_i3:1869-4961(-)	0.078	0	1	2	2	2	1	1030	118	8.75	0	2																Low	Low	Low	Low	Low	Low	Low	Low
OFAVBQ_DN211975_c1_g1_i1.p1			High	OFAVBQ_DN211975_c1_g1~~OFAVBQ_DN211975_c1_g1_i1.p1 ORF type:5prime_partial len:71 (-),score=13.10 OFAVBQ_DN211975_c1_g1_i1:97-309(-)	0.224	0	13	1	6	1	1	70	8.3	5.39	0	1																Low	Low	Low	Low	Low	Low	Low	Low
OFAVBQ_DN222693_c1_g1_i3.p1			High	OFAVBQ_DN222693_c1_g1~~OFAVBQ_DN222693_c1_g1_i3.p1 ORF type:5prime_partial len:279 (+),score=45.93 OFAVBQ_DN222693_c1_g1_i3:1-837(+)	0.08	0	4	1	1	1	1	278	31	9.03	0	1																Low	Not Found	Low	Low	Low	Low	Low	Low
OFAVBQ_DN220112_c3_g1_i3.p1	type:complete	(-),score=134.67,CUL5_RAT	High	76.935 0.0,Cullin|PF00888.22|1.2e-164,Cullin_Nedd8|PF10557.9|1.4e-18,Stork_head|PF10264.9|1.2e+04,Stork_head|PF10264.9|0.11 OFAVBQ_DN220112_c3_g1_i3:1213-3150(-)	0.218	0	2	2	18	2	1	645	74.4	8.05	0	2																Low	Low	Low	Low	Low	Low	Low	Low
OFAVBQ_DN217847_c1_g3_i1.p1	type:5prime_partial	(-),score=16.54,DUF749	High	PF05370.11 0.15,Adeno_E3B|PF03376.14|6e+03,Adeno_E3B|PF03376.14|1.8e+03,Adeno_E3B|PF03376.14|0.097 OFAVBQ_DN217847_c1_g3_i1:172-1077(-)	0.247	0	6	1	5	1	1	301	34.3	8.38	0	1	0.01	1.147	1.784	1.433	2.573	1.382	1.73	72.4		83	129.2	103.8	186.3	100.1	125.3	Low	Not Found	Low	Low	Low	Low	Low	Low
OFAVBQ_DN211194_c2_g2_i3.p2	type:complete	(-),score=16.52,HTH_8	High	PF02954.19 0.0058,HTH_23|PF13384.6|0.032,HTH_AsnC-type|PF13404.6|0.06,HTH_AraC|PF00165.23|0.24 OFAVBQ_DN211194_c2_g2_i3:1673-2041(-)	0.255	0	7	1	1	1	1	122	13.8	9.7	0	1																Low	Not Found	Low	Low	Low	Low	Low	Low
OFAVBQ_DN209622_c2_g1_i1.p1	type:complete	(-),score=24.94,NUD15_MOUSE	High	58.209 2.57e-50,NUDIX|PF00293.28|1.3e-14 OFAVBQ_DN209622_c2_g1_i1:2557-3057(-)	0.245	0	5	1	1	1	1	166	18.7	5.35	0	1																Low	Not Found	Low	Low	Low	Not Found	Low	Low
OFAVBQ_DN213887_c6_g1_i5.p1	type:complete	(-),score=52.12,DLP1_HUMAN	High	41.279 1.17e-83,polyprenyl_synt|PF00348.17|2.8e-25,Zincin_2|PF10103.9|0.24 OFAVBQ_DN213887_c6_g1_i5:146-1366(-)	0.284	0	1	1	1	1	1	406	45.7	6.34	0	1																Low	Not Found	Low	Low	Low	Low	Low	Low
OFAVBQ_DN119192_c0_g1_i1.p2	type:internal	(-),score=17.30,hnRNP_Q_AcD	High	PF18360.1 20,hnRNP_Q_AcD|PF18360.1|3.2e-12 OFAVBQ_DN119192_c0_g1_i1:1-270(-)	0.289	0	20	1	2	1	1	90	10	7.99	0	1																Not Found	Not Found	Low	Low	Low	Low	Low	Low
OFAVBQ_DN221033_c1_g2_i1.p1	type:3prime_partial	(-),score=30.54,DUF885	High	PF05960.11 7.7e-16,Myb_DNA-bind_4|PF13837.6|0.0041,DUF5381|PF17353.2|0.2 OFAVBQ_DN221033_c1_g2_i1:3-569(-)	0.291	0	3	1	1	1	1	189	21.4	5.36	0	1																Low	Low	Low	Low	Low	Low	Low	Low
OFAVBQ_DN210120_c3_g1_i7.p1	type:complete	(-),score=31.71,PPAL_MOUSE	High	36.199 1.10e-39,His_Phos_2|PF00328.22|9.3e-08,SCA7|PF08313.12|0.23,tRNA_synt_1c_R1|PF04558.15|1.6e+03,tRNA_synt_1c_R1|PF04558.15|0.34 OFAVBQ_DN210120_c3_g1_i7:674-1474(-)	0.245	0	5	1	1	1	1	266	30.2	7.64	0	1																Low	Not Found	Not Found	Low	Not Found	Not Found	Not Found	Not Found
OFAVBQ_DN173476_c0_g2_i1.p1			High	OFAVBQ_DN173476_c0_g2~~OFAVBQ_DN173476_c0_g2_i1.p1 ORF type:complete len:75 (+),score=0.57 OFAVBQ_DN173476_c0_g2_i1:552-776(+)	0.241	0	8	1	1	1	1	74	8.5	9.99	0	1																Low	Low	Low	Low	Low	Low	Low	Low
OFAVBQ_DN224696_c3_g1_i1.p1	type:complete	(-),score=233.56,CHSTB_RAT	High	40.164 1.01e-43,Sulfotransfer_2|PF03567.14|9.4e+03,Sulfotransfer_2|PF03567.14|7.2e+03,Sulfotransfer_2|PF03567.14|6.4e-44 OFAVBQ_DN224696_c3_g1_i1:699-3791(-)	0.239	0	2	2	3	2	1	1030	119.6	5.24	0	2																Low	Low	Low	Low	Low	Low	Low	Low
OFAVBQ_DN203134_c2_g1_i2.p1	type:complete	(-),score=-8.95,ADRB2_PIG	High	27.879 2.36e-20,7tm_1|PF00001.21|8.8e-23,7TM_GPCR_Srx|PF10328.9|1.9e-07,7TM_GPCR_Srx|PF10328.9|1.2e+02,7TM_GPCR_Srsx|PF10320.9|1e-06,7tm_4|PF13853.6|0.00061 OFAVBQ_DN203134_c2_g1_i2:395-1327(-)	0.238	0	4	1	1	1	1	310	35.3	9.76	0	1	1.087	1.449	0.842	1.473	1.5	1.28	2.067	74.8	81.3	108.3	63	110.1	112.2	95.7	154.6	Low	Low	Low	Low	Low	Low	Low	Low
OFAVBQ_DN223548_c2_g1_i1.p1	type:complete	(-),score=411.56,K2012_BOVIN	High	30.924 1.53e-10 OFAVBQ_DN223548_c2_g1_i1:1040-5875(-)	0.279	0	2	1	1	1	1	1611	181.9	5.81	0	1																Low	Not Found	Low	Low	Low	Low	Low	Low
OFAVBQ_DN216288_c0_g1_i8.p3	type:complete	(-),score=20.64,Death	High	PF00531.22 2.2e-13,Lambda_CIII|PF02061.16|0.019,Frigida|PF07899.11|1.8e+02,Frigida|PF07899.11|0.12,PG_binding_4|PF12229.8|5.4e+02,PG_binding_4|PF12229.8|0.24 OFAVBQ_DN216288_c0_g1_i8:3355-3669(-)	0.292	0	8	1	11	1	1	104	11.7	9.41	0	1																Low	Not Found	Low	Low	Low	Low	Low	Low
OFAVBQ_DN224541_c4_g2_i1.p1	type:complete	(-),score=702.31,PKD1_HUMAN	High	23.597 9.64e-103,PKD1_HUMAN|23.739|1.15e-26,PKD1_HUMAN|22.497|3.20e-21,PKD1_HUMAN|22.765|3.63e-20,PKD1_HUMAN|19.631|4.26e-11,PKD_channel|PF08016.12|1.7e-106,REJ|PF02010.15|3.1e+03,REJ|PF02010.15|1.4e+02,REJ|PF02010.15|8.4e-79,PKD|PF00801.20|82,PKD|PF00801.20|1.7e+02,PKD|PF00801.20|6.1e-09,PKD|PF00801.20|1.7e+02,PKD|PF00801.20|1.6e-05,PKD|PF00801.20|0.046,PKD|PF00801.20|1.4e-06,PKD|PF00801.20|8.9e…	0.298	0	1	5	10	5	1	4544	504.6	6.04	0	5	0.643	0.864	0.885	1.462	1.468	1.208	1.74	86.3	55.5	74.6	76.4	126.2	126.7	104.3	150.2	Low	Low	Low	Low	Low	Low	Low	Low
OFAVBQ_DN213507_c4_g2_i1.p1			High	OFAVBQ_DN213507_c4_g2~~OFAVBQ_DN213507_c4_g2_i1.p1 ORF type:5prime_partial len:85 (-),score=4.17 OFAVBQ_DN213507_c4_g2_i1:714-968(-)	0.21	0	7	1	2	1	1	84	9.4	9.92	0	1																Low	Low	Low	Low	Low	Low	Low	Low
OFAVBQ_DN222710_c2_g1_i4.p1	type:complete	(-),score=261.74,ARIP4_XENTR	High	50.460 0.0,ARIP4_XENTR|46.429|1.88e-99,SNF2_N|PF00176.23|2.4e-48,Helicase_C|PF00271.31|2.7e-14,ResIII|PF04851.15|1.9e-05,ERCC3_RAD25_C|PF16203.5|20,ERCC3_RAD25_C|PF16203.5|2.5,WRNPLPNID|PF15017.6|2.5e+02,WRNPLPNID|PF15017.6|5.4,eIF3_subunit|PF08597.10|0.075,eIF3_subunit|PF08597.10|1.8e+04 OFAVBQ_DN222710_c2_g1_i4:2749-6729(-)	0.209	0	1	1	1	1	1	1326	146.5	5.97	0	1																Low	Low	Low	Low	Low	Low	Low	Low
OFAVBQ_DN302397_c0_g1_i1.p1	type:internal	(-),score=17.58,SRSF1_XENTR	High	76.316 5.20e-33,RRM_1|PF00076.22|3.6e-19,RRM_3|PF08777.11|0.0017,RRM_occluded|PF16842.5|0.0059,RRM_7|PF16367.5|0.0073 OFAVBQ_DN302397_c0_g1_i1:2-322(-)	0.221	0	9	1	2	1	1	107	11.8	9.54	0	1																Low	Not Found	Low	Low	Low	Low	Low	Low
OFAVBQ_DN224244_c3_g1_i7.p1	type:complete	(-),score=176.27,S11IP_MOUSE	High	38.889 9.99e-18,S11IP_MOUSE|37.168|2.18e-07,DEP|PF00610.21|1.4e-20,Zn-ribbon_8|PF09723.10|0.028,HypA|PF01155.19|0.037,TF_Zn_Ribbon|PF08271.12|0.054,A2L_zn_ribbon|PF08792.10|2.5e+02,A2L_zn_ribbon|PF08792.10|2.7,Prok-RING_1|PF14446.6|0.42,zinc-ribbons_6|PF07191.12|0.48 OFAVBQ_DN224244_c3_g1_i7:604-3474(-)	0.202	0	2	3	5	3	1	956	106.2	5.9	0	3																Low	Low	Low	Low	Low	Low	Low	Low
OFAVBQ_DN277006_c0_g1_i1.p1	type:5prime_partial	(-),score=16.40,DUF525	High	PF04379.14 0.12 OFAVBQ_DN277006_c0_g1_i1:8-253(-)	0.201	0	12	1	1	1	1	81	9.2	8.73	0	1																Low	Not Found	Low	Not Found	Low	Low	Low	Low
OFAVBQ_DN224259_c3_g2_i4.p1	type:complete	(-),score=318.18,ZNFX1_MOUSE	High	37.683 0.0,AAA_12|PF13087.6|6.8e-41,AAA_12|PF13087.6|4.3e+02,AAA_11|PF13086.6|3.6e+03,AAA_11|PF13086.6|5.7e-14,AAA_11|PF13086.6|4.4e-12,AAA_11|PF13086.6|8.5e+03,AAA_11|PF13086.6|2.2e+03,AAA_19|PF13245.6|7e-08,AAA_30|PF13604.6|0.00072,AAA_30|PF13604.6|2.1,DUF2075|PF09848.9|5.4e+03,DUF2075|PF09848.9|0.0011,DUF2075|PF09848.9|1.6,AAA_22|PF13401.6|0.054,AAA_22|PF13401.6|2.8e+02,AAA_22|PF13401.6|9.6e+0…	0.213	0	1	2	3	2	1	1821	209.6	7.05	0	2																Low	Low	Low	Low	Low	Low	Low	Low
OFAVBQ_DN219973_c0_g1_i1.p1	type:complete	(-),score=77.89,TRAF4_HUMAN	High	43.003 7.04e-90,TRAF4_HUMAN|33.161|1.88e-26,zf-TRAF|PF02176.18|10,zf-TRAF|PF02176.18|2.7e-09,zf-TRAF|PF02176.18|5.9e-08,zf-TRAF|PF02176.18|7.2e-06,zf-TRAF|PF02176.18|2.9e-16,zf-TRAF|PF02176.18|4.9e+03,zf_C2HC_14|PF18574.1|4.2e+02,zf_C2HC_14|PF18574.1|2.8e+03,zf_C2HC_14|PF18574.1|1.1e+03,zf_C2HC_14|PF18574.1|3.3e+03,zf_C2HC_14|PF18574.1|30,zf_C2HC_14|PF18574.1|0.00015,zf-ACC|PF17848.1|1.8,zf-ACC|P…	0.213	0	2	1	1	1	1	584	67.6	8.62	0	1																Low	Not Found	Low	Low	Low	Low	Low	Low
OFAVBQ_DN209999_c0_g1_i1.p1	type:complete	(-),score=218.17,KIT_FSVHZ	High	34.492 4.90e-60,Pkinase_Tyr|PF07714.17|2e-89,Pkinase|PF00069.25|1.1e-08,Pkinase|PF00069.25|5.8e-29,fn3|PF00041.21|0.0086,fn3|PF00041.21|0.0077,fn3|PF00041.21|3e-11,fn3|PF00041.21|0.24,fn3|PF00041.21|4.4e-08,fn3|PF00041.21|0.00029,I-set|PF07679.16|1.4e-09,I-set|PF07679.16|0.0013,Ig_3|PF13927.6|1.8e-09,Ig_3|PF13927.6|0.062,VWA|PF00092.28|4.5e-14,ig|PF00047.25|1.1e-05,ig|PF00047.25|0.19,V-set_CD47|P…	0.201	0	1	1	1	1	1	1406	158.2	6.52	0	1																Low	Not Found	Low	Low	Low	Low	Low	Low
OFAVBQ_DN210333_c4_g1_i1.p1	type:complete	(-),score=39.91,HPGDS_CHICK	High	35.885 7.87e-33,GST_C_3|PF14497.6|3.5e-26,GST_C|PF00043.25|2.4e-10,GST_N|PF02798.20|6.5e-08,GST_N|PF02798.20|1.4e+04,GST_C_2|PF13410.6|4.9e-07,GST_N_3|PF13417.6|2.8e-05,GST_N_3|PF13417.6|1.1e+04,GST_N_3|PF13417.6|6.5e+03,GST_N_2|PF13409.6|0.0006,GST_N_2|PF13409.6|4.5e+03,GST_C_6|PF17171.4|0.09,GST_N_4|PF17172.4|0.34,Adeno_E1A|PF02703.14|0.26 OFAVBQ_DN210333_c4_g1_i1:161-796(-)	0.2	0	3	1	1	1	1	211	24.1	5.19	0	1																Low	Low	Low	Low	Low	Low	Low	Low
OFAVBQ_DN213596_c3_g4_i2.p1	type:5prime_partial	(-),score=12.02,NMT2_DANRE	High	86.667 3.99e-19,NMT_C|PF02799.15|1.9e-15 OFAVBQ_DN213596_c3_g4_i2:623-877(-)	0.208	0	8	1	1	1	1	84	9.3	8.5	0	1																Low	Not Found	Low	Low	Low	Low	Low	Low
OFAVBQ_DN224576_c7_g1_i1.p1			High	OFAVBQ_DN224576_c7_g1~~OFAVBQ_DN224576_c7_g1_i1.p1 ORF type:internal len:88 (-),score=6.88 OFAVBQ_DN224576_c7_g1_i1:1-261(-)	0.198	0	7	1	1	1	1	87	10.2	9.99	0	1																Low	Not Found	Low	Low	Low	Low	Low	Low
OFAVBQ_DN224143_c0_g1_i1.p1	type:5prime_partial	(-),score=29.42,RAB20_MOUSE	High	34.545 1.15e-22,Ras|PF00071.22|1.6e-24,Roc|PF08477.13|3.2e-12,GTP_EFTU|PF00009.27|1.2e-08,Arf|PF00025.21|0.0021 OFAVBQ_DN224143_c0_g1_i1:1274-1765(-)	0.22	0	6	1	1	1	1	163	18.2	5.67	0	1																Low	Not Found	Low	Low	Low	Low	Low	Low
OFAVBQ_DN207562_c3_g1_i3.p1	type:complete	(-),score=75.28,Peptidase_M36	High	PF02128.15 14 OFAVBQ_DN207562_c3_g1_i3:1572-2351(-)	0.214	0	8	3	3	3	1	259	28.9	9.72	0	3																Low	Not Found	Low	Low	Low	Low	Low	Low
OFAVBQ_DN212897_c1_g1_i3.p1	type:complete	(-),score=73.50,RNF4_HUMAN	High	36.449 1.18e-17,zf-C3HC4|PF00097.25|1e-08,zf-RING_2|PF13639.6|5.4e+03,zf-RING_2|PF13639.6|6e-09,zf-RING_UBOX|PF13445.6|4.7e-08,zf-RING_5|PF14634.6|1.3e+02,zf-RING_5|PF14634.6|1.7e-07,zf-C3HC4_2|PF13923.6|1e+02,zf-C3HC4_2|PF13923.6|4e-07,zf-C3HC4_3|PF13920.6|2.7e-07,Prok-RING_4|PF14447.6|58,Prok-RING_4|PF14447.6|8.1e-06,zf-rbx1|PF12678.7|1.2e+03,zf-rbx1|PF12678.7|0.00039,Rtf2|PF04641.12|0.00041,zf…	0.215	0	3	1	1	1	1	308	33.7	5.03	0	1																Low	Not Found	Low	Low	Low	Low	Low	Low
OFAVBQ_DN205833_c3_g1_i9.p1	type:complete	(-),score=135.96,FMNL3_HUMAN	High	24.744 1.16e-42,Drf_GBD|PF06371.13|2.8e-28,Drf_GBD|PF06371.13|5.7e+03,FH2|PF02181.23|1.3e+02,FH2|PF02181.23|1.1e-15,ZapB|PF06005.12|1.2e+03,ZapB|PF06005.12|0.0011,HAP1_N|PF04849.13|0.0014,Nup54|PF13874.6|5.6e+03,Nup54|PF13874.6|0.0013,Leu_zip|PF15294.6|6.2e+03,Leu_zip|PF15294.6|0.01,GIT_CC|PF16559.5|0.033,TSC22|PF01166.18|0.069,DivIC|PF04977.15|2e+03,DivIC|PF04977.15|0.15,YabA|PF06156.13|7.9e+02,…	0.216	0	1	1	4	1	1	639	72.8	6.05	0	1																Low	Low	Low	Low	Low	Low	Low	Low
OFAVBQ_DN219886_c1_g1_i1.p1	type:5prime_partial	(-),score=36.92,Syndecan	High	PF01034.20 0.045,Syndecan|PF01034.20|5.9e+03 OFAVBQ_DN219886_c1_g1_i1:9-758(-)	0.219	0	2	1	2	1	1	249	27.7	4.81	0	1																Low	Not Found	Low	Low	Low	Low	Low	Low
OFAVBQ_DN201416_c2_g1_i1.p1	type:internal	(-),score=21.83,SVEP1_RAT	High	43.333 2.36e-12,HYR|PF02494.16|2e-10,HYR|PF02494.16|4.7e-06 OFAVBQ_DN201416_c2_g1_i1:2-391(-)	0.249	0	6	1	1	1	1	130	14.5	7.34	0	1																Low	Not Found	Low	Low	Low	Low	Low	Low
OFAVBQ_DN220488_c0_g3_i2.p1	type:complete	(-),score=153.74,Beta_helix	High	PF13229.6 0.029,Beta_helix|PF13229.6|1.3e+02,Beta_helix|PF13229.6|0.0054,Beta_helix|PF13229.6|85,Apq12|PF12716.7|5 OFAVBQ_DN220488_c0_g3_i2:742-5175(-)	0.08	0	1	1	1	1	1	1477	163	8.54	0	1																Low	Low	Low	Low	Low	Low	Low	Low
OFAVBQ_DN219863_c0_g1_i1.p1	type:complete	(-),score=127.65,PRCC_HUMAN	High	43.590 2.54e-25,PRCC|PF10253.9|3.5e+03,PRCC|PF10253.9|3.3e+03,PRCC|PF10253.9|1.1e-31 OFAVBQ_DN219863_c0_g1_i1:952-2562(-)	0.25	0	4	2	2	2	1	536	59.2	6.38	0	2																Low	Not Found	Low	Low	Low	Low	Low	Low
OFAVBQ_DN221062_c0_g1_i5.p6	type:complete	(+),score=17.69,Topo_Zn_Ribbon	High	PF08272.11 0.19 OFAVBQ_DN221062_c0_g1_i5:4348-4629(+)	0.236	0	18	2	2	2	1	93	10.2	6.52	0	2																Low	Low	Low	Low	Low	Low	Low	Low
OFAVBQ_DN220174_c7_g4_i2.p1			High	OFAVBQ_DN220174_c7_g4~~OFAVBQ_DN220174_c7_g4_i2.p1 ORF type:5prime_partial len:178 (-),score=19.46 OFAVBQ_DN220174_c7_g4_i2:280-813(-)	0.08	0	6	1	1	1	1	177	20.6	5.14	0	1																Low	Not Found	Low	Low	Low	Low	Low	Low
OFAVBQ_DN204641_c0_g1_i2.p1	type:complete	(-),score=47.89,BAT38_CAEEL	High	35.938 4.67e-15,BTB|PF00651.31|1e-23,ApoLp-III|PF07464.11|0.083,DUF724|PF05266.14|0.087 OFAVBQ_DN204641_c0_g1_i2:624-1499(-)	0.08	0	6	2	2	2	1	291	32.8	6.86	0	2																Low	Low	Low	Low	Low	Low	Low	Low
OFAVBQ_DN224880_c5_g2_i3.p1			High	OFAVBQ_DN224880_c5_g2~~OFAVBQ_DN224880_c5_g2_i3.p1 ORF type:5prime_partial len:244 (-),score=46.74 OFAVBQ_DN224880_c5_g2_i3:292-1023(-)	0.08	0	7	2	4	2	1	243	27	8.69	0	2																Low	Low	Low	Low	Low	Low	Low	Low
OFAVBQ_DN217893_c1_g1_i2.p1	type:complete	(-),score=47.09,FAXC_RAT	High	34.274 8.92e-48,GST_N_4|PF17172.4|3.2e-32,GST_C_6|PF17171.4|1.8e+03,GST_C_6|PF17171.4|2.5e-15,Tom37|PF10568.9|2.3e-10,GST_C_2|PF13410.6|3.4e+03,GST_C_2|PF13410.6|5e-06,GST_C_3|PF14497.6|0.0082,GST_C|PF00043.25|0.012,UBZ_FAAP20|PF15750.5|0.47,UBZ_FAAP20|PF15750.5|4.7e+03 OFAVBQ_DN217893_c1_g1_i2:202-1044(-)	0.225	0	4	1	1	1	1	280	32.3	9.25	0	1																Low	Low	Low	Low	Low	Low	Low	Low
OFAVBQ_DN216512_c2_g3_i3.p1	type:complete	(-),score=10.23,SC6A8_TORMA	High	61.017 7.09e-18,SNF|PF00209.18|2e-18 OFAVBQ_DN216512_c2_g3_i3:658-903(-)	0.081	0	9	1	1	1	1	81	9	7.84	0	1																Low	Not Found	Low	Low	Low	Low	Low	Low
OFAVBQ_DN203054_c0_g1_i2.p1			High	OFAVBQ_DN203054_c0_g1~~OFAVBQ_DN203054_c0_g1_i2.p1 ORF type:5prime_partial len:152 (-),score=16.30 OFAVBQ_DN203054_c0_g1_i2:223-678(-)	0.081	0	5	1	1	1	1	151	17.4	7.97	0	1																Low	Not Found	Low	Low	Low	Low	Low	Low
OFAVBQ_DN156659_c0_g1_i1.p1			High	OFAVBQ_DN156659_c0_g1~~OFAVBQ_DN156659_c0_g1_i1.p1 ORF type:5prime_partial len:115 (+),score=3.63 OFAVBQ_DN156659_c0_g1_i1:3-347(+)	0.228	0	6	1	1	1	1	114	12.6	7.42	0	1																Low	Low	Low	Low	Low	Low	Low	Low
OFAVBQ_DN220878_c3_g1_i2.p1	type:complete	(-),score=156.35,NECA_HYDVU	High	65.391 0.0,NECA_HYDVU|42.718|5.71e-11,Peptidase_S8|PF00082.22|1.9e-48,S8_pro-domain|PF16470.5|6e-24,P_proprotein|PF01483.20|2.5e-21,APP_amyloid|PF10515.9|1.8e+04,APP_amyloid|PF10515.9|0.062 OFAVBQ_DN220878_c3_g1_i2:346-2985(-)	0.197	0	2	2	3	2	1	879	97.1	5.26	0	2																Low	Low	Low	Low	Low	Low	Low	Low
OFAVBQ_DN201619_c0_g2_i3.p2	type:complete	(-),score=31.31,MEP1_MAGO7	High	37.121 1.16e-17,DUF3447|PF11929.8|0.035,Reprolysin_4|PF13583.6|0.063,Peptidase_M66|PF10462.9|0.077,Peptidase_M10|PF00413.24|0.13,Reprolysin_3|PF13582.6|0.24,Reprolysin_5|PF13688.6|2.3e+03,Reprolysin_5|PF13688.6|0.3 OFAVBQ_DN201619_c0_g2_i3:2455-3252(-)	0.088	0	6	2	2	2	1	265	30.1	7.93	0	2																Low	Low	Low	Low	Low	Low	Low	Low
OFAVBQ_DN208539_c0_g3_i1.p1	type:3prime_partial	(-),score=90.32,MCM6_C	High	PF18263.1 2.8e+03,MCM6_C|PF18263.1|0.11 OFAVBQ_DN208539_c0_g3_i1:1-1032(-)	0.3	0	6	2	2	2	1	344	39.4	5.73	0	2	1.875	0.798	0.604	0.709	0.607	0.54	0.656	117.8	220.9	94	71.1	83.5	71.6	63.7	77.3	Low	Low	Low	Low	Low	Low	Low	Low
OFAVBQ_DN80807_c0_g1_i1.p1	type:internal	(-),score=19.04,NDK_NEUCR	High	68.478 9.82e-44,NDK|PF00334.19|3.4e-34 OFAVBQ_DN80807_c0_g1_i1:3-302(-)	0.294	0	9	1	1	1	1	100	11.1	9.57	0	1																Low	Not Found	Low	Low	Low	Low	Low	Low
OFAVBQ_DN208697_c0_g7_i1.p1	type:complete	(-),score=38.14,RAC1_RAT	High	43.299 6.05e-53,Ras|PF00071.22|5.4e-36,Roc|PF08477.13|3.3e-16,Arf|PF00025.21|0.00017,ABC_tran|PF00005.27|0.2,GTP_EFTU|PF00009.27|3.9,GTP_EFTU|PF00009.27|62 OFAVBQ_DN208697_c0_g7_i1:667-1302(-)	0.286	0	4	1	2	1	1	211	23.6	8.6	0	1																Low	Not Found	Low	Low	Low	Low	Low	Low
OFAVBQ_DN201699_c4_g1_i3.p1			High	OFAVBQ_DN201699_c4_g1~~OFAVBQ_DN201699_c4_g1_i3.p1 ORF type:3prime_partial len:85 (+),score=3.87 OFAVBQ_DN201699_c4_g1_i3:604-855(+)	0.232	0	17	1	1	1	1	84	9.8	8.92	0	1																Not Found	Not Found	Low	Low	Low	Low	Low	Low
OFAVBQ_DN212162_c7_g1_i1.p1			High	OFAVBQ_DN212162_c7_g1~~OFAVBQ_DN212162_c7_g1_i1.p1 ORF type:complete len:372 (-),score=59.07 OFAVBQ_DN212162_c7_g1_i1:2275-3360(-)	0.235	0	2	1	5	1	1	361	40.3	8.6	0	1																Low	Low	Low	Low	Low	Low	Low	Low
OFAVBQ_DN216795_c1_g3_i1.p1	type:5prime_partial	(-),score=15.09,ABCC3_DICDI	High	60.465 1.82e-29 OFAVBQ_DN216795_c1_g3_i1:421-822(-)	0.235	0	5	1	1	1	1	133	15.2	7.34	0	1																Low	Low	Low	Low	Low	Low	Low	Low
OFAVBQ_DN219857_c1_g1_i2.p1	type:5prime_partial	(-),score=259.89,OS9_BOVIN	High	37.329 1.08e-56,PRKCSH|PF07915.13|4.1e-14,PRKCSH|PF07915.13|1.5e+04,PRKCSH|PF07915.13|2.6e+03,PRKCSH_1|PF13015.6|5.3e-07,PRKCSH_1|PF13015.6|3e+02 OFAVBQ_DN219857_c1_g1_i2:524-3412(-)	0.302	0	2	1	4	1	1	962	109.1	4.91	0	1																Low	Low	Low	Low	Low	Low	Low	Low
OFAVBQ_DN215164_c1_g1_i13.p1	type:complete	(-),score=252.90,ARI4A_HUMAN	High	41.916 9.57e-64,RBB1NT|PF08169.11|4e-24,ARID|PF01388.21|8e-22,Tudor-knot|PF11717.8|5.7e-10,PWWP|PF00855.17|0.00077,PWWP|PF00855.17|1.5e+02,PWWP|PF00855.17|1.1e+04,Tudor_2|PF18104.1|0.2,Tudor_2|PF18104.1|3.4,ZapB|PF06005.12|0.53,DUF1192|PF06698.11|0.75,DUF1664|PF07889.12|2.6e+02,DUF1664|PF07889.12|4 OFAVBQ_DN215164_c1_g1_i13:2049-5066(-)	0.261	0	2	2	9	2	1	1005	111.7	7.69	0	2																Low	Low	Low	Low	Low	Low	Low	Low
OFAVBQ_DN220810_c1_g1_i1.p7	type:complete	(+),score=0.68,DUF3871	High	PF12987.7 0.037 OFAVBQ_DN220810_c1_g1_i1:5655-5864(+)	0.253	0	13	1	3	1	1	69	8.4	11.53	0	1																Low	Low	Low	Low	Low	Low	Low	Low
OFAVBQ_DN214854_c1_g1_i3.p1	type:complete	(-),score=71.86,UIM	High	PF02809.20 0.035 OFAVBQ_DN214854_c1_g1_i3:595-1782(-)	0.234	0	7	3	3	3	1	395	44.5	9.77	0	3	1.126	1.007	1.173	1.285	0.938	0.9	0.742	97.9	110.2	98.6	114.9	125.8	91.8	88.1	72.7	Low	Low	Low	Low	Low	Low	Low	Low
OFAVBQ_DN190766_c0_g1_i2.p1	type:complete	(-),score=27.99,CHSTB_MOUSE	High	37.743 7.37e-42,Sulfotransfer_2|PF03567.14|5.4e-35,zf-ANAPC11|PF12861.7|0.29,NblA|PF04485.12|2.6e+03,NblA|PF04485.12|0.62 OFAVBQ_DN190766_c0_g1_i2:87-1187(-)	0.282	0	2	1	2	1	1	366	42.4	9.04	0	1																Low	Low	Low	Low	Low	Low	Low	Low
OFAVBQ_DN225436_c3_g1_i1.p1	type:complete	(-),score=481.75,FBN2_HUMAN	High	27.431 1.55e-84,FBN2_HUMAN|30.111|4.78e-83,FBN2_HUMAN|27.218|2.32e-73,FBN2_HUMAN|28.944|1.28e-45,FBN2_HUMAN|27.306|2.37e-44,FBN2_HUMAN|35.965|1.48e-38,FBN2_HUMAN|30.435|3.53e-34,FBN2_HUMAN|27.073|8.27e-32,FBN2_HUMAN|29.558|2.15e-29,FBN2_HUMAN|28.351|5.01e-22,FBN2_HUMAN|33.466|7.07e-22,FBN2_HUMAN|36.875|4.68e-15,FBN2_HUMAN|29.063|1.34e-13,FBN2_HUMAN|42.222|3.40e-06,EGF_CA|PF07645.15|4.5,EGF_CA|PF0…	0.283	0	0	1	1	1	1	4557	501.8	5.9	0	1																Low	Low	Low	Low	Low	Low	Low	Low
OFAVBQ_DN200474_c7_g1_i1.p1	type:complete	(-),score=102.35,LIN41_DANRE	High	28.680 1.18e-87,NHL|PF01436.21|0.04,NHL|PF01436.21|3.5e-11,NHL|PF01436.21|4.5e-07,NHL|PF01436.21|2.3e+02,NHL|PF01436.21|1.3e-06,NHL|PF01436.21|0.0039,Filamin|PF00630.19|2.9e-16,zf-RING_UBOX|PF13445.6|4.6e-10,zf-RING_UBOX|PF13445.6|6e+03,zf-RING_UBOX|PF13445.6|1.4e+03,zf-B_box|PF00643.24|0.00079,zf-B_box|PF00643.24|4.9e-08,zf-C3HC4|PF00097.25|6e-09,DUF5128|PF17170.4|0.3,DUF5128|PF17170.4|1.7,DUF51…	0.229	0	2	1	1	1	1	750	83.9	7.2	0	1																Low	Not Found	Low	Low	Low	Low	Low	Low
OFAVBQ_DN185773_c0_g1_i1.p2	type:complete	(-),score=14.66,UPAR_LY6	High	PF00021.21 7.3e-05,UPAR_LY6_2|PF16975.5|0.00029,PLA2_inh|PF02988.15|2.9 OFAVBQ_DN185773_c0_g1_i1:162-554(-)	0.228	0	8	1	1	1	1	130	13.8	6.37	0	1																Low	Not Found	Low	Low	Low	Low	Low	Low
OFAVBQ_DN208398_c5_g3_i4.p1	type:5prime_partial	(-),score=181.80,FINC_MOUSE	High	46.552 2.16e-22,fn2|PF00040.19|1.1e+04,fn2|PF00040.19|1.5e-15,fn2|PF00040.19|1.6e-14,SlyX|PF04102.12|36,SlyX|PF04102.12|3.5 OFAVBQ_DN208398_c5_g3_i4:274-3372(-)	0.227	0	1	2	9	2	1	1032	112.6	7.5	0	2																Low	Low	Low	Low	Low	Low	Low	Low
OFAVBQ_DN203190_c0_g2_i1.p2			High	OFAVBQ_DN203190_c0_g2~~OFAVBQ_DN203190_c0_g2_i1.p2 ORF type:complete len:72 (+),score=4.23 OFAVBQ_DN203190_c0_g2_i1:1133-1348(+)	0.257	0	14	1	1	1	1	71	8.2	9.52	0	1	1.161	0.961	0.828	1.122	1.291	0.785	0.901	99.4	115.4	95.5	82.3	111.5	128.3	78	89.6	Low	Low	Low	Low	Low	Low	Low	Low
OFAVBQ_DN221129_c8_g1_i1.p1			High	OFAVBQ_DN221129_c8_g1~~OFAVBQ_DN221129_c8_g1_i1.p1 ORF type:complete len:187 (+),score=36.56 OFAVBQ_DN221129_c8_g1_i1:590-1150(+)	0.225	0	5	1	1	1	1	186	21	6.57	0	1																Low	Not Found	Low	Low	Low	Low	Low	Low
OFAVBQ_DN211692_c6_g4_i2.p1	type:complete	(-),score=33.23,EphA2_TM	High	PF14575.6 1e+03,EphA2_TM|PF14575.6|0.21,Tweety|PF04906.13|0.091,Rax2|PF12768.7|0.15,Adeno_E3_CR2|PF02439.15|0.065,Adeno_E3_CR2|PF02439.15|7.4e+03 OFAVBQ_DN211692_c6_g4_i2:825-1586(-)	0.224	0	9	1	20	1	1	253	27	7.88	0	1	1.35	1.403	1.14	1.557	1.665	1.626	2.626	64.7	87.4	90.8	73.8	100.7	107.7	105.2	169.8	Low	Low	Low	Low	Low	Low	Low	Low
OFAVBQ_DN222693_c1_g1_i3.p2			High	OFAVBQ_DN222693_c1_g1~~OFAVBQ_DN222693_c1_g1_i3.p2 ORF type:complete len:99 (-),score=3.52 OFAVBQ_DN222693_c1_g1_i3:1174-1470(-)	0.223	0	8	1	7	1	1	98	11.2	9.58	0	1																Low	Low	Low	Low	Low	Low	Low	Low
OFAVBQ_DN218161_c0_g3_i1.p1	type:5prime_partial	(+),score=23.31,DUF755	High	PF05501.11 9.2e+03,DUF755|PF05501.11|0.089,FRG2|PF15315.6|1.6 OFAVBQ_DN218161_c0_g3_i1:3-290(+)	0.279	0	7	1	1	1	1	95	11.1	10.04	0	1																Not Found	Not Found	Low	Low	Not Found	Not Found	Not Found	Low
OFAVBQ_DN209398_c3_g1_i2.p1	type:5prime_partial	(-),score=208.64,PK1L3_HUMAN	High	27.937 5.24e-61,PK1L3_HUMAN|24.686|1.65e-13,PKD_channel|PF08016.12|5.7e+03,PKD_channel|PF08016.12|3.5e+03,PKD_channel|PF08016.12|1.4e-56,PLAT|PF01477.23|3.3e-17,F5_F8_type_C|PF00754.25|7.3e-11,GPS|PF01825.21|5.7e-09,GPS|PF01825.21|5.9e+03,Ion_trans|PF00520.31|4e+03,Ion_trans|PF00520.31|2.6e+03,Ion_trans|PF00520.31|1.8e-08,Cortexin|PF11057.8|1.1e+02,Cortexin|PF11057.8|8.6 OFAVBQ_DN209398_c3_g1_i2:…	0.272	0	1	2	2	2	1	2193	249.1	8.95	0	2																Low	Not Found	Low	Low	Low	Low	Low	Low
OFAVBQ_DN214247_c3_g1_i4.p1	type:complete	(-),score=101.34,FP_ACRMI	High	31.961 6.20e-50,Ig_3|PF13927.6|5.1e-06,Ig_3|PF13927.6|2.6e+03,Ig_3|PF13927.6|3.8e-11,Ig_3|PF13927.6|1.8e-08,I-set|PF07679.16|4.9e-07,I-set|PF07679.16|2.8e-08,I-set|PF07679.16|1.5e-05,Ig_2|PF13895.6|1.9e-05,Ig_2|PF13895.6|6.6e-08,Ig_2|PF13895.6|4.6e-07,ig|PF00047.25|0.0013,ig|PF00047.25|2.5e-05,ig|PF00047.25|0.0026,V-set|PF07686.17|8.2,V-set|PF07686.17|0.086,V-set|PF07686.17|9.3,TMEM154|PF15102.6|…	0.274	0	1	1	1	1	1	724	80.4	5.29	0	1																Low	Not Found	Low	Low	Low	Low	Low	Low
OFAVBQ_DN220726_c4_g1_i5.p1	type:complete	(-),score=102.68,PTN9_MOUSE	High	42.932 1.84e-166,Y_phosphatase|PF00102.27|1.2e-73,CRAL_TRIO|PF00650.20|9.5e-28,CRAL_TRIO_2|PF13716.6|3.7e-12,CRAL_TRIO_2|PF13716.6|9.9e+03,DSPc|PF00782.20|0.01,Y_phosphatase3|PF13350.6|0.095 OFAVBQ_DN220726_c4_g1_i5:1901-3523(-)	0.141	0	2	1	1	1	1	540	61.5	7.36	0	1																Low	Low	Low	Low	Low	Low	Low	Low
OFAVBQ_DN208141_c0_g1_i4.p1	type:complete	(-),score=136.34,DDX21_HUMAN	High	50.839 0.0,DEAD|PF00270.29|4.3e-46,Helicase_C|PF00271.31|4.4e+03,Helicase_C|PF00271.31|1.2e-25,GUCT|PF08152.12|1e-22,ResIII|PF04851.15|1.1e-06,CMS1|PF14617.6|0.00055,AAA_30|PF13604.6|0.088,AAA_30|PF13604.6|6.9e+03,SecA_DEAD|PF07517.14|0.61,SecA_DEAD|PF07517.14|2.8e+02 OFAVBQ_DN208141_c0_g1_i4:1776-3779(-)	0.266	0	1	1	3	1	1	667	75	8.73	0	1																Low	Not Found	Low	Low	Low	Low	Low	Low
OFAVBQ_DN191601_c0_g1_i1.p1	type:5prime_partial	(-),score=78.26,KGCY_HEDDI	High	37.466 4.36e-63,ATP-gua_Ptrans|PF00217.19|1.7e-61,ATP-gua_PtransN|PF02807.15|3.3e-14 OFAVBQ_DN191601_c0_g1_i1:89-1459(-)	0.174	0	1	1	2	1	1	456	50.9	5.83	0	1																Low	Not Found	Low	Low	Low	Low	Low	Low
OFAVBQ_DN211137_c4_g3_i1.p2			High	OFAVBQ_DN211137_c4_g3~~OFAVBQ_DN211137_c4_g3_i1.p2 ORF type:complete len:87 (-),score=4.15 OFAVBQ_DN211137_c4_g3_i1:344-604(-)	0.174	0	13	2	5	2	1	86	10.3	10.33	0	2																Low	Low	Low	Low	Low	Low	Low	Low
OFAVBQ_DN220235_c3_g1_i10.p1	type:complete	(-),score=182.94,LRP8_CHICK	High	39.664 2.48e-174,LRP8_CHICK|41.379|5.08e-36,LRP8_CHICK|42.222|9.92e-28,Ldl_recept_a|PF00057.18|0.00048,Ldl_recept_a|PF00057.18|7.1e-13,Ldl_recept_a|PF00057.18|4.6e-12,Ldl_recept_a|PF00057.18|1.6e-13,Ldl_recept_a|PF00057.18|4.2e-13,Ldl_recept_a|PF00057.18|6.2e-11,Ldl_recept_a|PF00057.18|7e-10,Ldl_recept_a|PF00057.18|1.2e+03,Ldl_recept_b|PF00058.17|0.0078,Ldl_recept_b|PF00058.17|6e-12,Ldl_recept_b|…	0.175	0	2	2	2	2	1	845	93	5.25	0	2																Low	Low	Low	Low	Low	Low	Low	Low
OFAVBQ_DN223430_c2_g2_i1.p1	type:internal	(-),score=6.48,TF29_SCHPO	High	41.509 5.16e-06,RT_RNaseH_2|PF17919.1|1.3e-16,RT_RNaseH|PF17917.1|6.3e-15,Tat|PF00539.18|0.29 OFAVBQ_DN223430_c2_g2_i1:3-278(-)	0.176	0	11	2	7	2	1	92	10.3	8.72	0	2																Low	Low	Low	Low	Low	Low	Low	Low
OFAVBQ_DN213288_c2_g1_i2.p1	type:complete	(-),score=29.47,PTTG_MOUSE	High	31.206 3.38e-06,TMEM154|PF15102.6|4.3e-05,MAP17|PF15807.5|1.4e+04,MAP17|PF15807.5|0.055,Phage_Gp23|PF10669.9|0.067,EphA2_TM|PF14575.6|2.4e+03,EphA2_TM|PF14575.6|0.28,FHIPEP|PF00771.20|0.086,DUF4834|PF16118.5|3.4e+03,DUF4834|PF16118.5|0.5,Vpu|PF00558.19|0.39,Prominin|PF05478.11|1.8e+02,Prominin|PF05478.11|0.04,TMEM132D_C|PF15706.5|1.7e+03,TMEM132D_C|PF15706.5|1.1,Nup_retrotrp_bd|PF10599.9|2.7,Muci…	0.176	0	4	1	1	1	1	225	25.1	8.7	0	1																Low	Not Found	Low	Low	Low	Low	Low	Low
OFAVBQ_DN165095_c0_g1_i1.p1	type:complete	(-),score=37.49,Laps	High	PF10169.9 0.00048,FANCI_HD2|PF14680.6|0.052 OFAVBQ_DN165095_c0_g1_i1:1558-1926(-)	0.183	0	5	1	11	1	1	122	14.4	9.99	0	1																Low	Low	Low	Low	Low	Low	Low	Low
OFAVBQ_DN219768_c0_g1_i3.p2			High	OFAVBQ_DN219768_c0_g1~~OFAVBQ_DN219768_c0_g1_i3.p2 ORF type:complete len:116 (-),score=4.86 OFAVBQ_DN219768_c0_g1_i3:1166-1513(-)	0.183	0	7	1	1	1	1	115	12.9	10.27	0	1																Low	Low	Low	Low	Low	Low	Low	Low
OFAVBQ_DN209967_c1_g5_i1.p1	type:5prime_partial	(+),score=5.19,Connexin	High	PF00029.19 0.079 OFAVBQ_DN209967_c1_g5_i1:3-215(+)	0.19	0	16	1	1	1	1	70	8.1	10.89	0	1																Low	Not Found	Low	Low	Low	Low	Low	Low
OFAVBQ_DN224821_c1_g2_i1.p1	type:internal	(-),score=55.28,Med3	High	PF11593.8 0.1 OFAVBQ_DN224821_c1_g2_i1:3-770(-)	0.173	0	3	1	2	1	1	256	27.3	6.1	0	1																Low	Low	Low	Low	Low	Low	Low	Low
OFAVBQ_DN225329_c1_g3_i1.p1	type:complete	(-),score=1617.89,GOGA4_MOUSE	High	20.092 1.95e-34,GOGA4_MOUSE|22.278|4.09e-30,GOGA4_MOUSE|20.588|1.02e-28,GOGA4_MOUSE|22.972|1.12e-27,GOGA4_MOUSE|20.715|4.55e-20,GOGA4_MOUSE|20.456|3.47e-18,GOGA4_MOUSE|22.555|7.00e-16,Ephrin_rec_like|PF07699.13|1e+02,Ephrin_rec_like|PF07699.13|5.1,Ephrin_rec_like|PF07699.13|1.1e+02,Ephrin_rec_like|PF07699.13|1.3e+04,Ephrin_rec_like|PF07699.13|2.1e+03,Ephrin_rec_like|PF07699.13|6.8e+03,Ephrin_rec_…	0.191	0	0	3	3	3	1	6810	742.1	5.16	0	3																Low	Low	Low	Low	Low	Low	Low	Low
OFAVBQ_DN223219_c1_g3_i2.p1	type:5prime_partial	(-),score=94.34,NPHP3_XENTR	High	28.024 3.33e-29,NPHP3_XENTR|26.280|9.16e-25,NPHP3_XENTR|25.559|1.23e-19,TPR_12|PF13424.6|2e-09,TPR_12|PF13424.6|1.6e-14,TPR_12|PF13424.6|1.3e-16,TPR_12|PF13424.6|5e-08,TPR_12|PF13424.6|6.6e-10,TPR_1|PF00515.28|3.6e-06,TPR_1|PF00515.28|0.00016,TPR_1|PF00515.28|0.00028,TPR_1|PF00515.28|0.00018,TPR_1|PF00515.28|4.4e-05,TPR_1|PF00515.28|0.009,TPR_1|PF00515.28|0.00037,TPR_10|PF13374.6|5.4e+03,TPR_10|P…	0.192	0	1	1	2	1	1	620	70.2	5.85	0	1																Low	Not Found	Low	Low	Low	Low	Low	Low
OFAVBQ_DN203506_c2_g1_i1.p1			High	OFAVBQ_DN203506_c2_g1~~OFAVBQ_DN203506_c2_g1_i1.p1 ORF type:internal len:83 (-),score=6.05 OFAVBQ_DN203506_c2_g1_i1:2-247(-)	0.192	0	20	1	1	1	1	82	9.3	5.36	0	1																Low	Not Found	Low	Low	Low	Low	Low	Low
OFAVBQ_DN212616_c4_g1_i3.p1	type:complete	(-),score=148.95,B3A2_MOUSE	High	42.825 0.0,HCO3_cotransp|PF00955.21|2.1e-68,HCO3_cotransp|PF00955.21|3.2e-101,Band_3_cyto|PF07565.13|4e-92,PTS_EIIA_2|PF00359.22|8.3e-05,PTS_EIIA_2|PF00359.22|4.1e+02,eIF3g|PF12353.8|0.14,eIF3g|PF12353.8|7.3e+03 OFAVBQ_DN212616_c4_g1_i3:483-2804(-)	0.192	0	1	1	1	1	1	773	86.1	7.12	0	1																Low	Not Found	Low	Low	Low	Low	Low	Low
OFAVBQ_DN210109_c1_g1_i7.p1	type:complete	(-),score=42.57,S26A6_MOUSE	High	40.200 5.79e-116,Sulfate_transp|PF00916.20|8.3e-112,MFS_MOT1|PF16983.5|2.1e+03,MFS_MOT1|PF16983.5|5.8e+02,MFS_MOT1|PF16983.5|1.2e+03,MFS_MOT1|PF16983.5|0.0017 OFAVBQ_DN210109_c1_g1_i7:2787-4484(-)	0.193	0	3	1	1	1	1	565	61	9.35	0	1																Low	Low	Low	Low	Low	Low	Low	Low
OFAVBQ_DN258749_c0_g1_i1.p1	type:5prime_partial	(-),score=16.80,VDAC1_RABIT	High	53.623 1.77e-18,Porin_3|PF01459.22|2.1e-10 OFAVBQ_DN258749_c0_g1_i1:6-224(-)	0.19	0	11	1	1	1	1	72	7.5	9.52	0	1																Not Found	Not Found	Low	Not Found	Not Found	Not Found	Not Found	Not Found
OFAVBQ_DN151955_c0_g1_i1.p1	type:3prime_partial	(-),score=18.05,T4_baseplate	High	PF12322.8 0.0031,DUF3106|PF11304.8|3.9e+02,DUF3106|PF11304.8|0.45 OFAVBQ_DN151955_c0_g1_i1:2-250(-)	0.194	0	22	1	1	1	1	83	9.7	4.17	0	1																Low	Not Found	Low	Low	Low	Low	Low	Low
OFAVBQ_DN204883_c0_g1_i1.p1	type:complete	(-),score=27.21,CB068_XENLA	High	33.333 3.78e-13,UPF0561|PF10573.9|2.2e-13 OFAVBQ_DN204883_c0_g1_i1:518-943(-)	0.194	0	9	1	1	1	1	141	16.2	9.44	0	1																Not Found	Not Found	Not Found	Not Found	Not Found	Not Found	Not Found	Not Found
OFAVBQ_DN214789_c2_g1_i4.p3	type:complete	(+),score=9.11,Pec_lyase	High	PF09492.10 0.097 OFAVBQ_DN214789_c2_g1_i4:1024-1239(+)	0.195	0	13	1	1	1	1	71	8.2	9.92	0	1																Low	Not Found	Low	Low	Low	Low	Low	Low
OFAVBQ_DN214919_c3_g2_i1.p1	type:3prime_partial	(+),score=23.14,DUF3504	High	PF12012.8 9.5e-06,DUF4539|PF15072.6|1e+03,DUF4539|PF15072.6|0.83 OFAVBQ_DN214919_c3_g2_i1:386-961(+)	0.191	0	8	2	3	2	1	192	21.4	9.54	0	2																Low	Low	Low	Low	Low	Low	Low	Low
OFAVBQ_DN209424_c0_g1_i1.p1	type:complete	(-),score=185.67,MC6ZA_XENLA	High	70.135 0.0,MCM|PF00493.23|2.2e-102,MCM_OB|PF17207.3|3.5e-35,MCM_lid|PF17855.1|1.2e-26,MCM6_C|PF18263.1|6.4e-25,MCM_N|PF14551.6|8.5e-17,MCM_N|PF14551.6|4.1e+03,Mg_chelatase|PF01078.21|3.2e+03,Mg_chelatase|PF01078.21|5.9e-07,AAA_3|PF07726.11|9.6e-06,AAA_5|PF07728.14|0.0001,Sigma54_activat|PF00158.26|0.0082,Mg_chelatase_C|PF13335.6|1.8e+04,Mg_chelatase_C|PF13335.6|8e+03,Mg_chelatase_C|PF13335.6|0.44…	0.195	0	1	1	2	1	1	816	92.3	5.2	0	1																Low	Not Found	Low	Low	Low	Low	Low	Low
OFAVBQ_DN212825_c0_g2_i2.p1	type:complete	(-),score=289.95,PKD1_MOUSE	High	23.236 1.90e-98,PKD_channel|PF08016.12|6.5e-103,REJ|PF02010.15|4.1e+03,REJ|PF02010.15|5.9e-73,PLAT|PF01477.23|1.1e-22,PKD|PF00801.20|0.087,PKD|PF00801.20|3.3,PKD|PF00801.20|1.1e+04,PKD|PF00801.20|1e-06,PKD|PF00801.20|0.0013,PKD|PF00801.20|13,Ion_trans|PF00520.31|5.1e+03,Ion_trans|PF00520.31|6.9e-11,GPS|PF01825.21|1.8e-07,WSC|PF01822.19|0.0012 OFAVBQ_DN212825_c0_g2_i2:742-10314(-)	0.172	0	1	3	3	3	1	3190	357.9	8.02	0	3																Low	Low	Low	Low	Low	Low	Low	Low
OFAVBQ_DN216329_c0_g1_i1.p1			High	OFAVBQ_DN216329_c0_g1~~OFAVBQ_DN216329_c0_g1_i1.p1 ORF type:internal len:116 (-),score=16.23 OFAVBQ_DN216329_c0_g1_i1:1-345(-)	0.177	0	12	1	1	1	1	115	12.7	10.15	0	1																Low	Low	Low	Low	Low	Low	Low	Low
OFAVBQ_DN192478_c0_g2_i2.p1	type:3prime_partial	(-),score=68.97,CRLD2_XENTR	High	41.414 2.50e-37,CAP|PF00188.26|8.2e-17,ShK|PF01549.24|1.6e+04,ShK|PF01549.24|0.0005,ShK|PF01549.24|1e+03,ShK|PF01549.24|0.57,ShK|PF01549.24|0.0013,ShK|PF01549.24|0.00092,zf_CCCH_4|PF18345.1|5.5e+03,zf_CCCH_4|PF18345.1|6e+03,zf_CCCH_4|PF18345.1|83,zf_CCCH_4|PF18345.1|40,zf_CCCH_4|PF18345.1|74,zf_CCCH_4|PF18345.1|5.5,PLAC|PF08686.11|2.8e+03,PLAC|PF08686.11|16,PLAC|PF08686.11|7.2,PLAC|PF08686.11|1.6…	0.13	0	3	2	2	2	1	499	54.9	8.15	0	2																Low	Low	Low	Low	Low	Low	Low	Low
OFAVBQ_DN204384_c2_g1_i5.p1	type:3prime_partial	(-),score=106.95,EI2BE_MOUSE	High	43.446 2.00e-178,NTP_transferase|PF00483.23|2e-09,NTP_transferase|PF00483.23|3.9e+03,W2|PF02020.18|1.1e-08,Hexapep|PF00132.24|0.0019,Hexapep|PF00132.24|0.0017,Hexapep|PF00132.24|0.016,Hexapep_2|PF14602.6|8.2e+02,Hexapep_2|PF14602.6|0.033,Hexapep_2|PF14602.6|33,NTP_transf_3|PF12804.7|0.0054,DUF4954|PF16314.5|1.7e+03,DUF4954|PF16314.5|0.031 OFAVBQ_DN204384_c2_g1_i5:2-2290(-)	0.13	0	3	2	2	2	1	763	86.8	5.52	0	2																Low	Not Found	Low	Low	Low	Low	Low	Low
OFAVBQ_DN214752_c0_g2_i1.p1	type:complete	(-),score=108.60,DMD_CHICK	High	39.207 1.53e-43,CH|PF00307.31|3e-14,CH|PF00307.31|1.1e-16,CAMSAP_CH|PF11971.8|3.7,CAMSAP_CH|PF11971.8|0.012 OFAVBQ_DN214752_c0_g2_i1:3360-5237(-)	0.13	0	1	1	1	1	1	625	69.4	5.85	0	1																Low	Not Found	Low	Low	Low	Low	Low	Low
OFAVBQ_DN182056_c0_g1_i1.p1	type:5prime_partial	(-),score=46.31,KMO_CRYNJ	High	27.336 6.49e-35,FAD_binding_3|PF01494.19|3.1e-12,Toxin_13|PF07822.11|0.37 OFAVBQ_DN182056_c0_g1_i1:238-1683(-)	0.131	0	1	1	2	1	1	481	53.4	8.47	0	1	0.961	1.018	0.832	1.026	0.648	1.123	0.855	107.2	103	109.2	89.1	110	69.5	120.4	91.7	Low	Low	Low	Low	Low	Low	Low	Low
OFAVBQ_DN219934_c1_g2_i1.p1	type:internal	(+),score=1.33,PGBD5_HUMAN	High	32.143 1.42e-11,DDE_Tnp_1_7|PF13843.6|8.1e-13 OFAVBQ_DN219934_c1_g2_i1:1-312(+)	0.131	0	6	1	5	1	1	104	12.2	9.38	0	1																Low	Low	Low	Low	Low	Low	Low	Low
OFAVBQ_DN224530_c2_g2_i2.p1	type:complete	(-),score=59.98,DD19A_BOVIN	High	64.762 2.35e-162,Helicase_C|PF00271.31|5.4e+03,Helicase_C|PF00271.31|1.1e-25,Helicase_C|PF00271.31|2.4e+02,DEAD|PF00270.29|1.3e-17,ERCC3_RAD25_C|PF16203.5|0.16 OFAVBQ_DN224530_c2_g2_i2:197-1081(-)	0.151	0	6	2	2	2	1	294	33.4	8.21	0	2	1.249	0.875	0.859	0.722	0.639	0.572	0.632	122.2	152.6	106.9	105	88.2	78.1	69.9	77.3	Low	Low	Low	Low	Low	Low	Low	Low
OFAVBQ_DN220803_c1_g1_i3.p2	type:complete	(-),score=117.13,PYC_RAT	High	67.762 0.0,CPSase_L_D2|PF02786.17|3.8e-76,Biotin_carb_N|PF00289.22|4.2e-43,Biotin_carb_N|PF00289.22|3.8e+03,Biotin_carb_C|PF02785.19|1.1e-31,Dala_Dala_lig_C|PF07478.13|3.4e-09,ATP-grasp|PF02222.22|1.9e-06,ATPgrasp_ST|PF14397.6|0.00065,ATPgrasp_ST|PF14397.6|1.7e+03,ATP-grasp_3|PF02655.14|0.0056,RimK|PF08443.11|0.056,ATPgrasp_Ter|PF15632.6|0.3 OFAVBQ_DN220803_c1_g1_i3:3781-5598(-)	0.151	0	1	1	1	1	1	605	66.7	8.5	0	1																Low	Not Found	Low	Low	Low	Not Found	Low	Low
OFAVBQ_DN213170_c3_g1_i1.p2	type:complete	(+),score=4.86,DUF3689	High	PF12463.8 0.11 OFAVBQ_DN213170_c3_g1_i1:141-575(+)	0.178	0	7	1	1	1	1	144	15.8	9.64	0	1																Low	Not Found	Low	Low	Low	Low	Low	Low
OFAVBQ_DN224009_c3_g1_i6.p1	type:complete	(-),score=319.63,PK1L2_MOUSE	High	24.451 4.18e-69,PK1L2_MOUSE|28.145|9.38e-61,PKD_channel|PF08016.12|8.8e-81,REJ|PF02010.15|2.4e-36,F5_F8_type_C|PF00754.25|9.9e-25,Laminin_G_3|PF13385.6|1.3e-19,Laminin_G_3|PF13385.6|5.3e+03,Laminin_G_3|PF13385.6|1.3e+04,PLAT|PF01477.23|6.7e+03,PLAT|PF01477.23|5.2e-17,ILEI|PF15711.5|1e-16,Ion_trans|PF00520.31|1.9e+03,Ion_trans|PF00520.31|1.8e-15,GPS|PF01825.21|1.3e-05,MRVI1|PF05781.12|2.2e+02,MRVI…	0.172	0	0	2	2	2	1	2731	307.4	8.34	0	2	0.89	0.511	0.456	0.41	0.698	0.616	0.43	159.7	142.1	81.5	72.7	65.5	111.5	98.3	68.7	Low	Low	Low	Low	Low	Low	Low	Low
OFAVBQ_DN185617_c0_g3_i1.p1	type:complete	(-),score=11.49,HTH_48	High	PF17906.1 0.08 OFAVBQ_DN185617_c0_g3_i1:187-528(-)	0.178	0	14	2	9	2	1	113	13	10.52	0	2	0.01	1.063	1.734	1.461	1.27	1.36	1.278	87.3		92.8	151.3	127.5	110.8	118.7	111.5	Low	Low	Low	Low	Low	Low	Low	Low
OFAVBQ_DN217251_c0_g2_i2.p1	type:complete	(-),score=70.57,SH3R3_HUMAN	High	35.802 1.08e-30,SH3_9|PF14604.6|0.0045,SH3_9|PF14604.6|1.9e-12,SH3_1|PF00018.28|0.47,SH3_1|PF00018.28|2.7e-09,SH3_2|PF07653.17|0.28,SH3_2|PF07653.17|0.00089,SH3_2|PF07653.17|7.6e+03 OFAVBQ_DN217251_c0_g2_i2:1513-2697(-)	0.18	0	3	1	1	1	1	394	43	9.92	0	1																Low	Not Found	Low	Low	Low	Low	Low	Low
OFAVBQ_DN218581_c0_g1_i2.p1	type:5prime_partial	(-),score=66.53,KLHL3_DANRE	High	29.521 8.63e-44,Kelch_1|PF01344.25|2.9,Kelch_1|PF01344.25|0.00027,Kelch_1|PF01344.25|2.5e-09,Kelch_1|PF01344.25|1.7e-12,Kelch_1|PF01344.25|9.4e-05,Kelch_1|PF01344.25|0.078,Kelch_6|PF13964.6|4.8e+02,Kelch_6|PF13964.6|0.006,Kelch_6|PF13964.6|5e-08,Kelch_6|PF13964.6|3.4e-08,Kelch_6|PF13964.6|6.8,Kelch_6|PF13964.6|0.00017,Kelch_2|PF07646.15|0.0015,Kelch_2|PF07646.15|5.6e-06,Kelch_2|PF07646.15|2,Kelch…	0.18	0	2	1	1	1	1	392	44.6	8.19	0	1																Low	Low	Low	Low	Low	Low	Low	Low
OFAVBQ_DN222311_c0_g1_i5.p1	type:complete	(-),score=262.72,HECD3_MOUSE	High	47.255 7.92e-115,HECT|PF00632.25|1.2e-52,PCMT|PF01135.19|1.7e-24,DOT1|PF08123.13|0.0028,LicD|PF04991.13|6.3 OFAVBQ_DN222311_c0_g1_i5:1079-4999(-)	0.181	0	2	3	3	3	1	1306	146	7.49	0	3																Low	Low	Low	Low	Low	Low	Low	Low
OFAVBQ_DN212895_c4_g5_i1.p1	type:complete	(-),score=177.17,EMP24_GP25L	High	PF01105.24 20,EMP24_GP25L|PF01105.24|14 OFAVBQ_DN212895_c4_g5_i1:309-3062(-)	0.181	0	1	1	2	1	1	917	99.5	5.8	0	1																Low	Low	Low	Low	Low	Low	Low	Low
OFAVBQ_DN217327_c1_g1_i1.p1	type:5prime_partial	(-),score=5.13,TRHDE_RAT	High	51.852 6.34e-23,ERAP1_C|PF11838.8|6.5e-25 OFAVBQ_DN217327_c1_g1_i1:1108-1482(-)	0.181	0	9	1	5	1	1	124	14.1	6.52	0	1																Low	Not Found	Low	Low	Low	Low	Low	Low
OFAVBQ_DN220536_c0_g1_i5.p1	type:complete	(-),score=109.82,RPA2_HUMAN	High	53.437 0.0,RNA_pol_Rpb2_1|PF04563.15|3.1e-38,RNA_pol_Rpb2_3|PF04565.16|3.2e-29,RNA_pol_Rpb2_6|PF00562.28|2.5e-29,RNA_pol_Rpa2_4|PF06883.12|2.5e-19,RNA_pol_Rpb2_2|PF04561.14|4.4e-11 OFAVBQ_DN220536_c0_g1_i5:3316-5763(-)	0.182	0	1	1	1	1	1	815	91.5	8.24	0	1																Low	Low	Low	Low	Low	Low	Low	Low
OFAVBQ_DN194447_c0_g1_i1.p1	type:complete	(-),score=126.30,KAPC_YEAST	High	39.308 2.05e-67,Pkinase|PF00069.25|1.1e-61,cNMP_binding|PF00027.29|1.2e-18,cNMP_binding|PF00027.29|2.3e-22,cNMP_binding|PF00027.29|8.1e+03,Pkinase_Tyr|PF07714.17|1.4e-23,Kinase-like|PF14531.6|0.006 OFAVBQ_DN194447_c0_g1_i1:550-2718(-)	0.182	0	3	3	4	3	1	722	81.7	8.72	0	3	0.943	0.69	1.119	0.849	1.023	1.002	0.444	113.2	106.7	78.1	126.6	96	115.7	113.3	50.3	Low	Low	Low	Low	Low	Low	Low	Low
OFAVBQ_DN222333_c3_g1_i5.p1	type:complete	(-),score=165.78,ROCK2_MOUSE	High	41.696 3.36e-94,NAD_binding_2|PF03446.15|7.9e+02,NAD_binding_2|PF03446.15|1.3e+02,NAD_binding_2|PF03446.15|10,DUF1664|PF07889.12|3.2,DUF1664|PF07889.12|0.22,DUF1664|PF07889.12|1.1e+02,DUF1664|PF07889.12|7.7,DUF1664|PF07889.12|1.4e+03,DUF1664|PF07889.12|67,DUF1664|PF07889.12|0.55,DUF1664|PF07889.12|5.7e+02 OFAVBQ_DN222333_c3_g1_i5:3420-5165(-)	0.182	0	3	2	6	2	1	581	67.6	5.16	0	2																Low	Low	Low	Low	Low	Low	Low	Low
OFAVBQ_DN99444_c0_g1_i1.p1	type:internal	(-),score=40.19,ATP_bind_1	High	PF03029.17 0.026,ICAP-1_inte_bdg|PF10480.9|0.15,SWI-SNF_Ssr4|PF08549.10|2.4,DUF5582|PF17819.1|1.8e+03,DUF5582|PF17819.1|1.5 OFAVBQ_DN99444_c0_g1_i1:1-441(-)	0.179	0	5	1	1	1	1	147	15.5	9.28	0	1																Low	Low	Low	Low	Low	Low	Low	Low
OFAVBQ_DN272901_c0_g1_i1.p1	type:internal	(+),score=9.26,RVT_3	High	PF13456.6 0.002,RT_RNaseH|PF17917.1|0.012,RT_RNaseH_2|PF17919.1|0.09,HCV_NS5a|PF01506.19|0.25 OFAVBQ_DN272901_c0_g1_i1:2-298(+)	0.196	0	25	1	1	1	1	99	11.4	6.67	0	1																Not Found	Not Found	Not Found	Not Found	Not Found	Not Found	Not Found	Not Found
OFAVBQ_DN293617_c0_g1_i1.p1	type:internal	(+),score=8.39,Ca_hom_mod	High	PF14798.6 0.034 OFAVBQ_DN293617_c0_g1_i1:1-249(+)	0.19	0	10	1	1	1	1	83	9.3	8.84	0	1																Low	Not Found	Low	Low	Low	Low	Low	Low
OFAVBQ_DN215689_c0_g4_i1.p2	type:complete	(-),score=31.29,RIPL1_RAT	High	35.393 2.48e-20,Jnk-SapK_ap_N|PF09744.9|5.7e-27,Herpes_BLRF2|PF05812.12|1.5e+02,Herpes_BLRF2|PF05812.12|0.025,Filament|PF00038.21|8.8,Filament|PF00038.21|0.24,LPD5|PF18799.1|0.13,UPF0242|PF06785.11|0.18,APG6_N|PF17675.1|0.029,APG6_N|PF17675.1|1.1e+03,SHE3|PF17078.5|2.6,Atg14|PF10186.9|1.1,DUF641|PF04859.12|1.4e+03,DUF641|PF04859.12|0.26,YabA|PF06156.13|65,YabA|PF06156.13|19 OFAVBQ_DN215689_c0_g4_…	0.187	0	7	2	2	2	1	180	20.7	4.89	0	2																Low	Low	Low	Low	Low	Low	Low	Low
OFAVBQ_DN176273_c0_g1_i1.p1	type:internal	(-),score=30.34,PHF24_MOUSE	High	27.451 6.96e-18,Zf_RING|PF16744.5|5e-17,Zf_RING|PF16744.5|6.2e+03,EF-hand_6|PF13405.6|0.35,EF-hand_6|PF13405.6|0.036,EF-hand_6|PF13405.6|0.45,EF-hand_7|PF13499.6|2.3e-07,EF-hand_7|PF13499.6|70,EF-hand_8|PF13833.6|0.22,EF-hand_8|PF13833.6|0.023,EF-hand_8|PF13833.6|4.4e+02,EF-hand_1|PF00036.32|0.02,EF-hand_1|PF00036.32|2,EF-hand_1|PF00036.32|11,EF-hand_5|PF13202.6|0.5,EF-hand_5|PF13202.6|4.1,EF-han…	0.152	0	3	1	1	1	1	294	34.7	6.27	0	1																Low	Low	Low	Low	Low	Low	Low	Low
OFAVBQ_DN221267_c1_g1_i1.p1	type:complete	(-),score=103.92,PKHH2_HUMAN	High	35.542 1.00e-16,FAM76|PF16046.5|0.012,Exonuc_VII_L|PF02601.15|0.17,Exonuc_VII_L|PF02601.15|1.9e+02,Shugoshin_N|PF07558.11|0.21,CdvA|PF18822.1|0.037,CdvA|PF18822.1|6.9e+02,CdvA|PF18822.1|1.1e+03,Fib_alpha|PF08702.10|6.2,Fib_alpha|PF08702.10|0.32,Fib_alpha|PF08702.10|1.8e+03,UPF0231|PF06062.11|1.2e+03,UPF0231|PF06062.11|0.07,ApoO|PF09769.9|5,ApoO|PF09769.9|18,ApoO|PF09769.9|2.6e+03,Cep57_CLD|PF1407…	0.153	0	1	1	1	1	1	537	60.4	4.65	0	1																Low	Low	Low	Low	Low	Low	Low	Low
OFAVBQ_DN198744_c1_g1_i5.p1	type:5prime_partial	(-),score=72.01,CCD42_NEMVE	High	33.659 3.66e-22,DUF4200|PF13863.6|4.4e-28,DUF4200|PF13863.6|56,ABC_tran_CTD|PF16326.5|2.4e+03,ABC_tran_CTD|PF16326.5|0.00021,ABC_tran_CTD|PF16326.5|7.1e+02,ABC_tran_CTD|PF16326.5|1.6e+02,DUF1664|PF07889.12|1.3,DUF1664|PF07889.12|9.8,TPR_MLP1_2|PF07926.12|32,TPR_MLP1_2|PF07926.12|0.18,TPR_MLP1_2|PF07926.12|33,DUF4140|PF13600.6|2.6,DUF4140|PF13600.6|62,DUF4140|PF13600.6|2.6e+02,Jnk-SapK_ap_N|PF0974…	0.153	0	2	1	2	1	1	374	43.3	7.36	0	1																Low	Low	Low	Low	Low	Low	Low	Low
OFAVBQ_DN220293_c4_g2_i5.p1	type:complete	(-),score=111.49,TMTC1_HUMAN	High	41.800 0.0,TPR_1|PF00515.28|0.00061,TPR_1|PF00515.28|0.81,TPR_1|PF00515.28|0.00073,TPR_1|PF00515.28|0.00071,TPR_1|PF00515.28|0.0002,TPR_1|PF00515.28|0.022,TPR_1|PF00515.28|1.6e-05,TPR_1|PF00515.28|1.8,TPR_1|PF00515.28|3.4e-05,TPR_1|PF00515.28|0.0044,TPR_2|PF07719.17|3.2e-05,TPR_2|PF07719.17|20,TPR_2|PF07719.17|0.00063,TPR_2|PF07719.17|0.011,TPR_2|PF07719.17|0.0068,TPR_2|PF07719.17|0.062,TPR_2|PF0…	0.153	0	1	1	1	1	1	898	101.6	8.69	0	1																Low	Not Found	Low	Low	Low	Low	Low	Low
OFAVBQ_DN220052_c0_g1_i5.p1	type:3prime_partial	(-),score=256.33,Ribonuc_2-5A	High	PF06479.12 1,Ribonuc_2-5A|PF06479.12|1.9e+03 OFAVBQ_DN220052_c0_g1_i5:1-3069(-)	0.154	0	4	3	3	3	1	1023	115.2	8.98	0	3																Low	Low	Low	Low	Low	Low	Low	Low
OFAVBQ_DN217736_c1_g3_i2.p1	type:3prime_partial	(-),score=94.57,FLCN_HUMAN	High	46.259 3.43e-124,Folliculin_C|PF16692.5|1.2e-68,Folliculin|PF11704.8|1.7e-33,Folliculin|PF11704.8|6.2e+03 OFAVBQ_DN217736_c1_g3_i2:1-1242(-)	0.154	0	2	1	1	1	1	414	46.7	5.45	0	1																Low	Not Found	Low	Low	Low	Low	Low	Low
OFAVBQ_DN201416_c7_g1_i1.p1			High	OFAVBQ_DN201416_c7_g1~~OFAVBQ_DN201416_c7_g1_i1.p1 ORF type:5prime_partial len:89 (-),score=0.14 OFAVBQ_DN201416_c7_g1_i1:60-326(-)	0.154	0	9	1	1	1	1	88	10.1	4.89	0	1																Low	Not Found	Low	Low	Low	Low	Low	Low
OFAVBQ_DN211494_c0_g1_i5.p4	type:complete	(+),score=-1.40,Glyco_hydro_57	High	PF03065.15 0.11 OFAVBQ_DN211494_c0_g1_i5:362-592(+)	0.154	0	8	1	3	1	1	76	8.8	8.21	0	1	0.845	0.762	1.055	0.894	1.125	1.729	2.01	84.9	71.8	64.7	89.6	75.9	95.5	146.9	170.7	Low	Low	Low	Low	Low	Low	Low	Low
OFAVBQ_DN33931_c0_g1_i1.p1	type:5prime_partial	(-),score=5.59,7tm_1	High	PF00001.21 1.1e-06 OFAVBQ_DN33931_c0_g1_i1:71-322(-)	0.152	0	10	1	2	1	1	83	9.3	9.73	0	1																Low	Not Found	Low	Low	Low	Low	Low	Low
OFAVBQ_DN225345_c4_g1_i1.p1	type:complete	(-),score=926.95,DNHD1_HUMAN	High	27.100 3.29e-98,DNHD1_HUMAN|24.143|5.82e-88,DNHD1_HUMAN|26.368|7.06e-59,DNHD1_HUMAN|25.734|1.66e-43,DHC_N2|PF08393.13|9.1e+02,DHC_N2|PF08393.13|8.7e-79,DHC_N2|PF08393.13|1.6,AAA_6|PF12774.7|5.2e-37,AAA_6|PF12774.7|1.2e-23,AAA_6|PF12774.7|2.5e-11,AAA_8|PF12780.7|3e+03,AAA_8|PF12780.7|17,AAA_8|PF12780.7|1.7e+03,AAA_8|PF12780.7|4.5e-42,AAA_8|PF12780.7|3.6e+03,Dynein_C|PF18199.1|1.3e-36,AAA_7|PF12775…	0.155	0	1	4	13	4	1	5198	584.1	6.3	0	4																Low	Low	Low	Low	Low	Low	Low	Low
OFAVBQ_DN200210_c8_g1_i3.p1	type:complete	(-),score=9.10,MORN5_XENTR	High	62.500 3.46e-23,MORN|PF02493.20|0.11,MORN|PF02493.20|0.0036,MORN|PF02493.20|3.8e+02 OFAVBQ_DN200210_c8_g1_i3:1592-1954(-)	0.16	0	6	1	1	1	1	120	13.7	7.75	0	1																Low	Low	Low	Low	Low	Low	Low	Low
OFAVBQ_DN195101_c0_g2_i2.p1	type:complete	(-),score=8.59,ADA1A_ORYLA	High	30.952 1.13e-37,7tm_1|PF00001.21|5.7e-43,7TM_GPCR_Srx|PF10328.9|0.0025,DUF624|PF04854.14|3.3e+02,DUF624|PF04854.14|0.098,NICE-3|PF07406.11|6.3e+02,NICE-3|PF07406.11|1 OFAVBQ_DN195101_c0_g2_i2:224-1219(-)	0.151	0	2	1	1	1	1	331	37.2	9.72	0	1																Low	Not Found	Low	Low	Low	Low	Low	Low
OFAVBQ_DN223265_c0_g2_i2.p2	type:complete	(+),score=12.32,DUF1358	High	PF07096.11 0.043 OFAVBQ_DN223265_c0_g2_i2:3105-3317(+)	0.166	0	13	1	12	1	1	70	7.4	11.8	0	1																Low	Low	Low	Low	Low	Low	Low	Low
OFAVBQ_DN209266_c1_g2_i2.p1	type:complete	(-),score=48.61,ADA1A_RABIT	High	24.922 2.42e-16,7tm_1|PF00001.21|7.7e-27,7TM_GPCR_Srx|PF10328.9|72,7TM_GPCR_Srx|PF10328.9|0.11,Git3|PF11710.8|0.35,Git3|PF11710.8|8.5e+03 OFAVBQ_DN209266_c1_g2_i2:1355-2791(-)	0.167	0	2	1	23	1	1	478	53.6	8.59	0	1																Low	Low	Low	Low	Low	Low	Low	Low
OFAVBQ_DN217115_c2_g1_i2.p1	type:complete	(-),score=84.57,CCD83_MACFA	High	32.509 4.09e-39,DUF4618|PF15397.6|1.6e-08,Csm1_N|PF18504.1|0.34,Csm1_N|PF18504.1|7.6e+02,Csm1_N|PF18504.1|0.16,Csm1_N|PF18504.1|9.8e+02,Csm1_N|PF18504.1|2.5e+02,PikAIV_N|PF18605.1|0.67,DivIC|PF04977.15|1.2,DivIC|PF04977.15|0.85,DivIC|PF04977.15|2e+02,DivIC|PF04977.15|1.6e+03,DivIC|PF04977.15|5.8e+02,DUF3644|PF12358.8|1.3e+04,DUF3644|PF12358.8|4.6e+02,DUF3644|PF12358.8|0.72,DUF3644|PF12358.8|4.7e+…	0.167	0	2	1	1	1	1	300	34.8	6.68	0	1																Low	Not Found	Low	Low	Low	Low	Low	Low
OFAVBQ_DN199626_c0_g1_i3.p1	type:complete	(-),score=96.82,UBP38_HUMAN	High	37.685 1.17e-139,UCH|PF00443.29|2.1e-44,UCH_1|PF13423.6|7.2e-25 OFAVBQ_DN199626_c0_g1_i3:1615-3663(-)	0.167	0	2	2	2	2	1	682	75.7	5.97	0	2																Low	Not Found	Low	Low	Low	Low	Low	Low
OFAVBQ_DN224723_c4_g1_i2.p1	type:complete	(-),score=342.18,PTPRD_HUMAN	High	35.570 0.0,PTPRD_HUMAN|28.435|3.12e-51,PTPRD_HUMAN|26.474|4.16e-45,PTPRD_HUMAN|25.351|1.85e-43,PTPRD_HUMAN|25.255|2.29e-24,PTPRD_HUMAN|25.691|7.10e-11,Y_phosphatase|PF00102.27|2.9e-84,Y_phosphatase|PF00102.27|1.8e-79,fn3|PF00041.21|0.19,fn3|PF00041.21|0.00031,fn3|PF00041.21|1.5,fn3|PF00041.21|9e-12,fn3|PF00041.21|2.5e-12,fn3|PF00041.21|1.3e-15,fn3|PF00041.21|2.6e-07,fn3|PF00041.21|9.6e-12,fn3|PF0…	0.168	0	1	2	2	2	1	2435	270.8	7.05	0	2	1.803	0.864	1.539	0.988	0.999	1.295	0.965	84.6	152.6	73.1	130.3	83.6	84.5	109.6	81.6	Low	Low	Low	Low	Low	Low	Low	Low
OFAVBQ_DN210735_c3_g1_i4.p1	type:complete	(-),score=124.90,PRSR3_MOUSE	High	30.734 1.46e-08,FAM199X|PF15814.5|0.3,FAM199X|PF15814.5|4.5 OFAVBQ_DN210735_c3_g1_i4:397-2232(-)	0.166	0	2	1	1	1	1	611	67.7	9.23	0	1																Low	Not Found	Low	Low	Low	Low	Low	Low
OFAVBQ_DN209692_c1_g4_i1.p3			High	OFAVBQ_DN209692_c1_g4~~OFAVBQ_DN209692_c1_g4_i1.p3 ORF type:complete len:215 (-),score=42.33 OFAVBQ_DN209692_c1_g4_i1:173-817(-)	0.155	0	4	1	3	1	1	214	25	8.28	0	1																Low	Low	Low	Low	Low	Low	Low	Low
OFAVBQ_DN219531_c1_g1_i1.p1	type:complete	(-),score=51.46,AT1B1_RHIMB	High	29.225 5.29e-29,Na_K-ATPase|PF00287.18|3.2e-45 OFAVBQ_DN219531_c1_g1_i1:2214-3065(-)	0.156	0	7	1	1	1	1	283	31.7	5.45	0	1																Low	Not Found	Low	Low	Low	Low	Low	Low
OFAVBQ_DN174300_c0_g1_i1.p1			High	OFAVBQ_DN174300_c0_g1~~OFAVBQ_DN174300_c0_g1_i1.p1 ORF type:complete len:169 (-),score=15.57 OFAVBQ_DN174300_c0_g1_i1:180-686(-)	0.16	0	5	1	31	1	1	168	19.4	6.16	0	1																Low	Low	Low	Low	Low	Low	Low	Low
OFAVBQ_DN219029_c1_g2_i4.p1	type:complete	(-),score=59.82,HPDL_HUMAN	High	32.220 1.15e-58,Glyoxalase|PF00903.25|1.4e-06,Glyoxalase|PF00903.25|9.8e-06,Glyoxalase|PF00903.25|1.9e+03,Glyoxalase_4|PF13669.6|25,Glyoxalase_4|PF13669.6|3.2e-06,Glyoxalase_4|PF13669.6|1.3e+03,Glyoxalase_3|PF13468.6|20,Glyoxalase_3|PF13468.6|1.5e+03,Glyoxalase_3|PF13468.6|17 OFAVBQ_DN219029_c1_g2_i4:1412-2635(-)	0.159	0	2	1	2	1	1	407	44.6	6.11	0	1																Low	Low	Low	Low	Low	Low	Low	Low
OFAVBQ_DN4784_c0_g1_i1.p1	type:internal	(-),score=22.49,SPTCB_DROME	High	81.818 5.63e-63,SPTCB_DROME|25.664|8.56e-09,Spectrin|PF00435.21|9.5e-16,Spectrin|PF00435.21|0.0075 OFAVBQ_DN4784_c0_g1_i1:2-364(-)	0.189	0	7	1	3	1	1	121	14.2	5.34	0	1																Low	Not Found	Low	Low	Low	Low	Low	Low
OFAVBQ_DN199672_c0_g1_i1.p1	type:complete	(-),score=17.79,BARX1_CHICK	High	45.631 9.50e-21,Homeodomain|PF00046.29|2.4e+03,Homeodomain|PF00046.29|9.5e-23,CENP-B_N|PF04218.13|0.014,Homeobox_KN|PF05920.11|0.015 OFAVBQ_DN199672_c0_g1_i1:1371-2036(-)	0.184	0	3	1	1	1	1	221	25.7	9.83	0	1																Not Found	Not Found	Low	Low	Not Found	Low	Not Found	Low
OFAVBQ_DN224058_c3_g1_i2.p1			High	OFAVBQ_DN224058_c3_g1~~OFAVBQ_DN224058_c3_g1_i2.p1 ORF type:complete len:171 (-),score=28.63 OFAVBQ_DN224058_c3_g1_i2:691-1203(-)	0.185	0	6	1	1	1	1	170	19.9	9.73	0	1																Low	Not Found	Low	Low	Low	Low	Low	Low
OFAVBQ_DN225392_c6_g1_i2.p3			High	OFAVBQ_DN225392_c6_g1~~OFAVBQ_DN225392_c6_g1_i2.p3 ORF type:complete len:85 (+),score=2.38 OFAVBQ_DN225392_c6_g1_i2:412-666(+)	0.186	0	11	1	1	1	1	84	10	9.8	0	1	0.647	0.222	0.099	0.167	0.097	0.148	0.221	307.5	199	68.3	30.4	51.5	29.9	45.5	68	Low	Low	Low	Low	Low	Low	Low	Low
OFAVBQ_DN218138_c3_g2_i8.p2			High	OFAVBQ_DN218138_c3_g2~~OFAVBQ_DN218138_c3_g2_i8.p2 ORF type:complete len:281 (-),score=48.45 OFAVBQ_DN218138_c3_g2_i8:706-1548(-)	0.186	0	4	1	2	1	1	280	30.8	9.67	0	1																Low	Low	Low	Low	Low	Low	Low	Low
OFAVBQ_DN208114_c2_g1_i6.p1	type:internal	(-),score=33.80,NRX4_DROME	High	39.437 7.90e-42,COLFI|PF01410.18|0.0027,Fibrinogen_C|PF00147.18|0.002,I-set|PF07679.16|0.031,I-set|PF07679.16|4.6e+02,Ig_3|PF13927.6|0.25,Ig_3|PF13927.6|3.7e+03,Ig_3|PF13927.6|1e+03,ig|PF00047.25|0.085,ig|PF00047.25|3.2e+03,V-set_CD47|PF08204.11|0.26,V-set_CD47|PF08204.11|3.9e+03 OFAVBQ_DN208114_c2_g1_i6:1-702(-)	0.186	0	4	1	1	1	1	234	25.3	5.8	0	1																Low	Low	Low	Low	Low	Low	Low	Low
OFAVBQ_DN215311_c0_g3_i1.p1	type:complete	(-),score=74.93,LONF3_MOUSE	High	29.256 2.44e-74,LON_substr_bdg|PF02190.16|7.4e-08,zf-C3HC4_2|PF13923.6|1.1e+02,zf-C3HC4_2|PF13923.6|7.6e-08,zf-RING_UBOX|PF13445.6|0.028,zf-RING_UBOX|PF13445.6|5.1e+03,zf-RING_UBOX|PF13445.6|1.1e-05,zf-RING_10|PF16685.5|66,zf-RING_10|PF16685.5|1.7e-07,zf-RING_5|PF14634.6|3.5e+03,zf-RING_5|PF14634.6|3.3,zf-RING_5|PF14634.6|5.9e-06,zf-C3HC4|PF00097.25|1.3,zf-C3HC4|PF00097.25|1e-05,zf-C3HC4_4|PF1522…	0.187	0	1	1	1	1	1	671	76.4	7.87	0	1																Low	Not Found	Low	Low	Low	Not Found	Low	Low
OFAVBQ_DN49126_c0_g1_i1.p1	type:3prime_partial	(-),score=1.28,zf-C4_Topoisom	High	PF01396.19 0.15 OFAVBQ_DN49126_c0_g1_i1:2-292(-)	0.188	0	26	1	1	1	1	97	11.4	10.24	0	1																Low	Not Found	Low	Low	Low	Low	Low	Low
OFAVBQ_DN191814_c0_g1_i2.p1	type:complete	(-),score=202.08,ZCPW1_HUMAN	High	29.143 3.22e-39,PWWP|PF00855.17|1.2e+04,PWWP|PF00855.17|2.1e-14,PWWP|PF00855.17|9.7e+03,PWWP|PF00855.17|2e+03,zf-CW|PF07496.15|6.5e-13 OFAVBQ_DN191814_c0_g1_i2:401-3322(-)	0.188	0	1	1	1	1	1	973	107.4	8.65	0	1																Not Found	Not Found	Low	Low	Low	Low	Not Found	Low
OFAVBQ_DN108054_c0_g1_i1.p1	type:complete	(-),score=76.29,MATN2_MOUSE	High	36.957 2.83e-18,MATN2_MOUSE|26.712|1.33e-06,VWA|PF00092.28|4.7e-32,VWA_2|PF13519.6|1.5e-14,VWA_3|PF13768.6|0.048,Presenilin|PF01080.17|0.33,DUF4604|PF15377.6|6.4,CDC45|PF02724.14|10,Folate_carrier|PF01770.18|1.7e+03,Folate_carrier|PF01770.18|4.9 OFAVBQ_DN108054_c0_g1_i1:103-1479(-)	0.189	0	2	2	5	2	1	458	51.7	8.79	0	2																Low	Low	Low	Low	Low	Low	Low	Low
OFAVBQ_DN222054_c5_g1_i3.p1	type:complete	(-),score=126.30,AOC1_RAT	High	40.463 0.0,Cu_amine_oxid|PF01179.20|2.7e-118,Cu_amine_oxidN2|PF02727.16|5.7e-11,Cu_amine_oxidN2|PF02727.16|7.9e+02,DUF1965|PF09248.10|0.00022,DUF1965|PF09248.10|4.2e+03,Pepdidase_M14_N|PF18027.1|8.7,Pepdidase_M14_N|PF18027.1|4.7,Amidinotransf|PF02274.17|0.36,TMEM154|PF15102.6|0.4,TMEM154|PF15102.6|5.8e+03 OFAVBQ_DN222054_c5_g1_i3:1793-4204(-)	0.171	0	3	1	1	1	1	803	90.9	6.16	0	1	2.2	1.298	0.553	1.067	0.678	0.579	0.875	97	213.3	125.9	53.6	103.4	65.7	56.2	84.8	Low	Low	Low	Low	Low	Low	Low	Low
OFAVBQ_DN210615_c1_g1_i5.p2	type:complete	(-),score=42.69,Death	High	PF00531.22 2.7e-11,Death|PF00531.22|1.4e-09,ZU5|PF00791.20|6.8e+03,ZU5|PF00791.20|1.4e-05,ZU5|PF00791.20|1.8e+02,ADK_lid|PF05191.14|13,ADK_lid|PF05191.14|15,DAGAT|PF03982.13|0.4,DAGAT|PF03982.13|1.7e+02,FTO_CTD|PF12934.7|4.4,FTO_CTD|PF12934.7|19,Fungal_KA1|PF16797.5|18,Fungal_KA1|PF16797.5|24,SKA2|PF16740.5|30,SKA2|PF16740.5|7.9,SKA2|PF16740.5|4.7e+03,ATG16|PF08614.11|21,ATG16|PF08614.11|3.8,Arm-…	0.171	0	1	1	5	1	1	411	47.1	8.22	0	1																Low	Not Found	Low	Low	Low	Low	Low	Low
OFAVBQ_DN203540_c3_g1_i3.p1	type:5prime_partial	(-),score=94.29,SUCB2_PIG	High	67.150 0.0,ATP-grasp_2|PF08442.10|1.5e-73,Ligase_CoA|PF00549.19|1.9e-23,ATP-grasp_5|PF13549.6|8.3e-10,GARS_A|PF01071.19|0.0036,GARS_A|PF01071.19|3.9e+03,GARS_A|PF01071.19|1.3e+03 OFAVBQ_DN203540_c3_g1_i3:625-1950(-)	0.171	0	4	2	3	2	1	441	48.1	6.47	0	2																Low	Not Found	Low	Low	Low	Low	Low	Low
OFAVBQ_DN215394_c0_g1_i1.p1	type:5prime_partial	(-),score=274.71,CBM_14	High	PF01607.24 7e-10,CBM_14|PF01607.24|2.7e-07 OFAVBQ_DN215394_c0_g1_i1:482-4588(-)	0.157	0	0	1	1	1	1	1368	149.3	6	0	1																Low	Low	Low	Low	Low	Low	Low	Low
OFAVBQ_DN264622_c0_g1_i1.p1	type:internal	(-),score=16.46,KS6B_CAEEL	High	78.947 2.25e-36,Pkinase|PF00069.25|2.6e-10,Pkinase_Tyr|PF07714.17|1.7e-05,FTA2|PF13095.6|0.013,Serpin|PF00079.20|0.024 OFAVBQ_DN264622_c0_g1_i1:3-239(-)	0.157	0	10	1	2	1	1	79	8.8	9.99	0	1	1.041	1.225	1.027	1.095	1.573	2.559	1.01	76	79.1	93.1	78	83.2	119.5	194.4	76.7	Low	Low	Low	Low	Low	Low	Low	Low
OFAVBQ_DN224023_c2_g1_i1.p1	type:5prime_partial	(-),score=110.26,Y2800_NOSS1	High	23.014 6.27e-07,NACHT|PF05729.12|4.7e-08,NACHT|PF05729.12|1.8e+03,NACHT|PF05729.12|1.6e+03,AAA_22|PF13401.6|3.5e-06,AAA_22|PF13401.6|2.1e+03,AAA|PF00004.29|1.8e-05,AAA|PF00004.29|2.6e+03,AAA_16|PF13191.6|0.011,AAA_16|PF13191.6|1.6e+02,TniB|PF05621.11|0.0017,TniB|PF05621.11|4.5e+03,ATPase_2|PF01637.18|0.27,ATPase_2|PF01637.18|15,IstB_IS21|PF01695.17|0.019,IstB_IS21|PF01695.17|4.1e+03,DnaB_C|PF0379…	0.156	0	1	1	1	1	1	776	87.6	6.43	0	1	0.01	0.869	1.256	0.632	0.941	0.777	1.081	122		106	153.2	77.1	114.8	94.9	131.9	Low	Not Found	Low	Low	Low	Low	Low	Low
OFAVBQ_DN215809_c5_g1_i8.p1	type:3prime_partial	(-),score=136.40,Spc7	High	PF08317.11 2.3e+03,Spc7|PF08317.11|0.0051,Spc7|PF08317.11|8.1e+02,Laminin_II|PF06009.12|0.024,Laminin_II|PF06009.12|8.8e+03,NPV_P10|PF05531.12|1.2,V_ATPase_I|PF01496.19|0.59,Fib_alpha|PF08702.10|0.69,Fib_alpha|PF08702.10|2.5e+03,Exonuc_VII_L|PF02601.15|0.33,Exonuc_VII_L|PF02601.15|1.7e+03,DUF4685|PF15737.5|0.46,DUF4685|PF15737.5|1.7e+03,FliD_N|PF02465.18|4.5,FliD_N|PF02465.18|4.6e+03 OFAVBQ_DN215…	0.158	0	2	1	9	1	1	727	81.5	6.06	0	1																Low	Low	Low	Low	Low	Low	Low	Low
OFAVBQ_DN218196_c3_g1_i6.p1	type:complete	(-),score=13.84,CTL4_DANRE	High	55.462 1.53e-33,Choline_transpo|PF04515.12|4.4e-30,DUF2627|PF11118.8|2.2,DUF2627|PF11118.8|11 OFAVBQ_DN218196_c3_g1_i6:1835-2176(-)	0.159	0	12	1	1	1	1	113	12.8	8.91	0	1																Low	Not Found	Low	Low	Low	Low	Low	Low
OFAVBQ_DN207658_c3_g1_i2.p2	type:complete	(-),score=17.03,GTPB1_PONAB	High	50.000 4.05e-20 OFAVBQ_DN207658_c3_g1_i2:739-1053(-)	0.159	0	6	1	2	1	1	104	11.6	11.21	0	1																Low	Low	Low	Low	Low	Low	Low	Low
OFAVBQ_DN196223_c0_g3_i1.p1	type:internal	(-),score=47.38,ZNFX1_MOUSE	High	42.248 1.08e-42,ZNFX1_MOUSE|30.924|1.26e-09,ZNFX1_MOUSE|32.673|4.64e-08 OFAVBQ_DN196223_c0_g3_i1:1-1365(-)	0.13	0	2	1	1	1	1	455	50	7.99	0	1																Low	Not Found	Not Found	Low	Low	Not Found	Not Found	Low
OFAVBQ_DN217152_c1_g2_i4.p6			High	OFAVBQ_DN217152_c1_g2~~OFAVBQ_DN217152_c1_g2_i4.p6 ORF type:complete len:86 (-),score=10.41 OFAVBQ_DN217152_c1_g2_i4:1953-2210(-)	0.129	0	58	2	2	2	1	85	9.7	9.69	0	2	1.613	0.769	0.349	0.19	0.309	0.199	0.329	168.1	271.3	129.3	58.7	32	51.9	33.4	55.3	Low	Low	Low	Low	Low	Low	Low	Low
OFAVBQ_DN214640_c0_g1_i1.p1	type:complete	(-),score=24.83,RPB11_MOUSE	High	79.487 1.01e-68,RNA_pol_L_2|PF13656.6|5.3e-29,RNA_pol_L|PF01193.24|1.9e-11,SHNi-TPR|PF10516.9|2.1e+02,SHNi-TPR|PF10516.9|0.018 OFAVBQ_DN214640_c0_g1_i1:3295-3648(-)	0.129	0	20	1	1	1	1	117	13.3	5.81	0	1	0.01	7.792	1.2	0.839	0.862	0.981	0.895	59		459.4	70.8	49.4	50.8	57.8	52.8	Low	Not Found	Low	Low	Low	Low	Low	Low
OFAVBQ_DN224278_c3_g3_i1.p1	type:internal	(-),score=17.70,WHRN_HUMAN	High	41.250 3.23e-11 OFAVBQ_DN224278_c3_g3_i1:3-251(-)	0.129	0	23	2	2	1	1	83	9	8.92	0	2																Low	Not Found	Low	Low	Low	Low	Low	Low
OFAVBQ_DN223003_c3_g2_i11.p1	type:complete	(-),score=26.45,MED22_DANRE	High	66.187 1.06e-63,Med22|PF06179.12|1.4e-33,CTNNB1_binding|PF08347.11|0.052,rRNA_processing|PF08524.11|0.077,PBECR1|PF18809.1|0.36,PBECR1|PF18809.1|2.3e+03 OFAVBQ_DN223003_c3_g2_i11:723-1148(-)	0.139	0	8	1	1	1	1	141	16.2	5.34	0	1																Not Found	Not Found	Not Found	Not Found	Not Found	Not Found	Not Found	Not Found
OFAVBQ_DN203914_c1_g1_i1.p3			High	OFAVBQ_DN203914_c1_g1~~OFAVBQ_DN203914_c1_g1_i1.p3 ORF type:complete len:126 (+),score=9.07 OFAVBQ_DN203914_c1_g1_i1:1994-2371(+)	0.138	0	6	1	1	1	1	125	14.5	7.96	0	1																Low	Not Found	Low	Low	Low	Low	Not Found	Low
OFAVBQ_DN140209_c0_g2_i1.p1			High	OFAVBQ_DN140209_c0_g2~~OFAVBQ_DN140209_c0_g2_i1.p1 ORF type:5prime_partial len:96 (+),score=0.15 OFAVBQ_DN140209_c0_g2_i1:3-290(+)	0.136	0	9	1	1	1	1	95	10.7	9.09	0	1																Low	Low	Low	Low	Low	Low	Low	Low
OFAVBQ_DN211608_c5_g10_i1.p2			High	OFAVBQ_DN211608_c5_g10~~OFAVBQ_DN211608_c5_g10_i1.p2 ORF type:5prime_partial len:71 (-),score=5.06 OFAVBQ_DN211608_c5_g10_i1:519-731(-)	0.136	0	17	2	2	2	1	70	8.3	11.22	0	2																Low	Low	Low	Low	Low	Low	Low	Low
OFAVBQ_DN212898_c0_g1_i1.p1	type:complete	(-),score=351.05,PP1_bind	High	PF15276.6 2e-13,PP1_bind|PF15276.6|2.3e+02,PP1_bind|PF15276.6|2.6e+03,PP1_bind|PF15276.6|3.6e+03,PP1_bind|PF15276.6|1.3e+03,PP1_bind|PF15276.6|8.1e+03,PP1_bind|PF15276.6|9.4e+03,PP1_bind|PF15276.6|1.3e+04,PP1_bind|PF15276.6|4e+03 OFAVBQ_DN212898_c0_g1_i1:867-6455(-)	0.136	0	1	2	2	2	1	1862	207	10.11	0	2	1.592	0.743	0.76	0.731	0.796	0.831	0.85	109.6	174.4	81.4	83.3	80	87.2	91	93.1	Low	Low	Low	Low	Low	Low	Low	Low
OFAVBQ_DN209149_c1_g3_i1.p1	type:complete	(-),score=84.89,THOC7	High	PF05615.13 0.082,DUF2959|PF11172.8|0.093,DUF5595|PF18077.1|6.1,DUF5595|PF18077.1|33 OFAVBQ_DN209149_c1_g3_i1:1385-2848(-)	0.136	0	2	1	1	1	1	487	55.7	7.15	0	1																Low	Not Found	Low	Low	Low	Low	Low	Low
OFAVBQ_DN220467_c1_g1_i9.p1	type:complete	(-),score=458.05,CO1A2_RAT	High	42.793 1.54e-159,CO1A2_RAT|43.017|8.33e-87,CO1A2_RAT|43.199|2.87e-72,CO1A2_RAT|41.627|1.57e-71,CO1A2_RAT|41.144|2.34e-57,CO1A2_RAT|42.935|9.77e-43,CO1A2_RAT|46.715|6.74e-18,Collagen|PF01391.18|4.5e-08,Collagen|PF01391.18|1.4e-07,Collagen|PF01391.18|1e-07,Collagen|PF01391.18|0.16,Collagen|PF01391.18|0.12,Collagen|PF01391.18|0.00017,Collagen|PF01391.18|8.3e-06,Collagen|PF01391.18|1.8e+04,Collagen|P…	0.137	0	2	3	5	3	1	1619	159.8	8.95	0	3																Low	Low	Low	Low	Low	Low	Low	Low
OFAVBQ_DN202351_c0_g1_i1.p1	type:5prime_partial	(+),score=21.80,Tom37_C	High	PF11801.8 0.22 OFAVBQ_DN202351_c0_g1_i1:3-269(+)	0.137	0	9	1	2	1	1	88	10.6	10.54	0	1																Low	Not Found	Low	Low	Low	Low	Low	Low
OFAVBQ_DN201045_c7_g1_i2.p1	type:complete	(-),score=51.59,RHO1_KLULA	High	43.716 8.95e-43,Ras|PF00071.22|1.1e-33,Roc|PF08477.13|8.2e-16,MMR_HSR1|PF01926.23|0.00037,MMR_HSR1|PF01926.23|6.9e+03,Dynamin_N|PF00350.23|0.0003,Arf|PF00025.21|0.015,RsgA_GTPase|PF03193.16|0.049,SRPRB|PF09439.10|0.097,ABC_tran|PF00005.27|0.1,FeoB_N|PF02421.18|0.24 OFAVBQ_DN201045_c7_g1_i2:240-1172(-)	0.142	0	2	1	3	1	1	310	34.3	5.05	0	1																Low	Low	Low	Low	Low	Low	Low	Low
OFAVBQ_DN218190_c3_g1_i6.p1	type:complete	(-),score=116.41,TNPO3_MOUSE	High	48.753 0.0,Xpo1|PF08389.12|2.7e-23,Xpo1|PF08389.12|5.6e+02,Xpo1|PF08389.12|6.8e+03,IBN_N|PF03810.19|0.0059,SesA|PF17107.5|70,SesA|PF17107.5|2.9e+03,SesA|PF17107.5|12 OFAVBQ_DN218190_c3_g1_i6:2684-5143(-)	0.137	0	1	1	1	1	1	819	91.4	5.77	0	1																Not Found	Not Found	Not Found	Not Found	Not Found	Not Found	Not Found	Not Found
OFAVBQ_DN140352_c0_g1_i1.p1	type:internal	(-),score=33.53,RL6_PIG	High	52.174 2.35e-50,Ribosomal_L6e|PF01159.19|1.5e+03,Ribosomal_L6e|PF01159.19|2.8e-22 OFAVBQ_DN140352_c0_g1_i1:1-489(-)	0.138	0	9	2	3	2	1	163	18.2	10.42	0	2																Low	Low	Low	Low	Low	Low	Low	Low
OFAVBQ_DN232951_c0_g1_i1.p1			High	OFAVBQ_DN232951_c0_g1~~OFAVBQ_DN232951_c0_g1_i1.p1 ORF type:internal len:93 (-),score=3.23 OFAVBQ_DN232951_c0_g1_i1:2-277(-)	0.138	0	14	1	1	1	1	92	10.6	9.17	0	1																Not Found	Not Found	Not Found	Not Found	Not Found	Not Found	Not Found	Not Found
OFAVBQ_DN223315_c1_g1_i3.p1	type:complete	(-),score=177.25,TSP3_HUMAN	High	39.158 0.0,TSP_C|PF05735.12|2.7e-68,TSP_3|PF02412.18|2.1,TSP_3|PF02412.18|1.2e-07,TSP_3|PF02412.18|0.0072,TSP_3|PF02412.18|3.8e-13,TSP_3|PF02412.18|0.011,TSP_3|PF02412.18|3.5e-09,TSP_3|PF02412.18|1.8e-08,TSP_3|PF02412.18|3.5e-10,EGF_CA|PF07645.15|13,EGF_CA|PF07645.15|4.6e-06,EGF_CA|PF07645.15|2.5e-08,EGF_CA|PF07645.15|55,EGF_3|PF12947.7|0.018,EGF_3|PF12947.7|0.029,EGF_3|PF12947.7|0.0004,EGF_3|PF1…	0.135	0	1	1	1	1	1	1015	112.9	5.35	0	1																Low	Not Found	Low	Low	Low	Low	Low	Low
OFAVBQ_DN221409_c1_g2_i11.p1	type:complete	(-),score=319.98,LRRK1_MOUSE	High	30.490 0.0,Pkinase|PF00069.25|5.9,Pkinase|PF00069.25|6.9e-33,Pkinase|PF00069.25|7.9e+03,Pkinase_Tyr|PF07714.17|13,Pkinase_Tyr|PF07714.17|1.9e-29,LRR_8|PF13855.6|9.4e+03,LRR_8|PF13855.6|3.7e-09,LRR_8|PF13855.6|0.7,LRR_8|PF13855.6|0.0038,LRR_8|PF13855.6|1.7e+02,LRR_8|PF13855.6|5.9e-09,LRR_8|PF13855.6|0.0054,COR|PF16095.5|3.6e-27,Ank_2|PF12796.7|9e-11,Ank_2|PF12796.7|5e-07,Ank_2|PF12796.7|9.6e+03,LR…	0.143	0	1	2	2	2	1	2409	268.8	6.15	0	2	2.392	0.567	1.114	1.001	0.77	0.917	0.786	93.6	223.9	53.1	104.3	93.7	72.1	85.8	73.5	Low	Low	Low	Low	Low	Low	Low	Low
OFAVBQ_DN122661_c0_g1_i1.p1	type:internal	(-),score=13.26,ECHA_HUMAN	High	62.637 8.76e-31,3HCDH_N|PF02737.18|4.6e+03,3HCDH_N|PF02737.18|7.8e-07,2-Hacid_dh_C|PF02826.19|0.057,NAD_binding_2|PF03446.15|0.074,F420_oxidored|PF03807.17|0.13,Shikimate_DH|PF01488.20|0.13 OFAVBQ_DN122661_c0_g1_i1:3-278(-)	0.147	0	13	1	1	1	1	92	10	9.03	0	1																Low	Not Found	Low	Low	Low	Not Found	Low	Not Found
OFAVBQ_DN222309_c0_g3_i2.p1	type:complete	(-),score=68.33,CNBD2_HUMAN	High	33.790 1.69e-28,cNMP_binding|PF00027.29|9.9e-16,cNMP_binding|PF00027.29|1.3e+02,cNMP_binding|PF00027.29|2.6e+03 OFAVBQ_DN222309_c0_g3_i2:2492-4453(-)	0.148	0	2	1	1	1	1	653	74.1	9.77	0	1																Low	Not Found	Low	Low	Low	Low	Low	Low
OFAVBQ_DN300472_c0_g1_i1.p1	type:3prime_partial	(-),score=34.27,ATNA_DROME	High	64.455 7.64e-89,Cation_ATPase_N|PF00690.26|1.2e-20,E1-E2_ATPase|PF00122.20|1.3e+02,E1-E2_ATPase|PF00122.20|0.0034,Transp_cyt_pur|PF02133.15|0.0079 OFAVBQ_DN300472_c0_g1_i1:2-637(-)	0.148	0	3	1	1	1	1	212	23.8	5.74	0	1																Low	Low	Low	Low	Low	Low	Low	Low
OFAVBQ_DN219115_c0_g1_i16.p3	type:complete	(-),score=41.31,FKB15_HUMAN	High	53.390 2.11e-75,WH1|PF00568.23|2.8e-06,WH1|PF00568.23|3.9e+02,FKBP_C|PF00254.28|1.1e-05,VID27_PH|PF17747.1|0.11,DCP1|PF06058.13|0.13 OFAVBQ_DN219115_c0_g1_i16:6410-7246(-)	0.147	0	3	1	1	1	1	278	30.2	7.8	0	1																Low	Low	Low	Low	Low	Low	Low	Low
OFAVBQ_DN223530_c1_g2_i2.p1	type:5prime_partial	(-),score=375.28,NUP98_HUMAN	High	36.684 0.0,NUP98_HUMAN|30.909|1.10e-12,NUP98_HUMAN|39.634|2.21e-06,Nup96|PF12110.8|3.8e-99,Nucleoporin2|PF04096.14|9e-43 OFAVBQ_DN223530_c1_g2_i2:1010-6031(-)	0.138	0	1	1	8	1	1	1673	182.3	6.28	0	1																Low	Low	Low	Low	Low	Low	Low	Low
OFAVBQ_DN201173_c2_g2_i3.p1	type:5prime_partial	(-),score=49.66,MOV10_CHICK	High	53.005 5.73e-112,AAA_12|PF13087.6|1.3e-36,AAA_11|PF13086.6|0.19,AAA_11|PF13086.6|7.3e-14,AAA_11|PF13086.6|2.7e+03,AAA_30|PF13604.6|0.0036,Imm61|PF15598.6|0.33 OFAVBQ_DN201173_c2_g2_i3:1258-2352(-)	0.141	0	2	1	1	1	1	364	42.2	8.34	0	1	0.899	1.642	1.011	0.944	0.772	1.183	1.34	91	81.8	149.4	92	85.9	70.2	107.7	121.9	Low	Low	Low	Low	Low	Low	Low	Low
OFAVBQ_DN205416_c4_g2_i3.p1	type:complete	(-),score=46.09,DEAF1_DROME	High	63.889 2.26e-46,SAND|PF01342.21|4.4e-26 OFAVBQ_DN205416_c4_g2_i3:2196-3227(-)	0.079	0	5	2	2	2	1	343	36.9	6.18	0	2																Low	Low	Low	Low	Low	Low	Low	Low
OFAVBQ_DN227192_c0_g1_i1.p1	type:internal	(-),score=16.13,ACVR1_CHICK	High	50.820 9.69e-15 OFAVBQ_DN227192_c0_g1_i1:1-276(-)	0.141	0	9	1	2	1	1	92	10.6	9.58	0	1																Low	Low	Low	Low	Low	Low	Low	Low
OFAVBQ_DN222237_c0_g2_i1.p1	type:5prime_partial	(+),score=-1.93,Patched	High	PF02460.18 0.0057,ETRAMP|PF09716.10|0.14 OFAVBQ_DN222237_c0_g2_i1:2-244(+)	0.27	0	8	1	4	1	1	80	9	10.07	0	1	1.498	1.329	2.239	0.513	1.405	0.921	0.936	81.3	121.8	108	182	41.7	114.2	74.9	76.1	Low	Low	Low	Low	Low	Low	Low	Low
OFAVBQ_DN205898_c3_g4_i1.p1	type:internal	(-),score=33.94,AGO2_RAT	High	46.269 3.14e-16,ArgoN|PF16486.5|2.5e-08 OFAVBQ_DN205898_c3_g4_i1:1-495(-)	0.277	0	4	1	4	1	1	165	17.6	10.1	0	1																Low	Low	Low	Low	Low	Low	Low	Low
OFAVBQ_DN156601_c0_g1_i1.p1	type:complete	(-),score=58.84,KARG_STIJA	High	46.307 4.15e-103,ATP-gua_Ptrans|PF00217.19|2.3e-74,ATP-gua_PtransN|PF02807.15|1.1e-14 OFAVBQ_DN156601_c0_g1_i1:97-1161(-)	0.28	0	3	1	1	1	1	354	39	6.6	0	1																Low	Low	Low	Low	Low	Low	Low	Low
OFAVBQ_DN201184_c2_g7_i1.p2			High	OFAVBQ_DN201184_c2_g7~~OFAVBQ_DN201184_c2_g7_i1.p2 ORF type:internal len:73 (+),score=7.79 OFAVBQ_DN201184_c2_g7_i1:2-217(+)	0.268	0	18	1	1	1	1	72	8.2	9.91	0	1																Not Found	Not Found	Low	Not Found	Not Found	Not Found	Not Found	Low
OFAVBQ_DN204730_c0_g1_i1.p1			High	OFAVBQ_DN204730_c0_g1~~OFAVBQ_DN204730_c0_g1_i1.p1 ORF type:complete len:391 (-),score=113.92 OFAVBQ_DN204730_c0_g1_i1:1422-2594(-)	0.257	0	2	1	17	1	1	390	40.6	5.05	0	1																Low	Low	Low	Low	Low	Low	Low	Low
OFAVBQ_DN222743_c1_g1_i6.p1	type:5prime_partial	(-),score=33.47,BRICHOS	High	PF04089.14 4.4e-14,PHM7_cyt|PF14703.6|0.084,PHM7_cyt|PF14703.6|2.3e+02,Psb28|PF03912.14|0.18,ETRAMP|PF09716.10|0.27 OFAVBQ_DN222743_c1_g1_i6:171-797(-)	0.26	0	3	1	1	1	1	208	23.9	7.59	0	1																Low	Low	Low	Low	Low	Low	Low	Low
OFAVBQ_DN205820_c4_g1_i9.p2	type:3prime_partial	(-),score=45.68,KPCA_RAT	High	76.852 3.39e-120,Pkinase|PF00069.25|4.7e-48,Pkinase_Tyr|PF07714.17|5e-25,Kinase-like|PF14531.6|4.2e-07,Pkinase_C|PF00433.24|0.032,Haspin_kinase|PF12330.8|0.036,APH|PF01636.23|0.17,Pkinase_fungal|PF17667.1|0.15 OFAVBQ_DN205820_c4_g1_i9:2-661(-)	0.264	0	7	1	4	1	1	220	25.3	5.81	0	1																Low	Not Found	Low	Low	Low	Low	Low	Low
OFAVBQ_DN222178_c2_g1_i2.p1	type:complete	(-),score=126.83,DUSTY_TAKRU	High	20.031 2.25e-13,Pkinase|PF00069.25|3.3e-06,Pkinase_Tyr|PF07714.17|0.028,Arf|PF00025.21|0.24,Arf|PF00025.21|8.5e+03 OFAVBQ_DN222178_c2_g1_i2:1833-4067(-)	0.284	0	2	2	4	2	1	744	84.6	7.14	0	2	0.567	1.063	1.47	0.693	2.101	0.707	0.722	96.1	54.5	102.2	141.2	66.6	201.9	68	69.4	Low	Low	Low	Low	Low	Low	Low	Low
OFAVBQ_DN211277_c1_g2_i1.p1	type:complete	(-),score=35.77,GPHR_SALSA	High	69.011 0.0,ABA_GPCR|PF12430.8|7.7e+02,ABA_GPCR|PF12430.8|5.5e-39,GPHR_N|PF12537.8|6.8e-27,GPHR_N|PF12537.8|9.1e+03,NPCC|PF08058.11|9.1e+02,NPCC|PF08058.11|5.3e+02,NPCC|PF08058.11|0.28,NPCC|PF08058.11|4.2e+02 OFAVBQ_DN211277_c1_g2_i1:1962-3338(-)	0.309	0	2	1	1	1	1	458	53.3	9.38	0	1																Low	Not Found	Low	Low	Low	Low	Low	Low
OFAVBQ_DN209396_c0_g1_i7.p3			High	OFAVBQ_DN209396_c0_g1~~OFAVBQ_DN209396_c0_g1_i7.p3 ORF type:complete len:88 (+),score=6.32 OFAVBQ_DN209396_c0_g1_i7:3353-3616(+)	0.314	0	7	1	3	1	1	87	9.8	10.07	0	1																Low	Not Found	Low	Low	Low	Low	Low	Low
OFAVBQ_DN221400_c2_g2_i9.p1	type:complete	(-),score=94.44,ODO1_RAT	High	60.161 0.0,Transket_pyr|PF02779.24|6.9e-64,OxoGdeHyase_C|PF16870.5|1.7e+03,OxoGdeHyase_C|PF16870.5|2.9e-56,E1_dh|PF00676.20|1e-06 OFAVBQ_DN221400_c2_g2_i9:448-1935(-)	0.291	0	2	1	5	1	1	495	56.3	6.99	0	1																Low	Low	Low	Low	Low	Low	Low	Low
OFAVBQ_DN202684_c3_g2_i7.p4			High	OFAVBQ_DN202684_c3_g2~~OFAVBQ_DN202684_c3_g2_i7.p4 ORF type:complete len:72 (-),score=6.43 OFAVBQ_DN202684_c3_g2_i7:16-231(-)	0.296	0	14	1	1	1	1	71	8.3	10.14	0	1																Low	Low	Low	Low	Low	Low	Low	Low
OFAVBQ_DN225398_c6_g1_i5.p1	type:complete	(-),score=152.80,POL_FFV	High	24.900 1.86e-12,Peptidase_A17|PF05380.13|4.7e-36,Peptidase_A17|PF05380.13|1e+04,Peptidase_A17|PF05380.13|3.1e+03,DUF5641|PF18701.1|1.6e-19,rve|PF00665.26|7.1e-12,Integrase_H2C2|PF17921.1|8.1e-10,RVT_1|PF00078.27|0.00023,RVT_1|PF00078.27|1.9e+03,zf-H2C2|PF09337.10|0.0063,Seryl_tRNA_N|PF02403.22|6.4e+03,Seryl_tRNA_N|PF02403.22|0.27,Seryl_tRNA_N|PF02403.22|1.8e+04 OFAVBQ_DN225398_c6_g1_i5:42-2855(-)	0.297	0	2	2	5	2	1	937	108	8.9	0	2																Low	Low	Low	Low	Low	Low	Low	Low
OFAVBQ_DN207083_c4_g3_i2.p1	type:complete	(-),score=28.93,ERGI1_DANRE	High	65.403 1.57e-99,COPIIcoated_ERV|PF07970.12|5.9e-34,ERGIC_N|PF13850.6|0.02,ERGIC_N|PF13850.6|1.1e+03 OFAVBQ_DN207083_c4_g3_i2:455-1087(-)	0.196	0	4	1	3	1	1	210	23.6	7.05	0	1																Low	Low	Low	Low	Low	Low	Low	Low
OFAVBQ_DN214087_c2_g1_i3.p2			High	OFAVBQ_DN214087_c2_g1~~OFAVBQ_DN214087_c2_g1_i3.p2 ORF type:complete len:156 (+),score=2.23 OFAVBQ_DN214087_c2_g1_i3:2196-2663(+)	0.139	0	5	1	1	1	1	155	17.7	9.01	0	1																Low	Low	Low	Low	Low	Low	Low	Low
OFAVBQ_DN204473_c1_g1_i2.p1	type:5prime_partial	(-),score=92.48,LRR_4	High	PF12799.7 1.8e+03,LRR_4|PF12799.7|6.7e+02,LRR_4|PF12799.7|70,LRR_4|PF12799.7|1.2e+02,LRR_4|PF12799.7|1.8e+04,LRR_4|PF12799.7|4.4e+02,LRR_4|PF12799.7|1.8e+04,LRR_4|PF12799.7|7.7e+02,LRR_4|PF12799.7|16,LRR_4|PF12799.7|1.1,LRR_4|PF12799.7|0.014,Ribosomal_S4Pg|PF11993.8|2e+02,Ribosomal_S4Pg|PF11993.8|0.44,LRR_8|PF13855.6|1.7e+02,LRR_8|PF13855.6|57,LRR_8|PF13855.6|4.9e+02,LRR_8|PF13855.6|3.8e+03,LRR_8…	0.14	0	1	1	1	1	1	885	98.5	8.06	0	1	1.439	1.101	1.386	1.366	1.162	1.194	0.838	84.3	121.4	92.8	116.9	115.2	98	100.7	70.7	Low	Low	Low	Low	Low	Low	Low	Low
OFAVBQ_DN200033_c9_g1_i2.p2	type:complete	(+),score=25.10,Med9	High	PF07544.13 6.3e-05,DUF2046|PF09755.9|0.0013,CdvA|PF18822.1|3.2,CdvA|PF18822.1|0.028,THOC7|PF05615.13|0.0017,DUF1664|PF07889.12|0.0076,BicD|PF09730.9|0.0059,Trimer_CC|PF08954.11|23,Trimer_CC|PF08954.11|0.048,Fib_alpha|PF08702.10|0.012,Herpes_U30|PF04523.13|0.0084,Atg14|PF10186.9|0.0091,DUF745|PF05335.13|0.014,Fez1|PF06818.15|0.012,Fmp27_WPPW|PF10359.9|0.012,Translin|PF01997.16|0.017,HOOK|PF05622.1…	0.14	0	7	1	1	1	1	135	15.6	6.13	0	1																Low	Not Found	Low	Low	Low	Low	Low	Low
OFAVBQ_DN225189_c3_g2_i8.p1	type:complete	(-),score=43.02,PCSK5_BRACL	High	40.370 3.57e-51,P_proprotein|PF01483.20|1e-20,Peptidase_S8|PF00082.22|1e-09,Herpes_UL16|PF03044.14|0.013,DUF3482|PF11981.8|0.32,DUF3094|PF11293.8|2.2e+03,DUF3094|PF11293.8|1.4 OFAVBQ_DN225189_c3_g2_i8:1084-2283(-)	0.14	0	2	1	9	1	1	399	44.3	8.85	0	1																Low	Low	Low	Low	Low	Low	Low	Low
OFAVBQ_DN37226_c0_g1_i1.p1	type:internal	(-),score=19.67,RS201_ARATH	High	74.286 9.74e-35,Ribosomal_S10|PF00338.22|4.4e-19 OFAVBQ_DN37226_c0_g1_i1:2-247(-)	0.139	0	10	1	1	1	1	82	9.4	9.94	0	1																Low	Low	Low	Low	Low	Low	Low	Low
OFAVBQ_DN168621_c0_g2_i1.p1	type:5prime_partial	(-),score=48.81,DUF3450	High	PF11932.8 0.0028,YabA|PF06156.13|0.02,HALZ|PF02183.18|0.046,CSN5_C|PF18323.1|3.6e+03,CSN5_C|PF18323.1|0.036,TTKRSYEDQ|PF10212.9|0.03,KLRAQ|PF10205.9|0.036,NYD-SP28_assoc|PF14775.6|5.2e+03,NYD-SP28_assoc|PF14775.6|0.04,KASH_CCD|PF14662.6|0.049,Tropomyosin|PF00261.20|1.7,Tropomyosin|PF00261.20|0.18,Filament|PF00038.21|77,Filament|PF00038.21|0.14,Csm1_N|PF18504.1|5.3,Csm1_N|PF18504.1|4.6,UPF0449|PF1…	0.149	0	5	1	1	1	1	258	29.5	7.42	0	1	0.01	2.068	2.937	2.701	1.121	3.193	1.017	57		117.9	167.4	153.9	63.9	182	58	Low	Not Found	Low	Low	Low	Low	Low	Low
OFAVBQ_DN223586_c1_g2_i1.p1	type:complete	(-),score=206.93,TRPM3_HUMAN	High	41.693 0.0,LSDAT_euk|PF18139.1|2.6e-99,LSDAT_prok|PF18171.1|1.6e-22,Ion_trans|PF00520.31|4.8e+03,Ion_trans|PF00520.31|6.1e-18,TRPM_tetra|PF16519.5|3.1e-06,LDcluster4|PF18306.1|0.18,PKD_channel|PF08016.12|1.9e+02,PKD_channel|PF08016.12|1.3 OFAVBQ_DN223586_c1_g2_i1:1861-5691(-)	0.317	0	1	1	1	1	1	1276	144.8	6.92	0	1																Low	Not Found	Low	Low	Low	Not Found	Low	Low
OFAVBQ_DN155850_c0_g4_i1.p1	type:internal	(-),score=60.68,XhlA	High	PF10779.9 0.32,XkdW|PF09636.10|2.1e+02,XkdW|PF09636.10|0.057,Interfer-bind|PF09294.10|0.35,Interfer-bind|PF09294.10|7.6e+03,Interfer-bind|PF09294.10|1.9e+03,HlyD_2|PF12700.7|6.7e+02,HlyD_2|PF12700.7|0.62,Csm1_N|PF18504.1|5.1e+03,Csm1_N|PF18504.1|0.2,Csm1_N|PF18504.1|2.7e+03,Csm1_N|PF18504.1|34,Fib_alpha|PF08702.10|9.5,DUF1090|PF06476.12|7.9e+02,DUF1090|PF06476.12|2.1e+03,DUF1090|PF06476.12|2.1 OF…	0.149	0	3	2	3	2	1	279	31.9	5.6	0	2																Low	Low	Low	Low	Low	Low	Low	Low
OFAVBQ_DN205330_c1_g1_i1.p1	type:complete	(-),score=24.06,Retrotrans_gag	High	PF03732.17 0.15 OFAVBQ_DN205330_c1_g1_i1:64-492(-)	0.15	0	8	1	1	1	1	142	16.2	8.94	0	1																Not Found	Not Found	Low	Not Found	Not Found	Not Found	Not Found	Not Found
OFAVBQ_DN219873_c1_g1_i2.p3			High	OFAVBQ_DN219873_c1_g1~~OFAVBQ_DN219873_c1_g1_i2.p3 ORF type:5prime_partial len:78 (+),score=5.36 OFAVBQ_DN219873_c1_g1_i2:3-236(+)	0.123	0	17	1	1	1	1	77	8.9	9.44	0	1																Low	Not Found	Low	Low	Low	Not Found	Low	Low
OFAVBQ_DN196696_c0_g2_i2.p2	type:5prime_partial	(-),score=41.66,Mpp10	High	PF04006.12 0.011,DNA_pol_phi|PF04931.13|0.039,DUF4746|PF15928.5|0.045,Tim54|PF11711.8|0.048,SDA1|PF05285.12|0.04,DUF5542|PF17696.1|0.1,Nop14|PF04147.12|0.093,XAP5|PF04921.14|0.18,Porph_ging|PF09697.10|1.3,Roughex|PF06020.11|0.54,Roughex|PF06020.11|1.3e+03,TRAP_alpha|PF03896.16|1.4,PPP4R2|PF09184.11|2.5,VIR_N|PF15912.5|3.2,CDC45|PF02724.14|2.6,Astro_capsid_p|PF12226.8|5.3,DUF3438|PF11920.8|6.3,RRN…	0.123	0	3	1	1	1	1	235	27.4	4.79	0	1																Low	Low	Low	Low	Low	Low	Low	Low
OFAVBQ_DN219452_c0_g1_i3.p1	type:complete	(-),score=109.32,Peptidase_A17	High	PF05380.13 1.1e-46,RVT_1|PF00078.27|0.00041,DUF2526|PF10735.9|0.65,DUF2526|PF10735.9|1.4e+03,DND1_DSRM|PF14709.7|1.4e+04,DND1_DSRM|PF14709.7|0.43 OFAVBQ_DN219452_c0_g1_i3:1557-3440(-)	0.123	0	2	1	1	1	1	627	71	6.55	0	1																Low	Not Found	Low	Low	Low	Low	Low	Low
OFAVBQ_DN221683_c3_g1_i1.p1	type:5prime_partial	(-),score=8.75,sCache_like	High	PF16736.5 0.087 OFAVBQ_DN221683_c3_g1_i1:504-1037(-)	0.124	0	5	1	3	1	1	177	20	9.42	0	1																Low	Not Found	Low	Low	Low	Low	Low	Low
OFAVBQ_DN202914_c0_g2_i2.p2			High	OFAVBQ_DN202914_c0_g2~~OFAVBQ_DN202914_c0_g2_i2.p2 ORF type:complete len:80 (-),score=3.22 OFAVBQ_DN202914_c0_g2_i2:88-327(-)	0.124	0	10	1	2	1	1	79	9.1	9.36	0	1																Low	Not Found	Low	Low	Low	Low	Low	Low
OFAVBQ_DN224939_c2_g3_i1.p1	type:internal	(-),score=22.52,CRY2_CHICK	High	48.980 6.55e-13,CRY2_CHICK|46.000|1.34e-08,DNA_photolyase|PF00875.18|3.6e+03,DNA_photolyase|PF00875.18|1.8e-11,FAD_binding_7|PF03441.14|5.8e-09,FAD_binding_7|PF03441.14|5.8e+02 OFAVBQ_DN224939_c2_g3_i1:1-339(-)	0.124	0	8	1	3	1	1	113	13	8.68	0	1																Low	Low	Low	Low	Low	Low	Low	Low
OFAVBQ_DN224941_c7_g1_i1.p1	type:complete	(-),score=197.38,ALPK1_MOUSE	High	38.462 2.76e-45,ALPK1_MOUSE|31.298|2.26e-42,Alpha_kinase|PF02816.18|4.8e+03,Alpha_kinase|PF02816.18|2.1e-43,NB-ARC|PF00931.22|1.8e-05,NACHT|PF05729.12|0.00063,AAA_22|PF13401.6|0.00078,AAA_22|PF13401.6|7e+03,AAA_16|PF13191.6|0.0014,AAA_16|PF13191.6|1.4e+04,KAP_NTPase|PF07693.14|0.036,KAP_NTPase|PF07693.14|1.7e+03,NTPase_1|PF03266.15|0.042,NTPase_1|PF03266.15|3.5e+03,AAA_19|PF13245.6|0.15,U6-snRNA_…	0.125	0	1	1	3	1	1	1162	130.8	6.35	0	1	14.596	0.504	0.525	0.827	0.673	0.847	1.804	38.5	562	19.4	20.2	31.9	25.9	32.6	69.5	Low	Low	Low	Low	Low	Low	Low	Low
OFAVBQ_DN222575_c0_g1_i9.p1	type:complete	(-),score=219.38,C2CD5_MOUSE	High	46.860 0.0,C2|PF00168.30|9e-21,YbjQ_1|PF01906.17|2.5e+02,YbjQ_1|PF01906.17|0.36,YbjQ_1|PF01906.17|7.7e+03,YbjQ_1|PF01906.17|5e+02,Bac_small_YrzI|PF09501.10|1.1e+04,Bac_small_YrzI|PF09501.10|0.28,Bac_small_YrzI|PF09501.10|5.7e+03 OFAVBQ_DN222575_c0_g1_i9:1563-4838(-)	0.125	0	2	2	13	2	1	1091	119.6	5.48	0	2																Low	Not Found	Low	Low	Low	Low	Low	Low
OFAVBQ_DN212659_c4_g3_i2.p1	type:complete	(-),score=40.04,VIAF1_DROME	High	56.000 1.78e-81,Phosducin|PF02114.16|6e-20,dsDNA_bind|PF01984.20|4,dsDNA_bind|PF01984.20|19 OFAVBQ_DN212659_c4_g3_i2:1150-1764(-)	0.123	0	13	2	2	2	1	204	23.7	5.07	0	2																Low	Low	Low	Low	Low	Low	Low	Low
OFAVBQ_DN224805_c0_g1_i2.p1	type:complete	(-),score=364.48,OTOF_RAT	High	50.477 0.0,C2|PF00168.30|1.2e-06,C2|PF00168.30|0.16,C2|PF00168.30|6.8e-17,C2|PF00168.30|0.00075,FerB|PF08150.12|3.6e-30,FerB|PF08150.12|4.5e+03,Ferlin_C|PF16165.5|1.7e+02,Ferlin_C|PF16165.5|1.2,Ferlin_C|PF16165.5|3.5e-27,DUF2154|PF09922.9|32,DUF2154|PF09922.9|23 OFAVBQ_DN224805_c0_g1_i2:1387-5610(-)	0.128	0	1	1	1	1	1	1407	160.3	6.19	0	1																Low	Not Found	Low	Low	Low	Low	Low	Low
OFAVBQ_DN211133_c0_g1_i6.p1	type:complete	(-),score=69.95,ShK	High	PF01549.24 0.097,ShK|PF01549.24|2.8e-06,ShK|PF01549.24|0.00035,ShK|PF01549.24|7.2e-05,ShK|PF01549.24|1.1e-05,ShK|PF01549.24|1.7e-06,ShK|PF01549.24|1.3e-05,DUF1059|PF06348.11|3.1,DUF1059|PF06348.11|2.1e+02,DUF1059|PF06348.11|3.9e+03,DUF1059|PF06348.11|23 OFAVBQ_DN211133_c0_g1_i6:2746-4077(-)	0.132	0	2	1	1	1	1	443	48.7	6.06	0	1																Low	Not Found	Low	Low	Low	Low	Low	Low
OFAVBQ_DN157428_c0_g1_i1.p1	type:internal	(-),score=19.87,GAPR1_MOUSE	High	32.323 1.01e-07,CAP|PF00188.26|2.9e-09 OFAVBQ_DN157428_c0_g1_i1:1-546(-)	0.133	0	3	1	5	1	1	182	20.6	4.72	0	1																Low	Low	Low	Low	Low	Low	Low	Low
OFAVBQ_DN152165_c0_g1_i1.p1	type:3prime_partial	(-),score=62.85,PPN_HUMAN	High	31.655 8.90e-57,TSP_1|PF00090.19|1.9e-06,TSP_1|PF00090.19|1.4e-07,TSP_1|PF00090.19|1.1e-12,ADAM_spacer1|PF05986.14|8.8e-16,ADAM_spacer1|PF05986.14|8e+03 OFAVBQ_DN152165_c0_g1_i1:2-1798(-)	0.132	0	3	2	2	2	1	599	67.2	8.48	0	2																Low	Not Found	Low	Low	Low	Low	Low	Low
OFAVBQ_DN212996_c1_g1_i1.p1	type:complete	(-),score=228.24,PHLB1_RAT	High	32.923 3.07e-38,PHLB1_RAT|29.500|8.56e-06,PH|PF00169.29|3e+03,PH|PF00169.29|1.7e+03,PH|PF00169.29|5.8e-14,PH_11|PF15413.6|1.6e+03,PH_11|PF15413.6|2.5e+03,PH_11|PF15413.6|9.8e+03,PH_11|PF15413.6|3.1e-06,PH_8|PF15409.6|0.014 OFAVBQ_DN212996_c1_g1_i1:907-3321(-)	0.133	0	1	1	1	1	1	804	96.4	5.54	0	1	0.01	0.856	1.019	1.218	1.055	1.384	0.823	108.8		93.1	110.9	132.5	114.7	150.6	89.5	Low	Not Found	Low	Low	Low	Low	Low	Low
OFAVBQ_DN205584_c1_g1_i1.p1	type:5prime_partial	(-),score=83.02,IF4H_MOUSE	High	48.327 1.42e-58,RRM_1|PF00076.22|2.9e-12 OFAVBQ_DN205584_c1_g1_i1:799-1677(-)	0.134	0	4	2	2	2	1	292	30.7	9.63	0	2																Low	Not Found	Low	Low	Low	Low	Low	Low
OFAVBQ_DN217189_c5_g4_i4.p2	type:complete	(-),score=65.47,ECE_LOCMI	High	53.050 3.78e-147,Peptidase_M13|PF01431.21|2.9e+03,Peptidase_M13|PF01431.21|7.8e-71,Peptidase_M13_N|PF05649.13|7.2e-35,Peptidase_M13_N|PF05649.13|2.7e+03 OFAVBQ_DN217189_c5_g4_i4:509-1642(-)	0.134	0	2	1	1	1	1	377	43.1	8.53	0	1																Low	Not Found	Low	Low	Low	Low	Low	Low
OFAVBQ_DN183748_c0_g1_i1.p1	type:internal	(-),score=22.51,MLANA	High	PF14991.6 0.0012,DUF4366|PF14283.6|0.0016,RIFIN|PF02009.16|0.01,SKG6|PF08693.10|0.013,VSP|PF03302.13|0.021,Protocadherin|PF08374.11|0.027,Bacillus_PapR|PF05968.11|0.13,DUF2207|PF09972.9|0.071,Amnionless|PF14828.6|0.067,HemX|PF04375.14|0.11,EphA2_TM|PF14575.6|0.15,PARM|PF17061.5|0.14,FeoB_associated|PF12669.7|0.31,Adeno_E3_CR2|PF02439.15|14 OFAVBQ_DN183748_c0_g1_i1:2-256(-)	0.134	0	7	1	2	1	1	85	9.3	7.83	0	1																Low	Low	Low	Low	Low	Low	Low	Low
OFAVBQ_DN202188_c0_g1_i1.p1	type:complete	(-),score=35.09,DUF1573	High	PF07610.11 0.19 OFAVBQ_DN202188_c0_g1_i1:437-1426(-)	0.133	0	2	1	2	1	1	329	37.4	9.1	0	1																Low	Low	Low	Low	Low	Low	Low	Low
OFAVBQ_DN220970_c8_g1_i3.p1	type:complete	(-),score=93.18,RIOK3_HUMAN	High	60.827 0.0,RIO1|PF01163.22|6.4e+03,RIO1|PF01163.22|1e-70,Pkinase_fungal|PF17667.1|0.067,APH|PF01636.23|0.12,Choline_kinase|PF01633.20|2.9e+03,Choline_kinase|PF01633.20|0.18 OFAVBQ_DN220970_c8_g1_i3:602-1897(-)	0.132	0	2	1	2	1	1	431	49.8	7.66	0	1																Low	Not Found	Low	Low	Low	Low	Low	Low
OFAVBQ_DN221316_c1_g1_i5.p1	type:complete	(-),score=43.74,EXOG_MOUSE	High	42.254 4.12e-06,Endonuclease_NS|PF01223.23|4.6e-19,PLCC|PF14466.6|0.22,PLCC|PF14466.6|4e+03 OFAVBQ_DN221316_c1_g1_i5:965-1975(-)	0.123	0	2	1	2	1	1	336	37.1	9.28	0	1	3.317	19.437	2.862	2.534	1.293	1.758	0.754	24.3	80.5	471.9	69.5	61.5	31.4	42.7	18.3	Low	Low	Low	Low	Low	Low	Low	Low
OFAVBQ_DN146807_c0_g1_i2.p1	type:internal	(-),score=46.04,CATL1_MOUSE	High	49.749 1.07e-62,Peptidase_C1|PF00112.23|1e-38,Inhibitor_I29|PF08246.12|1.4e-11,Inhibitor_I29|PF08246.12|1.2e+03 OFAVBQ_DN146807_c0_g1_i2:1-591(-)	0.123	0	5	1	1	1	1	197	22.1	5.16	0	1	2.596	1.318	1.485	0.647	1.063	1.375	0.545	79.8	207	105.2	118.5	51.6	84.8	109.7	43.5	Low	Low	Low	Low	Low	Low	Low	Low
OFAVBQ_DN209913_c0_g1_i1.p1	type:complete	(-),score=49.91,BTBD6_MOUSE	High	38.435 5.03e-62,BTB|PF00651.31|6.9e-17,BTB|PF00651.31|9.7e+02,BACK|PF07707.15|1.7e-07,PHR|PF08005.12|2.4e-07 OFAVBQ_DN209913_c0_g1_i1:1438-2466(-)	0.125	0	3	1	1	1	1	342	39.1	6.07	0	1																Low	Not Found	Low	Low	Low	Low	Low	Low
OFAVBQ_DN204498_c2_g1_i3.p1	type:complete	(-),score=90.02,KCP_XENLA	High	27.219 2.82e-12,KCP_XENLA|24.759|1.71e-10,KCP_XENLA|25.282|8.16e-10,KCP_XENLA|24.556|2.83e-08,KCP_XENLA|23.529|1.37e-07,KCP_XENLA|25.424|1.70e-06,VWC|PF00093.18|9.9e-06,VWC|PF00093.18|0.00035,VWC|PF00093.18|0.015,VWC|PF00093.18|3.7e-05,VWC|PF00093.18|0.017,Rad50_zn_hook|PF04423.14|6,Rad50_zn_hook|PF04423.14|0.067,Rad50_zn_hook|PF04423.14|1.9e+02,Rad50_zn_hook|PF04423.14|1.2e+03 OFAVBQ_DN204498_c2…	0.149	0	1	1	1	1	1	509	57	6.81	0	1	1.098	0.886	1.199	1.074	1.112	1.394	0.922	92.1	101.1	81.6	110.5	98.9	102.5	128.4	84.9	Low	Low	Low	Low	Low	Low	Low	Low
OFAVBQ_DN199548_c0_g1_i1.p1	type:3prime_partial	(-),score=126.07,DYH5_RAT	High	44.475 0.0,DHC_N1|PF08385.12|1.1e-155,Imm3|PF14425.6|0.071 OFAVBQ_DN199548_c0_g1_i1:2-2374(-)	0.147	0	2	2	2	2	1	791	90.8	8.35	0	2																Low	Not Found	Low	Low	Low	Low	Low	Low
OFAVBQ_DN213223_c0_g1_i3.p4	type:complete	(+),score=-0.57,DUF365	High	PF04033.12 0.017 OFAVBQ_DN213223_c0_g1_i3:819-1031(+)	0.147	0	10	1	1	1	1	70	8.7	9.32	0	1																Low	Not Found	Low	Low	Low	Not Found	Low	Low
OFAVBQ_DN196047_c1_g1_i1.p1	type:5prime_partial	(-),score=50.74,Merozoite_SPAM	High	PF07133.11 0.16,DUF87|PF01935.17|0.24,DUF3523|PF12037.8|1.3 OFAVBQ_DN196047_c1_g1_i1:539-952(-)	0.143	0	9	2	2	2	1	137	16.2	5.58	0	2																Low	Low	Low	Low	Low	Low	Low	Low
OFAVBQ_DN212220_c5_g1_i11.p1	type:complete	(-),score=65.71,UPA	High	PF17217.3 1.1e-07 OFAVBQ_DN212220_c5_g1_i11:739-1911(-)	0.197	0	2	1	1	1	1	390	44.2	5.74	0	1																Low	Not Found	Low	Low	Low	Low	Low	Low
OFAVBQ_DN210652_c0_g1_i3.p1	type:5prime_partial	(-),score=95.73,DDRGK_TRIAD	High	65.152 4.20e-62,DDRGK|PF09756.9|2.8e+02,DDRGK|PF09756.9|1.1e-62,DUF4381|PF14316.6|0.0039,DUF4381|PF14316.6|4.6e+03,OSTbeta|PF15048.6|0.0043,CRPA|PF05745.11|0.16,LRR19-TM|PF15176.6|1.8,LRR19-TM|PF15176.6|1.1e+03,GRP|PF07172.11|0.24,PepSY_TM|PF03929.16|0.77,PepSY_TM|PF03929.16|1.1e+03,LapA_dom|PF06305.11|0.33,LapA_dom|PF06305.11|6.5e+03,Mss4|PF04421.13|2.3e+03,Mss4|PF04421.13|0.51,DUF4834|PF16118.5…	0.144	0	5	1	1	1	1	307	35.5	5.31	0	1																Low	Low	Low	Low	Low	Low	Low	Low
OFAVBQ_DN185574_c1_g1_i1.p1	type:5prime_partial	(-),score=98.71,IFT57	High	PF10498.9 27,IFT57|PF10498.9|0.12,IFT57|PF10498.9|0.22,Baculo_PEP_C|PF04513.12|3.6e+03,Baculo_PEP_C|PF04513.12|4.4e+03,Baculo_PEP_C|PF04513.12|6e+03,Baculo_PEP_C|PF04513.12|10,Baculo_PEP_C|PF04513.12|1.4,LOH1CR12|PF10158.9|1.7,LOH1CR12|PF10158.9|48,LOH1CR12|PF10158.9|3.3e+02,PRA-PH|PF01503.17|35,PRA-PH|PF01503.17|59,Spc7|PF08317.11|1.3e+02,Spc7|PF08317.11|2.2,Spc7|PF08317.11|4.2 OFAVBQ_DN185574_c…	0.146	0	2	1	2	1	1	449	51.9	5.22	0	1																Low	Not Found	Low	Low	Low	Low	Low	Low
OFAVBQ_DN214716_c1_g3_i2.p2	type:complete	(-),score=119.64,CE112_HUMAN	High	43.648 6.16e-106,CE112_HUMAN|30.409|8.07e-06,DUF4485|PF14846.6|7.8e-28,DUF4485|PF14846.6|3.1e+03,DUF4485|PF14846.6|3.8e+03,DUF4485|PF14846.6|4.8e+03,ParD_antitoxin|PF03693.14|0.047,Nup54|PF13874.6|1.2e+04,Nup54|PF13874.6|0.014,ZapB|PF06005.12|1.3e+04,ZapB|PF06005.12|1.8e+04,ZapB|PF06005.12|0.019,Uma2|PF05685.12|0.061,Uma2|PF05685.12|1.8e+03,Uma2|PF05685.12|3.4e+03,FAM184|PF15665.5|1.6e+02,FAM184|…	0.146	0	5	2	5	2	1	487	56.1	6.7	0	2																Low	Low	Low	Low	Low	Low	Low	Low
OFAVBQ_DN214702_c6_g1_i12.p1	type:complete	(-),score=167.40,RHG26_HUMAN	High	49.914 0.0,BAR_3|PF16746.5|5.8e-83,RhoGAP|PF00620.27|8.1e+02,RhoGAP|PF00620.27|8.8e+02,RhoGAP|PF00620.27|1.8e-41,PH|PF00169.29|3.9e+03,PH|PF00169.29|7.2e-07,BAR|PF03114.18|1.3e-06,PH_17|PF18012.1|0.097,PH_17|PF18012.1|1.8e+03,DUF4924|PF16271.5|0.19,DUF4924|PF16271.5|3.5e+02,BPS1|PF05633.11|0.17,CSF-1|PF05337.11|2.7e+03,CSF-1|PF05337.11|1.1,CSF-1|PF05337.11|2.5e+03 OFAVBQ_DN214702_c6_g1_i12:1573-3…	0.126	0	1	1	2	1	1	770	87.6	7.05	0	1	0.01	1.418	1.115	1.432	1.604	1.311	1.978	81.2		115.1	90.5	116.2	130.2	106.4	160.5	Low	Not Found	Low	Low	Low	Low	Low	Low
OFAVBQ_DN203888_c4_g1_i7.p2			High	OFAVBQ_DN203888_c4_g1~~OFAVBQ_DN203888_c4_g1_i7.p2 ORF type:complete len:72 (-),score=5.21 OFAVBQ_DN203888_c4_g1_i7:187-402(-)	0.126	0	13	1	2	1	1	71	8	10.29	0	1																Low	Not Found	Low	Low	Low	Low	Low	Low
OFAVBQ_DN210810_c4_g2_i4.p1	type:complete	(-),score=23.70,BTBD6_XENTR	High	35.025 1.82e-21,PHR|PF08005.12|7e-30,Laminin_G_3|PF13385.6|0.016,Methyltransf_1N|PF02870.15|0.29 OFAVBQ_DN210810_c4_g2_i4:266-889(-)	0.126	0	3	1	4	1	1	207	23	5.83	0	1	0.01	0.812	0.808	0.96	0.702	0.718	0.569	143.7		116.6	116	137.9	100.8	103.1	81.8	Low	Low	Low	Low	Low	Low	Low	Low
OFAVBQ_DN204922_c1_g1_i8.p1	type:complete	(-),score=3.58,POLG_PVCV2	High	22.388 2.24e-07,RVT_1|PF00078.27|4.5e-10 OFAVBQ_DN204922_c1_g1_i8:2229-3431(-)	0.126	0	2	1	1	1	1	400	45.1	8.82	0	1																Low	Not Found	Low	Low	Low	Low	Low	Low
OFAVBQ_DN217273_c3_g1_i4.p6			High	OFAVBQ_DN217273_c3_g1~~OFAVBQ_DN217273_c3_g1_i4.p6 ORF type:complete len:76 (+),score=1.84 OFAVBQ_DN217273_c3_g1_i4:42-269(+)	0.125	0	13	1	1	1	1	75	8.7	10.54	0	1																Low	Not Found	Low	Low	Low	Low	Low	Low
OFAVBQ_DN224117_c0_g1_i10.p1	type:complete	(-),score=37.86,DPOL_HPBDW	High	24.444 7.95e-11,RVT_1|PF00078.27|5.4e-16,RNA_replicase_B|PF03431.13|0.18,RNA_replicase_B|PF03431.13|1.2e+03 OFAVBQ_DN224117_c0_g1_i10:1861-3135(-)	0.127	0	2	1	1	1	1	424	47.1	7.99	0	1																Low	Low	Low	Low	Low	Low	Low	Low
OFAVBQ_DN111026_c0_g1_i1.p1			High	OFAVBQ_DN111026_c0_g1~~OFAVBQ_DN111026_c0_g1_i1.p1 ORF type:3prime_partial len:78 (-),score=3.13 OFAVBQ_DN111026_c0_g1_i1:2-232(-)	0.127	0	12	1	6	1	1	77	9.1	8.95	0	1																Low	Low	Low	Low	Low	Low	Low	Low
OFAVBQ_DN203384_c5_g1_i5.p1	type:complete	(-),score=45.52,LRC69_XENLA	High	48.193 3.17e-68,LRR_8|PF13855.6|8.8e-08,LRR_8|PF13855.6|8.3e-10,LRR_8|PF13855.6|2.4e-06,LRR_8|PF13855.6|6.3e-08,LRR_8|PF13855.6|3.4e-07,LRR_8|PF13855.6|9.9e-10,LRR_8|PF13855.6|2.1e-05,LRR_8|PF13855.6|9e+02,LRR_4|PF12799.7|8e-08,LRR_4|PF12799.7|2.8e-05,LRR_4|PF12799.7|3.2e-06,LRR_4|PF12799.7|2.1e-05,LRR_4|PF12799.7|16,LRR_1|PF00560.33|6.2,LRR_1|PF00560.33|6.2,LRR_1|PF00560.33|3.1e+02,LRR_1|PF00560…	0.127	0	7	1	4	1	1	255	28.7	7.56	0	1																Low	Low	Low	Low	Low	Low	Low	Low
OFAVBQ_DN202145_c1_g1_i1.p1	type:internal	(+),score=-4.69,DUF4803	High	PF16061.5 0.072 OFAVBQ_DN202145_c1_g1_i1:2-241(+)	0.128	0	8	1	1	1	1	80	8.9	10.04	0	1																Low	Low	Low	Low	Low	Low	Low	Low
OFAVBQ_DN220055_c0_g1_i1.p1	type:complete	(-),score=322.32,SMC2_XENLA	High	63.508 0.0,SMC_N|PF02463.19|3.2e-47,SMC_hinge|PF06470.13|4.8e-20,AAA_21|PF13304.6|0.00026,AAA_21|PF13304.6|5.2e+03,AAA_21|PF13304.6|0.00078,AAA_15|PF13175.6|6.5e-09,AAA_15|PF13175.6|1e+04,AAA_15|PF13175.6|1.3e+03,AAA_23|PF13476.6|1.7e-08,AAA_13|PF13166.6|2e+02,AAA_13|PF13166.6|2.9e+03,AAA_13|PF13166.6|2.4e+02,AAA_13|PF13166.6|30,AAA_13|PF13166.6|0.00037,AAA_29|PF13555.6|0.0011,BRE1|PF08647.11|3.9…	0.125	0	2	3	9	3	1	1216	136.5	8.57	0	3	0.831	0.31	2.561	0.534	0.367	0.642	0.296	122.3	101.7	37.9	313.3	65.3	44.9	78.5	36.2	Low	Low	Low	Low	Low	Low	Low	Low
OFAVBQ_DN216776_c1_g1_i2.p1	type:complete	(-),score=208.34,NOS1_MOUSE	High	50.665 0.0,NO_synthase|PF02898.15|1.7e-178,FAD_binding_1|PF00667.20|1.1e-63,Flavodoxin_1|PF00258.25|1.9e-43,NAD_binding_1|PF00175.21|4.8e-18,TrfA|PF07042.11|0.012 OFAVBQ_DN216776_c1_g1_i2:1288-4824(-)	0.125	0	2	1	1	1	1	1178	132.6	8.03	0	1																Low	Low	Low	Low	Low	Low	Low	Low
OFAVBQ_DN199882_c5_g1_i2.p1	type:complete	(-),score=42.25,BMPH_STRPU	High	46.679 9.35e-168,Astacin|PF01400.24|1.1e-67,CUB|PF00431.20|1.2e-26,CUB|PF00431.20|1.8e-35,Reprolysin_4|PF13583.6|0.00039,Peptidase_M10|PF00413.24|56,Peptidase_M10|PF00413.24|0.23,CUB_2|PF02408.20|0.038,Peptidase_M66|PF10462.9|0.14,Reprolysin_3|PF13582.6|0.21 OFAVBQ_DN199882_c5_g1_i2:3009-4484(-)	0.15	0	3	2	4	2	1	491	55.6	8.82	0	2																Low	Low	Low	Low	Low	Low	Low	Low
OFAVBQ_DN145103_c0_g2_i1.p1	type:5prime_partial	(-),score=65.73,ANT3_MOUSE	High	37.548 7.09e-46,Serpin|PF00079.20|2.3e-78,DUF3164|PF11363.8|0.026,DUF3739|PF12545.8|0.22 OFAVBQ_DN145103_c0_g2_i1:236-1156(-)	0.079	0	2	1	1	1	1	306	33.4	4.4	0	1																Low	Low	Low	Low	Low	Low	Low	Low
OFAVBQ_DN207235_c2_g2_i1.p2			High	OFAVBQ_DN207235_c2_g2~~OFAVBQ_DN207235_c2_g2_i1.p2 ORF type:complete len:212 (+),score=26.39 OFAVBQ_DN207235_c2_g2_i1:63-698(+)	0.087	0	4	1	1	1	1	211	24.5	9.25	0	1	0.01	1.089	1.392	1.831	0.939	1.152	0.811	97.4		106.1	135.6	178.4	91.5	112.2	79	Low	Not Found	Low	Low	Low	Low	Low	Low
OFAVBQ_DN171380_c0_g2_i1.p1	type:internal	(-),score=27.20,FA98C_HUMAN	High	27.950 3.38e-09,DUF2465|PF10239.9|4.6e-21 OFAVBQ_DN171380_c0_g2_i1:1-813(-)	0.079	0	7	2	2	2	1	271	29.3	5.74	0	2																Low	Low	Low	Low	Low	Low	Low	Low
OFAVBQ_DN223947_c1_g1_i4.p1	type:complete	(-),score=239.65,IF172_DANRE	High	73.212 0.0,IF172_DANRE|23.975|5.63e-08,IF172_DANRE|25.359|1.22e-07,IF172_DANRE|22.383|9.25e-06,ANAPC4_WD40|PF12894.7|2,ANAPC4_WD40|PF12894.7|12,ANAPC4_WD40|PF12894.7|0.6,ANAPC4_WD40|PF12894.7|1.3,ANAPC4_WD40|PF12894.7|75,WD40|PF00400.32|4.5,WD40|PF00400.32|6.1,WD40|PF00400.32|49,WD40|PF00400.32|2.8e+02,WD40|PF00400.32|5.2e+03,WD40|PF00400.32|7e+02,WD40|PF00400.32|2.1e+02,Clathrin|PF00637.20|2.9,C…	0.091	0	1	1	2	1	1	992	111.4	6.18	0	1																Low	Low	Low	Low	Low	Low	Low	Low
OFAVBQ_DN220847_c4_g2_i8.p1	type:complete	(-),score=106.47,SOS1_HUMAN	High	52.140 1.32e-168,RhoGEF|PF00621.20|6.6e+03,RhoGEF|PF00621.20|1.7e-21,RhoGEF|PF00621.20|4.8e+03,Histone|PF00125.24|5.3e+03,Histone|PF00125.24|3.8e-08,Histone|PF00125.24|6e+03,PH|PF00169.29|0.029 OFAVBQ_DN220847_c4_g2_i8:3753-5351(-)	0.092	0	3	2	2	2	1	532	60.5	6.18	0	2																Low	Not Found	Low	Low	Low	Low	Low	Low
OFAVBQ_DN224619_c1_g1_i1.p5	type:5prime_partial	(+),score=4.97,HIRAN	High	PF08797.11 0.043 OFAVBQ_DN224619_c1_g1_i1:3-251(+)	0.092	0	12	1	1	1	1	82	9.5	9.99	0	1																Low	Low	Low	Low	Low	Low	Low	Low
OFAVBQ_DN217586_c2_g1_i1.p1			High	OFAVBQ_DN217586_c2_g1~~OFAVBQ_DN217586_c2_g1_i1.p1 ORF type:internal len:119 (-),score=23.90 OFAVBQ_DN217586_c2_g1_i1:3-356(-)	0.092	0	5	1	1	1	1	118	13.8	4.79	0	1																Low	Low	Low	Low	Low	Low	Low	Low
OFAVBQ_DN203771_c3_g1_i5.p1	type:complete	(-),score=48.83,TMPS6_MOUSE	High	36.330 2.52e-42,Trypsin|PF00089.26|6e+03,Trypsin|PF00089.26|9.1e-50,Sushi|PF00084.20|2.2e-10,Sushi|PF00084.20|1.4e+03,EGF_3|PF12947.7|4.6e+03,EGF_3|PF12947.7|6.4e-09,EGF_CA|PF07645.15|9.3e+03,EGF_CA|PF07645.15|3.6e+02,EGF_CA|PF07645.15|2.6e-07,cEGF|PF12662.7|0.014,cEGF|PF12662.7|0.16,EGF_MSP1_1|PF12946.7|3.1e+02,EGF_MSP1_1|PF12946.7|0.00083,EGF|PF00008.27|9.6e+03,EGF|PF00008.27|0.00016,hEGF|PF126…	0.092	0	2	1	1	1	1	441	49.8	9.66	0	1																Low	Not Found	Low	Low	Low	Low	Low	Low
OFAVBQ_DN168703_c0_g2_i1.p1	type:internal	(-),score=14.34,FBRL_DROME	High	89.899 8.05e-60,Fibrillarin|PF01269.17|7.9e-52,GCD14|PF08704.10|0.0049,PCMT|PF01135.19|0.015,Methyltr_RsmB-F|PF01189.17|0.018 OFAVBQ_DN168703_c0_g2_i1:1-297(-)	0.092	0	11	1	2	1	1	99	10.7	9.47	0	1																Low	Low	Low	Low	Low	Low	Low	Low
OFAVBQ_DN218221_c0_g1_i11.p1	type:complete	(-),score=42.13,RHG32_XENLA	High	41.667 4.44e-57,RhoGAP|PF00620.27|1.9e-34 OFAVBQ_DN218221_c0_g1_i11:1117-2709(-)	0.092	0	4	3	3	3	1	530	59.8	9.92	0	3																Low	Low	Low	Low	Low	Low	Low	Low
OFAVBQ_DN221527_c5_g3_i1.p4			High	OFAVBQ_DN221527_c5_g3~~OFAVBQ_DN221527_c5_g3_i1.p4 ORF type:complete len:133 (+),score=17.57 OFAVBQ_DN221527_c5_g3_i1:949-1347(+)	0.092	0	5	1	1	1	1	132	15.1	7.65	0	1																Low	Not Found	Low	Low	Low	Low	Low	Low
OFAVBQ_DN207518_c0_g1_i1.p2			High	OFAVBQ_DN207518_c0_g1~~OFAVBQ_DN207518_c0_g1_i1.p2 ORF type:5prime_partial len:82 (-),score=5.75 OFAVBQ_DN207518_c0_g1_i1:2258-2503(-)	0.093	0	9	1	3	1	1	81	9.6	8.21	0	1	1.275	1.001	1.01	1.339	0.828	1.336	0.901	92.1	117.4	92.1	92.9	123.2	76.2	123	83	Low	Low	Low	Low	Low	Low	Low	Low
OFAVBQ_DN207940_c1_g2_i2.p1	type:complete	(-),score=42.20,NCAM2_MOUSE	High	30.252 6.70e-07,Ig_3|PF13927.6|3.8e+02,Ig_3|PF13927.6|4.4e-12,Ig_2|PF13895.6|2e+03,Ig_2|PF13895.6|2.1e-11,I-set|PF07679.16|1.2e+04,I-set|PF07679.16|4.9e-11,ig|PF00047.25|1.1e+04,ig|PF00047.25|2e-09,V-set|PF07686.17|0.096,V-set|PF07686.17|1.8,Ig_5|PF16681.5|0.0011,C1-set|PF07654.15|0.0033,C2-set_2|PF08205.12|0.16 OFAVBQ_DN207940_c1_g2_i2:327-1412(-)	0.092	0	2	1	1	1	1	361	40.9	9.54	0	1																Low	Low	Low	Low	Low	Low	Low	Low
OFAVBQ_DN215154_c0_g2_i2.p1	type:complete	(-),score=101.65,TB10A_HUMAN	High	41.718 8.85e-36,RabGAP-TBC|PF00566.18|3.7e-49 OFAVBQ_DN215154_c0_g2_i2:720-2636(-)	0.102	0	1	1	2	1	1	638	72.6	9.51	0	1																Low	Low	Low	Low	Low	Low	Low	Low
OFAVBQ_DN210783_c0_g1_i3.p1	type:complete	(-),score=88.17,CADN_ACRMI	High	28.615 5.58e-33,CADN_ACRMI|38.095|2.63e-31,CADN_ACRMI|41.379|4.25e-25,CADN_ACRMI|40.870|7.44e-24,CADN_ACRMI|40.351|2.81e-18,VWA|PF00092.28|1.1e+04,VWA|PF00092.28|7.9e-28,TSP_1|PF00090.19|1e-08,TSP_1|PF00090.19|2.8e-10,VWA_2|PF13519.6|4.1e-08 OFAVBQ_DN210783_c0_g1_i3:302-1738(-)	0.107	0	2	2	7	2	1	478	52.4	8.06	0	2																Low	Low	Low	Low	Low	Low	Low	Low
OFAVBQ_DN212960_c1_g2_i2.p1	type:complete	(-),score=108.37,KPC1B_CAEEL	High	59.835 0.0,Pkinase|PF00069.25|6.9e-68,Pkinase_Tyr|PF07714.17|2.2e-34,C1_1|PF00130.22|2.3e-14,C1_1|PF00130.22|1e-17,C2|PF00168.30|5e-15,Pkinase_C|PF00433.24|3.5e-08,Kinase-like|PF14531.6|8.1e-05,Haspin_kinase|PF12330.8|0.00075,Kdo|PF06293.14|0.0025,FTA2|PF13095.6|0.79,FTA2|PF13095.6|17,RIO1|PF01163.22|0.046,APH|PF01636.23|2.6e+03,APH|PF01636.23|0.14,FYVE_2|PF02318.16|5.7,FYVE_2|PF02318.16|0.98,C1_…	0.114	0	2	1	1	1	1	716	81.2	7.5	0	1																Low	Not Found	Low	Low	Low	Not Found	Low	Low
OFAVBQ_DN222477_c1_g2_i17.p1	type:complete	(-),score=716.62,DYH7_HUMAN	High	57.131 0.0,AAA_6|PF12774.7|3.7e-157,AAA_6|PF12774.7|1.3e+03,AAA_6|PF12774.7|1.2e+02,DHC_N2|PF08393.13|1.8e+03,DHC_N2|PF08393.13|3e-146,DHC_N2|PF08393.13|1.2e+03,DHC_N2|PF08393.13|5.3e+02,DHC_N2|PF08393.13|5.2e+02,AAA_8|PF12780.7|2.8e-105,AAA_9|PF12781.7|1.1e+02,AAA_9|PF12781.7|7.4e-94,AAA_9|PF12781.7|8.8e+02,AAA_7|PF12775.7|47,AAA_7|PF12775.7|3.4e+03,AAA_7|PF12775.7|2.7e+03,AAA_7|PF12775.7|8.3e-8…	0.115	0	1	3	3	3	1	3520	400.7	5.43	0	3																Low	Low	Low	Low	Low	Low	Low	Low
OFAVBQ_DN223805_c2_g1_i2.p1	type:complete	(-),score=194.36,VPS54_MOUSE	High	44.883 0.0,Vps54|PF07928.12|7.7e+03,Vps54|PF07928.12|1.8e+04,Vps54|PF07928.12|3.5e-47,Vps54|PF07928.12|1.1e+04,Vps54_N|PF10475.9|3e-08,Vps54_N|PF10475.9|4.4e+03,Pox_F11|PF04943.12|1.2e+03,Pox_F11|PF04943.12|0.11,Nup54|PF13874.6|3.4e+03,Nup54|PF13874.6|0.62 OFAVBQ_DN223805_c2_g1_i2:1390-4389(-)	0.115	0	1	1	2	1	1	999	112.7	7.06	0	1																Low	Low	Low	Low	Low	Low	Low	Low
OFAVBQ_DN211595_c3_g4_i1.p1	type:3prime_partial	(+),score=-0.63,SecG	High	PF03840.14 0.03,POTRA_1|PF08478.10|0.22 OFAVBQ_DN211595_c3_g4_i1:108-326(+)	0.115	0	30	1	1	1	1	73	8.4	5.1	0	1	1.274	1.313	0.855	1.149	1.312	1.091	1.482	84.4	107.5	110.9	72.2	97	110.7	92.1	125.1	Low	Low	Low	Low	Low	Low	Low	Low
OFAVBQ_DN213950_c1_g1_i5.p1	type:complete	(-),score=57.73,HSP16_CAEEL	High	44.086 2.54e-13,HSP20|PF00011.21|1.7e-09,HSP20|PF00011.21|2.2e-17,ArsA_HSP20|PF17886.1|0.06,ArsA_HSP20|PF17886.1|2.3e-06,YabP|PF07873.11|1.1e+02,YabP|PF07873.11|0.41,Imm31|PF15591.6|0.19 OFAVBQ_DN213950_c1_g1_i5:698-1447(-)	0.115	0	3	1	1	1	1	249	28.4	5.36	0	1																Low	Not Found	Low	Low	Low	Low	Low	Low
OFAVBQ_DN156078_c0_g3_i1.p1			High	OFAVBQ_DN156078_c0_g3~~OFAVBQ_DN156078_c0_g3_i1.p1 ORF type:internal len:81 (+),score=8.23 OFAVBQ_DN156078_c0_g3_i1:2-241(+)	0.116	0	45	2	2	2	1	80	8.8	7.97	0	2	0.937	0.649	0.746	0.964	0.4	0.57	0.291	144	135	93.4	107.4	138.8	57.5	82.1	41.9	Low	Low	Low	Low	Low	Low	Low	Low
OFAVBQ_DN225495_c0_g2_i1.p1	type:3prime_partial	(-),score=363.35,AGRIN_CHICK	High	30.394 1.69e-64,AGRIN_CHICK|30.058|6.83e-64,AGRIN_CHICK|29.951|3.55e-48,AGRIN_CHICK|30.471|7.96e-46,AGRIN_CHICK|31.434|2.82e-42,AGRIN_CHICK|26.806|9.67e-39,AGRIN_CHICK|30.233|1.85e-22,AGRIN_CHICK|43.243|9.65e-06,Kazal_2|PF07648.15|2e-07,Kazal_2|PF07648.15|5.5e-08,Kazal_2|PF07648.15|2.1e-08,Kazal_2|PF07648.15|5e-05,Kazal_2|PF07648.15|1e-07,Kazal_2|PF07648.15|2e-08,Kazal_2|PF07648.15|9.5e-11,Kazal_…	0.093	0	3	4	6	4	1	1840	198.5	7.34	0	4	0.51	1.113	1.163	1.232	1.261	1.142	2.512	80.5	41.1	89.7	93.6	99.2	101.6	92	202.3	Low	Low	Low	Low	Low	Low	Low	Low
OFAVBQ_DN210140_c1_g1_i2.p1	type:complete	(-),score=188.65,NECB_HYDVU	High	59.649 1.04e-112,P_proprotein|PF01483.20|5.7e-26,P_proprotein|PF01483.20|1.6e+03,Peptidase_S8|PF00082.22|6.8e-18 OFAVBQ_DN210140_c1_g1_i2:776-3292(-)	0.116	0	2	2	2	2	1	838	93.4	7.84	0	2																Low	Low	Low	Low	Low	Low	Low	Low
OFAVBQ_DN222918_c2_g1_i8.p1	type:complete	(-),score=435.70,TMF_DNA_bd	High	PF12329.8 8.3e+02,TMF_DNA_bd|PF12329.8|3.5e+03,TMF_DNA_bd|PF12329.8|1.4e+02,TMF_DNA_bd|PF12329.8|1.7e+03,TMF_DNA_bd|PF12329.8|5.2,TMF_DNA_bd|PF12329.8|3.5e+02,TMF_DNA_bd|PF12329.8|1.3e+03,TMF_DNA_bd|PF12329.8|1e+04,TMF_DNA_bd|PF12329.8|97,TMF_DNA_bd|PF12329.8|17,TMF_DNA_bd|PF12329.8|2.8e+03,TMF_DNA_bd|PF12329.8|9.6,TMF_DNA_bd|PF12329.8|2.7e+02,TMF_DNA_bd|PF12329.8|1.3e+04,TMF_DNA_bd|PF12329.8|1.4…	0.091	0	1	3	4	3	1	1826	210.2	4.93	0	3																Low	Low	Low	Low	Low	Low	Low	Low
OFAVBQ_DN204211_c4_g1_i2.p1	type:complete	(-),score=148.89,MCF2L_RAT	High	33.433 1.81e-104,RhoGEF|PF00621.20|4.5e-41,SH3_1|PF00018.28|1.1e-10,SH3_9|PF14604.6|1.3e-09,SH3_2|PF07653.17|2.9e-05,PH_10|PF15411.6|2.9e+03,PH_10|PF15411.6|0.0037,PH|PF00169.29|0.038,IQ_SEC7_PH|PF16453.5|3.5e+03,IQ_SEC7_PH|PF16453.5|0.088,RepB|PF07506.11|0.15,Vac_Fusion|PF02346.16|1e+03,Vac_Fusion|PF02346.16|1.7e+03,Vac_Fusion|PF02346.16|1.9,Euplotes_phero|PF05842.11|5.6e+03,Euplotes_phero|PF058…	0.094	0	2	1	3	1	1	624	70.7	6.43	0	1																Low	Not Found	Low	Low	Low	Low	Low	Low
OFAVBQ_DN219098_c2_g4_i3.p1	type:complete	(-),score=61.23,Cor1	High	PF04803.12 0.0059,Cor1|PF04803.12|4.6e+03,DUF1664|PF07889.12|0.17,DUF1664|PF07889.12|1.5e+03,Fib_alpha|PF08702.10|2e+03,Fib_alpha|PF08702.10|5.8,DUF1043|PF06295.12|64 OFAVBQ_DN219098_c2_g4_i3:446-1276(-)	0.088	0	3	1	2	1	1	276	32.4	8.32	0	1																Low	Not Found	Low	Low	Low	Low	Low	Low
OFAVBQ_DN224845_c1_g1_i2.p3	type:3prime_partial	(-),score=58.89,DUF1759	High	PF03564.15 2.8e+03,DUF1759|PF03564.15|7.3e-37,zf-CCHC|PF00098.23|0.033,zf-CCHC|PF00098.23|73 OFAVBQ_DN224845_c1_g1_i2:2-1273(-)	0.089	0	4	2	3	2	1	424	47.7	8.4	0	2																Low	Low	Low	Low	Low	Low	Low	Low
OFAVBQ_DN215377_c1_g1_i6.p1	type:complete	(-),score=90.44,TRPC5_HUMAN	High	30.722 2.24e-85,Ion_trans|PF00520.31|4e-15,Ank_2|PF12796.7|1.3,Ank_2|PF12796.7|6.5e-08,TRP_2|PF08344.11|2.5e-05,Ank_3|PF13606.6|31,Ank_3|PF13606.6|2.3e+03,Ank_3|PF13606.6|0.047,Ank_3|PF13606.6|1.6e+04,Ank_3|PF13606.6|9.7e+03,PKD_channel|PF08016.12|0.0032,Ank|PF00023.30|85,Ank|PF00023.30|0.34,Ank_5|PF13857.6|1.7,Ank_5|PF13857.6|1.1e+02,2TM|PF13239.6|0.021,2TM|PF13239.6|1.8e+04,2TM|PF13239.6|1.3e+0…	0.089	0	2	1	1	1	1	664	75.5	6.87	0	1																Low	Not Found	Low	Low	Low	Low	Low	Low
OFAVBQ_DN220230_c0_g1_i6.p1	type:complete	(-),score=101.26,KCNH7_RAT	High	43.238 1.05e-127,Ion_trans|PF00520.31|3.6e-29,Ion_trans_2|PF07885.16|7.4e+03,Ion_trans_2|PF07885.16|5.5e+03,Ion_trans_2|PF07885.16|6.7e-11,cNMP_binding|PF00027.29|0.026,7tm_3|PF00003.22|5.7e+03,7tm_3|PF00003.22|0.027,eIF3_N|PF09440.10|0.28,CLZ|PF16526.5|0.39 OFAVBQ_DN220230_c0_g1_i6:1232-3475(-)	0.089	0	1	1	3	1	1	747	85.9	6.89	0	1																Low	Low	Low	Low	Low	Low	Low	Low
OFAVBQ_DN198639_c1_g1_i6.p1	type:5prime_partial	(-),score=22.54,Amino_oxidase	High	PF01593.24 5.8e-07,HI0933_like|PF03486.14|7.8e-05,DAO|PF01266.24|0.00034,Pyr_redox_3|PF13738.6|0.011,Pyr_redox|PF00070.27|0.1,Pyr_redox|PF00070.27|2.4e+03 OFAVBQ_DN198639_c1_g1_i6:373-855(-)	0.089	0	8	1	1	1	1	160	18.3	9.58	0	1																Low	Not Found	Low	Low	Low	Low	Low	Low
OFAVBQ_DN219792_c0_g1_i2.p1	type:complete	(-),score=616.80,PCDL_ACRMI	High	32.791 0.0,PCDL_ACRMI|31.579|1.90e-09,Cadherin|PF00028.17|1.1e+03,Cadherin|PF00028.17|5.8e-16,Cadherin|PF00028.17|6.4e-17,Cadherin|PF00028.17|5.8e-10,Cadherin|PF00028.17|6.1e-14,Cadherin|PF00028.17|2.2e-13,Cadherin|PF00028.17|5.4e-19,Cadherin|PF00028.17|8.2e-07,Cadherin|PF00028.17|4.7e-14,Cadherin|PF00028.17|7.3e-12,Cadherin|PF00028.17|6.8e-09,Cadherin|PF00028.17|9e-06,Cadherin|PF00028.17|1.2e-14…	0.089	0	1	3	3	3	1	4479	494.2	5.43	0	3																Low	Low	Low	Low	Low	Low	Low	Low
OFAVBQ_DN152362_c0_g1_i1.p1	type:5prime_partial	(-),score=38.20,GPSM1_HUMAN	High	35.057 1.05e-23,GPSM1_HUMAN|31.188|1.23e-17,GPSM1_HUMAN|31.746|2.40e-16,TPR_12|PF13424.6|0.00026,TPR_12|PF13424.6|0.0001,TPR_12|PF13424.6|1.7e-05,TPR_12|PF13424.6|1.1e-13,TPR_1|PF00515.28|0.0067,TPR_1|PF00515.28|0.0037,TPR_1|PF00515.28|0.00052,TPR_2|PF07719.17|4.4e+03,TPR_2|PF07719.17|0.0095,TPR_2|PF07719.17|0.0058,TPR_2|PF07719.17|0.014,TPR_10|PF13374.6|0.038,TPR_10|PF13374.6|0.58,TPR_10|PF13374…	0.089	0	4	1	1	1	1	191	21	5.49	0	1																Low	Low	Low	Low	Low	Low	Low	Low
OFAVBQ_DN223633_c5_g1_i6.p1	type:5prime_partial	(-),score=11.30,KLHL8_HUMAN	High	41.429 1.21e-06,Kelch_1|PF01344.25|19,Kelch_1|PF01344.25|1.1e-06,Kelch_6|PF13964.6|64,Kelch_6|PF13964.6|1.9e-06,Kelch_4|PF13418.6|1.5e+03,Kelch_4|PF13418.6|5.5e-06,Kelch_3|PF13415.6|3.2,Kelch_3|PF13415.6|0.12,Kelch_2|PF07646.15|1.6e+03,Kelch_2|PF07646.15|0.016 OFAVBQ_DN223633_c5_g1_i6:467-709(-)	0.093	0	8	1	1	1	1	80	9.1	5.33	0	1																Low	Not Found	Low	Low	Low	Low	Low	Low
OFAVBQ_DN224750_c1_g2_i2.p1	type:complete	(-),score=133.60,TRIM3_HUMAN	High	24.363 3.10e-47,TRIM3_HUMAN|30.827|5.65e-08,HEPN_DZIP3|PF18738.1|1.2e-54,Filamin|PF00630.19|2.1e-14,Filamin|PF00630.19|1.7e+04,NHL|PF01436.21|4.3,NHL|PF01436.21|5.6e+02,NHL|PF01436.21|2.8e+02,NHL|PF01436.21|0.31,NHL|PF01436.21|1.4,zf-B_box|PF00643.24|8.7e-07,DUF5128|PF17170.4|1.6e+03,DUF5128|PF17170.4|2.9e+02,DUF5128|PF17170.4|32,DUF5128|PF17170.4|0.055,Bacillus_HBL|PF05791.11|2.2e+03,Bacillus_HB…	0.093	0	2	2	2	2	1	818	91.7	6.51	0	2	2.056	1.107	1.118	3.859	1.74	1.148	1.029	61.3	126	67.8	68.5	236.4	106.6	70.3	63	Low	Low	Low	Low	Low	Low	Low	Low
OFAVBQ_DN204863_c3_g2_i9.p1	type:complete	(+),score=17.15,OTU	High	PF02338.19 1.4e+03,OTU|PF02338.19|0.079 OFAVBQ_DN204863_c3_g2_i9:273-635(+)	0.093	0	15	2	8	2	1	120	13.7	6.68	0	2																Low	Low	Low	Low	Low	Low	Low	Low
OFAVBQ_DN197550_c0_g3_i2.p1			High	OFAVBQ_DN197550_c0_g3~~OFAVBQ_DN197550_c0_g3_i2.p1 ORF type:complete len:135 (-),score=11.94 OFAVBQ_DN197550_c0_g3_i2:369-773(-)	0.093	0	5	1	2	1	1	134	14.5	5.41	0	1																Low	Low	Low	Low	Low	Low	Low	Low
OFAVBQ_DN215472_c1_g2_i3.p1	type:complete	(-),score=93.39,CALU_MOUSE	High	30.400 3.69e-24,EF-hand_7|PF13499.6|0.0001,EF-hand_7|PF13499.6|0.0056,EF-hand_7|PF13499.6|6e-08,EF-hand_7|PF13499.6|2.1e-06,EF-hand_1|PF00036.32|0.00022,EF-hand_1|PF00036.32|0.003,EF-hand_1|PF00036.32|0.04,EF-hand_1|PF00036.32|0.17,EF-hand_1|PF00036.32|0.0014,EF-hand_1|PF00036.32|0.42,EF-hand_5|PF13202.6|6.6e-05,EF-hand_5|PF13202.6|0.00021,EF-hand_5|PF13202.6|2e+02,EF-hand_5|PF13202.6|0.13,EF-han…	0.093	0	3	1	2	1	1	354	40.4	5.2	0	1																Low	Low	Low	Low	Low	Low	Low	Low
OFAVBQ_DN217062_c1_g2_i3.p1	type:complete	(-),score=216.01,TAOK1_RAT	High	49.186 0.0,Pkinase|PF00069.25|2.2e-63,Pkinase|PF00069.25|7e+02,Pkinase|PF00069.25|2.7e+03,Pkinase|PF00069.25|9.5e+02,Pkinase_Tyr|PF07714.17|6.3e-44,APH|PF01636.23|0.011,APH|PF01636.23|1.1e+04,APH|PF01636.23|4.8e+03 OFAVBQ_DN217062_c1_g2_i3:1925-4636(-)	0.094	0	1	1	1	1	1	903	104.4	7.72	0	1																Low	Low	Low	Low	Low	Low	Low	Low
OFAVBQ_DN219595_c1_g1_i8.p3	type:complete	(-),score=25.28,CEP78_XENTR	High	47.847 7.05e-64,LRR_6|PF13516.6|1.7e+04,LRR_6|PF13516.6|0.00015,LRR_6|PF13516.6|3.3,LRR_1|PF00560.33|5.6e+03,LRR_1|PF00560.33|11,LRR_1|PF00560.33|3.3e+02 OFAVBQ_DN219595_c1_g1_i8:2488-3120(-)	0.094	0	7	2	2	2	1	210	23.6	8.73	0	2																Low	Low	Low	Low	Low	Low	Low	Low
OFAVBQ_DN219490_c0_g1_i1.p1	type:complete	(-),score=178.35,MRP4_HUMAN	High	37.462 0.0,ABC_tran|PF00005.27|6.6e-22,ABC_tran|PF00005.27|4.6e-27,ABC_membrane|PF00664.23|1.7e-19,ABC_membrane|PF00664.23|6.9e-27,SMC_N|PF02463.19|0.17,SMC_N|PF02463.19|30,SMC_N|PF02463.19|3.5e-05,AAA_23|PF13476.6|0.00058,AAA_23|PF13476.6|0.13,AAA_16|PF13191.6|0.0037,AAA_16|PF13191.6|0.33,AAA_29|PF13555.6|0.17,AAA_29|PF13555.6|0.0079,T2SSE|PF00437.20|0.0013,T2SSE|PF00437.20|2.6,RsgA_GTPase|PF031…	0.094	0	1	2	3	2	1	1299	146.4	8.53	0	2	1.012	1.154	0.809	0.646	0.631	1.158	0.909	109.3	110.6	126.2	88.4	70.6	69	126.6	99.4	Low	Low	Low	Low	Low	Low	Low	Low
OFAVBQ_DN222294_c1_g1_i1.p1	type:complete	(-),score=200.98,GLI3_CHICK	High	43.253 1.54e-94,zf-C2H2|PF00096.26|1.8,zf-C2H2|PF00096.26|0.0013,zf-C2H2|PF00096.26|0.003,zf-C2H2|PF00096.26|0.0063,zf-C2H2|PF00096.26|0.00025,zf-H2C2_2|PF13465.6|7.3e+02,zf-H2C2_2|PF13465.6|3.6e-05,zf-H2C2_2|PF13465.6|1.7e-06,zf-H2C2_2|PF13465.6|1.6,zf-H2C2_2|PF13465.6|4.2e+02,FOXP-CC|PF16159.5|0.0022,FOXP-CC|PF16159.5|2.1e+02,FOXP-CC|PF16159.5|1.1e+02,FOXP-CC|PF16159.5|0.44,zf-C2H2_4|PF13894.6|…	0.094	0	1	1	1	1	1	1170	129.6	7.33	0	1																Low	Not Found	Low	Low	Low	Low	Low	Low
OFAVBQ_DN222303_c1_g1_i8.p1	type:complete	(-),score=38.02,ECE1_RAT	High	41.432 5.44e-108,Peptidase_M13|PF01431.21|2.4e+02,Peptidase_M13|PF01431.21|3.1e-70,Peptidase_M13_N|PF05649.13|2.3e-31,DUF3543|PF12063.8|0.033,Peptidase_M48|PF01435.18|0.69,Peptidase_M48|PF01435.18|4.3e+02,ComA|PF02679.15|0.16 OFAVBQ_DN222303_c1_g1_i8:703-1890(-)	0.094	0	2	1	3	1	1	395	45.3	6.99	0	1																Low	Low	Low	Low	Low	Low	Low	Low
OFAVBQ_DN219667_c0_g1_i3.p1	type:complete	(-),score=323.00,SF3B1_XENLA	High	78.999 0.0,SF3b1|PF08920.10|1.2e+03,SF3b1|PF08920.10|0.67,SF3b1|PF08920.10|3.2e-45,HEAT_2|PF13646.6|4.9e+03,HEAT_2|PF13646.6|6.4,HEAT_2|PF13646.6|1.5e+02,HEAT_2|PF13646.6|19,HEAT_2|PF13646.6|1.8e+02,HEAT_2|PF13646.6|4.7,HEAT_2|PF13646.6|0.023,HEAT_2|PF13646.6|74,HEAT|PF02985.22|3.4e+03,HEAT|PF02985.22|3.4e+03,HEAT|PF02985.22|0.69,HEAT|PF02985.22|2.4e+03,HEAT|PF02985.22|0.83,HEAT|PF02985.22|53,HEA…	0.094	0	1	1	1	1	1	1317	147.5	6.81	0	1																Low	Low	Low	Low	Low	Low	Low	Low
OFAVBQ_DN219761_c0_g2_i4.p1	type:complete	(-),score=315.22,M18BP_HUMAN	High	31.408 9.24e-27,M18BP_HUMAN|28.986|4.88e-09,SANTA|PF09133.10|5.8e-23,Myb_DNA-binding|PF00249.31|8.5e+03,Myb_DNA-binding|PF00249.31|5.1e-06,Myb_DNA-bind_6|PF13921.6|9.2e+03,Myb_DNA-bind_6|PF13921.6|0.11 OFAVBQ_DN219761_c0_g2_i4:120-3923(-)	0.093	0	2	4	5	4	1	1267	140.9	8.92	0	4																Low	Low	Low	Low	Low	Low	Low	Low
OFAVBQ_DN195473_c0_g1_i2.p1	type:complete	(-),score=10.59,SIFAR_DROME	High	29.305 7.89e-34,7tm_1|PF00001.21|8.8e-52,7TM_GPCR_Srsx|PF10320.9|2.2e-17,7TM_GPCR_Srw|PF10324.9|1.1e-05,Gaa1|PF04114.14|4.4e+02,Gaa1|PF04114.14|0.0056,Orf78|PF06024.12|59,Orf78|PF06024.12|8,Orf78|PF06024.12|1.7e+02 OFAVBQ_DN195473_c0_g1_i2:1047-2156(-)	0.116	0	3	1	1	1	1	369	42.1	9.94	0	1																Not Found	Not Found	Not Found	Low	Not Found	Not Found	Not Found	Low
OFAVBQ_DN217215_c4_g3_i10.p1	type:complete	(-),score=172.01,BAIP3_HUMAN	High	31.801 6.43e-109,C2|PF00168.30|3.9e-13,DUF4883|PF16224.5|4.6e+03,DUF4883|PF16224.5|1.1e+04,DUF4883|PF16224.5|5.8,DUF4883|PF16224.5|2.6e+02 OFAVBQ_DN217215_c4_g3_i10:1771-4401(-)	0.116	0	1	1	1	1	1	876	100.7	5.99	0	1																Low	Low	Low	Low	Low	Low	Low	Low
OFAVBQ_DN209575_c7_g1_i1.p1			High	OFAVBQ_DN209575_c7_g1~~OFAVBQ_DN209575_c7_g1_i1.p1 ORF type:complete len:96 (-),score=2.39 OFAVBQ_DN209575_c7_g1_i1:143-430(-)	0.114	0	9	1	1	1	1	95	11	9.54	0	1																Low	Not Found	Low	Low	Low	Low	Low	Low
OFAVBQ_DN213427_c0_g2_i6.p2	type:complete	(-),score=59.90,FA45A_DANRE	High	47.112 4.48e-117,SPA|PF08616.10|8.7e-11,Avl9|PF09794.9|0.019,Avl9|PF09794.9|0.0041,DUF2347|PF09804.9|5.3e-05,Imm3|PF14425.6|6.8e+03,Imm3|PF14425.6|0.096 OFAVBQ_DN213427_c0_g2_i6:5422-6414(-)	0.117	0	5	1	1	1	1	330	37.5	6.43	0	1																Low	Not Found	Low	Low	Low	Not Found	Not Found	Low
OFAVBQ_DN223414_c1_g1_i10.p1			High	OFAVBQ_DN223414_c1_g1~~OFAVBQ_DN223414_c1_g1_i10.p1 ORF type:complete len:341 (-),score=49.01 OFAVBQ_DN223414_c1_g1_i10:2116-3138(-)	0.117	0	2	1	1	1	1	340	38.1	6.71	0	1																Low	Low	Low	Low	Low	Low	Not Found	Low
OFAVBQ_DN294894_c0_g1_i1.p1	type:internal	(-),score=16.37,ADA11_MOUSE	High	42.188 2.12e-11,Pep_M12B_propep|PF01562.19|4e-18 OFAVBQ_DN294894_c0_g1_i1:1-219(-)	0.118	0	16	1	1	1	1	73	8.2	8.47	0	1																Low	Not Found	Low	Low	Low	Low	Low	Low
OFAVBQ_DN219947_c0_g1_i2.p2	type:complete	(-),score=23.76,P4HA2_MOUSE	High	31.963 5.24e-31,P4Ha_N|PF08336.11|4.9e-32,TPR_2|PF07719.17|6.9e+03,TPR_2|PF07719.17|0.79 OFAVBQ_DN219947_c0_g1_i2:2753-3529(-)	0.118	0	6	1	3	1	1	258	29.6	5.54	0	1	0.01	0.967	1.444	1.373	2.023	1.48	1.948	78.2		75.6	112.9	107.3	158.1	115.7	152.3	Low	Not Found	Low	Low	Low	Low	Low	Low
OFAVBQ_DN171686_c0_g1_i1.p1	type:5prime_partial	(-),score=44.47,FXI1E_XENLA	High	52.174 3.75e-23,Forkhead|PF00250.18|2.6e-28,Tom22|PF04281.13|1.8 OFAVBQ_DN171686_c0_g1_i1:481-1599(-)	0.118	0	3	1	1	1	1	372	42.3	8.92	0	1																Low	Not Found	Low	Low	Low	Low	Low	Low
OFAVBQ_DN186831_c0_g2_i2.p1	type:5prime_partial	(-),score=-3.11,DOPR1_DROME	High	38.571 4.26e-09,7tm_1|PF00001.21|1.1e-06,Sensor_TM1|PF13755.6|0.091,7TM_GPCR_Srt|PF10321.9|0.082 OFAVBQ_DN186831_c0_g2_i2:321-599(-)	0.119	0	9	1	3	1	1	92	10.5	9.85	0	1																Low	Low	Low	Low	Low	Low	Low	Low
OFAVBQ_DN215963_c0_g1_i4.p2	type:complete	(-),score=81.13,MSH2_MOUSE	High	62.069 6.15e-131,MutS_II|PF05188.17|1.2e-20,MutS_I|PF01624.20|4.1e-18 OFAVBQ_DN215963_c0_g1_i4:2868-3866(-)	0.119	0	2	1	1	1	1	332	36.6	6.4	0	1																Low	Not Found	Low	Low	Low	Low	Low	Low
OFAVBQ_DN169892_c0_g2_i1.p1	type:internal	(-),score=8.19,PTEN_XENLA	High	38.710 3.41e-13 OFAVBQ_DN169892_c0_g2_i1:3-398(-)	0.119	0	8	1	1	1	1	132	14.9	11.27	0	1																Low	Low	Low	Low	Low	Low	Low	Low
OFAVBQ_DN185991_c0_g1_i1.p1	type:5prime_partial	(-),score=15.26,YDJ1_CAEEL	High	36.885 6.09e-14,Ndr|PF03096.14|1.6e-14 OFAVBQ_DN185991_c0_g1_i1:217-591(-)	0.117	0	6	1	1	1	1	124	13.7	8.18	0	1																Low	Low	Low	Low	Low	Low	Low	Low
OFAVBQ_DN208113_c1_g4_i1.p1	type:complete	(-),score=23.61,Asp_protease_2	High	PF13650.6 1.5e-07,gag-asp_proteas|PF13975.6|3.6e-05,zf-HC5HC2H_2|PF13832.6|0.041,DUF1758|PF05585.12|0.057,Hen1_L|PF12623.7|0.24,zf-CCHC_4|PF14392.6|3.3e+02,zf-CCHC_4|PF14392.6|0.46,zf-HC5HC2H|PF13771.6|38,zf-HC5HC2H|PF13771.6|6.7 OFAVBQ_DN208113_c1_g4_i1:833-1537(-)	0.114	0	11	2	2	2	1	234	26.5	9.88	0	2																Low	Low	Low	Low	Low	Low	Low	Low
OFAVBQ_DN199789_c0_g1_i7.p1	type:complete	(-),score=95.03,ALS_MOUSE	High	33.165 3.65e-37,ALS_MOUSE|29.024|4.79e-27,ALS_MOUSE|30.544|7.99e-20,ALS_MOUSE|34.591|1.92e-10,ALS_MOUSE|29.439|7.98e-10,ALS_MOUSE|30.994|2.14e-09,LRR_8|PF13855.6|7.5e-12,LRR_8|PF13855.6|9.3e-12,LRR_8|PF13855.6|2e-06,LRR_8|PF13855.6|3.5e-10,LRR_8|PF13855.6|8.2e-13,LRR_8|PF13855.6|2.9e-13,LRR_8|PF13855.6|2.2e-06,LRR_4|PF12799.7|1.8e+02,LRR_4|PF12799.7|0.019,LRR_4|PF12799.7|1.2e-06,LRR_4|PF12799.7|4…	0.111	0	1	1	1	1	1	1218	137.7	7.71	0	1																Low	Not Found	Low	Low	Low	Low	Low	Low
OFAVBQ_DN214602_c1_g1_i2.p1	type:complete	(+),score=28.52,IL15	High	PF02372.15 0.0053 OFAVBQ_DN214602_c1_g1_i2:1359-2441(+)	0.111	0	2	1	1	1	1	360	41	8.4	0	1																Low	Not Found	Low	Low	Low	Low	Low	Low
OFAVBQ_DN190286_c0_g1_i1.p1	type:5prime_partial	(-),score=5.68,RYAR_DROME	High	26.613 2.46e-10,7tm_1|PF00001.21|3.5e-14,7TM_GPCR_Srw|PF10324.9|6e-06,7TM_GPCR_Srsx|PF10320.9|1.2e-05,DUF4064|PF13273.6|0.005,7TM_GPCR_Srv|PF10323.9|0.005,DUF5362|PF17319.2|0.05,DUF5362|PF17319.2|5.8e+03,Tail_VII|PF17091.5|6.7e+02,Tail_VII|PF17091.5|0.82,DUF2759|PF10958.8|55,DUF2759|PF10958.8|4.8 OFAVBQ_DN190286_c0_g1_i1:825-1241(-)	0.105	0	5	1	7	1	1	138	15.7	9.48	0	1																Low	Low	Low	Low	Low	Low	Low	Low
OFAVBQ_DN141037_c0_g2_i1.p1	type:internal	(-),score=11.97,TCPD_PONAB	High	76.923 8.40e-33,Cpn60_TCP1|PF00118.24|1.3e-25 OFAVBQ_DN141037_c0_g2_i1:1-237(-)	0.105	0	8	1	1	1	1	79	8.4	5.39	0	1																Low	Not Found	Low	Low	Low	Low	Low	Low
OFAVBQ_DN205950_c1_g1_i5.p1	type:complete	(-),score=41.94,SY63_DIPOM	High	28.933 1.75e-41,C2|PF00168.30|2.7e-13,C2|PF00168.30|0.0017,CEP76-C2|PF15627.6|0.0026,PI3K_C2|PF00792.24|8.5e+03,PI3K_C2|PF00792.24|0.047,S1FA|PF04689.13|0.19 OFAVBQ_DN205950_c1_g1_i5:307-1692(-)	0.105	0	2	1	1	1	1	461	51.9	9.26	0	1																Low	Not Found	Low	Low	Low	Not Found	Low	Low
OFAVBQ_DN269614_c0_g1_i1.p2	type:3prime_partial	(-),score=13.54,PH4H_CAEEL	High	54.348 3.65e-06,ACT|PF01842.25|1.6e-05,ADPRTs_Tse2|PF18648.1|0.19 OFAVBQ_DN269614_c0_g1_i1:1-213(-)	0.106	0	10	1	2	1	1	71	7.8	9.09	0	1																Low	Low	Low	Low	Low	Low	Low	Low
OFAVBQ_DN224716_c4_g1_i7.p2	type:complete	(-),score=89.31,PH	High	PF00169.29 2e+02,PH|PF00169.29|0.0004,Sec3-PIP2_bind|PF15277.6|4.8e+03,Sec3-PIP2_bind|PF15277.6|0.15,Sec3-PIP2_bind|PF15277.6|4.8e+03,DUF2179|PF10035.9|0.31 OFAVBQ_DN224716_c4_g1_i7:5261-6379(-)	0.106	0	3	2	2	2	1	372	42.3	6.48	0	2	0.01	1.156	2.167	1.25	3.276	1.704	2.808	59.9		69.2	129.7	74.8	196.1	102	168.1	Low	Not Found	Low	Low	Low	Low	Low	Low
OFAVBQ_DN223763_c5_g1_i9.p1	type:complete	(-),score=177.71,FNBP4_HUMAN	High	50.000 2.01e-21,FNBP4_HUMAN|28.500|6.27e-07,WW|PF00397.26|7.9e-08,WW|PF00397.26|34 OFAVBQ_DN223763_c5_g1_i9:1854-3419(-)	0.106	0	4	2	6	2	1	521	58.5	4.37	0	2	0.951	1.228	0.842	0.533	0.336	0.878	0.751	122.7	116.7	150.7	103.4	65.5	41.2	107.7	92.1	Low	Low	Low	Low	Low	Low	Low	Low
OFAVBQ_DN200325_c3_g1_i1.p1	type:internal	(-),score=7.30,Sulfotransfer_4	High	PF17784.1 2.1e-09 OFAVBQ_DN200325_c3_g1_i1:3-227(-)	0.112	0	19	2	2	2	1	75	8.8	10.49	0	2	0.01	1.337	0.893	1.036	1.435	1.326	5.382	64.5		86.2	57.6	66.8	92.5	85.5	347	Low	Low	Low	Low	Low	Low	Low	Low
OFAVBQ_DN211975_c0_g2_i1.p1	type:3prime_partial	(-),score=56.16,FBP3_STRPU	High	60.000 1.17e-52,FBP3_STRPU|56.291|3.00e-51,FBP3_STRPU|53.691|8.25e-46,FBP3_STRPU|51.678|2.28e-43,FBP3_STRPU|63.478|1.60e-41,FBP3_STRPU|25.294|2.81e-06,EGF|PF00008.27|5.3e+03,EGF|PF00008.27|9.3e-09,EGF|PF00008.27|5e-09,EGF|PF00008.27|2.4e-09,EGF|PF00008.27|2.5e-07,hEGF|PF12661.7|0.0022,hEGF|PF12661.7|8.6e-07,hEGF|PF12661.7|2.5e-06,hEGF|PF12661.7|3.5e-08,SRCR|PF00530.18|1.4e+03,SRCR|PF00530.18|7.4e…	0.117	0	1	1	1	1	1	496	53.4	5.54	0	1																Low	Not Found	Low	Low	Low	Low	Low	Low
OFAVBQ_DN218806_c1_g3_i2.p1	type:complete	(-),score=363.63,KI16B_HUMAN	High	54.803 0.0,Kinesin|PF00225.23|4.8e-112,Kinesin|PF00225.23|1.8e+04,Kinesin|PF00225.23|1.2e+04,Microtub_bd|PF16796.5|1.4e-23,Microtub_bd|PF16796.5|1.8e+04,Microtub_bd|PF16796.5|5.3e+03,Kinesin_assoc|PF16183.5|2.2e-06,Kinesin_assoc|PF16183.5|0.00012,Kinesin_assoc|PF16183.5|1.8e+04,Kinesin_assoc|PF16183.5|1.8e+04,Kinesin_assoc|PF16183.5|1.8e+04,Kinesin_assoc|PF16183.5|2.5e+03,Yop-YscD_cpl|PF16697.5|0…	0.119	0	2	3	7	3	1	1276	147.6	5.59	0	3																Low	Low	Low	Low	Low	Low	Low	Low
OFAVBQ_DN204561_c2_g4_i2.p4			High	OFAVBQ_DN204561_c2_g4~~OFAVBQ_DN204561_c2_g4_i2.p4 ORF type:complete len:92 (+),score=6.96 OFAVBQ_DN204561_c2_g4_i2:45-320(+)	0.122	0	8	1	1	1	1	91	10.3	11.03	0	1																Low	Low	Low	Low	Low	Low	Low	Low
OFAVBQ_DN200725_c1_g1_i1.p1	type:complete	(-),score=42.39,WN10A_MOUSE	High	43.081 7.13e-108,wnt|PF00110.19|2.6e-111 OFAVBQ_DN200725_c1_g1_i1:1277-2362(-)	0.114	0	2	1	1	1	1	361	40.2	8.41	0	1																Low	Low	Low	Low	Low	Low	Low	Low
OFAVBQ_DN221374_c1_g1_i3.p2			High	OFAVBQ_DN221374_c1_g1~~OFAVBQ_DN221374_c1_g1_i3.p2 ORF type:complete len:128 (-),score=3.61 OFAVBQ_DN221374_c1_g1_i3:377-760(-)	0.112	0	20	1	1	1	1	127	14.3	9.79	0	1																Low	Not Found	Not Found	Low	Low	Low	Not Found	Not Found
OFAVBQ_DN199465_c1_g1_i1.p1	type:complete	(-),score=54.30,HOP2_RAT	High	48.148 1.35e-68,TBPIP|PF07106.13|9.7e-22,LZ3wCH|PF18517.1|2.6e+03,LZ3wCH|PF18517.1|5.2e+02,LZ3wCH|PF18517.1|9.9e-15,SesA|PF17107.5|4.4e-05,Penicillinase_R|PF03965.16|0.00029,Snapin_Pallidin|PF14712.6|0.002,Rootletin|PF15035.6|0.0015,HhH-GPD|PF00730.25|1.8,HhH-GPD|PF00730.25|3.7,Laminin_II|PF06009.12|0.0069,DUF5595|PF18077.1|0.0084,DUF5595|PF18077.1|3.1e+03,Exonuc_VII_L|PF02601.15|0.015,TrmB|PF019…	0.112	0	5	1	1	1	1	212	24.6	9.16	0	1																Low	Low	Low	Low	Low	Low	Low	Low
OFAVBQ_DN220236_c2_g2_i9.p1	type:complete	(-),score=217.67,UBP16_MACFA	High	42.460 3.28e-47,UBP16_MACFA|35.336|5.69e-42,UCH|PF00443.29|3.7e-44,DUF3385|PF11865.8|0.47,zinc_ribbon_9|PF14369.6|9.5,zinc_ribbon_9|PF14369.6|62,zinc_ribbon_9|PF14369.6|1.2e+04 OFAVBQ_DN220236_c2_g2_i9:1258-4314(-)	0.112	0	1	1	1	1	1	1018	111.9	5.3	0	1																Low	Not Found	Low	Low	Low	Low	Low	Low
OFAVBQ_DN278084_c0_g1_i1.p1	type:internal	(-),score=5.86,7tm_1	High	PF00001.21 2.8e-08,7TM_GPCR_Srx|PF10328.9|0.002,7tm_4|PF13853.6|0.0028 OFAVBQ_DN278084_c0_g1_i1:3-209(-)	0.112	0	38	1	3	1	1	69	7.7	9.47	0	1																Low	Not Found	Low	Low	Low	Low	Low	Low
OFAVBQ_DN216255_c0_g1_i1.p1	type:complete	(-),score=45.90,FGF20_HUMAN	High	40.426 4.95e-18,FGF|PF00167.18|2.9e-26,FGF|PF00167.18|6.7e+03 OFAVBQ_DN216255_c0_g1_i1:1009-1944(-)	0.112	0	3	1	1	1	1	311	35.2	5.14	0	1																Low	Not Found	Low	Low	Low	Low	Low	Low
OFAVBQ_DN186401_c0_g1_i1.p1	type:internal	(-),score=32.23,Pentaxin	High	PF00354.17 0.037 OFAVBQ_DN186401_c0_g1_i1:2-508(-)	0.113	0	6	1	2	1	1	169	18.7	9.23	0	1																Low	Not Found	Low	Low	Low	Low	Low	Low
OFAVBQ_DN218742_c2_g1_i6.p1	type:complete	(-),score=109.83,TMCO3_MOUSE	High	44.833 1.53e-179,Na_H_Exchanger|PF00999.21|9.7e-64,Fib_alpha|PF08702.10|0.0071,Caskin-tail|PF16632.5|0.45,DUF507|PF04368.13|0.73,Dymeclin|PF09742.9|11,Dymeclin|PF09742.9|3,Cadherin_C_2|PF16492.5|1.1,Cadherin_C_2|PF16492.5|7e+03 OFAVBQ_DN218742_c2_g1_i6:1407-3500(-)	0.113	0	1	1	1	1	1	697	76.9	7.31	0	1																Not Found	Not Found	Low	Low	Not Found	Not Found	Low	Low
OFAVBQ_DN215746_c4_g1_i5.p1	type:complete	(-),score=56.70,ERP29_MOUSE	High	44.737 1.46e-57,ERp29_N|PF07912.13|3.6e-43,ERp29|PF07749.12|4.8e+03,ERp29|PF07749.12|1.7e-23,Thioredoxin|PF00085.20|0.0098,Condensin2nSMC|PF12422.8|0.093 OFAVBQ_DN215746_c4_g1_i5:705-1535(-)	0.113	0	3	1	1	1	1	276	31.2	6.23	0	1																Low	Low	Low	Low	Low	Low	Low	Low
OFAVBQ_DN203553_c2_g2_i2.p1	type:3prime_partial	(+),score=6.82,DUF4227	High	PF14004.6 0.0094 OFAVBQ_DN203553_c2_g2_i2:168-500(+)	0.117	0	5	1	1	1	1	111	13	9.86	0	1																Low	Not Found	Low	Low	Low	Low	Low	Low
OFAVBQ_DN222478_c0_g1_i3.p1	type:complete	(-),score=103.34,PLSI_MOUSE	High	40.530 7.52e-52,PLSI_MOUSE|24.510|2.42e-06,CH|PF00307.31|1.1e-16,CH|PF00307.31|1.6e-19,CH|PF00307.31|4.5e+03,CAMSAP_CH|PF11971.8|0.27,CAMSAP_CH|PF11971.8|1.2e+02,DUF4407|PF14362.6|0.25,SHE3|PF17078.5|1.2e+03,SHE3|PF17078.5|0.22,ERM|PF00769.19|72,ERM|PF00769.19|1.4,BRE1|PF08647.11|5.1,BRE1|PF08647.11|3.5e+03,BRE1|PF08647.11|2.7,Fzo_mitofusin|PF04799.13|0.18,Fzo_mitofusin|PF04799.13|2.2e+02 OFAVBQ_…	0.117	0	1	1	6	1	1	618	71.6	7.91	0	1	0.32	1.25	1.159	1.262	1.245	1.424	1.886	83.8	26.8	104.8	97.1	105.7	104.3	119.4	158.1	Low	Low	Low	Low	Low	Low	Low	Low
OFAVBQ_DN219756_c0_g1_i16.p1	type:complete	(-),score=24.89,TBCC1_HUMAN	High	44.253 1.74e-34 OFAVBQ_DN219756_c0_g1_i16:2217-2954(-)	0.12	0	4	1	1	1	1	245	27.7	6.65	0	1																Low	Low	Low	Low	Low	Low	Low	Low
OFAVBQ_DN173466_c0_g1_i1.p1			High	OFAVBQ_DN173466_c0_g1~~OFAVBQ_DN173466_c0_g1_i1.p1 ORF type:5prime_partial len:197 (-),score=39.30 OFAVBQ_DN173466_c0_g1_i1:1-591(-)	0.12	0	5	1	2	1	1	196	22.7	4.84	0	1																Low	Not Found	Low	Low	Low	Low	Low	Low
OFAVBQ_DN228704_c0_g1_i1.p2	type:internal	(-),score=17.87,ERF3B_MOUSE	High	45.556 7.26e-21,GTP_EFTU_D3|PF03143.17|1.1e-21 OFAVBQ_DN228704_c0_g1_i1:2-277(-)	0.121	0	12	1	1	1	1	92	10.3	8.29	0	1																Low	Low	Low	Low	Low	Low	Low	Low
OFAVBQ_DN202044_c1_g3_i2.p1	type:5prime_partial	(-),score=45.72,ST1C2_HUMAN	High	38.911 1.13e-53,Sulfotransfer_1|PF00685.27|6.2e-64,Sulfotransfer_3|PF13469.6|0.8,Sulfotransfer_3|PF13469.6|1.7e-05 OFAVBQ_DN202044_c1_g3_i2:9-749(-)	0.12	0	7	2	2	2	1	246	28.4	6.96	0	2																Low	Not Found	Low	Low	Low	Not Found	Not Found	Low
OFAVBQ_DN153532_c0_g1_i1.p1	type:complete	(-),score=34.17,MCATL_BOVIN	High	38.406 6.98e-54,MCATL_BOVIN|28.877|2.26e-15,Mito_carr|PF00153.27|1.8e-16,Mito_carr|PF00153.27|1.3e-21,Mito_carr|PF00153.27|2.8e-22 OFAVBQ_DN153532_c0_g1_i1:653-1564(-)	0.121	0	3	1	2	1	1	303	33.3	9.6	0	1																Low	Not Found	Low	Low	Low	Low	Low	Low
OFAVBQ_DN219660_c5_g3_i2.p1	type:complete	(-),score=245.64,ABL1_MOUSE	High	69.620 0.0,Pkinase_Tyr|PF07714.17|1.7e-97,Pkinase|PF00069.25|5.7e-48,SH2|PF00017.24|4.7e-23,SH2|PF00017.24|1.1e+04,SH2|PF00017.24|7.9e+03,SH3_1|PF00018.28|7e-09,SH3_2|PF07653.17|3.9e-07,SH3_9|PF14604.6|6.3e-07,F_actin_bind|PF08919.10|0.021,Haspin_kinase|PF12330.8|0.014,Haspin_kinase|PF12330.8|1.8e+04,MAP17|PF15807.5|10 OFAVBQ_DN219660_c5_g3_i2:569-3784(-)	0.121	0	3	3	3	3	1	1071	118.6	8.79	0	3	1.394	0.781	1.768	1.019	1.932	1.451	1.456	74.1	103.2	57.8	131	75.5	143.1	107.5	107.8	Low	Low	Low	Low	Low	Low	Low	Low
OFAVBQ_DN209693_c3_g1_i7.p2	type:complete	(-),score=29.61,MYO6_HUMAN	High	48.193 7.76e-18,Myosin_head|PF00063.21|4.4e-15,Telomere_Sde2_2|PF13297.6|0.14 OFAVBQ_DN209693_c3_g1_i7:1097-1390(-)	0.121	0	8	1	1	1	1	97	10.4	5.34	0	1	1.418	0.873	1.199	1.026	0.683	0.9	0.588	104.1	147.6	90.8	124.8	106.7	71.1	93.6	61.2	Low	Low	Low	Low	Low	Low	Low	Low
OFAVBQ_DN221603_c1_g4_i2.p1	type:complete	(-),score=161.48,NAC1_RAT	High	53.441 0.0,Calx-beta|PF03160.14|1.1e-29,Calx-beta|PF03160.14|2.1e-28,Na_Ca_ex|PF01699.24|2.4e-26,Na_Ca_ex|PF01699.24|2e-23,Na_Ca_ex_C|PF16494.5|3.4e-36,Cupin_3|PF05899.12|24,Cupin_3|PF05899.12|3.4,DUF2564|PF10819.8|1.4e+03,DUF2564|PF10819.8|0.14 OFAVBQ_DN221603_c1_g4_i2:1831-4590(-)	0.121	0	1	1	2	1	1	919	100.8	5.01	0	1																Low	Low	Low	Low	Low	Low	Low	Low
OFAVBQ_DN220694_c0_g2_i1.p1	type:5prime_partial	(-),score=12.64,S6A15_MOUSE	High	63.830 3.33e-16,SNF|PF00209.18|2.5e-18 OFAVBQ_DN220694_c0_g2_i1:961-1176(-)	0.088	0	15	1	1	1	1	71	7.6	10.01	0	1																Low	Low	Low	Low	Low	Low	Low	Low
OFAVBQ_DN39995_c0_g1_i1.p1	type:internal	(-),score=16.72,PLK1_MOUSE	High	64.356 5.46e-43,Pkinase|PF00069.25|2.3e-18,Pkinase_Tyr|PF07714.17|6.4e-07 OFAVBQ_DN39995_c0_g1_i1:2-304(-)	0.106	0	8	1	1	1	1	101	12	9.67	0	1																Low	Not Found	Low	Low	Low	Low	Low	Low
OFAVBQ_DN88204_c0_g1_i1.p1	type:5prime_partial	(-),score=13.43,RTCB_CHLRE	High	87.500 1.31e-36,RtcB|PF01139.17|7.3e-15 OFAVBQ_DN88204_c0_g1_i1:213-431(-)	0.088	0	17	1	2	1	1	72	8	9.64	0	1																Low	Not Found	Low	Low	Not Found	Low	Low	Low
OFAVBQ_DN220011_c1_g1_i7.p2			High	OFAVBQ_DN220011_c1_g1~~OFAVBQ_DN220011_c1_g1_i7.p2 ORF type:complete len:172 (-),score=35.62 OFAVBQ_DN220011_c1_g1_i7:468-983(-)	0.091	0	11	2	7	2	1	171	19.3	9.23	0	2	1.684	4.035	1.528	1.728	0.87	1.081	0.705	63.3	106.6	255.6	96.8	109.5	55.1	68.4	44.7	Low	Low	Low	Low	Low	Low	Low	Low
OFAVBQ_DN40964_c0_g1_i1.p1			High	OFAVBQ_DN40964_c0_g1~~OFAVBQ_DN40964_c0_g1_i1.p1 ORF type:complete len:72 (+),score=7.04 OFAVBQ_DN40964_c0_g1_i1:272-487(+)	0.022	0	27	1	1	1	1	71	8.4	9.92	0	1																Not Found	Not Found	Not Found	Low	Low	Low	Not Found	Low
OFAVBQ_DN215364_c0_g1_i4.p1	type:complete	(-),score=210.55,CILP2_HUMAN	High	26.820 4.32e-56,EGF|PF00008.27|2.5e-05,EGF|PF00008.27|7e-06,EGF|PF00008.27|0.00036,EGF|PF00008.27|0.00017,Lectin_C|PF00059.21|1.2e-17,Ig_3|PF13927.6|6.6e-16,Ig_2|PF13895.6|1.7e-13,Ig_2|PF13895.6|1.1e+04,I-set|PF07679.16|1.9e+03,I-set|PF07679.16|2.5e-12,hEGF|PF12661.7|0.0017,hEGF|PF12661.7|0.0049,hEGF|PF12661.7|1.1,hEGF|PF12661.7|0.019,hEGF|PF12661.7|1.2e+04,ig|PF00047.25|5.2e+03,ig|PF00047.25|6.2…	0.022	0	2	2	3	2	1	1071	116	5.54	0	2																Low	Low	Low	Low	Low	Low	Low	Low
OFAVBQ_DN224410_c2_g2_i1.p1	type:internal	(-),score=12.01,ACD11_CAEEL	High	32.787 1.39e-06 OFAVBQ_DN224410_c2_g2_i1:3-233(-)	0.022	0	10	1	3	1	1	77	8.9	6.54	0	1																Low	Low	Low	Low	Low	Low	Low	Low
OFAVBQ_DN205748_c0_g1_i4.p1	type:complete	(-),score=102.21,RHG01_HUMAN	High	48.267 2.41e-114,RhoGAP|PF00620.27|1.1e+04,RhoGAP|PF00620.27|3.5e-43,CRAL_TRIO_2|PF13716.6|2e-33,CRAL_TRIO_2|PF13716.6|5.2e+02,CRAL_TRIO|PF00650.20|1.1e-10,CRAL_TRIO|PF00650.20|3.5e+03,Omega-toxin|PF06357.11|0.41 OFAVBQ_DN205748_c0_g1_i4:855-2612(-)	0.022	0	1	1	1	1	1	585	66	5.9	0	1																Low	Low	Low	Low	Low	Low	Low	Low
OFAVBQ_DN222479_c1_g1_i6.p1			High	OFAVBQ_DN222479_c1_g1~~OFAVBQ_DN222479_c1_g1_i6.p1 ORF type:5prime_partial len:122 (+),score=6.45 OFAVBQ_DN222479_c1_g1_i6:2-367(+)	0.036	0	15	1	2	1	1	121	13.5	9.2	0	1	0.929	1.129	1.53	1.487	2.43	1.367	2.116	66.7	62	75.4	102.1	99.2	162.2	91.2	141.2	Low	Low	Low	Low	Low	Low	Low	Low
OFAVBQ_DN204901_c4_g1_i1.p1	type:complete	(-),score=100.79,NECB_HYDVU	High	45.357 1.36e-164,Peptidase_S8|PF00082.22|3.1e-49,P_proprotein|PF01483.20|5.3e-23,S8_pro-domain|PF16470.5|5.7e-23 OFAVBQ_DN204901_c4_g1_i1:1876-3975(-)	0.025	0	1	1	1	1	1	699	77.7	5.94	0	1																Low	Not Found	Low	Low	Low	Low	Low	Low
OFAVBQ_DN213985_c0_g1_i5.p2	type:complete	(-),score=53.36,ATS6_HUMAN	High	31.511 5.08e-36,ADAM_spacer1|PF05986.14|2.1e-17,TSP_1|PF00090.19|4.4e+03,TSP_1|PF00090.19|2.5e+02,TSP_1|PF00090.19|0.00052,TSP_1|PF00090.19|95 OFAVBQ_DN213985_c0_g1_i5:488-1420(-)	0.097	0	3	1	1	1	1	310	34.5	6.76	0	1	1.011	0.651	1.02	0.721	0.457	0.79	0.515	129.8	131.2	84.5	132.4	93.5	59.3	102.5	66.8	Low	Low	Low	Low	Low	Low	Low	Low
OFAVBQ_DN224555_c2_g1_i5.p1	type:complete	(-),score=165.12,AT11B_HUMAN	High	51.296 0.0,PhoLip_ATPase_C|PF16212.5|3.8e+03,PhoLip_ATPase_C|PF16212.5|1.3e+03,PhoLip_ATPase_C|PF16212.5|2.2e-73,PhoLip_ATPase_N|PF16209.5|8.5e-24,PhoLip_ATPase_N|PF16209.5|7.1e+03,Cation_ATPase|PF13246.6|1.7e-11,Cation_ATPase|PF13246.6|1.3e+03,Hydrolase|PF00702.26|4.5e-08,Hydrolase|PF00702.26|0.59,E1-E2_ATPase|PF00122.20|9.2e-12,E1-E2_ATPase|PF00122.20|2.7e+03,E1-E2_ATPase|PF00122.20|5.1e+03,Hyd…	0.097	0	1	1	2	1	1	1099	125.2	6.51	0	1																Low	Not Found	Low	Low	Low	Not Found	Low	Low
OFAVBQ_DN186825_c0_g2_i1.p1	type:5prime_partial	(-),score=51.73,RL10A_RAT	High	74.654 1.58e-105,Ribosomal_L1|PF00687.21|9.7e-49 OFAVBQ_DN186825_c0_g2_i1:34-714(-)	0.022	0	5	1	1	1	1	226	25.6	9.74	0	1																Low	Not Found	Low	Low	Low	Low	Low	Low
OFAVBQ_DN224688_c0_g1_i6.p1	type:complete	(-),score=211.94,BEN	High	PF10523.9 4.6e+02,BEN|PF10523.9|7.5e-06,BEN|PF10523.9|2.8e-05,Snapin_Pallidin|PF14712.6|0.15,Snapin_Pallidin|PF14712.6|1.7e+04,Lectin_N|PF03954.14|1.7 OFAVBQ_DN224688_c0_g1_i6:3724-6822(-)	0.097	0	1	1	1	1	1	1032	111.8	6.67	0	1	1.919	0.899	0.954	1.1	0.43	1.508	0.596	95.2	182.6	85.5	90.8	104.7	41	143.5	56.7	Low	Low	Low	Low	Low	Low	Low	Low
OFAVBQ_DN135788_c0_g1_i1.p1	type:3prime_partial	(-),score=11.73,Med15_fungi	High	PF05397.12 0.25 OFAVBQ_DN135788_c0_g1_i1:3-671(-)	0.097	0	7	1	2	1	1	223	25.3	8.72	0	1	0.921	1.17	0.91	1.125	1.46	1.389	1.681	82.8	76.3	97	75.4	93.2	121	115.1	139.2	Low	Low	Low	Low	Low	Low	Low	Low
OFAVBQ_DN195546_c0_g1_i1.p1	type:3prime_partial	(-),score=25.08,ACOX3_PONAB	High	47.222 5.04e-53,Acyl-CoA_ox_N|PF14749.6|3.2e-08,Acyl-CoA_dh_M|PF02770.19|0.00024 OFAVBQ_DN195546_c0_g1_i1:1-606(-)	0.097	0	7	2	2	2	1	202	23.6	6.96	0	2																Low	Not Found	Low	Low	Low	Low	Low	Low
OFAVBQ_DN223510_c2_g1_i16.p1	type:complete	(-),score=64.12,FBX16_HUMAN	High	48.598 1.23e-66,F-box-like|PF12937.7|2.7e-06,F-box|PF00646.33|0.00037,DUF4508|PF14969.6|0.0014,DUF2326|PF10088.9|0.27 OFAVBQ_DN223510_c2_g1_i16:2564-3679(-)	0.098	0	2	1	1	1	1	371	42.5	9.77	0	1																Low	Low	Low	Low	Low	Low	Low	Low
OFAVBQ_DN224160_c2_g1_i3.p1	type:complete	(-),score=430.16,CKAP5_HUMAN	High	48.203 0.0,CLASP_N|PF12348.8|0.084,CLASP_N|PF12348.8|0.00029,CLASP_N|PF12348.8|0.19,CLASP_N|PF12348.8|5.9e-05,CLASP_N|PF12348.8|2.3e-05,CLASP_N|PF12348.8|8.6e+03,HEAT_2|PF13646.6|9.5e+02,HEAT_2|PF13646.6|0.73,HEAT_2|PF13646.6|0.023,HEAT_2|PF13646.6|8e+03,HEAT_2|PF13646.6|1.3,HEAT_2|PF13646.6|12,HEAT_2|PF13646.6|90,HEAT_2|PF13646.6|1.5,HEAT_2|PF13646.6|5,HEAT|PF02985.22|7.3e+03,HEAT|PF02985.22|7.9…	0.098	0	1	2	2	2	1	1834	200.4	8.78	0	2																Low	Low	Low	Low	Low	Low	Low	Low
OFAVBQ_DN219270_c0_g1_i2.p1	type:complete	(-),score=87.52,RB_HUMAN	High	33.037 8.59e-71,RB_A|PF01858.17|4.6e-55,DUF3452|PF11934.8|9.2e+02,DUF3452|PF11934.8|2e-20,DUF3452|PF11934.8|93 OFAVBQ_DN219270_c0_g1_i2:3292-4998(-)	0.098	0	1	1	5	1	1	568	64.7	5.5	0	1	2.054	1.514	1.278	0.414	0.352	1.247	1.146	88.8	182.5	134.5	113.5	36.8	31.3	110.8	101.8	Low	Low	Low	Low	Low	Low	Low	Low
OFAVBQ_DN224018_c6_g1_i9.p1	type:complete	(-),score=6.47,TRAF1_HUMAN	High	28.750 5.93e-06 OFAVBQ_DN224018_c6_g1_i9:282-803(-)	0.098	0	4	1	1	1	1	173	20.3	9.17	0	1	1.132	0.9	1.148	0.847	0.732	1.212	0.766	103.4	117	93	118.7	87.6	75.7	125.3	79.2	Low	Low	Low	Low	Low	Low	Low	Low
OFAVBQ_DN198062_c6_g1_i1.p1	type:complete	(-),score=4.97,UPAR_LY6	High	PF00021.21 5.6e-05,Ninjurin|PF04923.12|0.012 OFAVBQ_DN198062_c6_g1_i1:734-1195(-)	0.098	0	9	1	1	1	1	153	17.7	7.64	0	1																Low	Not Found	Low	Not Found	Low	Not Found	Low	Not Found
OFAVBQ_DN198555_c0_g1_i1.p1	type:complete	(-),score=71.80,BHMT1_BOVIN	High	60.714 8.05e-164,S-methyl_trans|PF02574.16|6.7e-44,AP_endonuc_2|PF01261.24|2.7,AP_endonuc_2|PF01261.24|0.065,Thr_synth_N|PF14821.6|7.6e+03,Thr_synth_N|PF14821.6|7.2e+03,Thr_synth_N|PF14821.6|0.38,DUF2529|PF10740.9|0.34 OFAVBQ_DN198555_c0_g1_i1:2356-3462(-)	0.098	0	5	2	2	2	1	368	40.4	6.2	0	2																Low	Not Found	Low	Low	Low	Low	Low	Low
OFAVBQ_DN220102_c0_g1_i3.p1	type:complete	(-),score=93.74,MINY4_MOUSE	High	41.667 4.11e-36,DUF4205|PF13898.6|1.7e-35 OFAVBQ_DN220102_c0_g1_i3:1850-3397(-)	0.097	0	4	3	3	3	1	515	56.7	9.44	0	3																Low	Low	Low	Low	Low	Low	Low	Low
OFAVBQ_DN221871_c0_g2_i1.p1	type:complete	(-),score=286.12,CLIP1_MOUSE	High	24.479 3.54e-09,CAP_GLY|PF01302.25|3.2e-13,HMMR_N|PF15905.5|1.8e+04,HMMR_N|PF15905.5|7.2e+03,HMMR_N|PF15905.5|1.3e+03,HMMR_N|PF15905.5|0.0034,HMMR_N|PF15905.5|3.4e+03,HMMR_N|PF15905.5|5.9e+02,Cnn_1N|PF07989.11|4e+02,Cnn_1N|PF07989.11|8.4e+02,Cnn_1N|PF07989.11|5.5e+02,Cnn_1N|PF07989.11|0.0066,Cnn_1N|PF07989.11|1.8e+04,Cnn_1N|PF07989.11|1.8e+04,Cnn_1N|PF07989.11|1.8e+04,Cnn_1N|PF07989.11|1.8e+04,Fe…	0.095	0	1	1	3	1	1	1001	114.1	5.67	0	1																Low	Low	Low	Low	Low	Low	Low	Low
OFAVBQ_DN217008_c0_g1_i1.p1	type:complete	(-),score=154.93,COIL_XENLA	High	37.607 3.78e-14,COIL_XENLA|29.730|3.21e-11,Coilin_N|PF15862.5|1.9e-23,Coilin_N|PF15862.5|1.4e+04,Coilin_N|PF15862.5|1.8e+04,Coilin_N|PF15862.5|1.8e+04,RepB|PF07506.11|16,RepB|PF07506.11|4.5 OFAVBQ_DN217008_c0_g1_i1:1414-3513(-)	0.022	0	3	2	2	2	1	699	77	8.73	0	2	2.279	0.45	0.415	0.438	0.211	0.436	0.36	143.1	326.3	64.5	59.4	62.7	30.2	62.3	51.5	Low	Low	Low	Low	Low	Low	Low	Low
OFAVBQ_DN216353_c1_g2_i1.p1	type:5prime_partial	(-),score=80.27,CHRD_XENLA	High	31.216 2.68e-141,VWC|PF00093.18|4.2e-08,VWC|PF00093.18|1.3e+04,VWC|PF00093.18|1.8e-08,VWC|PF00093.18|2.3e-07,VWC|PF00093.18|4.7e-08,CHRD|PF07452.12|2.8,CHRD|PF07452.12|2.2e+02,CHRD|PF07452.12|1.6e-07,CHRD|PF07452.12|6.9e-12,TILa|PF12714.7|1.8e+04,TILa|PF12714.7|0.0084,TILa|PF12714.7|0.74,TILa|PF12714.7|0.33 OFAVBQ_DN216353_c1_g2_i1:1293-4007(-)	0.022	0	1	1	1	1	1	904	101	8.59	0	1																Low	Low	Low	Low	Low	Low	Low	Low
OFAVBQ_DN218766_c3_g3_i1.p1	type:internal	(+),score=41.66,YTX2_XENLA	High	24.454 1.26e-10,RVT_1|PF00078.27|4.8e-17 OFAVBQ_DN218766_c3_g3_i1:2-700(+)	0.022	0	3	1	1	1	1	233	26.5	8.75	0	1																Low	Low	Low	Low	Low	Low	Low	Low
OFAVBQ_DN223082_c3_g1_i4.p1	type:complete	(-),score=682.13,SPTN1_RAT	High	59.458 0.0,SPTN1_RAT|29.557|5.84e-96,SPTN1_RAT|25.264|9.82e-80,SPTN1_RAT|25.251|2.47e-40,Spectrin|PF00435.21|0.21,Spectrin|PF00435.21|7.9e-23,Spectrin|PF00435.21|8e-26,Spectrin|PF00435.21|2.8e-16,Spectrin|PF00435.21|2.3e-22,Spectrin|PF00435.21|2.1e-24,Spectrin|PF00435.21|2.1e-22,Spectrin|PF00435.21|2.9e-25,Spectrin|PF00435.21|1.1e-13,Spectrin|PF00435.21|0.42,Spectrin|PF00435.21|5.4e-20,Spectrin|P…	0.022	0	0	1	1	1	1	2304	266.5	5.02	0	1																Low	Not Found	Low	Low	Low	Low	Low	Low
OFAVBQ_DN199585_c6_g2_i4.p1	type:complete	(-),score=69.80,PROD_MOUSE	High	51.200 3.47e-87,Pro_dh|PF01619.18|7.5e-73 OFAVBQ_DN199585_c6_g2_i4:67-1026(-)	0.022	0	3	1	1	1	1	319	36	7.71	0	1																Low	Not Found	Low	Low	Low	Low	Low	Low
OFAVBQ_DN157849_c0_g2_i1.p1	type:internal	(-),score=10.72,PK1L2_HUMAN	High	25.000 5.34e-09,Cadherin_C_2|PF16492.5|38,Cadherin_C_2|PF16492.5|21 OFAVBQ_DN157849_c0_g2_i1:2-391(-)	0.022	0	7	1	1	1	1	130	15.6	9.86	0	1																Low	Not Found	Low	Low	Low	Low	Low	Low
OFAVBQ_DN145815_c0_g3_i1.p1	type:internal	(-),score=9.76,DC12A_XENLA	High	39.080 5.27e-11 OFAVBQ_DN145815_c0_g3_i1:2-550(-)	0.022	0	5	1	2	1	1	183	20	9.99	0	1																Low	Low	Low	Low	Low	Low	Low	Low
OFAVBQ_DN161469_c0_g1_i1.p1	type:5prime_partial	(-),score=8.18,RL18A_HUMAN	High	72.727 1.65e-94,Ribosomal_L18A|PF01775.17|4.5e-53 OFAVBQ_DN161469_c0_g1_i1:40-576(-)	0.022	0	4	1	1	1	1	178	21.2	10.59	0	1																Low	Not Found	Low	Low	Low	Low	Low	Low
OFAVBQ_DN221744_c2_g1_i1.p1	type:complete	(-),score=20.49,F-box-like	High	PF12937.7 1.2e-11,F-box|PF00646.33|0.0064,IL15|PF02372.15|0.022 OFAVBQ_DN221744_c2_g1_i1:990-2519(-)	0.022	0	1	1	1	1	1	509	58.6	8.09	0	1																Low	Low	Low	Low	Low	Low	Low	Low
OFAVBQ_DN212329_c11_g1_i7.p1	type:complete	(-),score=53.77,ETRAMP	High	PF09716.10 4.2e+03,ETRAMP|PF09716.10|0.0072 OFAVBQ_DN212329_c11_g1_i7:873-1745(-)	0.022	0	8	1	1	1	1	290	32.2	5.54	0	1																Not Found	Not Found	Not Found	Not Found	Not Found	Not Found	Not Found	Low
OFAVBQ_DN206485_c8_g1_i2.p1	type:complete	(-),score=58.69,SOX_HUMAN	High	45.596 1.49e-126,DAO|PF01266.24|1.2e-48,NAD_binding_8|PF13450.6|9.5e-05,NAD_binding_8|PF13450.6|1.1e+03,GIDA|PF01134.22|0.11,GIDA|PF01134.22|7.6,GIDA|PF01134.22|3.8e+03,FAD_binding_3|PF01494.19|0.0017,Pyr_redox_2|PF07992.14|0.021,Pyr_redox_2|PF07992.14|1e+03,HI0933_like|PF03486.14|1.4,HI0933_like|PF03486.14|3.2,HI0933_like|PF03486.14|6.3e+03,Thi4|PF01946.17|0.11,Thi4|PF01946.17|4.6e+03,FAD_oxidor…	0.022	0	2	1	1	1	1	394	43.4	7.68	0	1																Low	Not Found	Low	Low	Low	Not Found	Low	Low
OFAVBQ_DN225048_c1_g1_i3.p1	type:complete	(-),score=483.03,NINL_MOUSE	High	29.894 2.82e-60,EF-hand_7|PF13499.6|0.0001,EF-hand_7|PF13499.6|1e-08,EF-hand_7|PF13499.6|1.9e+02,EF-hand_7|PF13499.6|6.3e+03,EF-hand_1|PF00036.32|0.071,EF-hand_1|PF00036.32|3.5e+02,EF-hand_1|PF00036.32|1.1e+03,EF-hand_1|PF00036.32|0.00016,EF-hand_1|PF00036.32|9.9e+03,EF-hand_1|PF00036.32|9.2e+03,EF-hand_6|PF13405.6|0.021,EF-hand_6|PF13405.6|7.6e+03,EF-hand_6|PF13405.6|3.5e+02,EF-hand_6|PF13405.6|…	0.022	0	1	1	1	1	1	1803	209.4	4.93	0	1																Not Found	Not Found	Not Found	Not Found	Not Found	Not Found	Low	Not Found
OFAVBQ_DN225041_c1_g1_i1.p1	type:complete	(-),score=1042.62,HYDIN_HUMAN	High	43.625 0.0,ASH|PF15780.5|0.034,ASH|PF15780.5|3.6,ASH|PF15780.5|98,ASH|PF15780.5|0.00018,ASH|PF15780.5|1.1e+02,ASH|PF15780.5|0.27,ASH|PF15780.5|1.6e+04,ASH|PF15780.5|1,ASH|PF15780.5|1.7e+02,ASH|PF15780.5|0.83,ASH|PF15780.5|1.7e+02,ASH|PF15780.5|1.2e+04,ASH|PF15780.5|0.0072,ASH|PF15780.5|2.4e+02,ASH|PF15780.5|3.7e+03,ASH|PF15780.5|5.3,ASH|PF15780.5|3.2e+03,ASH|PF15780.5|0.4,ASH|PF15780.5|5.2,ASH|PF…	0.022	0	0	1	1	1	1	5137	568.3	6.24	0	1																Low	Low	Low	Low	Low	Low	Low	Low
OFAVBQ_DN221483_c1_g2_i1.p1			High	OFAVBQ_DN221483_c1_g2~~OFAVBQ_DN221483_c1_g2_i1.p1 ORF type:5prime_partial len:111 (+),score=12.12 OFAVBQ_DN221483_c1_g2_i1:3-335(+)	0.022	0	19	2	2	2	1	110	11.8	7.75	0	2																Low	Low	Low	Low	Low	Low	Low	Low
OFAVBQ_DN201848_c0_g1_i2.p1	type:complete	(-),score=61.79,KLH20_MOUSE	High	40.653 3.98e-81,KLH20_MOUSE|42.424|1.73e-07,KLH20_MOUSE|37.500|9.75e-06,BTB|PF00651.31|2.1e-29,BACK|PF07707.15|6.5e+03,BACK|PF07707.15|5.4e-26,Kelch_1|PF01344.25|7.4e-08,Kelch_1|PF01344.25|0.0043,Kelch_6|PF13964.6|1.8e+04,Kelch_6|PF13964.6|0.0002,Kelch_6|PF13964.6|3.9e+02,Kelch_4|PF13418.6|0.0045,Kelch_4|PF13418.6|2.2e+02,Kelch_2|PF07646.15|0.42,Kelch_2|PF07646.15|3,DUF3342|PF11822.8|0.022,DUF334…	0.023	0	2	1	1	1	1	458	51.7	6.28	0	1																Not Found	Not Found	Not Found	Not Found	Not Found	Not Found	Not Found	Not Found
OFAVBQ_DN329013_c0_g1_i1.p2	type:internal	(+),score=14.25,COA_ACRMI	High	53.623 1.55e-08,COA_ACRMI|48.101|1.69e-06,Collagen|PF01391.18|2e-09 OFAVBQ_DN329013_c0_g1_i1:2-211(+)	0.023	0	17	1	2	1	1	70	6.3	10.17	0	1																Low	Not Found	Low	Low	Low	Low	Low	Low
OFAVBQ_DN208397_c1_g1_i2.p1	type:complete	(-),score=142.56,EIF3B_MOUSE	High	61.393 0.0,eIF2A|PF08662.11|0.0087,eIF2A|PF08662.11|5e+03,eIF2A|PF08662.11|5.1e-62,RRM_1|PF00076.22|2.3e-08,ANAPC4_WD40|PF12894.7|7.6e+02,ANAPC4_WD40|PF12894.7|2.8e+03,ANAPC4_WD40|PF12894.7|2.5e+02,ANAPC4_WD40|PF12894.7|6.1,ANAPC4_WD40|PF12894.7|60,ANAPC4_WD40|PF12894.7|7.2e+02,TFIIIC_delta|PF12657.7|7.8e+03,TFIIIC_delta|PF12657.7|1.2e+02,TFIIIC_delta|PF12657.7|0.27,IKI3|PF04762.12|1.8e+03,IKI3|P…	0.023	0	1	1	1	1	1	705	81.7	5.16	0	1																Low	Low	Low	Low	Low	Low	Low	Low
OFAVBQ_DN210727_c3_g2_i4.p5	type:complete	(+),score=38.43,Peptidase_A17	High	PF05380.13 4.8e-24,Peptidase_S9_N|PF02897.15|0.12 OFAVBQ_DN210727_c3_g2_i4:3583-4134(+)	0.023	0	4	1	2	1	1	183	21.2	4.88	0	1																Low	Not Found	Low	Low	Low	Low	Low	Low
OFAVBQ_DN215133_c0_g2_i2.p2			High	OFAVBQ_DN215133_c0_g2~~OFAVBQ_DN215133_c0_g2_i2.p2 ORF type:5prime_partial len:79 (+),score=8.23 OFAVBQ_DN215133_c0_g2_i2:2-238(+)	0.022	0	10	1	3	1	1	78	8.8	8.97	0	1	1.114	1.052	1.104	1.506	0.603	1.241	0.7	96.2	107.1	101.2	106.2	144.8	58	119.3	67.3	Low	Low	Low	Low	Low	Low	Low	Low
OFAVBQ_DN200655_c1_g2_i1.p1	type:complete	(-),score=22.60,CHST6_HUMAN	High	28.779 4.32e-31,Sulfotransfer_1|PF00685.27|4.7e-22,Sulfotransfer_3|PF13469.6|0.0042,Sulfotransfer_3|PF13469.6|3.5e-07 OFAVBQ_DN200655_c1_g2_i1:618-1802(-)	0.022	0	2	1	1	1	1	394	46	9.67	0	1																Not Found	Not Found	Low	Low	Not Found	Not Found	Low	Low
OFAVBQ_DN223916_c2_g1_i9.p1	type:complete	(-),score=218.73,TRPC4_HUMAN	High	25.207 1.09e-17,VWA|PF00092.28|8.8e-09,Ion_trans|PF00520.31|6.7e+03,Ion_trans|PF00520.31|9.6e-09,SPRY|PF00622.28|0.00021,Epimerase_2|PF02350.19|0.028,Epimerase_2|PF02350.19|73,DUF2564|PF10819.8|0.037,Lig_chan|PF00060.26|6.9e+03,Lig_chan|PF00060.26|0.072,Col_cuticle_N|PF01484.17|4.3e+03,Col_cuticle_N|PF01484.17|0.19,YlbD_coat|PF14071.6|1.6,YlbD_coat|PF14071.6|2.9e+02,YlbD_coat|PF14071.6|3.1e+03 OF…	0.022	0	1	1	1	1	1	1263	146	6.96	0	1																Low	Not Found	Low	Low	Low	Not Found	Low	Low
OFAVBQ_DN220419_c0_g1_i1.p1	type:complete	(-),score=138.39,ATP7B_HUMAN	High	37.908 3.16e-107,ATP7B_HUMAN|30.827|7.09e-63,ATP7B_HUMAN|31.818|4.23e-43,HMA|PF00403.26|9.3e+03,HMA|PF00403.26|1.9e-11,HMA|PF00403.26|9.5e-14,HMA|PF00403.26|9.9e-17,HMA|PF00403.26|5.2e-13,HMA|PF00403.26|5.4e+03,HMA|PF00403.26|5.3e-09,HMA|PF00403.26|2.8e-12,RRM_3|PF08777.11|0.37,RRM_3|PF08777.11|4.1e+02,RRM_3|PF08777.11|0.073,RRM_3|PF08777.11|2.1e+03,RRM_3|PF08777.11|1.6e+03,DHNA|PF04038.12|1.1e+0…	0.096	0	4	3	6	3	1	578	62.5	5.06	0	3	0.01	1.235	0.877	1.316	1.026	1.293	1.146	101.3		125.2	88.9	133.4	103.9	131.1	116.2	Low	Low	Low	Low	Low	Low	Low	Low
OFAVBQ_DN212777_c6_g1_i7.p4	type:complete	(-),score=12.73,NOC3p	High	PF07540.11 0.024 OFAVBQ_DN212777_c6_g1_i7:3181-3480(-)	0.095	0	10	1	1	1	1	99	11.4	7.84	0	1																Low	Not Found	Low	Low	Low	Not Found	Low	Low
OFAVBQ_DN219750_c4_g1_i7.p1	type:complete	(-),score=13.63,TLR2_BOSTR	High	25.843 9.97e-06,TIR_2|PF13676.6|8.4e-08 OFAVBQ_DN219750_c4_g1_i7:1819-2232(-)	0.095	0	6	1	1	1	1	137	15.8	7.3	0	1																Low	Low	Low	Low	Low	Low	Low	Low
OFAVBQ_DN198173_c7_g4_i1.p1	type:5prime_partial	(-),score=38.08,DUF1002	High	PF06207.11 0.14,Aminopep|PF10023.9|0.92,ZYG-11_interact|PF05884.12|1.2,DUF5427|PF10310.9|5.8,Presenilin|PF01080.17|5.7,CorA|PF01544.18|8.6 OFAVBQ_DN198173_c7_g4_i1:362-859(-)	0.099	0	7	1	1	1	1	165	19.8	9.36	0	1																Low	Not Found	Low	Low	Low	Low	Low	Low
OFAVBQ_DN196328_c0_g1_i1.p1			High	OFAVBQ_DN196328_c0_g1~~OFAVBQ_DN196328_c0_g1_i1.p1 ORF type:complete len:77 (-),score=10.70 OFAVBQ_DN196328_c0_g1_i1:506-736(-)	0.099	0	20	1	1	1	1	76	8.6	11.49	0	1																Not Found	Not Found	Not Found	Not Found	Not Found	Not Found	Not Found	Low
OFAVBQ_DN224089_c1_g2_i1.p4			High	OFAVBQ_DN224089_c1_g2~~OFAVBQ_DN224089_c1_g2_i1.p4 ORF type:complete len:92 (+),score=3.05 OFAVBQ_DN224089_c1_g2_i1:1205-1480(+)	0.1	0	19	1	1	1	1	91	10.3	8.97	0	1																Not Found	Not Found	Not Found	Not Found	Not Found	Not Found	Not Found	Not Found
OFAVBQ_DN214233_c2_g4_i1.p1	type:internal	(+),score=13.65,POGK_MOUSE	High	33.333 9.27e-06,DDE_1|PF03184.19|0.0074 OFAVBQ_DN214233_c2_g4_i1:1-249(+)	0.1	0	18	1	3	1	1	83	9.4	9.99	0	1	0.01	1.56	1.304	1.655	1.865	1.776	2.46	68.8		107.4	89.8	113.9	128.4	122.3	169.4	Low	Not Found	Low	Low	Low	Low	Low	Low
OFAVBQ_DN220002_c0_g2_i1.p1	type:5prime_partial	(-),score=64.34,ENTP5_RAT	High	48.469 1.65e-117,GDA1_CD39|PF01150.17|5.4e-75,PAH|PF02671.21|0.12 OFAVBQ_DN220002_c0_g2_i1:2592-4046(-)	0.1	0	3	1	1	1	1	484	53.7	8.5	0	1																Low	Low	Low	Low	Low	Low	Low	Low
OFAVBQ_DN218389_c1_g1_i5.p1	type:complete	(-),score=328.74,MATN2_HUMAN	High	34.663 7.75e-53,MATN2_HUMAN|30.193|1.05e-49,MATN2_HUMAN|37.410|1.49e-18,MATN2_HUMAN|32.787|1.24e-09,cEGF|PF12662.7|2.2e+02,cEGF|PF12662.7|0.0048,cEGF|PF12662.7|0.00031,cEGF|PF12662.7|0.06,cEGF|PF12662.7|0.0077,cEGF|PF12662.7|8.5e-07,cEGF|PF12662.7|1.7e-07,cEGF|PF12662.7|0.37,cEGF|PF12662.7|1.7e+03,cEGF|PF12662.7|4.6e+03,FXa_inhibition|PF14670.6|0.00054,FXa_inhibition|PF14670.6|0.53,FXa_inhibition…	0.1	0	1	2	3	2	1	2813	312.6	7.96	0	2																Low	Low	Low	Low	Low	Low	Low	Low
OFAVBQ_DN225266_c3_g2_i1.p1			High	OFAVBQ_DN225266_c3_g2~~OFAVBQ_DN225266_c3_g2_i1.p1 ORF type:internal len:230 (-),score=22.01 OFAVBQ_DN225266_c3_g2_i1:2-688(-)	0.098	0	3	1	2	1	1	229	25.9	5.82	0	1																Low	Low	Low	Low	Low	Low	Low	Low
OFAVBQ_DN155591_c0_g2_i1.p1	type:5prime_partial	(-),score=50.48,TRYP_ASTAS	High	39.056 1.87e-46,Trypsin|PF00089.26|2.3e-57,Trypsin_2|PF13365.6|0.00033,DUF1986|PF09342.11|0.00097 OFAVBQ_DN155591_c0_g2_i1:22-858(-)	0.095	0	3	1	1	1	1	278	29.7	4.55	0	1																Low	Not Found	Low	Low	Low	Low	Low	Low
OFAVBQ_DN185756_c0_g1_i1.p1	type:complete	(-),score=35.74,THEGL_HUMAN	High	35.185 2.65e-16,THEG|PF14912.6|1.5e-15,THEG|PF14912.6|0.0022,THEG|PF14912.6|8.8e-17 OFAVBQ_DN185756_c0_g1_i1:148-846(-)	0.099	0	11	2	3	2	1	232	25.9	10.05	0	2																Low	Low	Low	Low	Low	Low	Low	Low
OFAVBQ_DN210748_c2_g2_i1.p1	type:5prime_partial	(-),score=46.66,KLHL2_HUMAN	High	25.956 3.57e-26,KLHL2_HUMAN|24.832|4.65e-06,Kelch_1|PF01344.25|24,Kelch_1|PF01344.25|1.6e-09,Kelch_1|PF01344.25|0.00016,Kelch_1|PF01344.25|1.4e-07,Kelch_6|PF13964.6|1.5e+02,Kelch_6|PF13964.6|1.2e+03,Kelch_6|PF13964.6|7.6e-09,Kelch_6|PF13964.6|0.00048,Kelch_6|PF13964.6|5.5e-06,Kelch_4|PF13418.6|1.1e+04,Kelch_4|PF13418.6|1.2e-07,Kelch_4|PF13418.6|20,Kelch_4|PF13418.6|41,BACK|PF07707.15|2.2e-10,BACK…	0.091	0	3	1	1	1	1	405	46.1	4.93	0	1																Low	Low	Low	Low	Low	Low	Low	Low
OFAVBQ_DN209320_c0_g2_i5.p3			High	OFAVBQ_DN209320_c0_g2~~OFAVBQ_DN209320_c0_g2_i5.p3 ORF type:complete len:83 (-),score=3.49 OFAVBQ_DN209320_c0_g2_i5:3385-3633(-)	0.09	0	10	1	1	1	1	82	9.5	9.45	0	1																Low	Not Found	Low	Low	Low	Low	Low	Low
OFAVBQ_DN150580_c0_g2_i2.p1	type:internal	(-),score=34.32,EI2BD_MOUSE	High	49.198 2.93e-52,IF-2B|PF01008.17|2.3e-51 OFAVBQ_DN150580_c0_g2_i2:1-573(-)	0.09	0	6	1	1	1	1	191	21	9.03	0	1																Low	Not Found	Low	Low	Low	Not Found	Low	Not Found
OFAVBQ_DN219189_c2_g2_i3.p1	type:complete	(-),score=70.54,WDR18_HUMAN	High	39.912 4.49e-112,WD40|PF00400.32|3.9e+03,WD40|PF00400.32|2.1e+03,WD40|PF00400.32|51,WD40|PF00400.32|0.0004,WD40|PF00400.32|15,WD40|PF00400.32|1.4e+03,WD40|PF00400.32|2.6e-06,WD40|PF00400.32|1.4e+04,ANAPC4_WD40|PF12894.7|7.8e+02,ANAPC4_WD40|PF12894.7|1.1,ANAPC4_WD40|PF12894.7|2e+03,ANAPC4_WD40|PF12894.7|0.11,WD40_alt|PF14077.6|0.0037 OFAVBQ_DN219189_c2_g2_i3:396-1781(-)	0.09	0	2	1	1	1	1	461	50.8	7.18	0	1																Low	Not Found	Low	Low	Low	Low	Low	Low
OFAVBQ_DN222011_c1_g1_i1.p1	type:complete	(-),score=49.84,HS3SB_MOUSE	High	50.704 3.61e-100,Sulfotransfer_1|PF00685.27|1e-34,Sulfotransfer_3|PF13469.6|0.073,Sulfotransfer_3|PF13469.6|8.2e-09 OFAVBQ_DN222011_c1_g1_i1:1192-2541(-)	0.09	0	3	2	2	1	1	449	51.6	9.51	0	2																Low	Not Found	Low	Low	Low	Low	Low	Low
OFAVBQ_DN5875_c0_g1_i1.p1	type:internal	(-),score=17.28,YRD6_CAEEL	High	44.565 1.80e-14 OFAVBQ_DN5875_c0_g1_i1:1-270(-)	0.09	0	10	1	1	1	1	90	9.8	5.17	0	1																Low	Low	Low	Low	Low	Low	Low	Low
OFAVBQ_DN214260_c4_g2_i3.p1			High	OFAVBQ_DN214260_c4_g2~~OFAVBQ_DN214260_c4_g2_i3.p1 ORF type:complete len:430 (-),score=73.86 OFAVBQ_DN214260_c4_g2_i3:838-2127(-)	0.091	0	2	1	1	1	1	429	48.6	9.19	0	1	1.366	0.546	0.844	0.967	0.681	0.914	0.574	116.1	158.6	63.4	97.9	112.3	79.1	106	66.6	Low	Low	Low	Low	Low	Low	Low	Low
OFAVBQ_DN218277_c0_g5_i1.p1			High	OFAVBQ_DN218277_c0_g5~~OFAVBQ_DN218277_c0_g5_i1.p1 ORF type:5prime_partial len:80 (-),score=11.45 OFAVBQ_DN218277_c0_g5_i1:80-319(-)	0.091	0	13	1	1	1	1	79	9	6	0	1																Low	Low	Low	Low	Low	Low	Low	Low
OFAVBQ_DN126453_c0_g1_i1.p1	type:internal	(-),score=23.11,DYN_DROME	High	73.438 2.92e-61,PH|PF00169.29|7e+03,PH|PF00169.29|6.6e-07,Dynamin_M|PF01031.20|7.1e-06,FumaraseC_C|PF10415.9|0.1,FumaraseC_C|PF10415.9|5.5e+03 OFAVBQ_DN126453_c0_g1_i1:2-376(-)	0.091	0	9	1	2	1	1	125	14.6	8.13	0	1																Low	Not Found	Low	Low	Low	Low	Low	Low
OFAVBQ_DN208590_c2_g4_i1.p1	type:internal	(-),score=71.19,ZU5	High	PF00791.20 0.0058 OFAVBQ_DN208590_c2_g4_i1:1-951(-)	0.094	0	2	1	1	1	1	317	35.8	5.53	0	1																Low	Low	Low	Low	Low	Low	Low	Low
OFAVBQ_DN220668_c0_g2_i3.p1	type:complete	(-),score=277.31,BUB1B_HUMAN	High	36.232 1.49e-70,BUB1B_HUMAN|23.747|4.40e-15,Mad3_BUB1_I|PF08311.12|2.9e-43,Pkinase|PF00069.25|1.1e-14,Pkinase_Tyr|PF07714.17|5e-06,Pox_ser-thr_kin|PF05445.11|0.12,Kinase-like|PF14531.6|0.28 OFAVBQ_DN220668_c0_g2_i3:761-4792(-)	0.099	0	1	2	3	2	1	1343	149.1	5.44	0	2																Low	Not Found	Low	Low	Low	Low	Low	Low
OFAVBQ_DN199799_c0_g1_i1.p1	type:internal	(-),score=148.46,TRAP-gamma	High	PF07074.12 0.09,DUF1515|PF07439.11|0.29,DUF4988|PF16378.5|0.43,DUF4988|PF16378.5|8.9e+03,IF-2B|PF01008.17|1.8,NPV_P10|PF05531.12|16,NPV_P10|PF05531.12|46,V_ATPase_I|PF01496.19|3,V_ATPase_I|PF01496.19|78,HSCB_C|PF07743.13|1e+02,HSCB_C|PF07743.13|1.2e+02 OFAVBQ_DN199799_c0_g1_i1:2-2569(-)	0.099	0	2	2	2	2	1	856	97.5	7.12	0	2																Low	Low	Low	Low	Low	Low	Low	Low
OFAVBQ_DN109479_c0_g1_i1.p1	type:complete	(-),score=39.49,OBSTE_DROME	High	28.807 2.72e-18,CBM_14|PF01607.24|3.1e-11,CBM_14|PF01607.24|1.4e-11,CBM_14|PF01607.24|6.7e-07,CBM_14|PF01607.24|2.4e+02 OFAVBQ_DN109479_c0_g1_i1:102-890(-)	0.099	0	4	1	1	1	1	262	29.5	4.61	0	1																Low	Low	Low	Low	Low	Low	Low	Low
OFAVBQ_DN206656_c4_g9_i1.p1	type:3prime_partial	(-),score=4.66,PH	High	PF00169.29 4.8e-07 OFAVBQ_DN206656_c4_g9_i1:2-208(-)	0.095	0	25	1	1	1	1	69	8.2	5.06	0	1																Low	Not Found	Low	Low	Not Found	Not Found	Low	Not Found
OFAVBQ_DN193139_c0_g4_i1.p1	type:5prime_partial	(+),score=-4.57,7tm_1	High	PF00001.21 1.8e-06 OFAVBQ_DN193139_c0_g4_i1:1-351(+)	0.095	0	6	1	4	1	1	116	13.3	10.2	0	1																Low	Low	Low	Low	Low	Low	Low	Low
OFAVBQ_DN218916_c4_g1_i31.p1	type:complete	(-),score=131.02,MRP1_CHICK	High	49.624 0.0,MRP1_CHICK|23.077|3.56e-16,ABC_membrane|PF00664.23|1e-36,ABC_tran|PF00005.27|6.2e-19,SH3_1|PF00018.28|3.1e+02,SH3_1|PF00018.28|0.0011,MMR_HSR1|PF01926.23|0.0049,RsgA_GTPase|PF03193.16|0.0053,SH3_9|PF14604.6|4.5e+03,SH3_9|PF14604.6|0.029,AAA_16|PF13191.6|0.018,Dynamin_N|PF00350.23|0.016,SH3_2|PF07653.17|0.023,AAA_25|PF13481.6|0.025,Zeta_toxin|PF06414.12|0.066,AAA_22|PF13401.6|0.19,AAA_2…	0.095	0	1	1	3	1	1	825	92.3	8.57	0	1																Low	Low	Low	Low	Low	Low	Low	Low
OFAVBQ_DN208181_c0_g1_i1.p1	type:5prime_partial	(-),score=14.25,NPFF2_MOUSE	High	24.385 5.41e-25,7tm_1|PF00001.21|1.1e-28,DUF5305|PF17231.2|1.2,DUF5305|PF17231.2|8.1e+02,DUF5305|PF17231.2|1.2e+03 OFAVBQ_DN208181_c0_g1_i1:116-1549(-)	0.096	0	2	1	3	1	1	477	54	9.88	0	1																Low	Low	Low	Low	Low	Low	Low	Low
OFAVBQ_DN206383_c2_g3_i4.p2	type:complete	(+),score=13.78,SspP	High	PF08179.12 0.27 OFAVBQ_DN206383_c2_g3_i4:1188-1475(+)	0.096	0	9	1	1	1	1	95	10.9	7.34	0	1																Low	Low	Low	Low	Low	Low	Low	Low
OFAVBQ_DN216350_c1_g1_i2.p1	type:complete	(-),score=106.95,SERA_MOUSE	High	51.771 9.01e-122,2-Hacid_dh_C|PF02826.19|4e-56,2-Hacid_dh|PF00389.30|5e-06,IlvN|PF07991.12|0.0045,IlvN|PF07991.12|2.2e+02,NAD_binding_2|PF03446.15|0.022,NAD_binding_2|PF03446.15|1.9e+03,TrkA_N|PF02254.18|0.086,TrkA_N|PF02254.18|5.1e+02,TrkA_N|PF02254.18|1.5e+04,Mid2|PF04478.12|0.17 OFAVBQ_DN216350_c1_g1_i2:933-2198(-)	0.098	0	1	1	1	1	1	421	43.6	7.39	0	1																Low	Not Found	Low	Low	Low	Low	Low	Low
OFAVBQ_DN211056_c0_g2_i3.p1	type:complete	(-),score=139.74,POTE1_MOUSE	High	36.545 4.77e-45,POT1|PF02765.17|1.3e-25,POT1PC|PF16686.5|3.7e+02,POT1PC|PF16686.5|1.2e+02,POT1PC|PF16686.5|2.3e-22,Sorting_nexin|PF03700.13|0.83,Sorting_nexin|PF03700.13|2.2e+03 OFAVBQ_DN211056_c0_g2_i3:227-3007(-)	0.096	0	1	1	1	1	1	926	100.2	8.1	0	1																Low	Not Found	Low	Low	Low	Low	Low	Low
OFAVBQ_DN225435_c1_g1_i1.p1	type:5prime_partial	(-),score=55.57,DDE_Tnp_IS240	High	PF13610.6 0.022,CDC45|PF02724.14|0.34,Ndc1_Nup|PF09531.10|11 OFAVBQ_DN225435_c1_g1_i1:364-834(-)	0.098	0	4	1	1	1	1	156	17.6	5.34	0	1																Low	Low	Low	Low	Low	Low	Low	Low
OFAVBQ_DN219699_c0_g3_i7.p2	type:complete	(-),score=39.36,AHRR_HUMAN	High	35.593 8.60e-25,PAS|PF00989.25|9.7e-07,HLH|PF00010.26|6.9e+03,HLH|PF00010.26|3.7e-05,PAS_3|PF08447.12|0.00071,PAS_9|PF13426.7|0.016,SecD-TM1|PF13721.6|0.13 OFAVBQ_DN219699_c0_g3_i7:3862-4548(-)	0.101	0	4	1	4	1	1	228	25.9	8.35	0	1	2.247	0.854	0.812	0.882	0.896	0.504	1.024	97.3	218.7	83.1	79	85.9	87.2	49.1	99.7	Low	Low	Low	Low	Low	Low	Low	Low
OFAVBQ_DN214646_c2_g1_i4.p1	type:complete	(-),score=75.17,RCC1L_MOUSE	High	36.343 2.07e-81,RCC1|PF00415.18|8.8e-10,RCC1|PF00415.18|1e-05,RCC1|PF00415.18|1.2e-07,RCC1|PF00415.18|0.00096,RCC1|PF00415.18|2.6e-12,RCC1|PF00415.18|1.7e-07,RCC1|PF00415.18|4.8e-15,RCC1_2|PF13540.6|9.2e+03,RCC1_2|PF13540.6|2,RCC1_2|PF13540.6|1.8e-07,RCC1_2|PF13540.6|1.3e-08,RCC1_2|PF13540.6|5.3e-07,RCC1_2|PF13540.6|0.00016,RCC1_2|PF13540.6|0.0004,RCC1_2|PF13540.6|1,DUF4213|PF13938.6|4.9e+03,DUF4…	0.101	0	2	1	1	1	1	410	43.6	7.05	0	1																Low	Not Found	Low	Low	Low	Low	Low	Low
OFAVBQ_DN199434_c1_g2_i1.p1	type:complete	(-),score=23.25,MAP17	High	PF15807.5 0.036 OFAVBQ_DN199434_c1_g2_i1:222-614(-)	0.101	0	5	1	1	1	1	130	13.8	5	0	1	0.01	1.526	1.41	1.181	2.83	3.408	2.87	56.2		85.8	79.3	66.4	159.2	191.6	161.4	Low	Not Found	Low	Low	Low	Low	Low	Low
OFAVBQ_DN218145_c1_g1_i13.p1	type:complete	(-),score=107.71,FCSD2_HUMAN	High	36.650 4.49e-63,SH3_1|PF00018.28|3.6e-10,SH3_9|PF14604.6|2.1e-05,TPR_MLP1_2|PF07926.12|0.0038,TPR_MLP1_2|PF07926.12|1.7e+03,TPR_MLP1_2|PF07926.12|4.9e+03,SH3_2|PF07653.17|0.01,SH3_3|PF08239.11|0.045,tRNA_synthFbeta|PF17759.1|0.14,tRNA_synthFbeta|PF17759.1|3.2e+03,Laminin_II|PF06009.12|0.25,Laminin_II|PF06009.12|7.2e+02,Laminin_II|PF06009.12|6e+02,Exonuc_VII_L|PF02601.15|2.8,Exonuc_VII_L|PF02601.1…	0.101	0	3	2	3	2	1	409	46.3	5.03	0	2																Low	Low	Low	Low	Low	Low	Low	Low
OFAVBQ_DN223953_c1_g1_i1.p1	type:complete	(-),score=614.28,SACS_HUMAN	High	30.901 0.0,SACS_HUMAN|37.163|2.24e-96,SACS_HUMAN|28.670|4.55e-51,SACS_HUMAN|23.835|2.69e-47,SACS_HUMAN|30.822|5.33e-43,SACS_HUMAN|34.298|2.05e-32,SACS_HUMAN|31.928|4.18e-15,HEPN|PF05168.14|1.2e-16,HATPase_c_3|PF13589.6|23,HATPase_c_3|PF13589.6|21,HATPase_c_3|PF13589.6|0.51 OFAVBQ_DN223953_c1_g1_i1:1276-14688(-)	0.101	0	0	2	2	2	1	4470	506.2	6.43	0	2																Low	Not Found	Low	Low	Low	Not Found	Low	Low
OFAVBQ_DN210909_c7_g1_i1.p2	type:5prime_partial	(-),score=20.79,MLRP2_ACRMI	High	30.952 4.31e-16,MLRP2_ACRMI|32.184|3.82e-14,MLRP2_ACRMI|30.811|2.06e-13,MLRP2_ACRMI|32.911|9.53e-12,MLRP2_ACRMI|27.711|1.33e-11,MLRP2_ACRMI|29.870|1.38e-11,MLRP2_ACRMI|27.604|4.64e-11,MLRP2_ACRMI|34.783|1.73e-10,MLRP2_ACRMI|30.556|1.77e-10,MLRP2_ACRMI|28.659|5.34e-10,MLRP2_ACRMI|31.915|6.33e-10,MLRP2_ACRMI|28.846|1.19e-09,MLRP2_ACRMI|29.688|1.34e-09,MLRP2_ACRMI|27.673|1.53e-09,MLRP2_ACRMI|29.167|…	0.101	0	5	1	4	1	1	199	21.5	8.92	0	1																Low	Low	Low	Low	Low	Low	Low	Low
OFAVBQ_DN217054_c2_g1_i1.p1	type:complete	(-),score=53.57,FMO2_MACMU	High	26.966 9.61e-46,FMO-like|PF00743.19|6.8e-55,Pyr_redox_3|PF13738.6|1.2e-16,Pyr_redox_3|PF13738.6|1.4e+03,Pyr_redox_2|PF07992.14|1e-07,Pyr_redox_2|PF07992.14|89,NAD_binding_8|PF13450.6|3.2e-05,NAD_binding_8|PF13450.6|1e+04,K_oxygenase|PF13434.6|8e+02,K_oxygenase|PF13434.6|0.00018,K_oxygenase|PF13434.6|3e+03,HI0933_like|PF03486.14|0.13,HI0933_like|PF03486.14|0.78,Shikimate_DH|PF01488.20|31,Shikimate…	0.102	0	2	1	20	1	1	564	64.8	8.37	0	1																Low	Low	Low	Low	Low	Low	Low	Low
OFAVBQ_DN206219_c0_g5_i2.p1	type:complete	(-),score=74.31,CCDC117	High	PF15810.5 2e+03,CCDC117|PF15810.5|5.3e-08,HPIP|PF15226.6|0.0077 OFAVBQ_DN206219_c0_g5_i2:1323-2513(-)	0.102	0	2	1	2	1	1	396	43.9	4.93	0	1																Low	Low	Low	Low	Low	Low	Low	Low
OFAVBQ_DN221831_c4_g3_i1.p3			High	OFAVBQ_DN221831_c4_g3~~OFAVBQ_DN221831_c4_g3_i1.p3 ORF type:5prime_partial len:126 (-),score=25.41 OFAVBQ_DN221831_c4_g3_i1:2244-2621(-)	0.102	0	10	2	3	2	1	125	14.7	6.28	0	2																Low	Low	Low	Low	Low	Low	Low	Low
OFAVBQ_DN223512_c2_g2_i2.p1	type:complete	(-),score=168.82,CASP_MOUSE	High	53.709 0.0,CASP_C|PF08172.12|1.8e+04,CASP_C|PF08172.12|1.8e+04,CASP_C|PF08172.12|2.1e+03,CASP_C|PF08172.12|3.2e-59,GAS|PF13851.6|9.6e+02,GAS|PF13851.6|0.00084,GAS|PF13851.6|18,GAS|PF13851.6|1.4e+03,GAS|PF13851.6|3.9e+02,GAS|PF13851.6|1.3e+02,GAS|PF13851.6|29,CtIP_N|PF10482.9|1.8e+04,CtIP_N|PF10482.9|1.8e+04,CtIP_N|PF10482.9|4.1e+02,CtIP_N|PF10482.9|4.4e+02,CtIP_N|PF10482.9|2.7e+02,CtIP_N|PF10482.…	0.1	0	1	1	3	1	1	673	76.3	5.47	0	1																Low	Low	Low	Low	Low	Low	Low	Low
OFAVBQ_DN65702_c0_g1_i1.p1	type:internal	(-),score=36.21,TAF11_ARATH	High	42.188 5.69e-10,TAFII28|PF04719.14|7.7e-15 OFAVBQ_DN65702_c0_g1_i1:2-472(-)	0.1	0	5	1	1	1	1	157	17.1	4.96	0	1																Low	Not Found	Low	Low	Low	Low	Low	Low
OFAVBQ_DN138729_c0_g2_i1.p1	type:complete	(+),score=-1.35,PSS	High	PF03034.15 0.071 OFAVBQ_DN138729_c0_g2_i1:348-596(+)	0.089	0	7	1	10	1	1	82	9.5	11.21	0	1																Low	Low	Low	Low	Low	Low	Low	Low
OFAVBQ_DN212726_c2_g1_i3.p1	type:3prime_partial	(-),score=49.83,ZNF91_HUMAN	High	44.937 0.0,ZNF91_HUMAN|43.108|0.0,ZNF91_HUMAN|43.360|0.0,ZNF91_HUMAN|42.876|0.0,zf-H2C2_2|PF13465.6|16,zf-H2C2_2|PF13465.6|1.6e-06,zf-H2C2_2|PF13465.6|0.0002,zf-H2C2_2|PF13465.6|0.00016,zf-H2C2_2|PF13465.6|0.00012,zf-H2C2_2|PF13465.6|6.6e-10,zf-H2C2_2|PF13465.6|1.1e-05,zf-H2C2_2|PF13465.6|3.9e-05,zf-H2C2_2|PF13465.6|5.5e-06,zf-H2C2_2|PF13465.6|5.3e-07,zf-H2C2_2|PF13465.6|2e-06,zf-H2C2_2|PF13465.6…	0.105	0	2	2	3	2	1	779	90.8	9.42	0	2																Low	Low	Low	Low	Low	Low	Low	Low
OFAVBQ_DN203439_c5_g1_i2.p2	type:complete	(-),score=20.48,BABA1_XENLA	High	36.719 7.36e-20 OFAVBQ_DN203439_c5_g1_i2:341-760(-)	0.104	0	5	1	21	1	1	139	16.2	4.84	0	1																Low	Low	Low	Low	Low	Low	Low	Low
OFAVBQ_DN214148_c2_g2_i16.p3	type:5prime_partial	(-),score=14.15,S23A2_RAT	High	38.596 3.81e-06 OFAVBQ_DN214148_c2_g2_i16:1181-1417(-)	0.103	0	12	1	6	1	1	78	9.1	8.18	0	1																Low	Low	Low	Low	Low	Low	Low	Low
OFAVBQ_DN209924_c4_g1_i8.p1	type:internal	(-),score=59.69,PA2_CONGI	High	33.645 1.23e-09,Phospholip_A2_1|PF00068.19|5.2e-16,VWA|PF00092.28|6e-11,Phospholip_A2_2|PF05826.12|4.1,Phospholip_A2_2|PF05826.12|27 OFAVBQ_DN209924_c4_g1_i8:2-1255(-)	0.073	0	2	1	7	1	1	418	47.3	8.59	0	1																Low	Low	Low	Low	Low	Low	Low	Low
OFAVBQ_DN214566_c3_g2_i3.p1	type:complete	(-),score=35.95,RTN1A_XENLA	High	38.378 1.65e-36,Reticulon|PF02453.17|1.4e-36 OFAVBQ_DN214566_c3_g2_i3:2009-2638(-)	0.072	0	5	1	1	1	1	209	23.1	6.35	0	1																Low	Low	Low	Low	Low	Low	Low	Low
OFAVBQ_DN206020_c1_g1_i41.p1			High	OFAVBQ_DN206020_c1_g1~~OFAVBQ_DN206020_c1_g1_i41.p1 ORF type:5prime_partial len:147 (-),score=10.24 OFAVBQ_DN206020_c1_g1_i41:756-1196(-)	0.071	0	8	2	2	2	1	146	16.8	10.32	0	2	0.01	0.757	1.245	1.16	1.427	1.974	2.367	80.6		61	100.3	93.4	115	159.1	190.7	Low	Not Found	Low	Low	Low	Low	Low	Low
OFAVBQ_DN208529_c2_g2_i1.p2			High	OFAVBQ_DN208529_c2_g2~~OFAVBQ_DN208529_c2_g2_i1.p2 ORF type:5prime_partial len:98 (+),score=5.90 OFAVBQ_DN208529_c2_g2_i1:2-295(+)	0.071	0	8	1	9	1	1	97	10.9	9.19	0	1																Low	Low	Low	Low	Low	Low	Low	Low
OFAVBQ_DN225448_c3_g3_i1.p1	type:internal	(-),score=26.09,SACS_MOUSE	High	41.176 1.89e-15,DnaJ|PF00226.31|0.00012,MHB|PF16525.5|1.1e+04,MHB|PF16525.5|0.015,DUF1179|PF06678.11|0.051,Nop52|PF05997.12|0.049,DUF3362|PF11842.8|3.7e+03,DUF3362|PF11842.8|0.043,Prefoldin_2|PF01920.20|0.074,BAR_2|PF10455.9|0.086,OrfB_IS605|PF01385.19|0.12 OFAVBQ_DN225448_c3_g3_i1:2-298(-)	0.071	0	15	1	1	1	1	99	11.3	9.74	0	1																Low	Low	Low	Low	Low	Low	Low	Low
OFAVBQ_DN204603_c3_g4_i2.p1	type:complete	(-),score=103.42,ABCD3_HUMAN	High	69.919 0.0,ABC_membrane_2|PF06472.15|1.4e-91,ABC_tran|PF00005.27|9.5e-17,AAA_23|PF13476.6|2.7e+03,AAA_23|PF13476.6|2.9e+03,AAA_23|PF13476.6|0.016,SMC_N|PF02463.19|0.37,SMC_N|PF02463.19|17,AAA_21|PF13304.6|0.028,AAA_29|PF13555.6|0.13,Rad17|PF03215.15|0.18,AAA_16|PF13191.6|0.48 OFAVBQ_DN204603_c3_g4_i2:1093-3117(-)	0.071	0	6	2	2	2	1	674	76.5	8.9	0	2	1.556	1.053	0.863	1.14	0.488	1.145	0.755	100	155.6	105.3	86.3	114	48.8	114.5	75.5	Low	Low	Low	Low	Low	Low	Low	Low
OFAVBQ_DN140502_c0_g1_i1.p1	type:complete	(-),score=127.88,POLX_TOBAC	High	26.347 6.66e-65,RVT_2|PF07727.14|6.3e-34,rve|PF00665.26|0.17 OFAVBQ_DN140502_c0_g1_i1:165-2804(-)	0.071	0	3	3	5	3	1	879	99.3	7.08	0	3																Low	Low	Low	Low	Low	Low	Low	Low
OFAVBQ_DN130665_c0_g1_i1.p1	type:internal	(-),score=16.77,NEC2_CAEEL	High	93.827 1.10e-47,Peptidase_S8|PF00082.22|8.4e-06 OFAVBQ_DN130665_c0_g1_i1:1-243(-)	0.071	0	26	2	3	2	1	81	8.6	4.49	0	2																Low	Low	Low	Low	Low	Low	Low	Low
OFAVBQ_DN219114_c0_g1_i1.p1	type:complete	(-),score=90.96,UN5BB_XENLA	High	24.936 9.04e-13,ZU5|PF00791.20|1.5e+03,ZU5|PF00791.20|1.1e-18,Death|PF00531.22|1e-10,Sushi|PF00084.20|3e-05,HRM|PF02793.22|0.018,HRM|PF02793.22|8.6e+03,Asp4|PF16996.5|0.22,Asp4|PF16996.5|2.7e+03,Tat|PF00539.18|0.21,EGF_CA|PF07645.15|0.46,EGF_CA|PF07645.15|9.8e+03 OFAVBQ_DN219114_c0_g1_i1:261-2300(-)	0.072	0	3	2	7	2	1	679	76.3	7.43	0	2																Low	Not Found	Low	Low	Low	Low	Low	Low
OFAVBQ_DN220377_c1_g1_i1.p1	type:complete	(+),score=10.30,HTH_Tnp_Tc5	High	PF03221.16 6.8e-05 OFAVBQ_DN220377_c1_g1_i1:3-317(+)	0.071	0	17	3	5	3	1	104	12.1	9.92	0	3																Low	Low	Low	Low	Low	Low	Low	Low
OFAVBQ_DN223778_c3_g3_i1.p1			High	OFAVBQ_DN223778_c3_g3~~OFAVBQ_DN223778_c3_g3_i1.p1 ORF type:internal len:112 (+),score=21.36 OFAVBQ_DN223778_c3_g3_i1:2-334(+)	0.071	0	9	1	1	1	1	111	11.6	10.42	0	1																Low	Not Found	Low	Low	Low	Low	Low	Low
OFAVBQ_DN219216_c3_g6_i1.p1	type:complete	(-),score=287.27,CADN_ACRMI	High	29.771 9.61e-143,CADN_ACRMI|44.444|2.59e-106,CADN_ACRMI|43.571|5.18e-104,CADN_ACRMI|43.541|4.31e-103,CADN_ACRMI|41.818|3.00e-92,CADN_ACRMI|43.466|4.60e-88,CADN_ACRMI|22.575|1.68e-25,CADN_ACRMI|45.528|6.87e-22,CADN_ACRMI|24.409|7.52e-08,VWA|PF00092.28|7.2e-36,VWA|PF00092.28|2.3e-33,VWA|PF00092.28|3.6e-35,VWA|PF00092.28|1.9e-33,VWA|PF00092.28|1.6e-32,VWA|PF00092.28|6.3e-26,TSP_1|PF00090.19|4.3e-10,…	0.071	0	1	2	2	2	1	1894	207.3	7.17	0	2																Low	Low	Low	Low	Low	Low	Low	Low
OFAVBQ_DN195692_c0_g1_i1.p1	type:complete	(-),score=44.85,LLR1_HUMAN	High	40.876 1.12e-95,LRR_8|PF13855.6|7.4e+03,LRR_8|PF13855.6|3.7e-05,LRR_8|PF13855.6|1.4e-10,LRR_8|PF13855.6|0.092,LRR_4|PF12799.7|5.8e+03,LRR_4|PF12799.7|1.2,LRR_4|PF12799.7|0.028,LRR_4|PF12799.7|0.11,LRR_4|PF12799.7|0.41,zf-C6H2|PF15801.5|11,zf-C6H2|PF15801.5|1.2e+02,LRR_1|PF00560.33|1.3e+03,LRR_1|PF00560.33|6.7e+02,LRR_1|PF00560.33|6.6,LRR_1|PF00560.33|1.2e+03,LRR_1|PF00560.33|8.3e+02 OFAVBQ_DN1956…	0.071	0	2	1	4	1	1	421	46.9	9.69	0	1	1.145	0.931	0.887	1.063	0.481	1.179	0.81	106.7	122.2	99.4	94.7	113.5	51.3	125.9	86.4	Low	Low	Low	Low	Low	Low	Low	Low
OFAVBQ_DN214937_c2_g6_i2.p1	type:5prime_partial	(-),score=19.81,USOM5_ACRMI	High	75.000 2.83e-09 OFAVBQ_DN214937_c2_g6_i2:286-600(-)	0.077	0	10	1	2	1	1	104	11.3	9.6	0	1	1.14	0.712	0.869	0.915	0.579	0.933	0.623	118.1	134.7	84.2	102.7	108	68.4	110.2	73.6	Low	Low	Low	Low	Low	Low	Low	Low
OFAVBQ_DN224116_c0_g1_i6.p1	type:5prime_partial	(-),score=22.73,PXDN_XENTR	High	32.143 3.05e-12,PXDN_XENTR|28.571|1.00e-08,PXDN_XENTR|31.092|8.43e-07,Ig_3|PF13927.6|8.6e-05,Ig_3|PF13927.6|2.2e-13,I-set|PF07679.16|3.1e-05,I-set|PF07679.16|2.4e-12,Ig_2|PF13895.6|0.00037,Ig_2|PF13895.6|8.8e-09,ig|PF00047.25|0.06,ig|PF00047.25|3.3e-10,V-set|PF07686.17|0.0027,V-set|PF07686.17|7.5,V-set|PF07686.17|0.27,Ig_6|PF18452.1|0.11,Ig_6|PF18452.1|0.83,Ig_4|PF16680.5|2.6e+02,Ig_4|PF16680.5|0…	0.077	0	3	1	1	1	1	235	26.3	6.29	0	1																Low	Low	Low	Low	Low	Low	Low	Low
OFAVBQ_DN218198_c2_g1_i3.p1	type:internal	(-),score=30.63,COLA1_XENLA	High	49.359 1.74e-21,COLA1_XENLA|43.636|5.94e-19,COLA1_XENLA|39.683|6.92e-13,COLA1_XENLA|37.368|8.72e-11,COLA1_XENLA|42.857|4.83e-10,COLA1_XENLA|41.221|2.93e-09,Collagen|PF01391.18|8.1e-10,Collagen|PF01391.18|3.8e-10,Collagen|PF01391.18|2.7e-08 OFAVBQ_DN218198_c2_g1_i3:3-521(-)	0.077	0	10	2	4	2	1	173	17	10.32	0	2																Low	Low	Low	Low	Low	Low	Low	Low
OFAVBQ_DN216735_c0_g1_i1.p1	type:3prime_partial	(-),score=106.03,CTSRG_MACFA	High	19.067 1.06e-07,CATSPERG|PF15064.6|4.3,CATSPERG|PF15064.6|6.7e-12 OFAVBQ_DN216735_c0_g1_i1:3-2231(-)	0.08	0	1	1	1	1	1	743	82.1	6.71	0	1																Low	Low	Low	Low	Low	Low	Low	Low
OFAVBQ_DN217754_c1_g2_i1.p4			High	OFAVBQ_DN217754_c1_g2~~OFAVBQ_DN217754_c1_g2_i1.p4 ORF type:5prime_partial len:78 (-),score=6.21 OFAVBQ_DN217754_c1_g2_i1:4090-4323(-)	0.084	0	21	1	2	1	1	77	8.8	10.29	0	1																Low	Low	Low	Low	Low	Low	Low	Low
OFAVBQ_DN219700_c0_g1_i11.p1	type:complete	(-),score=34.22,VMP1_DANRE	High	52.632 8.25e-60,SAP|PF02037.27|1.8e-12 OFAVBQ_DN219700_c0_g1_i11:3388-4260(-)	0.071	0	3	1	1	1	1	290	33.3	8.66	0	1																Low	Not Found	Low	Low	Low	Low	Low	Low
OFAVBQ_DN220912_c3_g1_i2.p4	type:complete	(-),score=-1.00,SF1-HH	High	PF16275.5 29,SF1-HH|PF16275.5|11 OFAVBQ_DN220912_c3_g1_i2:405-635(-)	0.084	0	14	1	1	1	1	76	8.4	11.3	0	1																Not Found	Not Found	Low	Low	Not Found	Not Found	Low	Low
OFAVBQ_DN199448_c1_g1_i2.p1	type:complete	(-),score=46.07,NKAP1_HUMAN	High	55.814 6.50e-10,NKAP|PF15692.5|2.3e-14,NKAP|PF15692.5|1.8e+03,NKAP|PF15692.5|1.8e+04,NKAP|PF15692.5|1.1e+04 OFAVBQ_DN199448_c1_g1_i2:801-1496(-)	0.072	0	3	1	4	1	1	231	28	10.1	0	1																Low	Not Found	Low	Low	Low	Low	Low	Low
OFAVBQ_DN218157_c1_g1_i2.p1	type:complete	(-),score=86.96,CARD	High	PF00619.21 3e-08,CARD|PF00619.21|3.5e+03,HEPN_DZIP3|PF18738.1|0.0055,PcfK|PF14058.6|6e+02,PcfK|PF14058.6|0.074 OFAVBQ_DN218157_c1_g1_i2:1214-2959(-)	0.072	0	7	2	2	2	1	581	68	9	0	2																Low	Not Found	Low	Low	Low	Low	Low	Low
OFAVBQ_DN224233_c0_g2_i1.p2	type:complete	(-),score=19.29,DUF5641	High	PF18701.1 3.6e-28 OFAVBQ_DN224233_c0_g2_i1:145-618(-)	0.07	0	4	1	1	1	1	157	18.1	8.19	0	1																Low	Low	Low	Low	Low	Low	Low	Low
OFAVBQ_DN220145_c0_g2_i2.p1	type:complete	(-),score=188.02,ACLY_HUMAN	High	68.822 0.0,Citrate_bind|PF16114.5|1.8e-93,Ligase_CoA|PF00549.19|4e-16,CoA_binding|PF02629.19|1.4e-11,ATP-grasp_2|PF08442.10|3.4e-11,ATP-grasp_2|PF08442.10|3.9e+03,Succ_CoA_lig|PF13607.6|9.9e+02,Succ_CoA_lig|PF13607.6|1.6e-05,ATP-grasp_5|PF13549.6|0.012,HI0933_like|PF03486.14|1.2e+03,HI0933_like|PF03486.14|0.31 OFAVBQ_DN220145_c0_g2_i2:2312-4897(-)	0.069	0	1	1	1	1	1	861	94.7	6.84	0	1	1.895	0.9	0.831	1.512	0.901	1.37	0.498	89.8	170.2	80.8	74.7	135.8	80.9	123.1	44.7	Low	Low	Low	Low	Low	Low	Low	Low
OFAVBQ_DN225002_c3_g1_i1.p1	type:complete	(-),score=418.76,PPHLN_MOUSE	High	39.286 2.35e-09,Lge1|PF11488.8|0.0023,RRM_1|PF00076.22|0.052,RRM_1|PF00076.22|2.4e+03 OFAVBQ_DN225002_c3_g1_i1:288-7277(-)	0.07	0	1	2	2	2	1	2329	261.9	5.62	0	2																Low	Low	Low	Low	Low	Low	Low	Low
OFAVBQ_DN202950_c5_g2_i4.p1	type:5prime_partial	(-),score=150.21,DPOD3_MOUSE	High	32.523 6.34e-60,CDC27|PF09507.10|6.4e-52,CDC27|PF09507.10|6.5e-23 OFAVBQ_DN202950_c5_g2_i4:1265-2830(-)	0.069	0	4	2	2	2	1	521	58.1	9.1	0	2	1.073	0.586	0.484	1.925	0.773	1.055	0.314	111	119.1	65.1	53.7	213.6	85.8	117.1	34.8	Low	Low	Low	Low	Low	Low	Low	Low
OFAVBQ_DN213300_c0_g2_i3.p4			High	OFAVBQ_DN213300_c0_g2~~OFAVBQ_DN213300_c0_g2_i3.p4 ORF type:complete len:71 (+),score=2.65 OFAVBQ_DN213300_c0_g2_i3:2979-3191(+)	0.069	0	9	1	6	1	1	70	8.4	9.89	0	1																Low	Low	Low	Low	Low	Low	Low	Low
OFAVBQ_DN169832_c0_g1_i1.p1	type:complete	(-),score=37.41,RL19_DROME	High	79.208 3.33e-107,Ribosomal_L19e|PF01280.20|2.9e-66,Ribosomal_L19e|PF01280.20|2.2e+03,SpoU_sub_bind|PF08032.12|6.7e+02,SpoU_sub_bind|PF08032.12|0.64 OFAVBQ_DN169832_c0_g1_i1:96-704(-)	0.069	0	3	1	2	1	1	202	23.8	11.06	0	1																Low	Not Found	Low	Low	Low	Not Found	Low	Low
OFAVBQ_DN219091_c0_g2_i1.p1	type:complete	(-),score=158.75,MCCA_HUMAN	High	61.782 0.0,CPSase_L_D2|PF02786.17|9.1e-76,Biotin_carb_N|PF00289.22|1.9e-45,Biotin_carb_N|PF00289.22|22,Biotin_carb_C|PF02785.19|1.3e-34,Biotin_lipoyl|PF00364.22|8.4e+02,Biotin_lipoyl|PF00364.22|9.5e-17,Dala_Dala_lig_C|PF07478.13|5.3e-13,ATP-grasp|PF02222.22|2.5e+03,ATP-grasp|PF02222.22|1.2e-12,ATP-grasp_3|PF02655.14|1.1e-05,ATP-grasp_3|PF02655.14|4.3e+03,Biotin_lipoyl_2|PF13533.6|1.1e+04,Biotin_l…	0.069	0	3	2	5	2	1	625	69.6	5.38	0	2																Low	Low	Low	Low	Low	Low	Low	Low
OFAVBQ_DN219991_c5_g4_i2.p2	type:complete	(+),score=14.89,Myb_DNA-bind_5	High	PF13873.6 1.1e-14,MADF_DNA_bdg|PF10545.9|0.1 OFAVBQ_DN219991_c5_g4_i2:419-700(+)	0.069	0	6	1	2	1	1	93	10.9	9.52	0	1																Low	Not Found	Low	Low	Low	Low	Low	Low
OFAVBQ_DN214215_c1_g1_i9.p1	type:complete	(-),score=96.29,COPD_BOVIN	High	68.496 0.0,Adap_comp_sub|PF00928.21|4.5e-20,Clat_adaptor_s|PF01217.20|3.7e-07 OFAVBQ_DN214215_c1_g1_i9:2428-3672(-)	0.072	0	8	5	7	5	1	414	45.9	7.36	0	5	1.574	0.732	1.09	0.889	1.259	1.064	1.192	90.9	143.1	66.5	99.1	80.8	114.5	96.7	108.4	Low	Low	Low	Low	Low	Low	Low	Low
OFAVBQ_DN224439_c1_g2_i1.p1	type:complete	(-),score=308.39,ESPL1_HUMAN	High	35.639 3.27e-92,Peptidase_C50|PF03568.17|5.7e+03,Peptidase_C50|PF03568.17|1.4e-99,CHAT|PF12770.7|8.5e-05,TPR_MalT|PF17874.1|0.0055,TPR_MalT|PF17874.1|6.8e+02,TPR_MalT|PF17874.1|3.4e+03,Sec2p|PF06428.11|17,Sec2p|PF06428.11|3.7,TPR_12|PF13424.6|1e+03,TPR_12|PF13424.6|0.53,TPR_12|PF13424.6|5e+03,TPR_12|PF13424.6|61,TPR_2|PF07719.17|6.7e+02,TPR_2|PF07719.17|3.4e+02,TPR_2|PF07719.17|1.6e+03,TPR_2|PF07…	0.069	0	1	2	2	2	1	1271	141.1	7.08	0	2																Low	Low	Low	Low	Low	Low	Low	Low
OFAVBQ_DN188968_c0_g1_i1.p1	type:3prime_partial	(-),score=121.43,B4GN4_MOUSE	High	35.115 5.41e-10,AbfB|PF05270.13|1.3e-06,PA14|PF07691.12|2.2e-05,GLEYA|PF10528.9|0.0058,GLEYA|PF10528.9|1.4e+03,IL1|PF00340.19|51,IL1|PF00340.19|9.6,IL1|PF00340.19|1.8e+03 OFAVBQ_DN188968_c0_g1_i1:2-2428(-)	0.069	0	2	2	7	2	1	809	89.1	9.19	3.32	2	1.544	0.655	1.02	1.008	0.867	0.736	0.617	107.4	165.9	70.3	109.6	108.3	93.2	79.1	66.3	Low	Low	Low	Low	Low	Low	Low	Low
OFAVBQ_DN201416_c2_g6_i1.p1	type:5prime_partial	(-),score=-2.33,HYR	High	PF02494.16 2.3e-05 OFAVBQ_DN201416_c2_g6_i1:286-498(-)	0.069	0	9	1	5	1	1	70	7.8	10.01	0	1																Low	Low	Low	Low	Low	Low	Low	Low
OFAVBQ_DN218945_c2_g2_i1.p1	type:complete	(-),score=95.62,TIGD6_HUMAN	High	34.608 1.58e-94,DDE_1|PF03184.19|4.5e-48,HTH_Tnp_Tc5|PF03221.16|5.7e-16,HTH_Tnp_Tc5|PF03221.16|8.1e+03,CENP-B_N|PF04218.13|3.1e-07,CENP-B_N|PF04218.13|7.3e+02,TBPIP|PF07106.13|0.042,GAD-like|PF08887.11|0.19 OFAVBQ_DN218945_c2_g2_i1:955-2637(-)	0.069	0	2	1	1	1	1	560	63.5	6.93	0	1																Low	Not Found	Low	Low	Low	Low	Low	Low
OFAVBQ_DN210725_c0_g4_i1.p1	type:internal	(-),score=13.15,RET_HUMAN	High	46.078 1.61e-22,Pkinase_Tyr|PF07714.17|1.9e-26,Pkinase|PF00069.25|1.7e-12 OFAVBQ_DN210725_c0_g4_i1:2-289(-)	0.069	0	7	1	2	1	1	96	11	8.72	0	1																Low	Not Found	Low	Low	Low	Low	Low	Low
OFAVBQ_DN203686_c0_g1_i4.p1	type:3prime_partial	(-),score=28.87,UD2A1_MOUSE	High	31.662 8.57e-57,UDPGT|PF00201.18|5.2e-66,Glyco_tran_28_C|PF04101.16|0.0064,Glyco_transf_4|PF13439.6|0.051 OFAVBQ_DN203686_c0_g1_i4:1-1203(-)	0.071	0	2	1	1	1	1	401	45.4	6.76	0	1																Low	Low	Low	Low	Low	Low	Low	Low
OFAVBQ_DN213903_c1_g1_i1.p1	type:5prime_partial	(+),score=49.72,SmpA_OmlA	High	PF04355.13 7.1e+02,SmpA_OmlA|PF04355.13|1.3 OFAVBQ_DN213903_c1_g1_i1:3-1355(+)	0.072	0	1	1	7	1	1	450	50.6	7.21	0	1																Low	Low	Low	Low	Low	Low	Low	Low
OFAVBQ_DN211517_c4_g1_i4.p1	type:complete	(-),score=57.23,SCMC2_HUMAN	High	60.858 1.99e-172,Mito_carr|PF00153.27|8.8e-23,Mito_carr|PF00153.27|2.6e-22,Mito_carr|PF00153.27|2.9e-21,EF-hand_7|PF13499.6|0.00048,EF-hand_8|PF13833.6|0.025 OFAVBQ_DN211517_c4_g1_i4:1825-2964(-)	0.072	0	3	1	3	1	1	379	42	9.33	0	1																Low	Low	Low	Low	Low	Low	Low	Low
OFAVBQ_DN215357_c2_g2_i2.p1	type:complete	(-),score=57.46,DUF5641	High	PF18701.1 1.1e-30,Integrase_H2C2|PF17921.1|2e-05 OFAVBQ_DN215357_c2_g2_i2:300-1901(-)	0.072	0	1	1	1	1	1	533	61	9.92	0	1																Low	Low	Low	Low	Low	Low	Low	Low
OFAVBQ_DN199667_c5_g1_i1.p1			High	OFAVBQ_DN199667_c5_g1~~OFAVBQ_DN199667_c5_g1_i1.p1 ORF type:3prime_partial len:154 (+),score=20.09 OFAVBQ_DN199667_c5_g1_i1:196-654(+)	0.069	0	6	2	2	2	1	153	17.1	7.72	0	2																Low	Low	Low	Low	Low	Low	Low	Low
OFAVBQ_DN206009_c0_g1_i1.p1	type:complete	(-),score=191.23,MCM3_MOUSE	High	65.780 0.0,MCM|PF00493.23|1.1e-95,MCM_OB|PF17207.3|3e-34,MCM_lid|PF17855.1|4.7e+03,MCM_lid|PF17855.1|5.3e-24,MCM_N|PF14551.6|2.2e-10,MCM_N|PF14551.6|2.2e+03,Mg_chelatase|PF01078.21|8.8e+02,Mg_chelatase|PF01078.21|6.7e-07,AAA_5|PF07728.14|2e+03,AAA_5|PF07728.14|0.02,AAA_3|PF07726.11|0.02,FAM219A|PF15260.6|1.3e+03,FAM219A|PF15260.6|4.1e+03,FAM219A|PF15260.6|0.026,Sigma54_activat|PF00158.26|3.2e+03,…	0.084	0	1	1	1	1	1	828	93.1	6.43	0	1	0.951	0.892	0.926	0.866	0.572	0.595	0.689	123.3	117.2	110	114.1	106.8	70.5	73.4	84.9	Low	Low	Low	Low	Low	Low	Low	Low
OFAVBQ_DN221890_c4_g1_i3.p2			High	OFAVBQ_DN221890_c4_g1~~OFAVBQ_DN221890_c4_g1_i3.p2 ORF type:complete len:78 (+),score=6.23 OFAVBQ_DN221890_c4_g1_i3:853-1086(+)	0.084	0	19	2	2	2	1	77	8.6	9.79	0	2																Low	Not Found	Low	Low	Low	Low	Low	Low
OFAVBQ_DN194156_c0_g1_i1.p1	type:complete	(-),score=27.85,LYL1_RAT	High	77.419 4.87e-28,HLH|PF00010.26|1.1e-14,DUF5339|PF17274.2|9.3e+03,DUF5339|PF17274.2|0.053 OFAVBQ_DN194156_c0_g1_i1:412-960(-)	0.084	0	4	1	2	1	1	182	20.8	6.87	0	1																Low	Low	Low	Low	Low	Low	Low	Low
OFAVBQ_DN220279_c0_g1_i1.p1	type:complete	(-),score=3.08,POL_SFV1	High	24.907 2.51e-07,RVT_1|PF00078.27|9.3e-05,RT_RNaseH|PF17917.1|0.41 OFAVBQ_DN220279_c0_g1_i1:637-2379(-)	0.087	0	1	1	1	1	1	580	65.3	9.77	0	1																Low	Low	Low	Low	Low	Low	Low	Low
OFAVBQ_DN201306_c4_g1_i6.p1	type:complete	(-),score=-7.16,zf-LITAF-like	High	PF10601.9 0.069,zf-LITAF-like|PF10601.9|7.9e+03 OFAVBQ_DN201306_c4_g1_i6:19-285(-)	0.088	0	9	1	2	1	1	88	9.8	10.49	0	1																Low	Low	Low	Low	Low	Low	Low	Low
OFAVBQ_DN192118_c0_g1_i1.p1	type:complete	(-),score=35.29,MYPT1_HUMAN	High	34.615 5.51e-12,MYPT1_HUMAN|39.130|3.65e-07,Ank_4|PF13637.6|0.0012,Ank_4|PF13637.6|8.3e-07,Ank_4|PF13637.6|0.045,Ank_2|PF12796.7|3.7e-13,Ank_5|PF13857.6|7.3e-08,Ank_5|PF13857.6|0.0014,Ank_3|PF13606.6|1.9e+02,Ank_3|PF13606.6|0.059,Ank_3|PF13606.6|0.021,Ank|PF00023.30|1.2e+03,Ank|PF00023.30|0.19,Ank|PF00023.30|0.23,CCDC168_N|PF15804.5|0.048 OFAVBQ_DN192118_c0_g1_i1:409-1047(-)	0.088	0	3	1	1	1	1	212	23.5	5.78	0	1																Low	Low	Low	Low	Low	Low	Low	Low
OFAVBQ_DN220816_c0_g2_i2.p1	type:complete	(-),score=18.98,ETV6_MOUSE	High	44.615 6.96e-14,SAM_PNT|PF02198.16|1.9e-19,DNA_meth_N|PF18284.1|0.0021 OFAVBQ_DN220816_c0_g2_i2:1156-1545(-)	0.087	0	7	1	1	1	1	129	15.1	8.94	0	1																Low	Not Found	Low	Low	Low	Low	Low	Low
OFAVBQ_DN188075_c0_g1_i2.p1	type:complete	(+),score=30.17,P52K_HUMAN	High	37.209 2.83e-26,DUF4371|PF14291.6|1.8e-24,Lin-8|PF03353.15|0.21 OFAVBQ_DN188075_c0_g1_i2:456-1193(+)	0.086	0	2	1	3	1	1	245	27.4	7.78	0	1																Low	Not Found	Low	Low	Low	Low	Low	Low
OFAVBQ_DN202947_c0_g1_i1.p1	type:complete	(-),score=42.08,Polysacc_deac_1	High	PF01522.21 9.6e-06 OFAVBQ_DN202947_c0_g1_i1:375-1526(-)	0.086	0	3	1	1	1	1	383	43.5	4.84	0	1	1.832	1.225	1.134	1.18	0.739	1.083	0.61	90.9	166.4	111.3	103.1	107.2	67.2	98.5	55.5	Low	Low	Low	Low	Low	Low	Low	Low
OFAVBQ_DN217211_c1_g1_i11.p1	type:complete	(-),score=74.28,SCNNA_BOVIN	High	26.916 2.57e-49,ASC|PF00858.24|7.7e-24,ASC|PF00858.24|6.9e-72,DUF1653|PF07866.11|0.14 OFAVBQ_DN217211_c1_g1_i11:1386-3122(-)	0.085	0	2	1	2	1	1	578	65.3	8.06	0	1	1.468	1.486	1.3	1.482	2.134	1.801	2.48	60.8	89.3	90.4	79.1	90.2	129.8	109.6	150.8	Low	Low	Low	Low	Low	Low	Low	Low
OFAVBQ_DN220745_c1_g1_i5.p2			High	OFAVBQ_DN220745_c1_g1~~OFAVBQ_DN220745_c1_g1_i5.p2 ORF type:complete len:94 (+),score=2.60 OFAVBQ_DN220745_c1_g1_i5:1425-1706(+)	0.085	0	14	1	1	1	1	93	10.7	9.77	0	1																Low	Not Found	Low	Low	Low	Low	Low	Low
OFAVBQ_DN219373_c0_g1_i4.p1	type:5prime_partial	(-),score=64.93,TRIM2_BOVIN	High	26.932 7.12e-38,NHL|PF01436.21|1.8e+04,NHL|PF01436.21|0.54,NHL|PF01436.21|79,NHL|PF01436.21|0.00068,NHL|PF01436.21|1.4e+03,NHL|PF01436.21|0.00014,NHL|PF01436.21|0.0011,Filamin|PF00630.19|1.9e-15,Filamin|PF00630.19|5e+03,DUF5128|PF17170.4|3e+02,DUF5128|PF17170.4|3.7e+02,DUF5128|PF17170.4|2.4e-05,Invasin_D3|PF09134.10|0.00043,Invasin_D3|PF09134.10|1.7e+04,DUF4934|PF16288.5|1.6e+03,DUF4934|PF16288.5…	0.087	0	2	1	1	1	1	427	47.3	6.21	0	1																Low	Low	Low	Low	Low	Low	Low	Low
OFAVBQ_DN219716_c0_g1_i6.p1	type:complete	(-),score=45.90,HS12B_HUMAN	High	32.095 5.34e-44,DUF1364|PF07102.12|0.094,GGACT|PF06094.12|0.28 OFAVBQ_DN219716_c0_g1_i6:321-1205(-)	0.085	0	3	1	1	1	1	294	32.8	7.78	0	1																Low	Low	Low	Low	Low	Low	Low	Low
OFAVBQ_DN197210_c7_g1_i1.p1			High	OFAVBQ_DN197210_c7_g1~~OFAVBQ_DN197210_c7_g1_i1.p1 ORF type:complete len:89 (+),score=0.39 OFAVBQ_DN197210_c7_g1_i1:72-338(+)	0.086	0	8	1	1	1	1	88	10	7.24	0	1																Low	Not Found	Low	Low	Low	Low	Low	Low
OFAVBQ_DN204511_c0_g1_i3.p1	type:complete	(-),score=83.47,AGRD1_BOVIN	High	26.941 1.68e-48,7tm_2|PF00002.24|6.1e-47,GPS|PF01825.21|1.8e-11,I-set|PF07679.16|4.9e-06,Ig_3|PF13927.6|0.0001,Ig_3|PF13927.6|1.8e+04,V-set|PF07686.17|42,V-set|PF07686.17|0.03,V-set|PF07686.17|6.3e+03,ig|PF00047.25|0.0095,ig|PF00047.25|5.6e+03,Chloroplast_duf|PF14476.6|10,Chloroplast_duf|PF14476.6|1.5e+02 OFAVBQ_DN204511_c0_g1_i3:542-3277(-)	0.086	0	1	1	1	1	1	911	100	9.07	0	1																Low	Low	Low	Low	Low	Low	Low	Low
OFAVBQ_DN203708_c0_g1_i1.p1	type:complete	(-),score=19.45,NPFF2_RAT	High	27.551 1.47e-26,7tm_1|PF00001.21|2.5e-40,7TM_GPCR_Srh|PF10318.9|0.071,7TM_GPCR_Srh|PF10318.9|3.9e+02,Synaptobrevin|PF00957.21|3.1e+02,Synaptobrevin|PF00957.21|7.8e+03,Synaptobrevin|PF00957.21|6.9 OFAVBQ_DN203708_c0_g1_i1:395-1309(-)	0.086	0	9	1	4	1	1	304	34.7	9.2	0	1																Low	Low	Low	Low	Low	Low	Low	Low
OFAVBQ_DN247689_c0_g1_i1.p1			High	OFAVBQ_DN247689_c0_g1~~OFAVBQ_DN247689_c0_g1_i1.p1 ORF type:internal len:76 (+),score=14.08 OFAVBQ_DN247689_c0_g1_i1:2-226(+)	0.084	0	15	1	1	1	1	75	8.2	5.41	0	1																Low	Low	Low	Low	Low	Low	Low	Low
OFAVBQ_DN216383_c4_g1_i1.p1	type:internal	(+),score=25.35,NS1BP_HUMAN	High	33.945 2.77e-11,NS1BP_HUMAN|33.673|1.11e-06,NS1BP_HUMAN|29.752|2.24e-06,Kelch_6|PF13964.6|7.1,Kelch_6|PF13964.6|6.3e-07,Kelch_6|PF13964.6|4.5e-07,Kelch_1|PF01344.25|4.2e+03,Kelch_1|PF01344.25|4.6e-09,Kelch_1|PF01344.25|9.4e-08,Kelch_4|PF13418.6|48,Kelch_4|PF13418.6|0.013,Kelch_4|PF13418.6|4.7e-07,Kelch_4|PF13418.6|3.1e+03,Kelch_3|PF13415.6|3e+03,Kelch_3|PF13415.6|0.027,Kelch_3|PF13415.6|0.0046,Ke…	0.082	0	9	1	1	1	1	149	17	8.78	0	1																Low	Not Found	Low	Low	Low	Low	Low	Low
OFAVBQ_DN224587_c3_g2_i3.p1	type:complete	(-),score=261.58,BRCA2_FELCA	High	38.017 5.11e-164,BRCA2_FELCA|35.514|3.44e-06,BRCA-2_helical|PF09169.10|3e-53,BRCA-2_OB1|PF09103.10|1.4e-40,BRCA2|PF00634.18|11,BRCA2|PF00634.18|9.1e-06,BRCA2|PF00634.18|4.1e-05,BRCA2|PF00634.18|2.9e-07,BRCA2|PF00634.18|1.6e-07,BRCA-2_OB3|PF09104.10|1.5e-30,Tower|PF09121.10|1.8e-14,REPA_OB_2|PF16900.5|9.6e+03,REPA_OB_2|PF16900.5|7.6e+02,REPA_OB_2|PF16900.5|0.25 OFAVBQ_DN224587_c3_g2_i3:587-4219(-)	0.082	0	2	3	7	3	1	1210	134.2	8	0	3																Low	Not Found	Low	Low	Low	Low	Low	Low
OFAVBQ_DN218162_c1_g2_i7.p1	type:complete	(-),score=219.96,TOB1A_XENLA	High	32.900 2.74e-136,BRCT|PF00533.26|3e-11,BRCT|PF00533.26|7.5e+03,BRCT|PF00533.26|1.3e-09,BRCT|PF00533.26|8.3e-09,BRCT|PF00533.26|4.6e+02,PTCB-BRCT|PF12738.7|1e-12,PTCB-BRCT|PF12738.7|1.5e-05,PTCB-BRCT|PF12738.7|0.048,BRCT_2|PF16589.5|4.5e+02,BRCT_2|PF16589.5|0.02,BRCT_2|PF16589.5|0.071,BRCT_2|PF16589.5|0.078,BRCT_2|PF16589.5|5.2e+03,RTT107_BRCT_5|PF16770.5|1.2e+04,RTT107_BRCT_5|PF16770.5|2.8e+03,RT…	0.082	0	3	1	1	1	1	975	108.6	6.61	0	1																Low	Not Found	Low	Low	Low	Low	Low	Low
OFAVBQ_DN219312_c0_g1_i7.p1	type:complete	(-),score=213.73,LMBL1_CHICK	High	37.412 5.11e-155,MBT|PF02820.18|1.1e-26,MBT|PF02820.18|1.2e-31,MBT|PF02820.18|3.4e-22,zf-C2HC|PF01530.18|1.4e+04,zf-C2HC|PF01530.18|1.5e-13,zf-C2HC|PF01530.18|1.6e-11,SAM_1|PF00536.30|3.4e-11,SAM_2|PF07647.17|7.3e-06 OFAVBQ_DN219312_c0_g1_i7:1576-4497(-)	0.079	0	5	4	6	4	1	973	107.8	7.81	0	4																Low	Low	Low	Low	Low	Low	Low	Low
OFAVBQ_DN212584_c1_g1_i1.p1	type:complete	(-),score=99.29,ATLA1_BOVIN	High	59.160 0.0,GBP|PF02263.19|1.2e-96,GBP_C|PF02841.14|0.00034,Tiam_CC_Ex|PF18385.1|8.8e+03,Tiam_CC_Ex|PF18385.1|0.01 OFAVBQ_DN212584_c1_g1_i1:524-2119(-)	0.086	0	1	1	2	1	1	531	59.8	5.76	0	1																Low	Low	Low	Low	Low	Low	Low	Low
OFAVBQ_DN188204_c0_g1_i1.p1	type:internal	(-),score=26.51,SPTN1_HUMAN	High	37.594 7.65e-20,SPTN1_HUMAN|33.088|5.26e-17,Spectrin|PF00435.21|7.7e-14,Spectrin|PF00435.21|3.4e+02,ABATE|PF07336.11|26,ABATE|PF07336.11|4.2,HrpB7|PF09486.10|0.034,Med28|PF11594.8|0.03,DUF3381|PF11861.8|0.42,DUF3381|PF11861.8|62,Med30|PF11315.8|7.3,Med30|PF11315.8|12,Snapin_Pallidin|PF14712.6|0.26,Snapin_Pallidin|PF14712.6|0.37,Seryl_tRNA_N|PF02403.22|0.76,Seryl_tRNA_N|PF02403.22|0.33,Shugoshin_N…	0.087	0	6	1	1	1	1	132	15.3	5.03	0	1																Low	Low	Low	Low	Low	Low	Low	Low
OFAVBQ_DN206214_c1_g1_i4.p1	type:5prime_partial	(-),score=42.72,RBP_CHICK	High	36.620 3.86e-43,Folate_rec|PF03024.14|8.7e-44 OFAVBQ_DN206214_c1_g1_i4:898-1776(-)	0.169	0	3	1	4	1	1	292	32.4	6.96	0	1																Low	Low	Low	Low	Low	Low	Low	Low
OFAVBQ_DN144346_c0_g2_i1.p1	type:5prime_partial	(+),score=-6.26,7tm_1	High	PF00001.21 0.00038,7tm_4|PF13853.6|0.048 OFAVBQ_DN144346_c0_g2_i1:2-271(+)	0.087	0	10	1	1	1	1	89	10.4	10.17	0	1																Low	Not Found	Low	Low	Low	Low	Low	Low
OFAVBQ_DN214604_c0_g1_i5.p1	type:complete	(-),score=207.84,SCYL1_XENTR	High	44.714 0.0,Pkinase|PF00069.25|4.3e-11,Pkinase_Tyr|PF07714.17|2.2e-09,HEAT|PF02985.22|6.3e+02,HEAT|PF02985.22|1.8e+03,HEAT|PF02985.22|20,HEAT|PF02985.22|28,HEAT|PF02985.22|1.2,Cnd1|PF12717.7|4e+03,Cnd1|PF12717.7|3.4e+02,Cnd1|PF12717.7|0.18 OFAVBQ_DN214604_c0_g1_i5:837-3566(-)	0.085	0	1	1	1	1	1	909	99.6	6.29	0	1																Not Found	Not Found	Not Found	Low	Low	Not Found	Not Found	Low
OFAVBQ_DN211691_c3_g4_i1.p5			High	OFAVBQ_DN211691_c3_g4~~OFAVBQ_DN211691_c3_g4_i1.p5 ORF type:complete len:76 (+),score=3.58 OFAVBQ_DN211691_c3_g4_i1:2655-2882(+)	0.085	0	13	1	3	1	1	75	8.3	10.13	0	1																Low	Low	Low	Low	Low	Low	Low	Low
OFAVBQ_DN213073_c0_g1_i1.p1	type:complete	(-),score=88.75,BUD22_SCHPO	High	24.552 4.75e-12,BUD22|PF09073.10|8e-15 OFAVBQ_DN213073_c0_g1_i1:727-1833(-)	0.085	0	4	2	20	2	1	368	42.4	9.72	0	2																Low	Low	Low	Low	Low	Low	Low	Low
OFAVBQ_DN210658_c1_g1_i4.p1	type:complete	(-),score=51.78,TM145_XENLA	High	49.286 4.95e-135,GpcrRhopsn4|PF10192.9|1.6e-69,GWT1|PF06423.12|0.18,GWT1|PF06423.12|3.9e+02 OFAVBQ_DN210658_c1_g1_i4:1046-2506(-)	0.084	0	1	1	1	1	1	486	56.3	8.69	0	1																Low	Not Found	Low	Low	Low	Low	Low	Low
OFAVBQ_DN216275_c0_g1_i8.p3	type:complete	(-),score=63.38,DD3_DICDI	High	39.948 6.33e-80 OFAVBQ_DN216275_c0_g1_i8:4836-5972(-)	0.082	0	3	1	1	1	1	378	44.2	7.88	0	1																Low	Not Found	Low	Low	Low	Low	Low	Low
OFAVBQ_DN219400_c0_g1_i3.p1	type:complete	(-),score=146.40,LMNA_CHICK	High	25.174 1.95e-45,Filament|PF00038.21|9.4e-33,LTD|PF00932.19|2.4e-11,Spc7|PF08317.11|18,Spc7|PF08317.11|20,Spc7|PF08317.11|0.014 OFAVBQ_DN219400_c0_g1_i3:1613-3892(-)	0.082	0	1	1	1	1	1	759	84.7	8.68	0	1																Low	Low	Low	Low	Low	Low	Low	Low
OFAVBQ_DN199724_c0_g1_i2.p1	type:complete	(-),score=58.92,ANPRB_BOVIN	High	59.910 8.00e-79,Guanylate_cyc|PF00211.20|1.6e-64,NIT|PF08376.10|9e-22,HNOBA|PF07701.14|3.5e+03,HNOBA|PF07701.14|2.6e-06 OFAVBQ_DN199724_c0_g1_i2:1391-3175(-)	0.083	0	2	1	1	1	1	594	67.3	6.13	0	1																Not Found	Not Found	Not Found	Not Found	Not Found	Not Found	Not Found	Not Found
OFAVBQ_DN206159_c0_g1_i4.p3	type:5prime_partial	(-),score=10.08,UBP12_BOVIN	High	79.167 8.41e-36,UCH|PF00443.29|1.7e-12,UCH_1|PF13423.6|1.1e-05 OFAVBQ_DN206159_c0_g1_i4:2976-3269(-)	0.083	0	7	1	4	1	1	97	11	10.01	0	1																Low	Low	Low	Low	Low	Low	Low	Low
OFAVBQ_DN223656_c0_g1_i1.p1	type:3prime_partial	(-),score=30.66,MAS20	High	PF02064.15 0.43 OFAVBQ_DN223656_c0_g1_i1:3-368(-)	0.083	0	5	1	1	1	1	122	14.2	9.66	0	1																Not Found	Not Found	Low	Low	Low	Low	Low	Low
OFAVBQ_DN216268_c1_g2_i4.p1	type:3prime_partial	(-),score=169.58,NPAS2_HUMAN	High	36.387 1.16e-65,PAS_11|PF14598.6|0.012,PAS_11|PF14598.6|1.1e-16,PAS_11|PF14598.6|7.8e+03,PAS_3|PF08447.12|8.3e-06,PAS_3|PF08447.12|1e-10,PAS_3|PF08447.12|4.5e+03,PAS|PF00989.25|1.1e-08,PAS|PF00989.25|0.006,HLH|PF00010.26|4.7e-11,PAS_9|PF13426.7|5.2e-07,PAS_9|PF13426.7|3.2e+02,PAS_9|PF13426.7|1.2e+04,PAS_4|PF08448.10|4.3e-05,PAS_4|PF08448.10|1.8e+03,PAS_4|PF08448.10|1.3e+04 OFAVBQ_DN216268_c1_g2_i…	0.083	0	2	1	1	1	1	774	86.9	5.31	0	1																Low	Not Found	Low	Low	Low	Low	Low	Low
OFAVBQ_DN220735_c0_g1_i3.p1	type:complete	(-),score=370.11,APBA1_HUMAN	High	55.303 1.70e-145,PID|PF00640.23|3.6e-34,PDZ|PF00595.24|6e-12,PDZ|PF00595.24|1.3e-10,PDZ_6|PF17820.1|2.5e-06,PDZ_6|PF17820.1|1.7e-08,PDZ_2|PF13180.6|0.0013,PDZ_2|PF13180.6|71,DUF2946|PF11162.8|3.2,DUF2946|PF11162.8|68 OFAVBQ_DN220735_c0_g1_i3:399-4685(-)	0.083	0	2	3	4	3	1	1428	156.6	5.33	0	3	1.433	1.447	0.461	0.776	0.893	0.328	0.827	111.6	160	161.5	51.5	86.6	99.7	36.7	92.3	Low	Low	Low	Low	Low	Low	Low	Low
OFAVBQ_DN217194_c0_g1_i5.p1	type:complete	(-),score=75.72,HMCN1_HUMAN	High	48.837 5.52e-99,HMCN1_HUMAN|40.148|5.77e-93,HMCN1_HUMAN|44.412|5.13e-87,HMCN1_HUMAN|44.412|1.28e-82,HMCN1_HUMAN|45.349|2.05e-81,HMCN1_HUMAN|39.607|4.94e-69,HMCN1_HUMAN|42.606|1.10e-63,HMCN1_HUMAN|37.746|5.47e-51,TSP_1|PF00090.19|0.0003,TSP_1|PF00090.19|4e-10,TSP_1|PF00090.19|1.3e-07,TSP_1|PF00090.19|5e-13,TSP_1|PF00090.19|1.1e-11,TSP_1|PF00090.19|3.2e-09,TSP_1|PF00090.19|1.2e-10,TSP_1|PF00090.19|…	0.083	0	1	1	1	1	1	862	92.9	9.22	0	1																Low	Low	Low	Low	Low	Low	Low	Low
OFAVBQ_DN221342_c0_g1_i1.p1	type:complete	(-),score=249.70,ANKAR_MOUSE	High	41.290 0.0,Arm|PF00514.23|1.3e+03,Arm|PF00514.23|0.0094,Arm|PF00514.23|0.16,Arm|PF00514.23|0.00028,Arm|PF00514.23|0.00036,Arm|PF00514.23|0.0005,Arm|PF00514.23|1.2e+02,Arm|PF00514.23|1.9e+03,Arm|PF00514.23|0.3,Arm|PF00514.23|56,Arm|PF00514.23|1.1e+04,Arm|PF00514.23|31,Arm|PF00514.23|0.00037,Ank_4|PF13637.6|0.25,Ank_4|PF13637.6|0.0022,Ank_4|PF13637.6|0.00035,Ank_4|PF13637.6|1.3e-05,Ank_5|PF13857.6|…	0.083	0	2	3	3	3	1	1364	150.9	7.15	0	3	1.433	1.96	1.388	1.98	2.894	2.309	3.284	49.2	70.6	96.5	68.3	97.5	142.5	113.7	161.7	Low	Low	Low	Low	Low	Low	Low	Low
OFAVBQ_DN222960_c0_g1_i1.p1	type:3prime_partial	(-),score=265.84,UTP20_HUMAN	High	35.102 0.0,DRIM|PF07539.12|1e+03,DRIM|PF07539.12|2.7e+02,DRIM|PF07539.12|2.9e-172,DRIM|PF07539.12|60,Swm2|PF17083.5|9.5,Swm2|PF17083.5|1.2e+02,Swm2|PF17083.5|6.6e+02 OFAVBQ_DN222960_c0_g1_i1:1-5268(-)	0.085	0	1	2	2	2	1	1756	199.6	6.35	0	2	1.244	1.283	1.09	1.286	1.157	1.007	0.722	91	113.2	116.8	99.2	117.1	105.3	91.7	65.8	Low	Low	Low	Low	Low	Low	Low	Low
OFAVBQ_DN152712_c1_g3_i1.p1			High	OFAVBQ_DN152712_c1_g3~~OFAVBQ_DN152712_c1_g3_i1.p1 ORF type:5prime_partial len:87 (+),score=11.33 OFAVBQ_DN152712_c1_g3_i1:3-263(+)	0.085	0	8	1	1	1	1	86	9.8	9.8	0	1																Low	Low	Low	Low	Low	Low	Low	Low
OFAVBQ_DN223410_c0_g1_i7.p1	type:complete	(-),score=307.98,PHIP_MOUSE	High	45.480 0.0,Bromodomain|PF00439.25|2.9e-14,Bromodomain|PF00439.25|1.8e-19,WD40|PF00400.32|0.00019,WD40|PF00400.32|1.6e-05,WD40|PF00400.32|0.0048,WD40|PF00400.32|0.025,WD40|PF00400.32|0.00079,WD40|PF00400.32|5.4e+02,WD40|PF00400.32|0.054,WD40|PF00400.32|7.3,ANAPC4_WD40|PF12894.7|3.8,ANAPC4_WD40|PF12894.7|59,ANAPC4_WD40|PF12894.7|1.1e+02,ANAPC4_WD40|PF12894.7|28,ANAPC4_WD40|PF12894.7|1.5e+02,Auxin_r…	0.085	0	1	2	2	2	1	1758	197.5	5.54	0	2																Low	Low	Low	Low	Low	Low	Low	Low
OFAVBQ_DN223778_c3_g1_i2.p1	type:5prime_partial	(-),score=267.25,MUC5A_HUMAN	High	37.755 3.99e-08,Ldl_recept_a|PF00057.18|3.7e-11,Ldl_recept_a|PF00057.18|3.5e-07,Ldl_recept_a|PF00057.18|6e-08,Ldl_recept_a|PF00057.18|1.8e+04,F5_F8_type_C|PF00754.25|1.6e-22,F5_F8_type_C|PF00754.25|9e+03,VWC|PF00093.18|1.8e+04,VWC|PF00093.18|1.9e-08,VWC|PF00093.18|1.8e+04,VWC|PF00093.18|1.8e+04,VWC|PF00093.18|1.8e+04,VWC|PF00093.18|0.0077,VWC|PF00093.18|9.6e+03,VWC|PF00093.18|3.2e-05,VWC|PF00093.…	0.087	0	1	1	3	1	1	1612	172	8.76	0	1																Low	Not Found	Low	Low	Low	Low	Low	Low
OFAVBQ_DN224029_c3_g1_i2.p1	type:complete	(-),score=139.87,CMC2_HUMAN	High	52.888 0.0,Mito_carr|PF00153.27|1.4e-24,Mito_carr|PF00153.27|1.5e-17,Mito_carr|PF00153.27|1.3e-22,EF-hand_8|PF13833.6|0.016,EF-hand_8|PF13833.6|0.028,EF-hand_8|PF13833.6|52,EF-hand_8|PF13833.6|1e+03,EF-hand_1|PF00036.32|8e+03,EF-hand_1|PF00036.32|0.27,EF-hand_1|PF00036.32|3.4e-05,EF-hand_1|PF00036.32|3.5e+03,EF-hand_1|PF00036.32|2.2e+02,EF-hand_7|PF13499.6|0.0011,EF-hand_7|PF13499.6|0.02,EF-hand_…	0.087	0	1	1	1	1	1	699	78.5	8.6	0	1																Low	Not Found	Low	Low	Low	Low	Low	Low
OFAVBQ_DN204534_c7_g1_i1.p1	type:complete	(-),score=39.65,RL19_DROME	High	74.872 4.45e-101,Ribosomal_L19e|PF01280.20|7.6e-67,Ribosomal_L19e|PF01280.20|2.9e+03,Band_3_cyto|PF07565.13|1.9 OFAVBQ_DN204534_c7_g1_i1:490-1080(-)	0.087	0	5	1	2	1	1	196	23.3	11.15	1.97	1	1.279	0.978	0.544	0.464	0.467	0.552	0.512	138	176.6	135	75.1	64	64.5	76.2	70.7	Low	Low	Low	Low	Low	Low	Low	Low
OFAVBQ_DN257171_c0_g1_i1.p1	type:internal	(+),score=16.33,DDE_1	High	PF03184.19 0.00093,Copper-fist|PF00649.18|0.15 OFAVBQ_DN257171_c0_g1_i1:1-231(+)	0.07	0	12	1	6	1	1	77	9.4	9.45	0	1																Low	Low	Low	Low	Low	Low	Low	Low
OFAVBQ_DN273261_c0_g1_i1.p1	type:internal	(+),score=11.72,DUF2584	High	PF10763.9 0.54,DUF2584|PF10763.9|1.1e+03 OFAVBQ_DN273261_c0_g1_i1:2-241(+)	0.07	0	9	1	2	1	1	80	9.1	7.12	0	1																Low	Low	Low	Low	Low	Low	Low	Low
OFAVBQ_DN218596_c1_g1_i11.p1	type:complete	(-),score=100.64,MRP4_HUMAN	High	48.164 0.0,MRP4_HUMAN|26.630|4.28e-12,ABC_membrane|PF00664.23|1.2e-36,ABC_tran|PF00005.27|2.3e-16,ABC_tran|PF00005.27|8e-14,MMR_HSR1|PF01926.23|3,MMR_HSR1|PF01926.23|0.0028,AAA_21|PF13304.6|1.8,AAA_21|PF13304.6|1.9e+03,AAA_21|PF13304.6|0.022,SMC_N|PF02463.19|9.2,SMC_N|PF02463.19|3.4,SMC_N|PF02463.19|2,AAA_29|PF13555.6|2.7,AAA_29|PF13555.6|0.051,AAA_16|PF13191.6|1.5,AAA_16|PF13191.6|0.65,RsgA_GTPa…	0.07	0	2	1	1	1	1	725	80.9	5.76	0	1																Low	Not Found	Low	Low	Low	Low	Low	Low
OFAVBQ_DN213362_c1_g1_i1.p1	type:internal	(+),score=34.83,POL5_DROME	High	25.676 1.66e-14,RVT_1|PF00078.27|8.9e-07 OFAVBQ_DN213362_c1_g1_i1:1-453(+)	0.07	0	5	1	1	1	1	151	17.1	6.87	0	1																Low	Low	Low	Low	Low	Low	Low	Low
OFAVBQ_DN221505_c0_g1_i4.p1	type:complete	(-),score=349.83,AFAP1_MOUSE	High	24.138 8.76e-10,AFAP1_MOUSE|26.316|3.72e-06,PH|PF00169.29|2.9e-10,PH|PF00169.29|6.4e-10,PH|PF00169.29|2.6e-08,PH|PF00169.29|4.3e-13,PH_9|PF15410.6|0.7,PH_9|PF15410.6|0.092,PH_9|PF15410.6|6.9,PH_9|PF15410.6|0.4,PH_9|PF15410.6|9.6e+03,PH_11|PF15413.6|1.8e+04,PH_11|PF15413.6|3.3e+02,PH_11|PF15413.6|0.053,PH_11|PF15413.6|71,PH_11|PF15413.6|8.5 OFAVBQ_DN221505_c0_g1_i4:1602-6554(-)	0.107	0	1	2	2	2	1	1650	184.8	6.35	0	2	1.21	0.909	1.131	1.195	0.747	0.716	0.719	104.9	126.9	95.3	118.6	125.4	78.3	75.1	75.4	Low	Low	Low	Low	Low	Low	Low	Low
OFAVBQ_DN212043_c2_g1_i3.p1	type:complete	(-),score=52.12,RCN11_ORYSJ	High	23.106 2.18e-12,DUF563|PF04577.14|1.2e-21 OFAVBQ_DN212043_c2_g1_i3:1355-2767(-)	0.108	0	1	1	3	1	1	470	53.5	9.51	0	1																Low	Low	Low	Low	Low	Low	Low	Low
OFAVBQ_DN198328_c0_g1_i2.p1	type:complete	(-),score=84.64,PRR11_MOUSE	High	37.143 2.26e-15,CAP_N|PF01213.19|0.0031,Mito_fiss_reg|PF05308.11|7.8e+03,Mito_fiss_reg|PF05308.11|0.0097,Mito_fiss_reg|PF05308.11|3.9e+03,MtrG|PF04210.13|0.54,PRIMA1|PF16101.5|2.1 OFAVBQ_DN198328_c0_g1_i2:896-2152(-)	0.108	0	4	2	2	2	1	418	47.1	10.13	0	2																Low	Low	Low	Low	Low	Low	Low	Low
OFAVBQ_DN204963_c0_g1_i5.p1	type:complete	(+),score=-7.16,GIY-YIG	High	PF01541.24 2.1e-06 OFAVBQ_DN204963_c0_g1_i5:1577-2050(+)	0.108	0	4	1	1	1	1	157	18.2	9.69	0	1																Low	Not Found	Low	Low	Low	Low	Low	Low
OFAVBQ_DN193779_c0_g2_i1.p1			High	OFAVBQ_DN193779_c0_g2~~OFAVBQ_DN193779_c0_g2_i1.p1 ORF type:complete len:89 (+),score=5.24 OFAVBQ_DN193779_c0_g2_i1:378-644(+)	0.108	0	16	2	4	2	1	88	10.4	10.33	0	2																Low	Not Found	Low	Low	Low	Low	Low	Low
OFAVBQ_DN240428_c0_g1_i1.p1	type:internal	(+),score=6.56,Integrase_H2C2	High	PF17921.1 1.2e-06,zf-H2C2|PF09337.10|2e+03,zf-H2C2|PF09337.10|0.41 OFAVBQ_DN240428_c0_g1_i1:1-231(+)	0.108	0	18	1	1	1	1	77	9	11.18	0	1	1.504	1.482	0.562	0.719	1.006	0.784	1.285	95.9	144.3	142.2	53.9	68.9	96.4	75.2	123.2	Low	Low	Low	Low	Low	Low	Low	Low
OFAVBQ_DN213176_c4_g1_i6.p1	type:5prime_partial	(-),score=32.56,LIN41_MOUSE	High	40.079 1.14e-52,LIN41_MOUSE|40.435|1.44e-45,LIN41_MOUSE|37.748|4.11e-25,LIN41_MOUSE|35.032|1.13e-20,NHL|PF01436.21|0.02,NHL|PF01436.21|2.1e-09,NHL|PF01436.21|0.00012,NHL|PF01436.21|11,NHL|PF01436.21|6e-10,NHL|PF01436.21|6.2e-05,DUF5128|PF17170.4|1.9,DUF5128|PF17170.4|0.052,DUF5128|PF17170.4|0.078,DUF5128|PF17170.4|7e-06,DUF5128|PF17170.4|0.00092,SGL|PF08450.12|0.039,SGL|PF08450.12|8,SGL|PF08450.1…	0.109	0	4	1	1	1	1	249	27.6	7.21	0	1																Low	Not Found	Low	Low	Low	Low	Low	Low
OFAVBQ_DN224570_c3_g1_i2.p1	type:complete	(-),score=18.65,POL3_DROME	High	34.328 3.91e-19,RT_RNaseH_2|PF17919.1|2.6e-25,RT_RNaseH|PF17917.1|3e-19 OFAVBQ_DN224570_c3_g1_i2:68-559(-)	0.095	0	6	1	1	1	1	163	18.9	8.09	0	1																Low	Not Found	Low	Low	Low	Low	Low	Low
OFAVBQ_DN202048_c5_g2_i1.p1	type:5prime_partial	(-),score=19.16,PGBM_HUMAN	High	31.868 3.13e-18,PGBM_HUMAN|30.968|2.16e-15,PGBM_HUMAN|32.653|2.27e-12,PGBM_HUMAN|29.560|9.99e-11,PGBM_HUMAN|28.902|1.20e-10,PGBM_HUMAN|31.579|1.74e-10,PGBM_HUMAN|32.168|1.98e-10,PGBM_HUMAN|30.345|2.04e-10,PGBM_HUMAN|32.000|3.41e-10,PGBM_HUMAN|27.273|4.54e-10,PGBM_HUMAN|28.947|1.87e-09,PGBM_HUMAN|27.273|1.87e-09,PGBM_HUMAN|29.448|2.64e-09,PGBM_HUMAN|26.087|1.68e-08,PGBM_HUMAN|25.882|2.59e-08,PGBM_…	0.107	0	9	1	1	1	1	183	20	8.46	0	1	0.01	1.073	1.02	1.283	1.3	1.437	1.861	89.1		95.7	90.9	114.4	115.9	128.1	165.9	Low	Not Found	Low	Low	Low	Low	Low	Low
OFAVBQ_DN325688_c0_g1_i1.p2			High	OFAVBQ_DN325688_c0_g1~~OFAVBQ_DN325688_c0_g1_i1.p2 ORF type:5prime_partial len:138 (+),score=2.19 OFAVBQ_DN325688_c0_g1_i1:2-415(+)	0.088	0	6	1	1	1	1	137	15.3	9.07	0	1																Low	Not Found	Low	Low	Low	Low	Low	Low
OFAVBQ_DN217578_c0_g2_i2.p1	type:complete	(-),score=73.02,ALS_MOUSE	High	29.060 1.64e-54,LRR_8|PF13855.6|3.1e-11,LRR_8|PF13855.6|4.3e-15,LRR_8|PF13855.6|2.5e-13,LRR_8|PF13855.6|2e-08,LRR_8|PF13855.6|1.5e-05,LRR_8|PF13855.6|3e-11,LRR_8|PF13855.6|1.4e-13,LRR_8|PF13855.6|1.5e-14,LRR_8|PF13855.6|7.5e-09,LRR_8|PF13855.6|3.1e-08,LRR_8|PF13855.6|7.9e-07,LRR_8|PF13855.6|1.9e-07,LRR_8|PF13855.6|3e-10,LRR_8|PF13855.6|7.5e-12,LRR_8|PF13855.6|2.1e-06,LRR_5|PF13306.6|5e-10,LRR_5|P…	0.088	0	1	1	1	1	1	929	104.5	9.1	0	1																Low	Low	Low	Low	Low	Low	Low	Low
OFAVBQ_DN215484_c7_g3_i3.p1	type:complete	(-),score=220.12,CADN_ACRMI	High	44.209 0.0,CADN_ACRMI|42.963|2.23e-95,VWA|PF00092.28|9.6e-16,VWA|PF00092.28|3.6e-05,VWA|PF00092.28|2e-12,TSP_1|PF00090.19|0.00023,TSP_1|PF00090.19|3.8e-10,TSP_1|PF00090.19|7.5e-11,TSP_1|PF00090.19|4.3e-07,TSP_1|PF00090.19|0.0022,TSP_1|PF00090.19|1.7e+04,F5_F8_type_C|PF00754.25|1.2e-10,F5_F8_type_C|PF00754.25|5.6e-11,VWA_2|PF13519.6|6.5e-07,VWA_2|PF13519.6|0.056,VWA_2|PF13519.6|0.003,VWA_3|PF13768…	0.074	0	2	2	4	2	1	1554	169.1	5.02	0	2	0.01	1.307	0.899	1.271	1.433	1.199	1.841	89.4		116.8	80.4	113.6	128.1	107.2	164.6	Low	Low	Low	Low	Low	Low	Low	Low
OFAVBQ_DN212722_c0_g1_i1.p1	type:complete	(-),score=75.52,TMEM151	High	PF14857.6 9e+02,TMEM151|PF14857.6|0.0054,ABC2_membrane_3|PF12698.7|0.062,EGF_2|PF07974.13|0.35,PRIMA1|PF16101.5|0.39 OFAVBQ_DN212722_c0_g1_i1:681-3008(-)	0.074	0	1	1	2	1	1	775	87.8	6.18	0	1																Low	Not Found	Low	Low	Low	Low	Low	Low
OFAVBQ_DN203713_c0_g1_i1.p1	type:complete	(-),score=46.45,CTSL2_MOUSE	High	49.415 1.01e-126,NIF|PF03031.18|7.9e-52 OFAVBQ_DN203713_c0_g1_i1:1751-3004(-)	0.074	0	2	1	1	1	1	417	47.1	6.07	0	1																Low	Not Found	Low	Low	Low	Not Found	Low	Low
OFAVBQ_DN216757_c2_g1_i7.p5	type:complete	(+),score=3.39,ATP-grasp	High	PF02222.22 0.025,DUF4554|PF15091.6|0.18 OFAVBQ_DN216757_c2_g1_i7:838-1095(+)	0.074	0	9	1	2	1	1	85	9.9	9.94	0	1																Low	Not Found	Low	Low	Low	Low	Low	Low
OFAVBQ_DN295245_c0_g1_i1.p1	type:internal	(-),score=6.24,rve	High	PF00665.26 0.014 OFAVBQ_DN295245_c0_g1_i1:1-228(-)	0.074	0	8	1	1	1	1	76	8.4	7.91	0	1																Low	Not Found	Low	Low	Low	Low	Low	Low
OFAVBQ_DN90195_c0_g2_i1.p1	type:3prime_partial	(-),score=-2.83,SURF4_TAKRU	High	64.789 5.54e-30,SURF4|PF02077.15|2.7e-24,SURF2|PF05477.11|0.012,Caerin_1|PF07440.12|0.093,LPD37|PF18853.1|0.22 OFAVBQ_DN90195_c0_g2_i1:1-222(-)	0.074	0	8	1	1	1	1	74	8.8	7.39	0	1																Low	Low	Low	Low	Low	Low	Low	Low
OFAVBQ_DN209548_c2_g2_i1.p1	type:complete	(-),score=14.21,SELTB_DANRE	High	48.305 2.70e-36,Rdx|PF10262.9|5.5e-10 OFAVBQ_DN209548_c2_g2_i1:386-754(-)	0.074	0	10	1	2	1	1	122	13.8	5.86	0	1																Low	Low	Low	Low	Low	Low	Low	Low
OFAVBQ_DN212475_c1_g1_i1.p3	type:5prime_partial	(-),score=0.80,DUF1936	High	PF09151.10 0.14,DUF1936|PF09151.10|9.8e+02 OFAVBQ_DN212475_c1_g1_i1:612-827(-)	0.073	0	25	2	2	2	1	71	8.2	8.92	0	2	1.262	0.811	0.738	0.659	0.513	0.753	0.771	123	155.2	99.7	90.7	81.1	63	92.6	94.8	Low	Low	Low	Low	Low	Low	Low	Low
OFAVBQ_DN200268_c1_g3_i3.p1	type:complete	(-),score=31.93,CP087_DANRE	High	28.743 2.10e-06,UPF0547|PF10571.9|0.0097,Abp2|PF09441.10|0.026 OFAVBQ_DN200268_c1_g3_i3:603-1112(-)	0.107	0	4	1	3	1	1	169	19.4	9.63	0	1																Low	Not Found	Low	Low	Low	Low	Low	Low
OFAVBQ_DN200310_c3_g2_i1.p2	type:5prime_partial	(-),score=18.83,DUF1759	High	PF03564.15 0.0081 OFAVBQ_DN200310_c3_g2_i1:624-1019(-)	0.107	0	8	1	1	1	1	131	14.3	6.79	0	1																Low	Not Found	Low	Low	Low	Not Found	Low	Not Found
OFAVBQ_DN240011_c0_g1_i1.p1	type:complete	(+),score=67.31,DUF4407	High	PF14362.6 0.025,DUF5451|PF17532.2|1.3e+03,DUF5451|PF17532.2|0.31 OFAVBQ_DN240011_c0_g1_i1:161-1306(+)	0.109	0	5	1	1	1	1	381	42.7	7.77	0	1	2.111	1.648	1.163	1.53	1.828	1.501	1.692	64.1	135.4	105.7	74.6	98.1	117.3	96.3	108.5	Low	Low	Low	Low	Low	Low	Low	Low
OFAVBQ_DN219834_c0_g1_i1.p1	type:complete	(-),score=123.68,LIN41_DANRE	High	36.471 1.73e-152,NHL|PF01436.21|2.3e-11,NHL|PF01436.21|6.9e-08,NHL|PF01436.21|0.33,NHL|PF01436.21|2.9e-05,NHL|PF01436.21|7.5e-08,NHL|PF01436.21|8.7e-07,DUF5128|PF17170.4|1.9e+03,DUF5128|PF17170.4|0.037,DUF5128|PF17170.4|0.067,DUF5128|PF17170.4|0.0016,DUF5128|PF17170.4|0.00055,Filamin|PF00630.19|9.4e-16,SGL|PF08450.12|0.00036,SGL|PF08450.12|1.8,SGL|PF08450.12|0.0059,SGL|PF08450.12|2.1e+02,zf-RING_…	0.103	0	2	2	2	2	1	749	84.3	6.04	0	2																Low	Low	Low	Low	Low	Low	Low	Low
OFAVBQ_DN205863_c5_g1_i1.p1	type:complete	(+),score=3.48,Me-amine-dh_L	High	PF02975.14 0.0098 OFAVBQ_DN205863_c5_g1_i1:173-463(+)	0.103	0	7	1	1	1	1	96	10.9	8.65	0	1	1.421	0.906	0.913	3.69	0.93	1.944	1.256	66.3	94.3	60.1	60.6	244.7	61.7	129	83.3	Low	Low	Low	Low	Low	Low	Low	Low
OFAVBQ_DN129348_c0_g1_i1.p1	type:internal	(-),score=12.64,AQ12A_HUMAN	High	27.465 3.31e-12,MIP|PF00230.20|0.018 OFAVBQ_DN129348_c0_g1_i1:2-433(-)	0.103	0	6	1	1	1	1	144	15.3	6.67	0	1																Low	Not Found	Low	Low	Low	Low	Low	Low
OFAVBQ_DN230859_c0_g1_i1.p1	type:internal	(+),score=17.59,HAOX1_MOUSE	High	72.816 5.02e-45,FMN_dh|PF01070.18|1.7e-51,IMPDH|PF00478.25|5.7e-08,ThiG|PF05690.14|0.69,ThiG|PF05690.14|0.26,Glu_synthase|PF01645.17|0.0015,His_biosynth|PF00977.21|1.1e+02,His_biosynth|PF00977.21|0.052,TMP-TENI|PF02581.17|0.076,TMP-TENI|PF02581.17|2.2e+02,NMO|PF03060.15|0.025,G3P_antiterm|PF04309.12|5.7,G3P_antiterm|PF04309.12|26 OFAVBQ_DN230859_c0_g1_i1:2-322(+)	0.103	0	27	1	2	1	1	107	11.3	6.28	0	1																Low	Not Found	Low	Low	Low	Low	Low	Low
OFAVBQ_DN225087_c4_g1_i4.p3	type:complete	(-),score=4.38,Tax	High	PF02959.16 0.096 OFAVBQ_DN225087_c4_g1_i4:259-483(-)	0.103	0	8	1	1	1	1	74	8.5	9.6	0	1																Low	Not Found	Low	Low	Low	Low	Low	Low
OFAVBQ_DN105177_c0_g1_i1.p1	type:5prime_partial	(-),score=110.37,DOPO_RAT	High	27.214 1.44e-36,Cu2_monoox_C|PF03712.15|7e-26,DOMON|PF03351.17|3e-18,Cu2_monooxygen|PF01082.20|4.4e-12 OFAVBQ_DN105177_c0_g1_i1:71-2011(-)	0.103	0	3	1	2	1	1	646	68.7	5.2	0	1																Low	Not Found	Low	Low	Low	Low	Low	Low
OFAVBQ_DN201218_c2_g1_i3.p1			High	OFAVBQ_DN201218_c2_g1~~OFAVBQ_DN201218_c2_g1_i3.p1 ORF type:complete len:98 (-),score=6.49 OFAVBQ_DN201218_c2_g1_i3:247-540(-)	0.104	0	6	1	1	1	1	97	10.8	9.29	0	1																Low	Not Found	Low	Low	Low	Low	Low	Low
OFAVBQ_DN225378_c6_g1_i2.p1	type:3prime_partial	(-),score=59.22,PAR14_MOUSE	High	33.437 1.35e-47,PARP|PF00644.20|5.2e-27,Cas9_b_hairpin|PF17893.1|0.087 OFAVBQ_DN225378_c6_g1_i2:1-1017(-)	0.104	0	3	1	16	1	1	339	38.8	9.03	0	1																Low	Low	Low	Low	Low	Low	Low	Low
OFAVBQ_DN210920_c0_g1_i1.p1			High	OFAVBQ_DN210920_c0_g1~~OFAVBQ_DN210920_c0_g1_i1.p1 ORF type:5prime_partial len:73 (-),score=1.89 OFAVBQ_DN210920_c0_g1_i1:37-255(-)	0.104	0	14	1	1	1	1	72	8.1	10.74	0	1	1.221	0.731	0.683	0.784	0.628	0.804	0.547	125	152.7	91.4	85.4	98.1	78.5	100.6	68.4	Low	Low	Low	Low	Low	Low	Low	Low
OFAVBQ_DN337607_c0_g1_i1.p1	type:internal	(-),score=6.71,DNA_pol_B_2	High	PF03175.13 7.1e-08 OFAVBQ_DN337607_c0_g1_i1:3-266(-)	0.104	0	8	1	2	1	1	88	10	8.72	0	1	0.01	1.236	1.382	1.489	1.646	1.16	3.428	70.5		87.2	97.5	105.1	116.1	81.8	241.9	Low	Not Found	Low	Low	Low	Low	Low	Low
OFAVBQ_DN214194_c0_g1_i10.p1			High	OFAVBQ_DN214194_c0_g1~~OFAVBQ_DN214194_c0_g1_i10.p1 ORF type:complete len:181 (-),score=14.76 OFAVBQ_DN214194_c0_g1_i10:6332-6874(-)	0.104	0	8	1	1	1	1	180	20.5	9.86	0	1																Low	Not Found	Low	Low	Low	Low	Low	Low
OFAVBQ_DN223573_c2_g1_i2.p1	type:complete	(-),score=426.23,GRD2I_HUMAN	High	36.939 2.43e-67,GRD2I_HUMAN|27.708|1.18e-30,GRD2I_HUMAN|54.054|1.70e-15,GRD2I_HUMAN|29.891|1.72e-11,FH2|PF02181.23|3.4e+03,FH2|PF02181.23|8.4e-100,FH2|PF02181.23|8.4e+03,PDZ|PF00595.24|5.6e-10,PDZ|PF00595.24|1.1e-13,PDZ|PF00595.24|8.9e-14,PDZ_6|PF17820.1|1.7e-11,PDZ_6|PF17820.1|2.9e-09,PDZ_6|PF17820.1|6.7e-12,PDZ_2|PF13180.6|4.4e-05,PDZ_2|PF13180.6|0.00031,PDZ_2|PF13180.6|0.00013,PDZ_2|PF13180.6|…	0.107	0	1	2	2	2	1	2098	229.2	7.01	0	2																Low	Not Found	Low	Low	Low	Low	Low	Low
OFAVBQ_DN221416_c1_g1_i3.p1	type:3prime_partial	(-),score=169.23,VWDE_HUMAN	High	28.021 1.46e-64,VWDE_HUMAN|24.693|1.30e-31,VWDE_HUMAN|28.028|7.47e-07,hEGF|PF12661.7|3.2e+02,hEGF|PF12661.7|0.16,hEGF|PF12661.7|0.0055,hEGF|PF12661.7|0.014,hEGF|PF12661.7|3.9e-07,hEGF|PF12661.7|0.00062,hEGF|PF12661.7|0.0029,hEGF|PF12661.7|1.3e+04,hEGF|PF12661.7|0.0016,EGF|PF00008.27|1.8e+04,EGF|PF00008.27|1.8e+04,EGF|PF00008.27|3.5e+03,EGF|PF00008.27|1.8e+04,EGF|PF00008.27|0.032,EGF|PF00008.27|0.…	0.105	0	1	2	5	1	1	1377	152.6	5.86	0	2	0.01	1.526	1.255	1.744	1.422	1.226	3.47	68.7		104.9	86.2	119.8	97.7	84.3	238.4	Low	Not Found	Low	Low	Low	Low	Low	Low
OFAVBQ_DN216474_c0_g1_i2.p1	type:complete	(-),score=92.41,MTAP2_MOUSE	High	41.667 4.44e-10,Tubulin-binding|PF00418.19|3.1e+03,Tubulin-binding|PF00418.19|1.1,Tubulin-binding|PF00418.19|4.9e-11 OFAVBQ_DN216474_c0_g1_i2:1016-3376(-)	0.11	0	3	3	3	3	1	786	86.7	9.8	0	3																Low	Low	Low	Low	Low	Low	Low	Low
OFAVBQ_DN221857_c0_g1_i11.p1	type:complete	(-),score=254.74,DEN5B_HUMAN	High	46.258 0.0,DEN5B_HUMAN|49.882|4.45e-134,DENN|PF02141.21|1.2e-52,RUN|PF02759.19|1.8e-19,RUN|PF02759.19|0.078,dDENN|PF03455.19|1.1e-16,uDENN|PF03456.18|1.3e-14,uDENN|PF03456.18|3.1e+03,uDENN|PF03456.18|1.2e+04,PLAT|PF01477.23|4e-14,Cyc-maltodext_C|PF10438.9|0.067 OFAVBQ_DN221857_c0_g1_i11:1632-5573(-)	0.11	0	2	3	4	3	1	1313	148	6.92	0	3																Low	Not Found	Low	Low	Low	Low	Low	Low
OFAVBQ_DN198199_c3_g1_i1.p1	type:5prime_partial	(+),score=31.84,Y2R2_DROME	High	27.326 1.50e-07,Exo_endo_phos_2|PF14529.6|4.1e-09,RVT_1|PF00078.27|0.034 OFAVBQ_DN198199_c3_g1_i1:3-1775(+)	0.11	0	1	1	7	1	1	590	67.6	9.45	0	1																Low	Low	Low	Low	Low	Low	Low	Low
OFAVBQ_DN334803_c0_g1_i1.p1	type:internal	(-),score=11.43,YRD6_CAEEL	High	42.857 2.23e-12,rve|PF00665.26|3.5e-13,rve_3|PF13683.6|0.046 OFAVBQ_DN334803_c0_g1_i1:2-211(-)	0.111	0	14	1	2	1	1	70	7.7	8.76	0	1																Low	Not Found	Low	Low	Low	Low	Low	Low
OFAVBQ_DN174373_c0_g1_i1.p1			High	OFAVBQ_DN174373_c0_g1~~OFAVBQ_DN174373_c0_g1_i1.p1 ORF type:internal len:174 (-),score=17.68 OFAVBQ_DN174373_c0_g1_i1:1-519(-)	0.109	0	6	1	1	1	1	173	18.9	5.34	0	1																Low	Not Found	Low	Low	Low	Low	Low	Low
OFAVBQ_DN207345_c3_g2_i1.p1			High	OFAVBQ_DN207345_c3_g2~~OFAVBQ_DN207345_c3_g2_i1.p1 ORF type:5prime_partial len:71 (-),score=3.41 OFAVBQ_DN207345_c3_g2_i1:59-271(-)	0.107	0	9	1	1	1	1	70	8.4	10.89	0	1																Low	Low	Low	Low	Low	Low	Low	Low
OFAVBQ_DN207636_c7_g4_i1.p1	type:complete	(-),score=42.99,RAB9A_CANLF	High	35.429 6.75e-34,Ras|PF00071.22|1.4e-42,Roc|PF08477.13|3.6e-28,Arf|PF00025.21|2.9e-13,PduV-EutP|PF10662.9|4.5,PduV-EutP|PF10662.9|0.014,MMR_HSR1|PF01926.23|0.00036,GTP_EFTU|PF00009.27|0.00086,RsgA_GTPase|PF03193.16|6.8,RsgA_GTPase|PF03193.16|0.27,SRPRB|PF09439.10|0.0044,TsaE|PF02367.17|0.17,TsaE|PF02367.17|6.6e+03,AAA_24|PF13479.6|0.51,AAA_24|PF13479.6|1.6e+02,cobW|PF02492.19|16,cobW|PF02492.19|5,…	0.074	0	4	1	1	1	1	204	22.9	6.74	0	1																Low	Low	Low	Low	Low	Low	Low	Low
OFAVBQ_DN222189_c1_g4_i2.p1	type:internal	(-),score=77.91,PATS1_DICDI	High	22.000 4.60e-15,COR|PF16095.5|2.7e-13,Roc|PF08477.13|6.7e+03,Roc|PF08477.13|3.1e-08,Ras|PF00071.22|1.5e-05 OFAVBQ_DN222189_c1_g4_i2:1-2217(-)	0.079	0	5	3	3	3	1	739	84.6	7.84	0	3																Low	Not Found	Low	Low	Low	Low	Low	Low
OFAVBQ_DN211175_c0_g1_i3.p1	type:complete	(-),score=51.34,DUF1737	High	PF08410.10 0.29 OFAVBQ_DN211175_c0_g1_i3:700-1572(-)	0.074	0	2	1	1	1	1	290	33.4	6.58	0	1																Low	Not Found	Low	Low	Low	Low	Low	Low
OFAVBQ_DN221260_c5_g1_i1.p1	type:complete	(-),score=39.19,SIFAR_DROME	High	26.752 3.54e-28,7tm_1|PF00001.21|9.8e+02,7tm_1|PF00001.21|1.3e-37,7TM_GPCR_Srw|PF10324.9|1.4e-08,7TM_GPCR_Srsx|PF10320.9|3.1e-08,7TM_GPCR_Srv|PF10323.9|63,7TM_GPCR_Srv|PF10323.9|3.2e-06,7TM_GPCR_Srx|PF10328.9|0.00017,7tm_4|PF13853.6|3e-05,7tm_4|PF13853.6|3.4e+03,DUF898|PF05987.13|1e+03,DUF898|PF05987.13|0.045,DUF5305|PF17231.2|6.2,DUF5305|PF17231.2|53,TMEM154|PF15102.6|1.1e+02,TMEM154|PF15102.6|3…	0.075	0	2	1	1	1	1	375	42.4	9.41	0	1																Low	Not Found	Low	Low	Low	Low	Low	Low
OFAVBQ_DN170276_c0_g2_i1.p2	type:internal	(-),score=9.93,RL10_DROME	High	66.355 4.51e-45,Ribosomal_L16|PF00252.18|3.5e-13 OFAVBQ_DN170276_c0_g2_i1:3-338(-)	0.077	0	8	1	1	1	1	112	12.6	10.17	0	1																Low	Not Found	Low	Low	Low	Low	Low	Low
OFAVBQ_DN206829_c0_g1_i2.p1	type:complete	(-),score=31.84,YBEY_HUMAN	High	38.889 1.72e-28,UPF0054|PF02130.17|6.9e-25 OFAVBQ_DN206829_c0_g1_i2:973-1575(-)	0.076	0	3	1	2	1	1	200	22.9	6.29	0	1	0.48	0.343	0.627	0.738	0.279	0.535	0.209	190	91.1	65.2	119.2	140.2	53.1	101.6	39.7	Low	Low	Low	Low	Low	Low	Low	Low
OFAVBQ_DN200615_c3_g7_i1.p1			High	OFAVBQ_DN200615_c3_g7~~OFAVBQ_DN200615_c3_g7_i1.p1 ORF type:internal len:288 (-),score=42.50 OFAVBQ_DN200615_c3_g7_i1:1-861(-)	0.075	0	5	1	1	1	1	287	33.3	6.32	0	1																Not Found	Not Found	Not Found	Not Found	Not Found	Not Found	Not Found	Not Found
OFAVBQ_DN225353_c2_g2_i4.p1			High	OFAVBQ_DN225353_c2_g2~~OFAVBQ_DN225353_c2_g2_i4.p1 ORF type:3prime_partial len:195 (-),score=25.57 OFAVBQ_DN225353_c2_g2_i4:1-582(-)	0.075	0	4	1	1	1	1	194	22.3	6.55	0	1																Low	Low	Low	Low	Low	Low	Low	Low
OFAVBQ_DN215024_c2_g2_i2.p1	type:3prime_partial	(-),score=84.21,FUCL_ANGAN	High	38.926 1.77e-25,FUCL_ANGAN|31.293|1.09e-08,F5_F8_type_C|PF00754.25|1e-21,F5_F8_type_C|PF00754.25|0.00017,F5_F8_type_C|PF00754.25|7.5e-07,F5_F8_type_C|PF00754.25|3.5e-24,fn3|PF00041.21|9.8e+03,fn3|PF00041.21|2.8e-08,Capsid_VP7|PF17071.5|3.4e+03,Capsid_VP7|PF17071.5|0.68 OFAVBQ_DN215024_c2_g2_i2:3-2294(-)	0.075	0	2	2	3	1	1	764	84.3	7.97	0	2	1.145	0.626	0.794	0.895	0.932	0.847	0.759	114.3	130.9	71.6	90.7	102.3	106.5	96.8	86.8	Low	Low	Low	Low	Low	Low	Low	Low
OFAVBQ_DN215815_c1_g1_i1.p1	type:complete	(-),score=214.87,DPOD1_MOUSE	High	62.986 0.0,DNA_pol_B|PF00136.21|2.3e-148,DNA_pol_B_exo1|PF03104.19|3.1e-83,zf-C4pol|PF14260.6|1.4e-18,DNA_pol_B_2|PF03175.13|4.2e-05,DNA_pol_B_2|PF03175.13|2.9e+03,DNA_pol_B_2|PF03175.13|4.3e+03,DNA_pol_B_exo2|PF10108.9|0.036,DZR|PF12773.7|0.24,zf-ribbon_3|PF13248.6|0.51,zf-ribbon_3|PF13248.6|8.1e+03 OFAVBQ_DN215815_c1_g1_i1:557-3796(-)	0.075	0	6	6	7	6	1	1079	121.2	8.37	0	6																Low	Low	Low	Low	Low	Low	Low	Low
OFAVBQ_DN214762_c0_g1_i1.p1	type:complete	(-),score=305.67,ZSWM8_MOUSE	High	58.218 2.62e-179,ZSWM8_MOUSE|42.697|9.90e-121,ZSWM8_MOUSE|46.610|9.62e-51,SWIM|PF04434.17|0.24 OFAVBQ_DN214762_c0_g1_i1:358-5784(-)	0.075	0	2	4	4	4	1	1808	196.6	6.04	0	4	1.203	1.266	0.885	1.004	0.806	0.93	0.906	100	120.3	126.6	88.5	100.4	80.6	93	90.6	Low	Low	Low	Low	Low	Low	Low	Low
OFAVBQ_DN220680_c2_g3_i8.p1	type:5prime_partial	(-),score=373.91,CENPC_HUMAN	High	35.606 1.41e-33,CENP-C_C|PF11699.8|2.4e-23,Mif2_N|PF15624.6|8.7e-05,Mif2_N|PF15624.6|2e-06,Mif2_N|PF15624.6|52,Mif2_N|PF15624.6|1.8e+04,Mif2_N|PF15624.6|1.8e+04,Mif2_N|PF15624.6|1.8e+04,Mif2_N|PF15624.6|1.9e+03,Mif2_N|PF15624.6|1.8e+04,Mif2_N|PF15624.6|1.4e+04,Cupin_2|PF07883.11|2.6e-06,MannoseP_isomer|PF01050.18|0.047,Cupin_1|PF00190.22|0.098 OFAVBQ_DN220680_c2_g3_i8:448-4377(-)	0.075	0	2	1	1	1	1	1309	143.5	6.07	0	1																Not Found	Not Found	Not Found	Not Found	Not Found	Not Found	Not Found	Not Found
OFAVBQ_DN218556_c1_g1_i13.p1	type:complete	(-),score=158.03,PTN12_HUMAN	High	43.771 6.25e-78,Y_phosphatase|PF00102.27|6.9e-71,DSPc|PF00782.20|5.1e+03,DSPc|PF00782.20|0.0001,Y_phosphatase3|PF13350.6|0.0045 OFAVBQ_DN218556_c1_g1_i13:1704-4517(-)	0.077	0	2	2	20	2	1	937	101.4	9.03	0	2																Low	Not Found	Low	Low	Low	Low	Low	Low
OFAVBQ_DN222154_c5_g1_i1.p1	type:5prime_partial	(-),score=18.45,Phage_tail_X	High	PF05489.12 0.25,Phage_tail_X|PF05489.12|1.1e+03 OFAVBQ_DN222154_c5_g1_i1:1367-1597(-)	0.075	0	9	1	3	1	1	76	8.3	7.25	0	1																Low	Not Found	Low	Low	Low	Low	Low	Low
OFAVBQ_DN216275_c0_g1_i8.p1	type:complete	(-),score=74.81,Myosin_TH1	High	PF06017.13 0.029 OFAVBQ_DN216275_c0_g1_i8:179-1861(-)	0.076	0	4	3	5	3	1	560	63.1	9.19	0	3	0.976	1.162	1.321	1.312	1.473	1.742	1.702	74.9	73.1	87	98.9	98.2	110.3	130.4	127.4	Low	Low	Low	Low	Low	Low	Low	Low
OFAVBQ_DN201335_c6_g3_i1.p2	type:complete	(+),score=5.75,Arena_ncap_C	High	PF17290.2 0.052 OFAVBQ_DN201335_c6_g3_i1:546-821(+)	0.075	0	7	1	1	1	1	91	11	9.36	0	1																Low	Not Found	Low	Low	Low	Low	Low	Low
OFAVBQ_DN218301_c1_g1_i1.p1	type:complete	(-),score=370.03,ZC3HD_MOUSE	High	36.596 7.72e-27,ZC3HD_MOUSE|40.260|1.36e-08,zf-CCCH|PF00642.24|6.3e-05,zf_CCCH_4|PF18345.1|0.00044,zf-CCCH_4|PF18044.1|0.0087,zf-CCCH_2|PF14608.6|0.11 OFAVBQ_DN218301_c1_g1_i1:279-5378(-)	0.073	0	2	3	3	3	1	1699	193.2	8.75	0	3																Low	Low	Low	Low	Low	Low	Low	Low
OFAVBQ_DN207136_c1_g3_i1.p1			High	OFAVBQ_DN207136_c1_g3~~OFAVBQ_DN207136_c1_g3_i1.p1 ORF type:complete len:89 (+),score=7.72 OFAVBQ_DN207136_c1_g3_i1:243-509(+)	0.073	0	8	1	1	1	1	88	10.3	10.08	0	1																Low	Not Found	Low	Low	Low	Low	Low	Low
OFAVBQ_DN198315_c0_g1_i2.p1	type:complete	(-),score=23.53,PSP94	High	PF05825.11 6.4e+02,PSP94|PF05825.11|5,PSP94|PF05825.11|1.1e+03 OFAVBQ_DN198315_c0_g1_i2:210-1043(-)	0.07	0	2	1	2	1	1	277	31.9	9.94	0	1																Low	Not Found	Low	Low	Low	Low	Low	Low
OFAVBQ_DN216626_c0_g1_i2.p1	type:complete	(-),score=83.71,SARNP_MOUSE	High	35.887 5.28e-23,SAP|PF02037.27|1.2e-12,SAP|PF02037.27|6e+03,Tho1_MOS11_C|PF18592.1|9.1e+03,Tho1_MOS11_C|PF18592.1|7e+03,Tho1_MOS11_C|PF18592.1|0.0017,Tho1_MOS11_C|PF18592.1|0.0016,Tho1_MOS11_C|PF18592.1|30,HeH|PF12949.7|0.038 OFAVBQ_DN216626_c0_g1_i2:2420-3157(-)	0.07	0	3	1	1	1	1	245	27.1	5.35	0	1																Low	Low	Low	Low	Low	Low	Low	Low
OFAVBQ_DN101219_c0_g1_i1.p1	type:complete	(-),score=8.29,RL21_CYAPA	High	51.818 1.52e-38,Ribosomal_L21e|PF01157.18|3.4e-42 OFAVBQ_DN101219_c0_g1_i1:120-452(-)	0.07	0	6	1	1	1	1	110	12.9	11.66	0	1																Low	Not Found	Low	Low	Low	Low	Low	Low
OFAVBQ_DN210882_c1_g1_i4.p1	type:complete	(-),score=186.43,DMBT1_HUMAN	High	52.353 6.60e-88,DMBT1_HUMAN|50.418|6.08e-87,DMBT1_HUMAN|50.139|9.84e-87,DMBT1_HUMAN|50.000|1.27e-86,DMBT1_HUMAN|49.584|2.49e-86,DMBT1_HUMAN|49.584|2.81e-86,DMBT1_HUMAN|49.307|2.67e-85,DMBT1_HUMAN|52.321|9.82e-58,DMBT1_HUMAN|52.727|1.31e-24,DMBT1_HUMAN|53.333|4.52e-22,DMBT1_HUMAN|47.619|8.83e-19,SRCR|PF00530.18|1.8e+04,SRCR|PF00530.18|1.8e+04,SRCR|PF00530.18|8.5e-31,SRCR|PF00530.18|1.2e-30,SRCR|PF…	0.07	0	1	3	4	3	1	1755	193.7	7.23	0	3																Low	Low	Low	Low	Low	Low	Low	Low
OFAVBQ_DN316213_c0_g1_i1.p1	type:internal	(-),score=8.24,ODPA_ASCSU	High	51.515 1.13e-15,E1_dh|PF00676.20|2.2e-13 OFAVBQ_DN316213_c0_g1_i1:2-208(-)	0.076	0	12	1	2	1	1	69	8.2	5.11	0	1																Low	Low	Low	Low	Low	Low	Low	Low
OFAVBQ_DN222132_c0_g1_i23.p1	type:5prime_partial	(-),score=57.05,Podoplanin	High	PF05808.11 6.7 OFAVBQ_DN222132_c0_g1_i23:232-921(-)	0.077	0	3	1	2	1	1	229	24.3	3.93	0	1																Low	Not Found	Low	Low	Low	Low	Low	Low
OFAVBQ_DN196847_c3_g1_i1.p1			High	OFAVBQ_DN196847_c3_g1~~OFAVBQ_DN196847_c3_g1_i1.p1 ORF type:3prime_partial len:91 (-),score=11.78 OFAVBQ_DN196847_c3_g1_i1:3-272(-)	0.077	0	10	1	2	1	1	90	10	8.84	0	1																Low	Low	Low	Low	Low	Low	Low	Low
OFAVBQ_DN224556_c5_g5_i1.p1	type:complete	(-),score=195.75,LPIN2_MOUSE	High	39.182 5.52e-169,LNS2|PF08235.13|1.2e-101,Lipin_N|PF04571.14|5.6e-41,Lipin_mid|PF16876.5|5.4e-32,Lipin_mid|PF16876.5|1.4e+04,WRNPLPNID|PF15017.6|1.8e+04,WRNPLPNID|PF15017.6|8.7e+03,WRNPLPNID|PF15017.6|1.8e+04,WRNPLPNID|PF15017.6|4.1e-05,PAPA-1|PF04795.12|8.6e+03,PAPA-1|PF04795.12|0.012,CBM-like|PF14683.6|0.11,MitMem_reg|PF13012.6|0.41 OFAVBQ_DN224556_c5_g5_i1:973-3702(-)	0.077	0	2	2	2	2	1	909	101.7	5.26	0	2																Low	Not Found	Low	Low	Low	Low	Low	Low
OFAVBQ_DN202461_c0_g1_i2.p1	type:complete	(-),score=166.11,TRPC4_RAT	High	23.554 9.62e-16,Ion_trans|PF00520.31|4.9e+02,Ion_trans|PF00520.31|2.9e-12,VWA|PF00092.28|2.4e-06,DUF16|PF01519.16|1.6e+04,DUF16|PF01519.16|4.8e+03,DUF16|PF01519.16|0.0012,DUF378|PF04070.12|0.067,DUF1664|PF07889.12|2.5e+03,DUF1664|PF07889.12|0.57,NPV_P10|PF05531.12|1.8e+04,NPV_P10|PF05531.12|6.7e+03,NPV_P10|PF05531.12|0.81 OFAVBQ_DN202461_c0_g1_i2:1306-4572(-)	0.075	0	1	2	6	2	1	1088	124	7.17	0	2																Low	Low	Low	Low	Low	Low	Low	Low
OFAVBQ_DN224409_c2_g1_i2.p1	type:3prime_partial	(-),score=100.74,POL4_DROME	High	31.023 2.84e-36,RVT_1|PF00078.27|7.2e-16,Asp_protease_2|PF13650.6|0.17,gag-asp_proteas|PF13975.6|0.37 OFAVBQ_DN224409_c2_g1_i2:1-2256(-)	0.073	0	2	2	2	2	1	752	83.9	8.41	0	2																Low	Low	Low	Low	Low	Low	Low	Low
OFAVBQ_DN207318_c8_g1_i6.p1	type:complete	(-),score=77.26,IRF8_HUMAN	High	53.333 1.68e-29,IRF8_HUMAN|30.864|1.79e-06,IRF|PF00605.17|8.3e-35,IRF-3|PF10401.9|8.8e+03,IRF-3|PF10401.9|1.2e-19,PAC3|PF10178.9|0.3 OFAVBQ_DN207318_c8_g1_i6:2187-3938(-)	0.074	0	2	1	3	1	1	583	65.8	6.33	0	1	0.01	1.447	1.352	1.116	1.329	1.285	1.112	92.6		134	125.2	103.3	123	119	102.9	Low	Not Found	Low	Low	Low	Low	Low	Low
OFAVBQ_DN225253_c10_g1_i4.p1	type:3prime_partial	(-),score=120.06,PATS1_DICDI	High	22.328 3.43e-19,COR|PF16095.5|1.7e-26,Roc|PF08477.13|5.9e-05,Roc|PF08477.13|1.9e-06,Ras|PF00071.22|16,Ras|PF00071.22|12,PduV-EutP|PF10662.9|0.31,AAA_24|PF13479.6|0.38,AAA_24|PF13479.6|4.3e+03 OFAVBQ_DN225253_c10_g1_i4:1-2349(-)	0.073	0	2	2	2	2	1	783	88.7	5.5	0	2	0.01	1.145	0.973	1.24	1.292	1.73	1.37	91.4		104.7	88.9	113.4	118.1	158.2	125.2	Low	Low	Low	Low	Low	Low	Low	Low
OFAVBQ_DN215319_c0_g1_i2.p1	type:complete	(-),score=136.22,CA2D3_RAT	High	26.131 1.94e-55,VWA_N|PF08399.11|1.3e-19,VWA_N|PF08399.11|0.00055,VWA|PF00092.28|1.8e-11,dCache_1|PF02743.18|1.2e+02,dCache_1|PF02743.18|5.6e-10,VWA_2|PF13519.6|2.5e-09,VWA_3|PF13768.6|5e-06,CobT_C|PF11775.8|0.081 OFAVBQ_DN215319_c0_g1_i2:2995-5397(-)	0.073	0	2	2	2	2	1	800	90.3	5.94	0	2																Low	Low	Low	Low	Low	Low	Low	Low
OFAVBQ_DN214225_c3_g12_i1.p1	type:internal	(-),score=42.25,LRR_4	High	PF12799.7 5.9e+02,LRR_4|PF12799.7|54,LRR_4|PF12799.7|1.3e+03,LRR_4|PF12799.7|9.3e+03,LRR_4|PF12799.7|2.7e+03,LRR_4|PF12799.7|2,LRR_4|PF12799.7|2.8,LRR_8|PF13855.6|5.2e+02,LRR_8|PF13855.6|3.6e+02,LRR_8|PF13855.6|3.1e+03,LRR_8|PF13855.6|0.44 OFAVBQ_DN214225_c3_g12_i1:1-939(-)	0.073	0	11	1	1	1	1	313	34	6.93	0	1																Low	Not Found	Low	Low	Low	Low	Low	Low
OFAVBQ_DN174246_c0_g2_i1.p5			High	OFAVBQ_DN174246_c0_g2~~OFAVBQ_DN174246_c0_g2_i1.p5 ORF type:complete len:95 (-),score=3.79 OFAVBQ_DN174246_c0_g2_i1:15-299(-)	0.073	0	13	1	1	1	1	94	10.8	7.59	0	1																Low	Low	Low	Low	Low	Low	Low	Low
OFAVBQ_DN217013_c2_g1_i5.p1	type:complete	(-),score=135.99,UBP1_RAT	High	31.707 2.10e-47,UBP1_RAT|29.388|1.56e-15,UCH|PF00443.29|2.9e-36,UCH|PF00443.29|0.17,UCH_1|PF13423.6|3.8e-16,UCH_1|PF13423.6|4.9e+03,UCH_1|PF13423.6|7.9e+02,DUF4709|PF15821.5|3.1e+02,DUF4709|PF15821.5|0.014 OFAVBQ_DN217013_c2_g1_i5:347-2419(-)	0.073	0	1	1	1	1	1	690	77.5	6.61	0	1																Low	Low	Low	Low	Low	Low	Low	Low
OFAVBQ_DN219816_c0_g3_i2.p1	type:complete	(-),score=28.70,MOCS1_HUMAN	High	65.455 6.55e-70,Radical_SAM|PF04055.21|2.5e-23,Fer4_12|PF13353.6|7.1e-10,Fer4_14|PF13394.6|5e+02,Fer4_14|PF13394.6|1.9e-05 OFAVBQ_DN219816_c0_g3_i2:3017-3637(-)	0.073	0	4	1	1	1	1	206	23.7	9.45	0	1																Low	Low	Low	Low	Low	Low	Low	Low
OFAVBQ_DN195932_c0_g1_i2.p1	type:complete	(-),score=9.29,SSPO_HUMAN	High	37.838 9.97e-10,TSP_1|PF00090.19|7.3e+02,TSP_1|PF00090.19|0.0044,TSP_1|PF00090.19|0.0042 OFAVBQ_DN195932_c0_g1_i2:748-1266(-)	0.073	0	7	2	2	2	1	172	19	10.59	0	2																Low	Not Found	Low	Low	Low	Low	Low	Low
OFAVBQ_DN216162_c0_g2_i1.p2			High	OFAVBQ_DN216162_c0_g2~~OFAVBQ_DN216162_c0_g2_i1.p2 ORF type:complete len:72 (-),score=0.20 OFAVBQ_DN216162_c0_g2_i1:34-249(-)	0.074	0	10	1	1	1	1	71	8.5	9.83	0	1																Low	Not Found	Low	Low	Low	Low	Low	Low
OFAVBQ_DN84582_c0_g1_i1.p1			High	OFAVBQ_DN84582_c0_g1~~OFAVBQ_DN84582_c0_g1_i1.p1 ORF type:5prime_partial len:83 (-),score=9.43 OFAVBQ_DN84582_c0_g1_i1:69-317(-)	0.075	0	7	1	1	1	1	82	9.8	8.19	0	1																Low	Low	Low	Low	Low	Low	Low	Low
OFAVBQ_DN218982_c1_g1_i1.p1	type:3prime_partial	(-),score=40.59,TPR_2	High	PF07719.17 2,TPR_2|PF07719.17|1.4e+03,TPR_2|PF07719.17|2,TPR_2|PF07719.17|7.8e-05,TPR_1|PF00515.28|85,TPR_1|PF00515.28|5.2e+03,TPR_1|PF00515.28|2.2e+03,TPR_1|PF00515.28|3.5,TPR_1|PF00515.28|0.00023,TPR_16|PF13432.6|6.8,TPR_16|PF13432.6|1.9e+03,TPR_16|PF13432.6|0.0053,TPR_6|PF13174.6|3e+02,TPR_6|PF13174.6|6.5e+02,TPR_6|PF13174.6|5e+03,TPR_6|PF13174.6|3.2e+03,TPR_6|PF13174.6|0.00032,TPR_19|PF14559.…	0.076	0	2	1	1	1	1	327	37.8	8.65	0	1																Low	Not Found	Low	Low	Low	Low	Low	Not Found
OFAVBQ_DN319711_c0_g1_i1.p1	type:internal	(-),score=1.81,DUF5310	High	PF17237.2 0.061 OFAVBQ_DN319711_c0_g1_i1:2-280(-)	0.076	0	8	1	1	1	1	93	10.8	10.42	0	1	0.953	1.01	1.298	1.012	1.04	0.783	1.464	93.5	89	94.4	121.3	94.6	97.2	73.2	136.8	Low	Low	Low	Low	Low	Low	Low	Low
OFAVBQ_DN213589_c0_g1_i1.p1	type:complete	(-),score=100.72,VMP_NEMVE	High	42.276 7.50e-54,VMP_NEMVE|38.261|1.16e-43,Astacin|PF01400.24|9.8e-62,Astacin|PF01400.24|6.6e-54,Peptidase_M10|PF00413.24|1.2e+02,Peptidase_M10|PF00413.24|5.5,Peptidase_M10|PF00413.24|5.3e+03,Peptidase_M10|PF00413.24|7.2,Peptidase_M10|PF00413.24|9.8,Reprolysin_4|PF13583.6|1,Reprolysin_4|PF13583.6|53,Peptidase_M57|PF12388.8|5.2,Peptidase_M57|PF12388.8|7.3,ShK|PF01549.24|0.064,Peptidase_M66|PF10462.…	0.076	0	1	1	1	1	1	823	94	7.56	0	1																Low	Not Found	Low	Low	Low	Low	Low	Low
OFAVBQ_DN212674_c5_g1_i1.p2			High	OFAVBQ_DN212674_c5_g1~~OFAVBQ_DN212674_c5_g1_i1.p2 ORF type:internal len:80 (-),score=17.01 OFAVBQ_DN212674_c5_g1_i1:3-239(-)	0.076	0	8	1	1	1	1	79	8.9	5.27	0	1																Low	Low	Low	Low	Low	Low	Low	Low
OFAVBQ_DN201159_c4_g1_i1.p1	type:complete	(-),score=149.76,COLA1_HUMAN	High	25.628 2.20e-12,VWA|PF00092.28|3.9e-18,ShK|PF01549.24|0.0012,VWA_2|PF13519.6|0.01 OFAVBQ_DN201159_c4_g1_i1:398-3619(-)	0.076	0	1	1	1	1	1	1073	113.1	8.97	0	1																Low	Not Found	Low	Low	Low	Low	Low	Low
OFAVBQ_DN218968_c3_g3_i2.p1	type:complete	(-),score=126.56,MRE11_CHICK	High	40.927 1.97e-110,Mre11_DNA_bind|PF04152.14|2.1e-47,Mre11_DNA_bind|PF04152.14|2.1e+03,Mre11_DNA_bind|PF04152.14|6.9e+03,Pinin_SDK_N|PF04697.13|1.8e+04,Pinin_SDK_N|PF04697.13|2.2e+02,Pinin_SDK_N|PF04697.13|0.00016,Pinin_SDK_N|PF04697.13|9.8e+02 OFAVBQ_DN218968_c3_g3_i2:316-1815(-)	0.076	0	4	2	3	2	1	499	56.8	6.39	0	2																Low	Low	Low	Low	Low	Low	Low	Low
OFAVBQ_DN219787_c0_g1_i1.p2	type:complete	(-),score=16.52,Collagen	High	PF01391.18 0.00028 OFAVBQ_DN219787_c0_g1_i1:2082-2540(-)	0.076	0	4	1	1	1	1	152	17.5	9.79	0	1																Low	Low	Low	Low	Low	Low	Low	Low
OFAVBQ_DN37441_c0_g1_i1.p1	type:internal	(+),score=6.53,AAA_30	High	PF13604.6 2.2e-05,AAA_19|PF13245.6|4.7e-05,PIF1|PF05970.14|5.6e-05,RNA_helicase|PF00910.22|0.0011,AAA_16|PF13191.6|0.012,Viral_helicase1|PF01443.18|0.038,Zeta_toxin|PF06414.12|0.056,AFG1_ATPase|PF03969.16|0.094,RsgA_GTPase|PF03193.16|0.1,NACHT|PF05729.12|0.13,Bac_DnaA|PF00308.18|0.16,IstB_IS21|PF01695.17|0.18,AAA_11|PF13086.6|0.17,AAA_22|PF13401.6|0.19 OFAVBQ_DN37441_c0_g1_i1:3-266(+)	0.075	0	7	1	2	1	1	88	9.6	9.74	0	1																Low	Low	Low	Low	Low	Low	Low	Low
OFAVBQ_DN212736_c2_g2_i1.p1	type:internal	(-),score=26.31,COLL2_MIMIV	High	53.097 6.56e-16,COLL2_MIMIV|52.885|1.36e-15,COLL2_MIMIV|50.000|5.30e-15,COLL2_MIMIV|52.885|1.32e-14,COLL2_MIMIV|50.000|1.64e-14,COLL2_MIMIV|51.887|3.14e-14,COLL2_MIMIV|47.414|4.63e-14,COLL2_MIMIV|47.321|1.93e-13,COLL2_MIMIV|45.455|1.97e-13,COLL2_MIMIV|46.018|3.33e-13,COLL2_MIMIV|47.222|3.63e-13,COLL2_MIMIV|45.133|1.39e-12,COLL2_MIMIV|43.443|1.59e-12,COLL2_MIMIV|45.528|2.03e-12,COLL2_MIMIV|47.170|…	0.169	0	9	2	6	2	1	112	10.7	10.54	0	2																Low	Low	Low	Low	Low	Low	Low	Low
OFAVBQ_DN213070_c3_g1_i2.p1	type:3prime_partial	(+),score=27.02,gag-asp_proteas	High	PF13975.6 2.2e+03,gag-asp_proteas|PF13975.6|5e-07,Asp_protease_2|PF13650.6|9.5e-05,Asp_protease|PF09668.10|0.015 OFAVBQ_DN213070_c3_g1_i2:1069-1593(+)	0.043	0	5	1	2	1	1	175	19.2	6.55	0	1																Low	Not Found	Low	Low	Low	Low	Low	Low
OFAVBQ_DN290179_c0_g1_i1.p1	type:3prime_partial	(-),score=17.24,RL14_PIG	High	42.857 7.22e-35,Ribosomal_L14e|PF01929.17|9.9e-26,CALM_bind|PF16025.5|0.066 OFAVBQ_DN290179_c0_g1_i1:2-406(-)	0.17	0	12	1	1	1	1	135	15.7	9.99	0	1																Not Found	Not Found	Low	Low	Low	Low	Not Found	Low
OFAVBQ_DN221978_c1_g2_i1.p1	type:internal	(+),score=5.52,RTJK_DROME	High	28.000 2.90e-07,RVT_1|PF00078.27|3e-15 OFAVBQ_DN221978_c1_g2_i1:2-364(+)	0.058	0	7	1	1	1	1	121	13.4	6.65	0	1	1.036	2.151	0.956	0.835	0.798	0.726	0.732	97.2	100.6	209	92.9	81.1	77.5	70.5	71.1	Low	Low	Low	Low	Low	Low	Low	Low
OFAVBQ_DN213799_c2_g6_i2.p1	type:complete	(-),score=10.25,AA2AR_RAT	High	26.349 3.01e-13,7tm_1|PF00001.21|3.3e-24,7tm_4|PF13853.6|1.2e-06,7tm_4|PF13853.6|5e+02,7TM_GPCR_Srx|PF10328.9|0.006,7TM_GPCR_Srx|PF10328.9|25,QueT|PF06177.11|0.37,QueT|PF06177.11|8.5e+02,QueT|PF06177.11|1.2e+02 OFAVBQ_DN213799_c2_g6_i2:316-1302(-)	0.058	0	9	1	2	1	1	328	37.5	9.58	0	1																Low	Not Found	Low	Low	Low	Low	Low	Low
OFAVBQ_DN215588_c4_g1_i1.p1	type:internal	(-),score=14.98,F5_F8_type_C	High	PF00754.25 4.9e-05 OFAVBQ_DN215588_c4_g1_i1:1-312(-)	0.058	0	7	1	1	1	1	104	11.7	7.85	0	1																Low	Not Found	Low	Low	Low	Low	Low	Low
OFAVBQ_DN220059_c2_g2_i1.p1	type:3prime_partial	(-),score=32.07,ZN726_HUMAN	High	44.802 3.56e-103,ZN726_HUMAN|44.474|6.44e-98,ZN726_HUMAN|43.236|4.47e-96,ZN726_HUMAN|43.343|1.70e-85,ZN726_HUMAN|39.894|7.43e-79,ZN726_HUMAN|33.562|3.56e-15,zf-H2C2_2|PF13465.6|4.3,zf-H2C2_2|PF13465.6|0.0041,zf-H2C2_2|PF13465.6|3.4e-07,zf-H2C2_2|PF13465.6|1.5e-07,zf-H2C2_2|PF13465.6|2.6e-07,zf-H2C2_2|PF13465.6|1.1e-06,zf-H2C2_2|PF13465.6|53,zf-H2C2_2|PF13465.6|3.4e-05,zf-H2C2_2|PF13465.6|9.3e-05,…	0.058	0	2	1	1	1	1	386	45	9.31	0	1																Low	Not Found	Low	Low	Low	Low	Low	Low
OFAVBQ_DN207711_c7_g1_i2.p1	type:complete	(-),score=81.65,ANKS3_HUMAN	High	33.553 3.92e-21,SAM_1|PF00536.30|6.3e-15,SAM_2|PF07647.17|2e-10,SAM_2|PF07647.17|1.7e+03,Lzipper-MIP1|PF14389.6|3.2e+03,Lzipper-MIP1|PF14389.6|0.053,Lzipper-MIP1|PF14389.6|3.7e+03,FOXP-CC|PF16159.5|2.5e+03,FOXP-CC|PF16159.5|1.3,Uso1_p115_C|PF04871.13|86,Uso1_p115_C|PF04871.13|11 OFAVBQ_DN207711_c7_g1_i2:682-1857(-)	0.059	0	2	1	1	1	1	391	43.9	7.31	0	1																Low	Not Found	Low	Low	Low	Not Found	Low	Low
OFAVBQ_DN200396_c0_g1_i7.p1	type:complete	(-),score=66.53,PACN1_HUMAN	High	37.668 2.06e-39,SUIM_assoc|PF16619.5|0.043,TPR_10|PF13374.6|15,TPR_10|PF13374.6|2.4e+02,TPR_10|PF13374.6|1.4e+03 OFAVBQ_DN200396_c0_g1_i7:1762-2469(-)	0.059	0	3	1	2	1	1	235	27.2	7.94	0	1																Low	Low	Low	Low	Low	Low	Low	Low
OFAVBQ_DN193502_c0_g1_i1.p1	type:complete	(-),score=114.89,LGR6_MOUSE	High	32.068 2.27e-23,LGR6_MOUSE|36.220|1.13e-12,LGR6_MOUSE|24.324|7.41e-08,LGR6_MOUSE|24.231|2.54e-07,LGR6_MOUSE|27.434|2.51e-06,LRR_8|PF13855.6|7.9e-08,LRR_8|PF13855.6|5.6e-14,LRR_8|PF13855.6|5.5e-09,LRR_8|PF13855.6|7.9e-12,LRR_8|PF13855.6|3e-09,LRR_4|PF12799.7|1.4e+02,LRR_4|PF12799.7|0.00011,LRR_4|PF12799.7|7e-05,LRR_4|PF12799.7|0.00071,LRR_4|PF12799.7|0.028,LRR_4|PF12799.7|0.00024,LRR_5|PF13306.6|0…	0.059	0	2	2	5	2	1	1140	127.4	7.42	0	2																Low	Low	Low	Low	Low	Low	Low	Low
OFAVBQ_DN198269_c0_g1_i1.p1	type:complete	(-),score=25.83,ALP1_ARATH	High	33.108 1.88e-44,DDE_Tnp_4|PF13359.6|3.1e-38,Plant_tran|PF04827.14|1.6e-14,DDE_Tnp_1|PF01609.21|0.0024,DDE_Tnp_1_2|PF13586.6|0.071 OFAVBQ_DN198269_c0_g1_i1:531-1430(-)	0.059	0	3	1	1	1	1	299	33.8	6.99	0	1																Low	Low	Low	Low	Low	Low	Low	Low
OFAVBQ_DN220613_c1_g1_i1.p3			High	OFAVBQ_DN220613_c1_g1~~OFAVBQ_DN220613_c1_g1_i1.p3 ORF type:complete len:99 (+),score=3.67 OFAVBQ_DN220613_c1_g1_i1:6048-6344(+)	0.058	0	11	1	1	1	1	98	11.6	10.68	0	1																Not Found	Not Found	Low	Low	Not Found	Not Found	Low	Low
OFAVBQ_DN196586_c5_g1_i4.p2			High	OFAVBQ_DN196586_c5_g1~~OFAVBQ_DN196586_c5_g1_i4.p2 ORF type:complete len:98 (-),score=2.59 OFAVBQ_DN196586_c5_g1_i4:828-1121(-)	0.059	0	9	1	7	1	1	97	10.9	9.79	0	1																Low	Low	Low	Low	Low	Low	Low	Low
OFAVBQ_DN215300_c0_g1_i1.p1	type:complete	(-),score=139.49,CUL1_PONAB	High	79.587 0.0,Cullin|PF00888.22|3.5e-199,Cullin|PF00888.22|2.1e+03,Cullin_Nedd8|PF10557.9|1.4e+03,Cullin_Nedd8|PF10557.9|8.5e-27,Clr5|PF14420.6|4.9,Clr5|PF14420.6|1.6e+02,DUF4355|PF14265.6|0.8,DUF4355|PF14265.6|5.4e+02 OFAVBQ_DN215300_c0_g1_i1:1247-3559(-)	0.058	0	4	2	2	2	1	770	89.2	7.69	0	2																Not Found	Low	Low	Low	Not Found	Not Found	Low	Low
OFAVBQ_DN216082_c1_g2_i1.p1	type:complete	(-),score=61.44,RWD	High	PF05773.22 8.5e-05,RWD|PF05773.22|8.7,zf-C3HC4|PF00097.25|2.4e-05,zf-RING_2|PF13639.6|1.7e+03,zf-RING_2|PF13639.6|4.6e-05,zf-rbx1|PF12678.7|1.1e+03,zf-rbx1|PF12678.7|0.00016,zf-ANAPC11|PF12861.7|0.022,zf-RING_5|PF14634.6|3.7e+02,zf-RING_5|PF14634.6|0.0081,zf-C3HC4_3|PF13920.6|2.4e+02,zf-C3HC4_3|PF13920.6|0.026,zf-ACC|PF17848.1|1.1e+04,zf-ACC|PF17848.1|0.065,zf-RING_UBOX|PF13445.6|0.15,zf-RING_UBO…	0.058	0	7	3	8	3	1	340	38.8	8.22	0	3	0.967	1.086	0.958	0.971	1.525	1.449	1.887	81.3	78.6	88.3	77.9	78.9	124	117.8	153.3	Low	Low	Low	Low	Low	Low	Low	Low
OFAVBQ_DN210708_c3_g2_i2.p1	type:complete	(-),score=64.34,ODPB_BOVIN	High	69.444 0.0,Transket_pyr|PF02779.24|7.4e-49,Transketolase_C|PF02780.20|1.6e+03,Transketolase_C|PF02780.20|1.1e-37,PFOR_II|PF17147.4|2.2e+03,PFOR_II|PF17147.4|0.1 OFAVBQ_DN210708_c3_g2_i2:632-1717(-)	0.058	0	2	1	1	1	1	361	38.9	5.69	0	1																Low	Not Found	Low	Low	Low	Low	Low	Low
OFAVBQ_DN212415_c2_g1_i13.p2	type:complete	(-),score=19.27,NELFE_DROVI	High	45.283 6.80e-08,RRM_1|PF00076.22|2.5e-06,RRM_5|PF13893.6|5.2e-05,RRM_3|PF08777.11|0.007,Limkain-b1|PF11608.8|0.016,Nup35_RRM_2|PF14605.6|0.2 OFAVBQ_DN212415_c2_g1_i13:615-977(-)	0.058	0	7	1	1	1	1	120	13.5	8.97	0	1																Low	Not Found	Low	Low	Low	Low	Low	Low
OFAVBQ_DN206342_c2_g1_i1.p1	type:complete	(-),score=279.72,TMF1_HUMAN	High	41.275 9.16e-102,TMF1_HUMAN|38.938|3.11e-06,TMF_DNA_bd|PF12329.8|1.1e+04,TMF_DNA_bd|PF12329.8|5.8e+03,TMF_DNA_bd|PF12329.8|2e+02,TMF_DNA_bd|PF12329.8|69,TMF_DNA_bd|PF12329.8|3.3e+02,TMF_DNA_bd|PF12329.8|3.7e-16,TMF_DNA_bd|PF12329.8|0.0011,TMF_DNA_bd|PF12329.8|5.8e+02,TMF_DNA_bd|PF12329.8|14,TMF_DNA_bd|PF12329.8|1.4e+03,TMF_DNA_bd|PF12329.8|5.6e+03,SlyX|PF04102.12|1.1e+03,SlyX|PF04102.12|2.8e+03,S…	0.058	0	1	1	2	1	1	1147	128.6	5.35	0	1																Low	Not Found	Low	Low	Low	Low	Low	Low
OFAVBQ_DN216187_c0_g1_i2.p2	type:complete	(-),score=42.09,SCN60_DROME	High	48.052 3.75e-116,SCN60_DROME|24.000|1.21e-14,SCN60_DROME|31.902|3.83e-09,Ion_trans|PF00520.31|2.2e-48,PKD_channel|PF08016.12|0.018,PKD_channel|PF08016.12|7e-08,GPHH|PF16905.5|0.0022 OFAVBQ_DN216187_c0_g1_i2:191-1654(-)	0.058	0	3	2	2	2	1	487	55.9	9.2	0	2																Low	Not Found	Low	Low	Low	Low	Low	Low
OFAVBQ_DN214376_c0_g1_i10.p1			High	OFAVBQ_DN214376_c0_g1~~OFAVBQ_DN214376_c0_g1_i10.p1 ORF type:internal len:221 (-),score=23.94 OFAVBQ_DN214376_c0_g1_i10:2-661(-)	0.058	0	5	1	2	1	1	220	26	9.04	0	1																Low	Not Found	Low	Low	Low	Low	Low	Low
OFAVBQ_DN215235_c0_g1_i11.p1	type:5prime_partial	(-),score=107.79,LIN41_DANRE	High	28.920 7.45e-105,LIN41_DANRE|34.595|3.61e-24,LIN41_DANRE|31.844|3.18e-19,LIN41_DANRE|39.362|2.32e-13,NHL|PF01436.21|9.7e-07,NHL|PF01436.21|3.8e-07,NHL|PF01436.21|0.0011,NHL|PF01436.21|7.8e+02,NHL|PF01436.21|2.2e-06,NHL|PF01436.21|0.018,Filamin|PF00630.19|5.5e-17,DUF5128|PF17170.4|2.1e+03,DUF5128|PF17170.4|0.0012,DUF5128|PF17170.4|1.9,DUF5128|PF17170.4|3.6e-05,zf-B_box|PF00643.24|6.9e+03,zf-B_box|…	0.058	0	1	1	2	1	1	723	81.3	7.3	0	1																Low	Not Found	Low	Low	Low	Low	Low	Low
OFAVBQ_DN321853_c0_g1_i1.p1	type:internal	(-),score=25.59,CCNB2_XENLA	High	37.895 1.36e-32,Cyclin_N|PF00134.23|1.4e-28,Cyclin_C|PF02984.19|1.4e+03,Cyclin_C|PF02984.19|2e-05 OFAVBQ_DN321853_c0_g1_i1:2-1048(-)	0.059	0	7	3	3	3	1	349	40	9.36	0	3	1.243	1.05	1.219	1.218	0.704	1.225	0.778	94.8	117.9	99.6	115.6	115.5	66.8	116.2	73.8	Low	Low	Low	Low	Low	Low	Low	Low
OFAVBQ_DN38394_c0_g1_i1.p1	type:3prime_partial	(-),score=18.70,GAAP_VACCL	High	35.165 2.01e-24,Bax1-I|PF01027.20|4e-25 OFAVBQ_DN38394_c0_g1_i1:3-551(-)	0.058	0	5	1	2	1	1	183	20.1	6.52	0	1																Low	Low	Low	Low	Low	Low	Low	Low
OFAVBQ_DN187285_c0_g1_i3.p1	type:3prime_partial	(-),score=44.06,GBP6_PONAB	High	36.559 1.64e-10,GBP|PF02263.19|3.1e+03,GBP|PF02263.19|2.3e-13 OFAVBQ_DN187285_c0_g1_i3:3-821(-)	0.057	0	3	1	1	1	1	273	31.8	9.19	0	1																Low	Not Found	Low	Low	Low	Low	Low	Low
OFAVBQ_DN225343_c0_g1_i1.p1	type:complete	(-),score=874.58,CO6A6_HUMAN	High	24.791 1.02e-68,CO6A6_HUMAN|22.204|8.51e-51,CO6A6_HUMAN|22.231|6.07e-48,CO6A6_HUMAN|22.540|1.85e-47,CO6A6_HUMAN|23.077|2.03e-46,CO6A6_HUMAN|21.513|2.63e-46,CO6A6_HUMAN|21.541|6.04e-41,CO6A6_HUMAN|21.217|6.08e-37,CO6A6_HUMAN|23.077|2.00e-36,CO6A6_HUMAN|25.953|9.07e-36,CO6A6_HUMAN|20.944|3.93e-34,CO6A6_HUMAN|20.346|7.66e-33,CO6A6_HUMAN|19.699|6.45e-27,CO6A6_HUMAN|30.270|1.21e-11,VWA|PF00092.28|6e-2…	0.057	0	1	5	7	5	1	6148	676.6	8.37	0	5																Low	Low	Low	Low	Low	Low	Low	Low
OFAVBQ_DN200608_c5_g6_i1.p1	type:complete	(-),score=61.33,MINP1_CHICK	High	29.817 2.15e-50,His_Phos_2|PF00328.22|3.9e-31 OFAVBQ_DN200608_c5_g6_i1:511-1929(-)	0.057	0	2	1	1	1	1	472	53.8	7.61	0	1																Low	Not Found	Low	Low	Low	Low	Low	Not Found
OFAVBQ_DN220107_c0_g2_i1.p1	type:3prime_partial	(-),score=20.92,Gon7	High	PF08738.10 0.0015,GNT-I|PF03071.15|0.0056,NIL|PF09383.10|5.1e+02,NIL|PF09383.10|0.79 OFAVBQ_DN220107_c0_g2_i1:3-308(-)	0.057	0	9	1	2	1	1	102	11.2	9.07	0	1	1.804	2.51	1.38	0.426	0.97	2.205	1.129	70	126.3	175.8	96.6	29.8	68	154.4	79.1	Low	Low	Low	Low	Low	Low	Low	Low
OFAVBQ_DN107698_c0_g1_i1.p1	type:internal	(-),score=20.40,RS12_DROME	High	52.326 5.16e-27,Ribosomal_L7Ae|PF01248.26|4.4e-22,SpoU_sub_bind|PF08032.12|0.18 OFAVBQ_DN107698_c0_g1_i1:2-262(-)	0.057	0	11	1	2	1	1	87	9.9	9.19	0	1																Low	Not Found	Low	Low	Low	Low	Low	Low
OFAVBQ_DN165875_c2_g1_i1.p1	type:internal	(+),score=19.69,Chorion_3	High	PF05387.11 1.3 OFAVBQ_DN165875_c2_g1_i1:1-672(+)	0.057	0	4	1	5	1	1	224	25.9	10.59	0	1																Low	Low	Low	Low	Low	Low	Low	Low
OFAVBQ_DN196202_c0_g1_i1.p1	type:complete	(-),score=53.39,ANR63_MOUSE	High	32.847 1.20e-14,Ank_2|PF12796.7|1.3e-06,Ank_2|PF12796.7|1.1e-08,Ank_4|PF13637.6|44,Ank_4|PF13637.6|0.18,Ank_4|PF13637.6|6.9e-05,Ank_4|PF13637.6|0.00038,Ank_5|PF13857.6|10,Ank_5|PF13857.6|0.25,Ank_5|PF13857.6|0.47,Ank_5|PF13857.6|0.04,Ank|PF00023.30|0.41,Ank|PF00023.30|1.1e+02,Ank|PF00023.30|0.21,Ank|PF00023.30|63,Ank|PF00023.30|0.92,Ank|PF00023.30|1.8e+04,Ank_3|PF13606.6|3.3,Ank_3|PF13606.6|2.9,A…	0.057	0	2	1	1	1	1	394	43.9	9.58	0	1	0.635	0.565	1.416	0.888	1.726	1.051	1.094	95.5	60.6	53.9	135.3	84.8	164.9	100.4	104.5	Low	Low	Low	Low	Low	Low	Low	Low
OFAVBQ_DN216906_c1_g2_i3.p1	type:complete	(-),score=65.39,KLHL1_MOUSE	High	32.203 4.95e-54,KLHL1_MOUSE|33.161|1.31e-25,Kelch_1|PF01344.25|0.73,Kelch_1|PF01344.25|1.1e-11,Kelch_1|PF01344.25|6.4e-11,Kelch_1|PF01344.25|1.4e-11,Kelch_1|PF01344.25|0.0043,Kelch_6|PF13964.6|68,Kelch_6|PF13964.6|0.00085,Kelch_6|PF13964.6|9e-06,Kelch_6|PF13964.6|2.1e-06,Kelch_6|PF13964.6|0.013,Kelch_6|PF13964.6|1.1e+04,Kelch_2|PF07646.15|3.6e+02,Kelch_2|PF07646.15|0.00067,Kelch_2|PF07646.15|0.01…	0.057	0	2	1	1	1	1	427	47.5	6.39	0	1																Low	Low	Low	Low	Low	Low	Low	Low
OFAVBQ_DN218847_c0_g2_i2.p5			High	OFAVBQ_DN218847_c0_g2~~OFAVBQ_DN218847_c0_g2_i2.p5 ORF type:complete len:84 (+),score=2.48 OFAVBQ_DN218847_c0_g2_i2:272-523(+)	0.057	0	7	1	1	1	1	83	9.6	8.76	0	1																Low	Low	Low	Low	Low	Low	Low	Low
OFAVBQ_DN87235_c0_g1_i1.p1	type:complete	(-),score=10.24,RL37A_DICDI	High	74.725 2.60e-45,Ribosomal_L37ae|PF01780.19|4.7e-39,zf-RING_13|PF17977.1|0.0012,Zn_Tnp_IS1595|PF12760.7|0.0043,DUF1451|PF07295.11|0.056,zf-BED|PF02892.15|0.3,zf-BED|PF02892.15|21,A2L_zn_ribbon|PF08792.10|0.84,A2L_zn_ribbon|PF08792.10|70,CarbpepA_inh|PF02977.15|3.8e+02,CarbpepA_inh|PF02977.15|0.095,Thymidylat_synt|PF00303.19|0.12,Zn-ribbon_8|PF09723.10|0.44,Zn_ribbon_SprT|PF17283.2|15,Zn_ribbon_Spr…	0.057	0	9	1	1	1	1	92	10.1	10.61	0	1																Low	Low	Low	Low	Low	Low	Low	Low
OFAVBQ_DN214198_c5_g1_i3.p1	type:complete	(-),score=52.97,DRC7_XENTR	High	53.061 1.02e-77,Transglut_core|PF01841.19|0.0014,DUF553|PF04473.12|0.033,DUF4337|PF14235.6|4.9 OFAVBQ_DN214198_c5_g1_i3:1356-2075(-)	0.057	0	3	1	1	1	1	239	27.4	7.9	0	1																Low	Low	Low	Low	Low	Low	Low	Low
OFAVBQ_DN205210_c2_g4_i1.p1	type:internal	(-),score=14.49,DUF4532	High	PF15046.6 0.17 OFAVBQ_DN205210_c2_g4_i1:2-262(-)	0.057	0	7	1	3	1	1	87	10.2	9.69	0	1																Low	Low	Low	Low	Low	Low	Low	Low
OFAVBQ_DN222890_c1_g2_i1.p1	type:internal	(-),score=213.74,LRRX1_DICDI	High	24.268 6.21e-10,LRRX1_DICDI|23.744|4.13e-08,LRRX1_DICDI|22.960|9.70e-06,HOOK|PF05622.12|1.8e+04,HOOK|PF05622.12|0.039,HOOK|PF05622.12|0.0019,HOOK|PF05622.12|2.4e+02,Sec34|PF04136.15|27,Sec34|PF04136.15|3.9,Sec34|PF04136.15|5e+02,Sec34|PF04136.15|7.4e+03,Sec34|PF04136.15|3.5e+03,Sec34|PF04136.15|11,Sec34|PF04136.15|0.013,Sec34|PF04136.15|46,Sec34|PF04136.15|0.93,Sec34|PF04136.15|2.6e+02,Sec34|PF04…	0.057	0	1	1	19	1	1	742	89.9	4.92	0	1																Low	Low	Low	Low	Low	Low	Low	Low
OFAVBQ_DN215282_c0_g1_i8.p1	type:complete	(-),score=115.35,PNKP_HUMAN	High	44.403 1.21e-156,PNK3P|PF08645.11|2.7e+03,PNK3P|PF08645.11|4.4e-54,FHA_2|PF17913.1|1.7e-27,AAA_33|PF13671.6|1.6e-06,AAA_33|PF13671.6|4e-07,KTI12|PF08433.10|4.6e+02,KTI12|PF08433.10|0.22,KTI12|PF08433.10|1.1,Zeta_toxin|PF06414.12|0.27,Zeta_toxin|PF06414.12|6.5,6PF2K|PF01591.18|1.4e+03,6PF2K|PF01591.18|0.081,6PF2K|PF01591.18|1.7e+02,DUF4217|PF13959.6|0.13,HAD_2|PF13419.6|5.1e+02,HAD_2|PF13419.6|9.9…	0.057	0	3	1	2	1	1	548	61.8	7.69	0	1																Low	Low	Low	Low	Low	Low	Low	Low
OFAVBQ_DN105805_c0_g1_i1.p1	type:internal	(+),score=5.01,Limkain-b1	High	PF11608.8 0.012,CofC|PF01983.16|0.091 OFAVBQ_DN105805_c0_g1_i1:3-233(+)	0.057	0	10	1	1	1	1	77	9.1	9.48	0	1																Low	Low	Low	Low	Low	Low	Low	Low
OFAVBQ_DN286064_c0_g1_i1.p1	type:complete	(-),score=76.97,NP1L1_BOVIN	High	50.318 2.40e-98,NAP|PF00956.18|2.7e-96,NAP|PF00956.18|1.8e+04,Pestivirus_E2|PF16329.5|4.4,Pestivirus_E2|PF16329.5|0.16 OFAVBQ_DN286064_c0_g1_i1:56-1165(-)	0.057	0	3	1	1	1	1	369	42.8	4.65	0	1	2.244	1.483	1.204	1.623	1.606	1.774	2.599	59.1	132.6	87.7	71.1	95.9	95	104.9	153.7	Low	Low	Low	Low	Low	Low	Low	Low
OFAVBQ_DN218252_c1_g1_i3.p1	type:complete	(-),score=24.26,SBDS_BOVIN	High	71.724 3.67e-66,SBDS_C|PF09377.10|2.1e-39 OFAVBQ_DN218252_c1_g1_i3:2133-2570(-)	0.056	0	6	1	2	1	1	145	16.7	6.07	0	1																Low	Low	Low	Low	Low	Low	Low	Low
OFAVBQ_DN100391_c0_g1_i1.p1	type:3prime_partial	(-),score=29.74,SPYA_RAT	High	50.526 3.63e-66,Aminotran_5|PF00266.19|1.1e-29,Cys_Met_Meta_PP|PF01053.20|0.00015,Aminotran_1_2|PF00155.21|0.0027,DUF5607|PF18355.1|0.031,DUF5607|PF18355.1|4.7e+03 OFAVBQ_DN100391_c0_g1_i1:2-571(-)	0.056	0	3	1	1	1	1	190	20.2	5.68	0	1																Low	Not Found	Low	Low	Low	Low	Low	Low
OFAVBQ_DN225119_c0_g1_i4.p1	type:complete	(+),score=237.49,TF26_SCHPO	High	24.694 1.10e-60,RT_RNaseH_2|PF17919.1|1.7e-21,RT_RNaseH|PF17917.1|4.5e-20,rve|PF00665.26|1.1e-15,Integrase_H2C2|PF17921.1|8.5e+02,Integrase_H2C2|PF17921.1|1.6e-14,RVT_1|PF00078.27|1.3e-12,zf-H2C2|PF09337.10|2.1e+03,zf-H2C2|PF09337.10|1.8e-06 OFAVBQ_DN225119_c0_g1_i4:38-4504(+)	0.057	0	3	4	8	4	1	1488	170.7	8.84	0	4																Low	Low	Low	Low	Low	Low	Low	Low
OFAVBQ_DN206298_c2_g1_i1.p1			High	OFAVBQ_DN206298_c2_g1~~OFAVBQ_DN206298_c2_g1_i1.p1 ORF type:3prime_partial len:112 (+),score=17.45 OFAVBQ_DN206298_c2_g1_i1:197-529(+)	0.056	0	9	1	1	1	1	111	12.5	9.83	0	1																Low	Not Found	Low	Low	Low	Low	Low	Low
OFAVBQ_DN215075_c4_g1_i1.p1			High	OFAVBQ_DN215075_c4_g1~~OFAVBQ_DN215075_c4_g1_i1.p1 ORF type:3prime_partial len:71 (-),score=1.12 OFAVBQ_DN215075_c4_g1_i1:3-212(-)	0.057	0	13	1	1	1	1	70	8	8.32	0	1																Low	Low	Low	Low	Low	Low	Low	Low
OFAVBQ_DN222535_c1_g2_i1.p3	type:complete	(-),score=-7.54,IRK	High	PF01007.20 1.1 OFAVBQ_DN222535_c1_g2_i1:3676-3912(-)	0.058	0	12	1	2	1	1	78	9.4	7.43	0	1																Low	Low	Low	Low	Low	Low	Low	Low
OFAVBQ_DN98989_c0_g1_i1.p1	type:5prime_partial	(-),score=26.71,ATP5H_DROME	High	43.558 1.05e-37,Mt_ATP-synt_D|PF05873.12|1.1e-46,ApoLp-III|PF07464.11|27,ApoLp-III|PF07464.11|0.85,PilJ|PF13675.6|0.057 OFAVBQ_DN98989_c0_g1_i1:13-546(-)	0.062	0	3	1	1	1	1	177	20.2	9.19	0	1																Low	Not Found	Low	Low	Low	Low	Low	Low
OFAVBQ_DN198208_c5_g1_i2.p1	type:complete	(-),score=94.94,MLP_ACRMI	High	35.749 3.84e-30,MLP_ACRMI|48.739|2.67e-27,MLP_ACRMI|43.421|2.41e-10,MLP_ACRMI|45.161|3.03e-10,MLP_ACRMI|42.647|7.52e-10,MLP_ACRMI|40.984|1.80e-08,MLP_ACRMI|45.000|3.97e-08,VWA|PF00092.28|9.3e-30,VWA|PF00092.28|2e-18,VWA|PF00092.28|1.8e-24,VWA_2|PF13519.6|1.5e-12,VWA_2|PF13519.6|2.3e-12,VWA_2|PF13519.6|1.2e-10,TSP_1|PF00090.19|9e-10,TSP_1|PF00090.19|6.8e-09,TSP_1|PF00090.19|3e-11,VWA_3|PF13768.6|5…	0.066	0	1	1	3	1	1	799	88.3	8.91	0	1																Low	Low	Low	Low	Low	Low	Low	Low
OFAVBQ_DN194201_c0_g1_i1.p1	type:internal	(-),score=110.83,Peptidase_A17	High	PF05380.13 5.8e-50,RVT_1|PF00078.27|0.00036,Asp_protease_2|PF13650.6|0.014,gag-asp_proteas|PF13975.6|0.37 OFAVBQ_DN194201_c0_g1_i1:1-2535(-)	0.066	0	5	3	5	3	1	845	95	7.97	0	3																Low	Not Found	Low	Low	Low	Low	Low	Low
OFAVBQ_DN223673_c5_g2_i1.p1	type:internal	(+),score=14.68,DUF3775	High	PF12616.8 0.11 OFAVBQ_DN223673_c5_g2_i1:2-217(+)	0.067	0	17	1	2	1	1	72	8	7.42	0	1																Not Found	Not Found	Not Found	Not Found	Not Found	Not Found	Not Found	Not Found
OFAVBQ_DN210747_c0_g1_i2.p1	type:complete	(-),score=79.32,CDC7_MOUSE	High	35.852 6.96e-94,Pkinase|PF00069.25|1.7e-24,Pkinase|PF00069.25|1.4e-10,Pkinase|PF00069.25|0.00029,Pkinase_Tyr|PF07714.17|4.5e-09,Pkinase_Tyr|PF07714.17|29,Pkinase_Tyr|PF07714.17|2.6e+02,APH|PF01636.23|0.14 OFAVBQ_DN210747_c0_g1_i2:773-2560(-)	0.068	0	4	2	7	2	1	595	66.2	8.54	0	2																Low	Low	Low	Low	Low	Low	Low	Low
OFAVBQ_DN182392_c1_g1_i1.p1	type:internal	(-),score=21.26,DUF4823	High	PF16105.5 0.072 OFAVBQ_DN182392_c1_g1_i1:1-273(-)	0.068	0	10	1	1	1	1	91	10.6	6.3	0	1																Low	Not Found	Low	Low	Low	Low	Low	Low
OFAVBQ_DN208460_c0_g1_i6.p1	type:complete	(-),score=57.22,EIF3M_NEMVE	High	54.647 1.01e-104,Cnd1|PF12717.7|4.7,Cnd1|PF12717.7|2.6,LuxT_C|PF18285.1|0.023 OFAVBQ_DN208460_c0_g1_i6:1633-2460(-)	0.068	0	3	1	3	1	1	275	31.3	4.72	0	1																Low	Low	Low	Low	Low	Low	Low	Low
OFAVBQ_DN209085_c0_g1_i2.p1	type:complete	(-),score=113.93,CC181_HUMAN	High	24.675 5.45e-12,KilA-N|PF04383.13|2e+03,KilA-N|PF04383.13|0.48 OFAVBQ_DN209085_c0_g1_i2:986-2323(-)	0.068	0	2	1	2	1	1	445	51.7	5.39	0	1																Low	Low	Low	Low	Low	Low	Low	Low
OFAVBQ_DN206091_c0_g1_i1.p1	type:5prime_partial	(-),score=18.45,OIT3_BOVIN	High	24.540 3.36e-06,Zona_pellucida|PF00100.23|6.6e+02,Zona_pellucida|PF00100.23|1.2e-15 OFAVBQ_DN206091_c0_g1_i1:881-1630(-)	0.068	0	5	1	1	1	1	249	28.2	7.71	0	1	1.064	0.79	0.703	1.108	0.551	0.62	0.431	127.7	135.8	100.8	89.8	141.4	70.4	79.2	55.1	Low	Low	Low	Low	Low	Low	Low	Low
OFAVBQ_DN204504_c3_g5_i1.p1			High	OFAVBQ_DN204504_c3_g5~~OFAVBQ_DN204504_c3_g5_i1.p1 ORF type:complete len:344 (-),score=77.63 OFAVBQ_DN204504_c3_g5_i1:833-1864(-)	0.068	0	2	1	3	1	1	343	39.6	4.94	0	1																Low	Low	Low	Low	Low	Low	Low	Low
OFAVBQ_DN217278_c2_g1_i2.p1	type:5prime_partial	(-),score=22.30,Death	High	PF00531.22 4.5e-12,DUF2436|PF10365.9|0.21 OFAVBQ_DN217278_c2_g1_i2:2085-2393(-)	0.066	0	7	1	2	1	1	102	11.8	6.79	0	1	0.01	0.697	1.244	1.01	0.594	0.701	0.512	138.9		96.8	172.8	140.3	82.5	97.4	71.2	Low	Not Found	Low	Low	Low	Low	Low	Low
OFAVBQ_DN200707_c6_g1_i2.p1	type:complete	(-),score=27.81,PQLC1_HUMAN	High	55.469 5.08e-99,PQ-loop|PF04193.14|6.4e-13,PQ-loop|PF04193.14|3.3e+03,PQ-loop|PF04193.14|1.7e-14,ER_lumen_recept|PF00810.18|0.028,ER_lumen_recept|PF00810.18|5.1 OFAVBQ_DN200707_c6_g1_i2:322-1101(-)	0.068	0	3	1	2	1	1	259	29.7	7.08	0	1	1.977	1.017	1.328	1.246	2.839	1.613	0.879	67.2	132.9	68.4	89.3	83.7	190.9	108.4	59.1	Low	Low	Low	Low	Low	Low	Low	Low
OFAVBQ_DN210884_c1_g3_i1.p1	type:complete	(-),score=4.62,AA3R_BOVIN	High	23.588 5.45e-11,7tm_1|PF00001.21|2.4e-28,7TM_GPCR_Srsx|PF10320.9|3.9e-05,LapA_dom|PF06305.11|8.4e+02,LapA_dom|PF06305.11|0.048,LapA_dom|PF06305.11|6.9e+03,Srg|PF02118.21|74 OFAVBQ_DN210884_c1_g3_i1:222-1052(-)	0.068	0	13	1	1	1	1	276	32.1	9.96	0	1																Low	Low	Low	Low	Low	Low	Low	Low
OFAVBQ_DN205097_c2_g2_i2.p1			High	OFAVBQ_DN205097_c2_g2~~OFAVBQ_DN205097_c2_g2_i2.p1 ORF type:internal len:115 (-),score=12.66 OFAVBQ_DN205097_c2_g2_i2:1-342(-)	0.068	0	7	1	1	1	1	114	13.3	9	0	1																Low	Low	Low	Low	Low	Low	Low	Low
OFAVBQ_DN224910_c3_g1_i3.p1	type:complete	(-),score=11.46,BRCA2	High	PF00634.18 0.32,BRCA2|PF00634.18|8.6e+02 OFAVBQ_DN224910_c3_g1_i3:810-1226(-)	0.068	0	6	1	1	1	1	138	15.2	8.97	0	1																Low	Low	Low	Low	Low	Low	Low	Low
OFAVBQ_DN224344_c4_g1_i5.p2	type:complete	(-),score=38.18,GLD2B_XENLA	High	35.913 3.40e-54,NTP_transf_2|PF01909.23|2.2e-06,PAP_assoc|PF03828.19|3.2e-06 OFAVBQ_DN224344_c4_g1_i5:832-1821(-)	0.069	0	4	1	1	1	1	329	37.3	9.52	0	1																Low	Not Found	Low	Low	Low	Low	Low	Low
OFAVBQ_DN202615_c1_g2_i1.p1	type:complete	(-),score=6.59,CCH1R_DROME	High	28.664 8.57e-30,7tm_1|PF00001.21|5.8e-38,7tm_4|PF13853.6|0.003,Oxidored_q2|PF00420.24|9.1e+02,Oxidored_q2|PF00420.24|8.7 OFAVBQ_DN202615_c1_g2_i1:123-1148(-)	0.068	0	2	1	1	1	1	341	38.5	9.7	0	1																Low	Not Found	Low	Low	Low	Low	Low	Low
OFAVBQ_DN220871_c4_g1_i2.p1	type:complete	(-),score=121.89,IF4B_HUMAN	High	33.176 3.17e-19 OFAVBQ_DN220871_c4_g1_i2:1012-2856(-)	0.068	0	1	1	1	1	1	614	70.8	8.62	0	1																Low	Not Found	Low	Low	Low	Low	Low	Low
OFAVBQ_DN225397_c1_g1_i1.p1	type:internal	(-),score=37.05,DI3L1_XENLA	High	38.028 3.50e-06,RNB|PF00773.19|3.9e-07,RNB|PF00773.19|5.2e+02 OFAVBQ_DN225397_c1_g1_i1:1-879(-)	0.067	0	3	1	1	1	1	293	33.8	9.57	0	1																Low	Not Found	Low	Low	Low	Low	Low	Low
OFAVBQ_DN222940_c3_g1_i5.p1	type:complete	(-),score=47.33,DED	High	PF01335.21 2e-07,DED|PF01335.21|2.8e+03,Bcl-2|PF00452.19|1.1e+03,Bcl-2|PF00452.19|0.27 OFAVBQ_DN222940_c3_g1_i5:2067-2972(-)	0.067	0	5	1	1	1	1	301	34.2	5.45	0	1																Low	Not Found	Low	Low	Low	Low	Low	Low
OFAVBQ_DN224623_c5_g1_i1.p1	type:complete	(-),score=381.05,MUS81_KLULA	High	28.395 1.71e-11,ERCC4|PF02732.15|1.2e-15,ERCC4|PF02732.15|85,ERCC4|PF02732.15|1e+04,zf-B_box|PF00643.24|0.00054,zf-B_box|PF00643.24|6.2e+03,UIM|PF02809.20|15,UIM|PF02809.20|2.4e+02,UIM|PF02809.20|61,UIM|PF02809.20|1e+02,UIM|PF02809.20|3.1,UIM|PF02809.20|3.2e+02,UIM|PF02809.20|2.6e+03,UIM|PF02809.20|2.1,zf-CCHC_6|PF15288.6|7.7e+03,zf-CCHC_6|PF15288.6|0.0071,ArfGap|PF01412.18|0.042,ArfGap|PF01412.1…	0.068	0	2	4	4	4	1	1656	185.8	6.42	0	4																Low	Low	Low	Low	Low	Low	Low	Low
OFAVBQ_DN209180_c1_g1_i6.p1			High	OFAVBQ_DN209180_c1_g1~~OFAVBQ_DN209180_c1_g1_i6.p1 ORF type:3prime_partial len:91 (+),score=18.46 OFAVBQ_DN209180_c1_g1_i6:1037-1306(+)	0.066	0	10	1	1	1	1	90	10	7.34	0	1																Low	Not Found	Low	Low	Low	Low	Low	Low
OFAVBQ_DN205868_c0_g1_i2.p6			High	OFAVBQ_DN205868_c0_g1~~OFAVBQ_DN205868_c0_g1_i2.p6 ORF type:complete len:89 (+),score=0.05 OFAVBQ_DN205868_c0_g1_i2:597-863(+)	0.066	0	11	1	2	1	1	88	10.3	10.45	0	1																Low	Low	Low	Low	Low	Low	Low	Low
OFAVBQ_DN189369_c0_g1_i1.p2	type:3prime_partial	(-),score=12.81,UBE13_WHEAT	High	67.901 4.00e-30,UBA_e1_thiolCys|PF10585.9|1.4e-06,ThiF|PF00899.21|5.2e-06 OFAVBQ_DN189369_c0_g1_i1:3-242(-)	0.066	0	33	1	1	1	1	80	8.6	10.27	0	1	0.01	1.318	1.152	1.264	2.622	1.874	2.368	69		90.9	79.5	87.2	180.8	129.3	163.3	Low	Not Found	Low	Low	Low	Low	Low	Low
OFAVBQ_DN207205_c3_g2_i2.p1	type:complete	(-),score=94.22,GKAP1_DANRE	High	29.412 3.34e-18,CCDC92|PF14916.6|0.54,CCDC92|PF14916.6|14,Methyltrn_RNA_4|PF09936.9|2.3e+03,Methyltrn_RNA_4|PF09936.9|0.13,HycH|PF07450.11|7.5e+03,HycH|PF07450.11|0.19 OFAVBQ_DN207205_c3_g2_i2:776-1834(-)	0.066	0	3	1	2	1	1	352	40	5.82	0	1																Low	Low	Low	Low	Low	Low	Low	Low
OFAVBQ_DN256075_c0_g1_i1.p1	type:internal	(+),score=29.22,DDX4_PELLE	High	59.091 1.15e-19 OFAVBQ_DN256075_c0_g1_i1:1-348(+)	0.066	0	9	1	3	1	1	116	12.7	5.97	0	1																Low	Low	Low	Low	Low	Low	Low	Low
OFAVBQ_DN216833_c4_g3_i1.p2			High	OFAVBQ_DN216833_c4_g3~~OFAVBQ_DN216833_c4_g3_i1.p2 ORF type:complete len:183 (-),score=16.99 OFAVBQ_DN216833_c4_g3_i1:1006-1554(-)	0.066	0	4	1	7	1	1	182	21.5	9.67	0	1																Low	Low	Low	Low	Low	Low	Low	Low
OFAVBQ_DN224396_c3_g2_i3.p1	type:complete	(-),score=396.63,VIR_MOUSE	High	34.207 0.0,VIR_N|PF15912.5|1.9e-43,DUF489|PF04356.12|0.35 OFAVBQ_DN224396_c3_g2_i3:452-6106(-)	0.066	0	1	1	1	1	1	1884	209.5	5.26	0	1																Low	Not Found	Low	Low	Low	Low	Low	Low
OFAVBQ_DN176603_c0_g1_i1.p1	type:internal	(-),score=14.95,PUR4_HUMAN	High	66.154 4.20e-21,SCO1-SenC|PF02630.14|0.35,SCO1-SenC|PF02630.14|3e+03 OFAVBQ_DN176603_c0_g1_i1:1-213(-)	0.066	0	8	1	2	1	1	71	7.4	7.12	0	1	1.237	0.864	1.042	0.907	0.736	1.097	0.855	103.4	127.9	89.3	107.8	93.7	76.1	113.5	88.4	Low	Low	Low	Low	Low	Low	Low	Low
OFAVBQ_DN201096_c0_g1_i1.p1	type:internal	(-),score=7.49,MOV10_CHICK	High	52.500 4.21e-19,AAA_12|PF13087.6|8.8e-06,DUF5066|PF16728.5|0.1 OFAVBQ_DN201096_c0_g1_i1:2-232(-)	0.066	0	13	1	1	1	1	77	9	6	0	1	1.124	0.707	2.163	1.423	1.884	2.418	0.551	71	79.8	50.2	153.6	101	133.8	171.6	39.1	Low	Low	Low	Low	Low	Low	Low	Low
OFAVBQ_DN209256_c3_g5_i1.p1	type:complete	(-),score=10.33,MPV17_DANRE	High	50.000 1.12e-35,Mpv17_PMP22|PF04117.12|6.6e-21,DUF1129|PF06570.11|0.16,DUF1129|PF06570.11|1.2e+03 OFAVBQ_DN209256_c3_g5_i1:839-1246(-)	0.066	0	4	1	1	1	1	135	15.3	9.17	0	1																Low	Low	Low	Low	Low	Low	Low	Low
OFAVBQ_DN46176_c0_g1_i1.p1	type:internal	(-),score=18.46,RL21B_YEAST	High	52.439 1.25e-24,Ribosomal_L21e|PF01157.18|3.2e-17,Ribosomal_L21e|PF01157.18|1.4e+03 OFAVBQ_DN46176_c0_g1_i1:3-248(-)	0.067	0	16	2	3	2	1	82	9.6	10.87	0	2																Low	Not Found	Low	Low	Low	Low	Low	Low
OFAVBQ_DN219188_c3_g1_i7.p1	type:complete	(-),score=113.27,SYAC_PONAB	High	54.386 2.96e-169,tRNA-synt_2c|PF01411.19|8.5e-22,tRNA-synt_2c|PF01411.19|1.1e+03,DHHA1|PF02272.19|1.1e+03,DHHA1|PF02272.19|6.3e-19,tRNA_SAD|PF07973.14|1.4e-16 OFAVBQ_DN219188_c3_g1_i7:687-2048(-)	0.067	0	2	1	4	1	1	453	49.9	6.14	0	1	1.476	1.249	1.227	1.5	2.186	1.866	2.288	62.5	92.3	78.1	76.8	93.8	136.7	116.7	143.1	Low	Low	Low	Low	Low	Low	Low	Low
OFAVBQ_DN216723_c0_g6_i1.p1	type:internal	(-),score=35.10,TIR_2	High	PF13676.6 3.4e-18,TIR|PF01582.20|0.00028,DUF3484|PF11983.8|1e+02,DUF3484|PF11983.8|2.4e+03,DUF3484|PF11983.8|78 OFAVBQ_DN216723_c0_g6_i1:3-713(-)	0.067	0	5	1	1	1	1	237	27	4.79	0	1																Low	Not Found	Low	Low	Low	Low	Low	Low
OFAVBQ_DN219199_c0_g1_i8.p2	type:complete	(-),score=71.34,CHS2_CAEEL	High	26.970 1.67e-24 OFAVBQ_DN219199_c0_g1_i8:4855-6744(-)	0.067	0	2	1	1	1	1	629	70.4	8.88	0	1																Not Found	Not Found	Not Found	Not Found	Not Found	Not Found	Not Found	Not Found
OFAVBQ_DN191726_c0_g1_i1.p1	type:complete	(-),score=82.81,NMDZ1_RAT	High	23.478 5.26e-53,Lig_chan-Glu_bd|PF10613.9|2.1e+03,Lig_chan-Glu_bd|PF10613.9|5.5e-21,ANF_receptor|PF01094.28|9.2e-12,SBP_bac_3|PF00497.20|5.4e-13,Lig_chan|PF00060.26|5.4e+03,Lig_chan|PF00060.26|2.2e-10,Neprosin_AP|PF14365.6|88,Neprosin_AP|PF14365.6|31,Neprosin_AP|PF14365.6|4.3e+03 OFAVBQ_DN191726_c0_g1_i1:85-2775(-)	0.066	0	2	2	2	2	1	896	100.6	7.93	0	2																Low	Low	Low	Low	Low	Low	Low	Low
OFAVBQ_DN210871_c3_g1_i3.p1	type:complete	(-),score=82.25,CSTF3_HUMAN	High	54.795 2.85e-131,Suf|PF05843.14|4.3e-77,SF3A3|PF16837.5|1.2,SF3A3|PF16837.5|72 OFAVBQ_DN210871_c3_g1_i3:538-1605(-)	0.066	0	3	1	9	1	1	355	40.1	5.64	0	1																Low	Low	Low	Low	Low	Low	Low	Low
OFAVBQ_DN220013_c2_g1_i2.p2	type:complete	(-),score=12.47,RNF26_MOUSE	High	33.019 1.48e-12,zf-C3HC4_3|PF13920.6|5.9e-12,Prok-RING_4|PF14447.6|1.1e-06,U1snRNP70_N|PF12220.8|0.19 OFAVBQ_DN220013_c2_g1_i2:1371-2261(-)	0.065	0	2	1	1	1	1	296	34	8.72	0	1																Low	Not Found	Low	Low	Low	Low	Low	Low
OFAVBQ_DN223096_c1_g3_i1.p1	type:complete	(-),score=217.39,CC175_RAT	High	25.195 1.54e-13,YabA|PF06156.13|1.3e+04,YabA|PF06156.13|0.0088,YabA|PF06156.13|4.9e+02,YabA|PF06156.13|3.1e+03,YabA|PF06156.13|49,YabA|PF06156.13|2.3e+03,YabA|PF06156.13|1e+03,YabA|PF06156.13|78,YabA|PF06156.13|1.4e+02,YabA|PF06156.13|7e+02 OFAVBQ_DN223096_c1_g3_i1:2668-5055(-)	0.066	0	3	2	2	2	1	795	92	7.23	0	2																Low	Not Found	Low	Low	Low	Low	Low	Low
OFAVBQ_DN206538_c1_g1_i5.p1	type:complete	(-),score=33.97,ARMET_DROYA	High	56.213 3.01e-63,Armet|PF10208.9|1.8e-64,E6|PF00518.17|0.12,E6|PF00518.17|17 OFAVBQ_DN206538_c1_g1_i5:779-1297(-)	0.065	0	4	1	1	1	1	172	19.9	6.55	0	1																Low	Not Found	Low	Low	Low	Low	Low	Low
OFAVBQ_DN225121_c1_g1_i2.p1	type:complete	(-),score=386.74,ATS9_HUMAN	High	42.524 0.0,ATS9_HUMAN|35.023|3.89e-167,ATS9_HUMAN|33.953|4.90e-111,ATS9_HUMAN|30.583|1.00e-100,ATS9_HUMAN|31.087|5.33e-100,ATS9_HUMAN|32.038|3.28e-95,TSP_1|PF00090.19|1.8e+04,TSP_1|PF00090.19|1.5e-07,TSP_1|PF00090.19|4.9e+03,TSP_1|PF00090.19|12,TSP_1|PF00090.19|2.1e+02,TSP_1|PF00090.19|0.011,TSP_1|PF00090.19|1.7e-06,TSP_1|PF00090.19|0.00084,TSP_1|PF00090.19|0.00076,TSP_1|PF00090.19|0.7,TSP_1|PF00…	0.065	0	0	1	4	1	1	2847	315.7	8.48	0	1																Low	Low	Low	Low	Low	Low	Low	Low
OFAVBQ_DN222024_c1_g1_i3.p1	type:complete	(-),score=97.85,COR2B_XENTR	High	50.513 7.44e-143,DUF1899|PF08953.11|7.8e-26,WD40|PF00400.32|0.003,WD40|PF00400.32|0.057,WD40|PF00400.32|0.00072,WD40|PF00400.32|3.6e+03,WD40|PF00400.32|2.7e+03,WD40_4|PF16300.5|5.3e+02,WD40_4|PF16300.5|1.4e-12,ANAPC4_WD40|PF12894.7|37,ANAPC4_WD40|PF12894.7|8.8,ANAPC4_WD40|PF12894.7|0.023,ANAPC4_WD40|PF12894.7|7.1e+03,Sacchrp_dh_NADP|PF03435.18|0.35,ATG16|PF08614.11|1.4e+03,ATG16|PF08614.11|0.91 O…	0.065	0	3	2	2	2	1	570	64.6	8.78	0	2																Low	Not Found	Low	Low	Low	Low	Low	Low
OFAVBQ_DN225204_c1_g2_i1.p1	type:complete	(-),score=954.09,GAS	High	PF13851.6 1.8e+04,GAS|PF13851.6|4.6,GAS|PF13851.6|1.5e+03,GAS|PF13851.6|1e+03,GAS|PF13851.6|3.2,GAS|PF13851.6|36,GAS|PF13851.6|1.1e+04,GAS|PF13851.6|54,GAS|PF13851.6|3.2,GAS|PF13851.6|2.1,GAS|PF13851.6|3.6e+02,GAS|PF13851.6|0.15,GAS|PF13851.6|2.7,GAS|PF13851.6|1.2e+04,GAS|PF13851.6|48,GAS|PF13851.6|0.24,GAS|PF13851.6|1.8e+04,GAS|PF13851.6|5.8e+03,GAS|PF13851.6|60,GAS|PF13851.6|2.2e+02,GAS|PF13851…	0.065	0	1	4	5	4	1	3706	427.4	5.05	0	4	1.337	0.93	1.167	1.384	0.569	0.988	0.945	96.2	128.5	89.4	112.2	133.1	54.7	95	90.9	Low	Low	Low	Low	Low	Low	Low	Low
OFAVBQ_DN222206_c1_g2_i1.p2			High	OFAVBQ_DN222206_c1_g2~~OFAVBQ_DN222206_c1_g2_i1.p2 ORF type:internal len:75 (+),score=17.22 OFAVBQ_DN222206_c1_g2_i1:3-224(+)	0.057	0	11	1	1	1	1	74	8.5	5.15	0	1																Low	Not Found	Low	Low	Low	Low	Low	Low
OFAVBQ_DN215565_c0_g1_i5.p1	type:complete	(-),score=295.72,GR101_LYMST	High	40.038 1.31e-112,GR101_LYMST|34.848|2.22e-11,GR101_LYMST|32.394|1.44e-07,GR101_LYMST|31.788|1.29e-06,GR101_LYMST|25.843|4.43e-06,MAM|PF00629.23|0.0012,MAM|PF00629.23|1.1e-41,MAM|PF00629.23|1.6e-12,MAM|PF00629.23|1.4e+02,MAM|PF00629.23|8.7e-10,LRR_8|PF13855.6|1.5e-07,LRR_8|PF13855.6|7.7e-12,LRR_8|PF13855.6|2.4e-13,LRR_8|PF13855.6|67,fn2|PF00040.19|6.8e-16,fn2|PF00040.19|9.1e-05,fn2|PF00040.19|1.8e…	0.067	0	1	2	2	2	1	2677	302.9	6.34	0	2																Low	Low	Low	Low	Low	Low	Low	Low
OFAVBQ_DN192616_c0_g3_i1.p1	type:internal	(-),score=41.68,Ephrin_rec_like	High	PF07699.13 2.2,Ephrin_rec_like|PF07699.13|0.00055,Ephrin_rec_like|PF07699.13|1.5e+02,Ephrin_rec_like|PF07699.13|2,NCD3G|PF07562.14|58,NCD3G|PF07562.14|0.14,NCD3G|PF07562.14|0.43,NCD3G|PF07562.14|2e+02,NCD3G|PF07562.14|0.66,TNFR_c6|PF00020.18|17,TNFR_c6|PF00020.18|0.54,TNFR_c6|PF00020.18|32,TNFR_c6|PF00020.18|4.4e+02,TNFR_c6|PF00020.18|1.9e+02,TNFR_c6|PF00020.18|7.7e+03 OFAVBQ_DN192616_c0_g3_i1:3-…	0.059	0	2	1	1	1	1	452	50.6	8.18	0	1																Low	Not Found	Low	Low	Low	Low	Low	Low
OFAVBQ_DN193261_c0_g1_i1.p1	type:internal	(-),score=47.92,Helitron_like_N	High	PF14214.6 8.3e-09 OFAVBQ_DN193261_c0_g1_i1:3-836(-)	0.061	0	5	1	1	1	1	278	31.7	5.41	0	1																Low	Not Found	Low	Low	Low	Low	Low	Low
OFAVBQ_DN213031_c0_g1_i2.p1	type:complete	(-),score=230.31,DUF4250	High	PF14056.6 4.1e+03,DUF4250|PF14056.6|4.4e+02,DUF4250|PF14056.6|1.9,Transglut_prok|PF09017.10|3.7e+03,Transglut_prok|PF09017.10|0.2,Transglut_prok|PF09017.10|1.2e+03 OFAVBQ_DN213031_c0_g1_i2:587-3544(-)	0.039	0	1	1	1	1	1	985	111.5	5.15	0	1	0.539	1.022	0.668	0.55	0.535	0.834	0.636	138.3	74.5	141.4	92.3	76.1	74	115.4	88	Low	Low	Low	Low	Low	Low	Low	Low
OFAVBQ_DN212283_c0_g1_i5.p2			High	OFAVBQ_DN212283_c0_g1~~OFAVBQ_DN212283_c0_g1_i5.p2 ORF type:complete len:203 (-),score=32.98 OFAVBQ_DN212283_c0_g1_i5:2627-3235(-)	0.039	0	3	1	1	1	1	202	22.3	6.28	0	1																Low	Not Found	Low	Low	Low	Low	Low	Low
OFAVBQ_DN209497_c2_g5_i1.p1			High	OFAVBQ_DN209497_c2_g5~~OFAVBQ_DN209497_c2_g5_i1.p1 ORF type:5prime_partial len:141 (+),score=26.88 OFAVBQ_DN209497_c2_g5_i1:2-424(+)	0.039	0	6	1	1	1	1	140	15.5	8.24	0	1																Low	Low	Low	Low	Low	Low	Low	Low
OFAVBQ_DN215899_c1_g4_i8.p1	type:complete	(-),score=198.09,FLA10_CHLRE	High	36.476 1.55e-64,Kinesin|PF00225.23|2.1e-56,Kinesin|PF00225.23|1.6e-38,Microtub_bd|PF16796.5|8.7e-26,Microtub_bd|PF16796.5|6.7e+03,CCDC24|PF15669.5|0.00098,CCDC24|PF15669.5|13,Apolipoprotein|PF01442.18|0.0013,Apolipoprotein|PF01442.18|6.2e+03,KASH_CCD|PF14662.6|1.2,KASH_CCD|PF14662.6|1.9e+03,KASH_CCD|PF14662.6|2.4e+03,KASH_CCD|PF14662.6|1.3,KASH_CCD|PF14662.6|0.31,Sipho_Gp157|PF05565.11|0.12,Sipho…	0.04	0	1	1	1	1	1	910	102.4	5.77	0	1																Low	Not Found	Low	Low	Low	Low	Low	Low
OFAVBQ_DN199354_c1_g1_i1.p1			High	OFAVBQ_DN199354_c1_g1~~OFAVBQ_DN199354_c1_g1_i1.p1 ORF type:5prime_partial len:77 (-),score=16.18 OFAVBQ_DN199354_c1_g1_i1:221-451(-)	0.04	0	11	1	1	1	1	76	8.1	5.26	0	1																Low	Not Found	Low	Low	Low	Low	Low	Low
OFAVBQ_DN225486_c9_g1_i1.p3			High	OFAVBQ_DN225486_c9_g1~~OFAVBQ_DN225486_c9_g1_i1.p3 ORF type:complete len:81 (+),score=0.62 OFAVBQ_DN225486_c9_g1_i1:1344-1586(+)	0.04	0	8	1	1	1	1	80	9.3	9	0	1																Low	Not Found	Low	Low	Low	Low	Low	Low
OFAVBQ_DN222141_c3_g1_i2.p2			High	OFAVBQ_DN222141_c3_g1~~OFAVBQ_DN222141_c3_g1_i2.p2 ORF type:complete len:92 (+),score=11.08 OFAVBQ_DN222141_c3_g1_i2:2051-2326(+)	0.04	0	9	1	1	1	1	91	10.1	9.79	0	1	2.146	0.859	1.375	1.45	0.66	0.587	0.75	90.6	194.5	77.9	124.6	131.4	59.8	53.2	68	Low	Low	Low	Low	Low	Low	Low	Low
OFAVBQ_DN224330_c2_g1_i1.p1	type:complete	(-),score=248.12,NWD1_MOUSE	High	28.249 4.56e-163,NWD1_MOUSE|21.891|9.80e-10,NWD1_MOUSE|24.615|1.41e-06,WD40|PF00400.32|0.0032,WD40|PF00400.32|1.2,WD40|PF00400.32|0.0054,WD40|PF00400.32|5.3e-07,WD40|PF00400.32|1.3e-05,WD40|PF00400.32|1.2e-05,WD40|PF00400.32|0.00017,WD40|PF00400.32|9e-07,WD40|PF00400.32|0.79,WD40|PF00400.32|8.4e+02,WD40|PF00400.32|0.024,WD40|PF00400.32|0.011,WD40|PF00400.32|2.4e-06,WD40|PF00400.32|0.02,WD40|PF004…	0.04	0	0	1	1	1	1	1636	183.7	6.79	0	1																Not Found	Not Found	Not Found	Not Found	Not Found	Not Found	Not Found	Not Found
OFAVBQ_DN194466_c0_g1_i3.p1	type:complete	(-),score=1.39,MENTAL	High	PF10457.9 0.084 OFAVBQ_DN194466_c0_g1_i3:59-322(-)	0.039	0	10	1	1	1	1	87	10	9.66	0	1																Low	Low	Low	Low	Low	Low	Low	Low
OFAVBQ_DN224937_c0_g1_i1.p1	type:complete	(-),score=1137.61,TITIN_HUMAN	High	25.896 0.0,TITIN_HUMAN|24.863|0.0,TITIN_HUMAN|24.436|0.0,TITIN_HUMAN|25.294|0.0,TITIN_HUMAN|25.230|0.0,TITIN_HUMAN|26.230|0.0,TITIN_HUMAN|25.821|0.0,TITIN_HUMAN|25.344|0.0,TITIN_HUMAN|26.009|2.94e-172,TITIN_HUMAN|24.784|5.19e-166,TITIN_HUMAN|24.901|4.18e-142,TITIN_HUMAN|23.808|2.99e-119,TITIN_HUMAN|22.858|3.66e-109,TITIN_HUMAN|24.182|1.85e-89,TITIN_HUMAN|25.413|5.61e-87,TITIN_HUMAN|23.687|4.86e-8…	0.04	0	0	2	5	2	1	4761	527.7	5.08	0	2																Low	Not Found	Low	Low	Low	Low	Low	Low
OFAVBQ_DN218924_c0_g3_i2.p2	type:complete	(-),score=26.87,Rpr2	High	PF04032.16 1.3e-08,Rpr2|PF04032.16|2,DUF4674|PF15719.5|2.9e-07,zf-RING_7|PF02591.15|26,zf-RING_7|PF02591.15|9.8e+03,zf-RING_7|PF02591.15|7,DUF35_N|PF12172.8|2.1e+02,DUF35_N|PF12172.8|2,zinc_ribbon_2|PF13240.6|22,zinc_ribbon_2|PF13240.6|5.3,zf-RRN7|PF11781.8|2.6,zf-RRN7|PF11781.8|43,zf-3CxxC_2|PF17180.4|6.1 OFAVBQ_DN218924_c0_g3_i2:2201-2812(-)	0.04	0	3	1	1	1	1	203	23	10.29	0	1																Low	Low	Low	Low	Low	Low	Low	Low
OFAVBQ_DN202470_c1_g2_i1.p1	type:complete	(-),score=74.66,RNP1A_XENLA	High	60.417 2.22e-35,RRM_1|PF00076.22|8e-17,RRM_5|PF13893.6|3.2e-05,PI3K_1B_p101|PF10486.9|7 OFAVBQ_DN202470_c1_g2_i1:881-2068(-)	0.048	0	7	4	6	4	1	395	43.4	11.88	0	4																Low	Low	Low	Low	Low	Low	Low	Low
OFAVBQ_DN206003_c0_g1_i3.p1	type:complete	(-),score=38.20,ARMC1_MOUSE	High	47.287 4.09e-31,ARMC1_MOUSE|45.070|1.37e-28,Arm|PF00514.23|0.031 OFAVBQ_DN206003_c0_g1_i3:989-2203(-)	0.048	0	1	1	1	1	1	404	45.5	9.07	0	1	1.319	1.603	0.822	0.867	0.96	0.758	0.754	99	130.5	158.6	81.4	85.8	95	75	74.7	Low	Low	Low	Low	Low	Low	Low	Low
OFAVBQ_DN224392_c1_g1_i4.p1	type:3prime_partial	(-),score=67.59,DZIP3_MOUSE	High	27.333 2.03e-14,HEPN_DZIP3|PF18738.1|3.6e-55,HEPN_DZIP3|PF18738.1|1.1e+03,HEPN_DZIP3|PF18738.1|2e+03,IL11|PF07400.11|0.00047,Macoilin|PF09726.9|0.00091,Baculo_PEP_C|PF04513.12|0.00094,AAA_32|PF13654.6|0.0052,WXG100|PF06013.12|0.2,WXG100|PF06013.12|42,DHC_N1|PF08385.12|0.017,HBM|PF16591.5|8.2,HBM|PF16591.5|0.36,NPV_P10|PF05531.12|17,NPV_P10|PF05531.12|0.044,Gp-FAR-1|PF05823.12|0.046,Laminin_II|PF0…	0.048	0	2	1	1	1	1	304	34.5	5.31	0	1	0.01	1.023	1.739	1.522	0.876	1.333	0.861	95.8		98	166.5	145.8	83.9	127.6	82.5	Low	Not Found	Low	Low	Low	Low	Low	Low
OFAVBQ_DN165243_c1_g1_i1.p1	type:internal	(-),score=8.23,ACOX1_RAT	High	50.360 1.75e-42,nec1|PF10379.9|0.019,Acyl-CoA_dh_M|PF02770.19|0.66,Acyl-CoA_dh_M|PF02770.19|7.6e+02 OFAVBQ_DN165243_c1_g1_i1:1-435(-)	0.056	0	6	1	1	1	1	145	16.2	9.39	0	1																Low	Not Found	Low	Low	Low	Low	Low	Low
OFAVBQ_DN217036_c0_g1_i6.p2			High	OFAVBQ_DN217036_c0_g1~~OFAVBQ_DN217036_c0_g1_i6.p2 ORF type:complete len:122 (-),score=19.12 OFAVBQ_DN217036_c0_g1_i6:2067-2432(-)	0.06	0	9	1	1	1	1	121	12.2	5.9	0	1																Low	Not Found	Low	Low	Low	Low	Low	Low
OFAVBQ_DN222213_c0_g1_i11.p1	type:complete	(-),score=219.01,M3K4_MOUSE	High	36.049 1.24e-95,M3K4_MOUSE|27.106|4.81e-13 OFAVBQ_DN222213_c0_g1_i11:4465-7557(-)	0.06	0	3	4	5	4	1	1030	116.6	5.74	0	4																Low	Low	Low	Low	Low	Low	Low	Low
OFAVBQ_DN211042_c0_g2_i1.p1	type:complete	(-),score=32.83,CTNS_BOVIN	High	59.836 5.72e-109,PQ-loop|PF04193.14|1.1e-17,PQ-loop|PF04193.14|8.8e+03,PQ-loop|PF04193.14|1.3e-19 OFAVBQ_DN211042_c0_g2_i1:207-1037(-)	0.06	0	4	1	2	1	1	276	31.8	8.79	0	1																Low	Not Found	Low	Low	Low	Low	Low	Low
OFAVBQ_DN209778_c1_g1_i5.p1	type:complete	(-),score=34.75,SYDC_BOVIN	High	54.023 1.70e-24,tRNA_anti-codon|PF01336.25|0.0029,DUF3464|PF11947.8|1.5,OAD_gamma|PF04277.13|6 OFAVBQ_DN209778_c1_g1_i5:2932-3486(-)	0.04	0	5	1	1	1	1	184	20.6	10.1	0	1																Low	Low	Low	Low	Low	Low	Low	Low
OFAVBQ_DN215743_c0_g3_i1.p1	type:complete	(-),score=210.72,LEVS_LACSN	High	42.529 6.03e-10,LEVS_LACSN|45.312|1.85e-08 OFAVBQ_DN215743_c0_g3_i1:921-3932(-)	0.06	0	2	3	17	3	1	1003	111.2	7.43	0	3																Low	Low	Low	Low	Low	Low	Low	Low
OFAVBQ_DN221057_c0_g2_i4.p1	type:internal	(-),score=86.99,LORF2_HUMAN	High	25.111 2.01e-29,RVT_1|PF00078.27|7e-38 OFAVBQ_DN221057_c0_g2_i4:3-1505(-)	0.04	0	7	4	5	4	1	501	57.1	9.03	0	4																Low	Low	Low	Low	Low	Low	Low	Low
OFAVBQ_DN306506_c0_g1_i1.p2			High	OFAVBQ_DN306506_c0_g1~~OFAVBQ_DN306506_c0_g1_i1.p2 ORF type:internal len:78 (-),score=19.92 OFAVBQ_DN306506_c0_g1_i1:2-232(-)	0.04	0	9	1	1	1	1	77	9.2	5.25	0	1	0.776	1.522	0.865	0.605	0.869	1.131	0.717	106.9	83	162.6	92.5	64.7	92.9	120.8	76.7	Low	Low	Low	Low	Low	Low	Low	Low
OFAVBQ_DN219065_c2_g2_i3.p1	type:complete	(-),score=201.16,NFKB1_CHICK	High	40.182 0.0,RHD_DNA_bind|PF00554.22|3.4e-62,RHD_dimer|PF16179.5|9.1e-38,Ank_2|PF12796.7|0.00013,Ank_2|PF12796.7|3.1e-12,Ank_2|PF12796.7|2.9e-07,Ank|PF00023.30|0.16,Ank|PF00023.30|0.35,Ank|PF00023.30|0.16,Ank|PF00023.30|0.0014,Ank|PF00023.30|0.033,Ank|PF00023.30|0.0014,Ank_4|PF13637.6|0.027,Ank_4|PF13637.6|6e-06,Ank_4|PF13637.6|0.0032,Ank_4|PF13637.6|5.6e-05,Ank_4|PF13637.6|6e-05,Ank_4|PF13637.6|1.…	0.039	0	1	1	3	1	1	920	98.8	5.85	0	1																Low	Low	Low	Low	Low	Low	Low	Low
OFAVBQ_DN218661_c4_g2_i6.p1	type:complete	(-),score=108.91,Patatin	High	PF01734.22 0.00022,Patatin|PF01734.22|2.5e+03 OFAVBQ_DN218661_c4_g2_i6:1029-3476(-)	0.039	0	1	1	2	1	1	815	91.7	6.81	0	1																Low	Not Found	Low	Low	Low	Low	Low	Low
OFAVBQ_DN213872_c3_g3_i8.p1	type:complete	(-),score=32.58,P2RX4_HUMAN	High	50.000 9.84e-83,P2X_receptor|PF00864.19|2.5e-91 OFAVBQ_DN213872_c3_g3_i8:694-1464(-)	0.039	0	2	1	5	1	1	256	29.1	8.24	0	1	0.85	0.919	0.828	0.991	0.967	1.476	0.884	101.1	85.9	92.9	83.7	100.2	97.7	149.2	89.3	Low	Low	Low	Low	Low	Low	Low	Low
OFAVBQ_DN157248_c0_g1_i1.p1			High	OFAVBQ_DN157248_c0_g1~~OFAVBQ_DN157248_c0_g1_i1.p1 ORF type:internal len:74 (-),score=12.26 OFAVBQ_DN157248_c0_g1_i1:3-221(-)	0.039	0	12	1	1	1	1	73	8.2	5	0	1																Low	Low	Low	Low	Low	Low	Low	Low
OFAVBQ_DN203121_c0_g1_i4.p1	type:complete	(-),score=94.57,Peptidase_C10	High	PF01640.17 2.4e+03,Peptidase_C10|PF01640.17|0.03,SNARE|PF05739.19|0.27,SNARE|PF05739.19|2.9e+03,FixP_N|PF14715.6|1.3e+02,FixP_N|PF14715.6|3.3 OFAVBQ_DN203121_c0_g1_i4:966-2969(-)	0.039	0	1	1	1	1	1	667	76.2	9.01	0	1																Low	Not Found	Low	Low	Low	Low	Low	Low
OFAVBQ_DN220733_c1_g3_i3.p1	type:complete	(-),score=318.97,ADGB_MOUSE	High	32.734 5.38e-161,IQ|PF00612.27|0.0014,Globin|PF00042.22|1e+02,Globin|PF00042.22|0.15,Peptidase_C2|PF00648.21|0.13 OFAVBQ_DN220733_c1_g3_i3:441-4352(-)	0.039	0	1	2	2	2	1	1303	146.9	8.46	0	2																Low	Not Found	Low	Low	Low	Low	Low	Low
OFAVBQ_DN221639_c3_g1_i4.p1	type:complete	(-),score=206.16,ATPgrasp_N	High	PF18130.1 0.55 OFAVBQ_DN221639_c3_g1_i4:1982-4414(-)	0.039	0	3	1	1	1	1	810	90.8	4.79	0	1																Low	Not Found	Not Found	Low	Low	Low	Low	Low
OFAVBQ_DN164568_c0_g5_i1.p1	type:3prime_partial	(-),score=37.29,SACS_HUMAN	High	49.339 2.36e-71,SACS_HUMAN|47.407|9.36e-30,SACS_HUMAN|36.986|5.03e-29,HATPase_c_3|PF13589.6|6.2,HATPase_c_3|PF13589.6|4.7 OFAVBQ_DN164568_c0_g5_i1:1-660(-)	0.039	0	5	1	2	1	1	220	24.9	6.15	0	1																Low	Low	Low	Low	Low	Low	Low	Low
OFAVBQ_DN203011_c0_g1_i2.p1	type:complete	(-),score=59.90,DUF3445	High	PF11927.8 0.17 OFAVBQ_DN203011_c0_g1_i2:1135-2067(-)	0.04	0	3	1	1	1	1	310	34.8	8.5	0	1																Low	Low	Low	Low	Low	Low	Low	Low
OFAVBQ_DN210880_c1_g1_i1.p1	type:internal	(-),score=16.58,TPR_8	High	PF13181.6 0.0051,TPR_12|PF13424.6|0.014,TPR_1|PF00515.28|0.03,TPR_7|PF13176.6|5.5e+03,TPR_7|PF13176.6|0.064,TPR_14|PF13428.6|0.15,TPR_10|PF13374.6|0.32 OFAVBQ_DN210880_c1_g1_i1:2-226(-)	0.039	0	12	1	2	1	1	75	8.5	5.91	0	1																Low	Low	Low	Low	Low	Low	Low	Low
OFAVBQ_DN223792_c4_g1_i1.p1	type:complete	(-),score=191.01,TNR1A_BOVIN	High	36.000 3.55e-06,COR|PF16095.5|7.7e-15,Roc|PF08477.13|0.016,Roc|PF08477.13|4.8e-07,Death|PF00531.22|3.1e+03,Death|PF00531.22|2.3e-07,SH3_2|PF07653.17|0.00011,Ras|PF00071.22|8.5,Ras|PF00071.22|0.26,SH3_1|PF00018.28|0.001,Pkinase_Tyr|PF07714.17|0.0014 OFAVBQ_DN223792_c4_g1_i1:117-3167(-)	0.039	0	1	1	2	1	1	1016	115	6.48	0	1																Low	Low	Low	Low	Low	Low	Low	Low
OFAVBQ_DN210464_c5_g2_i7.p1	type:complete	(-),score=171.19,COG3_MOUSE	High	50.622 0.0,Sec34|PF04136.15|8.7e+03,Sec34|PF04136.15|3.2e-52,Sec34|PF04136.15|5.3e+03,Sec34|PF04136.15|7.6e+03,Sec34|PF04136.15|4.1e+03,EXS|PF03124.14|0.061 OFAVBQ_DN210464_c5_g2_i7:1500-3710(-)	0.039	0	1	1	1	1	1	736	83.4	5.96	0	1																Low	Not Found	Low	Low	Low	Low	Low	Low
OFAVBQ_DN213949_c2_g1_i2.p2	type:complete	(-),score=43.67,MKNK2_MOUSE	High	52.632 9.56e-22,Pkinase|PF00069.25|2.1e-07,MKLP1_Arf_bdg|PF16540.5|0.0028,Pkinase_Tyr|PF07714.17|0.094,AAA_assoc_2|PF16193.5|2.9e+02,AAA_assoc_2|PF16193.5|2.1 OFAVBQ_DN213949_c2_g1_i2:4358-4894(-)	0.039	0	4	1	1	1	1	178	20.3	7.91	0	1																Low	Not Found	Low	Low	Low	Low	Low	Low
OFAVBQ_DN213561_c2_g2_i1.p1	type:complete	(-),score=81.27,6PGD_HUMAN	High	77.755 0.0,6PGD|PF00393.19|5.6e-130,NAD_binding_2|PF03446.15|3.1e-50,NAD_binding_11|PF14833.6|0.012,NAD_binding_11|PF14833.6|1e+04,F420_oxidored|PF03807.17|0.055 OFAVBQ_DN213561_c2_g2_i1:923-2503(-)	0.04	0	2	1	2	1	1	526	57.7	8.48	0	1	2.325	1.617	1.251	1.816	1.676	1.729	2.647	56.9	132.3	92	71.1	103.3	95.4	98.4	150.6	Low	Low	Low	Low	Low	Low	Low	Low
OFAVBQ_DN216137_c0_g1_i1.p1	type:complete	(-),score=61.57,MRP1_CHICK	High	44.153 4.93e-114,ABC_membrane|PF00664.23|6.4e-34,PgpA|PF04608.13|0.096 OFAVBQ_DN216137_c0_g1_i1:74-1648(-)	0.04	0	3	2	2	2	1	524	60.3	7.91	0	2																Low	Low	Low	Low	Low	Low	Low	Low
OFAVBQ_DN217298_c1_g1_i3.p1	type:complete	(-),score=362.02,FTM_HUMAN	High	40.416 0.0,C2-C2_1|PF11618.8|9.3e-53,C2-C2_1|PF11618.8|1.2e-05,C2-C2_1|PF11618.8|29,RPGR1_C|PF18111.1|5.7e+02,RPGR1_C|PF18111.1|1e-43,C2|PF00168.30|8.8e+02,C2|PF00168.30|2.7e-06,Fez1|PF06818.15|7.7e+02,Fez1|PF06818.15|0.0029,Fez1|PF06818.15|3.4e+03,Fez1|PF06818.15|1.8e+04,TSC22|PF01166.18|84,TSC22|PF01166.18|0.023,TSC22|PF01166.18|35,TSC22|PF01166.18|9.5e+03,TSC22|PF01166.18|5.5e+03,TSC22|PF01166…	0.04	0	1	1	2	1	1	1340	153.8	4.98	0	1																Low	Low	Low	Low	Low	Low	Low	Low
OFAVBQ_DN225224_c3_g1_i3.p1	type:internal	(-),score=117.96,SACS_HUMAN	High	27.162 1.50e-79 OFAVBQ_DN225224_c3_g1_i3:3-2819(-)	0.04	0	1	1	3	1	1	939	106.2	7.47	0	1																Low	Not Found	Low	Low	Low	Low	Low	Low
OFAVBQ_DN215014_c0_g1_i2.p1	type:complete	(-),score=77.03,PLCL_MYTGA	High	32.576 1.58e-15,Laminin_G_3|PF13385.6|2.1e-20,Lectin_C|PF00059.21|3.4e+03,Lectin_C|PF00059.21|2.9e-14,UL45|PF05473.12|9.2e+02,UL45|PF05473.12|9.1e-05,Pentaxin|PF00354.17|5.4e-05,Cid2|PF09774.9|0.0033,Cid2|PF09774.9|5e+03,Sialidase|PF02973.16|0.037 OFAVBQ_DN215014_c0_g1_i2:1750-3516(-)	0.04	0	4	2	3	2	1	588	64.8	7.75	0	2																Low	Not Found	Low	Low	Low	Low	Low	Low
OFAVBQ_DN201301_c0_g1_i1.p1			High	OFAVBQ_DN201301_c0_g1~~OFAVBQ_DN201301_c0_g1_i1.p1 ORF type:5prime_partial len:97 (-),score=14.41 OFAVBQ_DN201301_c0_g1_i1:1-291(-)	0.039	0	6	1	6	1	1	96	11.2	5.83	0	1																Low	Not Found	Low	Low	Low	Low	Low	Low
OFAVBQ_DN174017_c0_g1_i1.p1			High	OFAVBQ_DN174017_c0_g1~~OFAVBQ_DN174017_c0_g1_i1.p1 ORF type:5prime_partial len:82 (+),score=11.44 OFAVBQ_DN174017_c0_g1_i1:2-247(+)	0.06	0	9	1	1	1	1	81	9.2	10.21	0	1	0.958	0.666	0.784	0.723	0.637	0.655	0.649	131.7	126.2	87.8	103.3	95.2	83.9	86.3	85.5	Low	Low	Low	Low	Low	Low	Low	Low
OFAVBQ_DN201568_c1_g2_i1.p1			High	OFAVBQ_DN201568_c1_g2~~OFAVBQ_DN201568_c1_g2_i1.p1 ORF type:5prime_partial len:379 (-),score=61.51 OFAVBQ_DN201568_c1_g2_i1:840-1976(-)	0.06	0	7	3	3	3	1	378	42	12.29	0	3																Low	Low	Low	Low	Low	Low	Low	Low
OFAVBQ_DN225326_c0_g1_i1.p1	type:complete	(-),score=639.85,CFA54_HUMAN	High	29.755 0.0,DUF4486|PF14858.6|8.1e-202,fn3|PF00041.21|0.0031 OFAVBQ_DN225326_c0_g1_i1:281-10234(-)	0.06	0	1	1	1	1	1	3317	366.4	7.31	0	1																Low	Low	Low	Low	Low	Low	Low	Low
OFAVBQ_DN191121_c0_g1_i1.p1			High	OFAVBQ_DN191121_c0_g1~~OFAVBQ_DN191121_c0_g1_i1.p1 ORF type:complete len:146 (-),score=7.99 OFAVBQ_DN191121_c0_g1_i1:233-670(-)	0.062	0	13	2	7	2	1	145	16.5	9.39	0	2																Low	Not Found	Low	Low	Low	Low	Low	Low
OFAVBQ_DN212752_c2_g1_i6.p4	type:complete	(-),score=22.92,YRD6_CAEEL	High	38.182 1.93e-16,rve|PF00665.26|3.9e-10,rve_3|PF13683.6|0.14 OFAVBQ_DN212752_c2_g1_i6:1319-1720(-)	0.062	0	7	1	1	1	1	133	15.1	9.66	0	1																Low	Not Found	Low	Low	Low	Not Found	Low	Low
OFAVBQ_DN210252_c2_g1_i1.p1	type:complete	(-),score=61.23,FANK1_MOUSE	High	43.865 8.29e-83,Ank_2|PF12796.7|9.2e-15,Ank_2|PF12796.7|8.1e-08,Ank_2|PF12796.7|6.2e-13,Ank_4|PF13637.6|0.018,Ank_4|PF13637.6|1.7e-07,Ank_4|PF13637.6|0.00025,Ank_4|PF13637.6|0.36,Ank_4|PF13637.6|1.3e-07,Ank_4|PF13637.6|5.1e-05,Ank_5|PF13857.6|3.9e+02,Ank_5|PF13857.6|1.7e-08,Ank_5|PF13857.6|5.9e-05,Ank_5|PF13857.6|0.0034,Ank_5|PF13857.6|1e-09,Ank_3|PF13606.6|3e+02,Ank_3|PF13606.6|0.0019,Ank_3|PF13…	0.062	0	3	1	1	1	1	371	41.6	6.11	0	1																Low	Low	Low	Low	Low	Low	Low	Low
OFAVBQ_DN100097_c0_g1_i1.p1	type:internal	(+),score=20.66,zf-C4H2	High	PF10146.9 0.33 OFAVBQ_DN100097_c0_g1_i1:1-699(+)	0.062	0	5	1	1	1	1	233	26.8	10.35	0	1																Low	Not Found	Low	Low	Low	Low	Low	Low
OFAVBQ_DN209028_c0_g1_i1.p1	type:complete	(-),score=138.72,ANM9_MOUSE	High	33.530 9.58e-146,PrmA|PF06325.13|2.6e-06,TPR_2|PF07719.17|3e+02,TPR_2|PF07719.17|1.1e+02,TPR_2|PF07719.17|0.0037,PRMT5_C|PF17286.2|0.0029,PRMT5_C|PF17286.2|28,Methyltransf_18|PF12847.7|0.0002,Methyltransf_25|PF13649.6|0.001,Methyltransf_25|PF13649.6|7.6e+03,Methyltransf_25|PF13649.6|7.4e+03,TPR_1|PF00515.28|1.5e+02,TPR_1|PF00515.28|0.011,Met_10|PF02475.16|0.00044,TPR_14|PF13428.6|2.5,TPR_14|PF134…	0.062	0	1	1	1	1	1	821	90.8	6.02	0	1	1.442	0.732	0.416	2.905	0.696	0.557	2.692	76.6	110.5	56.1	31.9	222.6	53.3	42.7	206.3	Low	Low	Low	Low	Low	Low	Low	Low
OFAVBQ_DN224167_c0_g1_i5.p1	type:complete	(-),score=302.23,KIF1A_DROPS	High	48.286 0.0,Kinesin|PF00225.23|1.7e-115,Kinesin_assoc|PF16183.5|4.1e+03,Kinesin_assoc|PF16183.5|9e-09,Kinesin_assoc|PF16183.5|1.6e-44,DUF3694|PF12473.8|3e-30,Microtub_bd|PF16796.5|1.6e-22,Microtub_bd|PF16796.5|1.1e+04,KIF1B|PF12423.8|2.6e-08,FHA|PF00498.26|7.2e+03,FHA|PF00498.26|6.1e-06,FHA|PF00498.26|3e+03,FHA|PF00498.26|5.3e+03,Yop-YscD_cpl|PF16697.5|0.0011,Yop-YscD_cpl|PF16697.5|7.8e+03,HSDR_N|…	0.062	0	1	2	2	2	1	1558	176.2	5.78	0	2																Low	Not Found	Low	Low	Low	Low	Low	Low
OFAVBQ_DN199420_c3_g1_i6.p1	type:complete	(-),score=34.70,RAB38_HUMAN	High	28.421 6.39e-18,Ras|PF00071.22|2.3e-07,Roc|PF08477.13|2.5e-05 OFAVBQ_DN199420_c3_g1_i6:863-1597(-)	0.061	0	7	1	1	1	1	244	27.7	6.86	0	1																Low	Not Found	Low	Low	Low	Low	Low	Low
OFAVBQ_DN222100_c2_g1_i3.p1	type:complete	(-),score=246.08,CCD17_HUMAN	High	30.435 7.85e-32 OFAVBQ_DN222100_c2_g1_i3:553-4716(-)	0.06	0	1	2	5	2	1	1387	156.5	7.59	0	2																Low	Low	Low	Low	Low	Low	Low	Low
OFAVBQ_DN211162_c1_g1_i4.p2	type:complete	(-),score=14.98,MMP19_HUMAN	High	27.891 2.89e-10,Hemopexin|PF00045.19|1.6,Hemopexin|PF00045.19|7.2e-07,Hemopexin|PF00045.19|9.9e-08,DUF2616|PF11077.8|17,DUF2616|PF11077.8|5.3 OFAVBQ_DN211162_c1_g1_i4:893-1336(-)	0.062	0	7	1	1	1	1	147	17.5	10.65	0	1																Low	Not Found	Low	Low	Low	Low	Low	Low
OFAVBQ_DN180333_c0_g2_i1.p3	type:complete	(-),score=14.24,RVT_1	High	PF00078.27 0.019,DUF2975|PF11188.8|0.14 OFAVBQ_DN180333_c0_g2_i1:626-865(-)	0.061	0	9	1	2	1	1	79	8.8	7.43	0	1																Low	Not Found	Low	Low	Low	Low	Low	Low
OFAVBQ_DN223007_c3_g3_i1.p1	type:internal	(-),score=14.62,KLH12_DANRE	High	37.333 1.76e-11,BACK|PF07707.15|6.2e-19 OFAVBQ_DN223007_c3_g3_i1:1-225(-)	0.061	0	9	1	1	1	1	75	9	7.42	0	1																Low	Not Found	Low	Low	Low	Low	Low	Low
OFAVBQ_DN190438_c0_g2_i1.p1			High	OFAVBQ_DN190438_c0_g2~~OFAVBQ_DN190438_c0_g2_i1.p1 ORF type:internal len:267 (+),score=34.84 OFAVBQ_DN190438_c0_g2_i1:2-799(+)	0.061	0	6	2	3	2	1	266	30.5	8.46	0	2																Low	Low	Low	Low	Low	Low	Low	Low
OFAVBQ_DN224715_c1_g1_i5.p1	type:complete	(-),score=301.98,AGRB3_HUMAN	High	28.356 1.67e-69,7tm_2|PF00002.24|7.3e-55,Ig_3|PF13927.6|0.012,Ig_3|PF13927.6|7.7e+03,Ig_3|PF13927.6|9.2e-10,Ig_3|PF13927.6|2e-09,Ig_3|PF13927.6|1.1e-09,Ig_3|PF13927.6|0.2,Ig_3|PF13927.6|6.7e+03,I-set|PF07679.16|0.15,I-set|PF07679.16|1.6e-07,I-set|PF07679.16|1.5e-07,I-set|PF07679.16|8e-11,I-set|PF07679.16|26,I-set|PF07679.16|3.5e+03,GAIN|PF16489.5|6.2e-24,ig|PF00047.25|3.5e+03,ig|PF00047.25|18,ig|…	0.061	0	0	1	1	1	1	2130	233.9	5.83	0	1																Low	Not Found	Low	Low	Low	Not Found	Low	Low
OFAVBQ_DN216840_c0_g1_i1.p1	type:complete	(-),score=61.69,EFHD2_HUMAN	High	65.957 7.19e-72,EF-hand_1|PF00036.32|3e+03,EF-hand_1|PF00036.32|3.2e-05,EF-hand_1|PF00036.32|1.7e-06,EF-hand_1|PF00036.32|1.3e+04,EF-hand_6|PF13405.6|0.00067,EF-hand_6|PF13405.6|0.0029,EF-hand_7|PF13499.6|1.1e+04,EF-hand_7|PF13499.6|2.4e-09,EF-hand_5|PF13202.6|5.5,EF-hand_5|PF13202.6|0.0099,SPARC_Ca_bdg|PF10591.9|2.2e-05,SPARC_Ca_bdg|PF10591.9|9.2e+02,EF-hand_8|PF13833.6|19,EF-hand_8|PF13833.6|0.…	0.061	0	7	2	2	2	1	193	22.2	5.33	0	2																Low	Low	Low	Low	Low	Low	Low	Low
OFAVBQ_DN223457_c3_g1_i9.p1	type:complete	(-),score=256.14,VWA3A_HUMAN	High	39.187 0.0,VWA_3|PF13768.6|5.5e-22,VWA_3|PF13768.6|8e-05,VWA_3|PF13768.6|8.2e-19,VWA|PF00092.28|0.81,VWA|PF00092.28|3.2e+03,VWA|PF00092.28|3.6e-12,VWA_2|PF13519.6|0.57,VWA_2|PF13519.6|9.2e+02,VWA_2|PF13519.6|2.2e+02,VWA_2|PF13519.6|8.7e-06,VWA_CoxE|PF05762.14|3.3e+02,VWA_CoxE|PF05762.14|0.0072,Hydantoinase_A|PF01968.18|0.37,SLBP_RNA_bind|PF15247.6|4.8e+03,SLBP_RNA_bind|PF15247.6|0.1,IMUP|PF15761.…	0.061	0	1	2	25	2	1	1314	146.7	8.54	0	2																Low	Low	Low	Low	Low	Low	Low	Low
OFAVBQ_DN210105_c1_g1_i5.p1	type:complete	(-),score=82.08,IHABP4_N	High	PF16174.5 6e-09,IHABP4_N|PF16174.5|4.4e+02,HABP4_PAI-RBP1|PF04774.15|1.8e+04,HABP4_PAI-RBP1|PF04774.15|1.8e+04,HABP4_PAI-RBP1|PF04774.15|0.49,HABP4_PAI-RBP1|PF04774.15|4.5e-05 OFAVBQ_DN210105_c1_g1_i5:2206-3030(-)	0.061	0	6	1	1	1	1	274	29.5	9.29	0	1																Low	Not Found	Low	Low	Low	Low	Low	Low
OFAVBQ_DN203163_c0_g1_i1.p1	type:internal	(-),score=33.68,PXDN_DROME	High	36.675 3.79e-51,An_peroxidase|PF03098.15|1.1e-89 OFAVBQ_DN203163_c0_g1_i1:2-1168(-)	0.061	0	2	1	1	1	1	389	43.3	7.05	0	1																Low	Low	Low	Low	Low	Low	Low	Low
OFAVBQ_DN222788_c1_g1_i5.p1	type:complete	(-),score=177.83,DHX36_BOVIN	High	52.864 0.0,HA2|PF04408.23|8.3e-20,Helicase_C|PF00271.31|8.7e-17,DEAD|PF00270.29|2e-11,AAA_22|PF13401.6|0.00015,NACHT|PF05729.12|0.0047,ATPase|PF06745.13|0.022,T2SSE|PF00437.20|0.044,AAA_14|PF13173.6|8.5e+02,AAA_14|PF13173.6|1.8,AAA_14|PF13173.6|1.1e+04,NB-ARC|PF00931.22|0.18,Phage_tail_APC|PF16778.5|0.24,AAA_16|PF13191.6|1.2e+04,AAA_16|PF13191.6|0.37,RsgA_GTPase|PF03193.16|0.4 OFAVBQ_DN222788_c1_…	0.061	0	1	1	1	1	1	906	103.2	7.81	0	1																Low	Not Found	Low	Low	Low	Low	Low	Low
OFAVBQ_DN197273_c11_g8_i1.p1			High	OFAVBQ_DN197273_c11_g8~~OFAVBQ_DN197273_c11_g8_i1.p1 ORF type:3prime_partial len:82 (+),score=2.17 OFAVBQ_DN197273_c11_g8_i1:240-482(+)	0.061	0	12	2	2	2	1	81	8.3	11	0	2																Low	Low	Low	Low	Low	Low	Low	Low
OFAVBQ_DN205111_c1_g2_i1.p1	type:complete	(-),score=95.35,NALD2_MOUSE	High	39.623 2.03e-176,TFR_dimer|PF04253.15|1.9e-20,Peptidase_M28|PF04389.17|6.7e-17,PA|PF02225.22|4.2e-10,PA|PF02225.22|2.3e+03,Peptidase_M20|PF01546.28|0.28 OFAVBQ_DN205111_c1_g2_i1:198-2069(-)	0.061	0	3	2	2	2	1	623	70.1	8.7	0	2																Low	Not Found	Low	Low	Low	Low	Low	Low
OFAVBQ_DN199501_c0_g1_i2.p1			High	OFAVBQ_DN199501_c0_g1~~OFAVBQ_DN199501_c0_g1_i2.p1 ORF type:complete len:86 (+),score=1.61 OFAVBQ_DN199501_c0_g1_i2:1006-1263(+)	0.061	0	9	1	1	1	1	85	9.9	8.06	0	1																Low	Low	Low	Low	Low	Low	Low	Low
OFAVBQ_DN210955_c8_g1_i1.p1	type:5prime_partial	(-),score=44.00,PTCD3_BOVIN	High	31.217 2.70e-15,RNase_J_C|PF17770.1|1.1,RNase_J_C|PF17770.1|5e+02,PPR_long|PF17177.4|0.13 OFAVBQ_DN210955_c8_g1_i1:1233-1886(-)	0.061	0	4	1	2	1	1	217	24.1	6.9	0	1																Low	Not Found	Low	Low	Low	Low	Low	Low
OFAVBQ_DN196116_c0_g1_i2.p1	type:complete	(-),score=59.01,G3ST1_MOUSE	High	29.310 7.39e-40,Gal-3-0_sulfotr|PF06990.11|5.5e-61,Gal-3-0_sulfotr|PF06990.11|3e+02 OFAVBQ_DN196116_c0_g1_i2:626-2176(-)	0.06	0	2	1	1	1	1	516	60.5	7.36	0	1																Low	Not Found	Low	Low	Low	Low	Low	Low
OFAVBQ_DN223598_c3_g1_i6.p1	type:complete	(-),score=26.24,TNFR_c6	High	PF00020.18 7.4,TNFR_c6|PF00020.18|1.3e-08,TNFR_c6|PF00020.18|0.54,DUF4006|PF13179.6|0.48 OFAVBQ_DN223598_c3_g1_i6:1701-2978(-)	0.06	0	2	1	2	1	1	425	47.5	8.73	0	1																Low	Low	Low	Low	Low	Low	Low	Low
OFAVBQ_DN202707_c2_g1_i17.p1			High	OFAVBQ_DN202707_c2_g1~~OFAVBQ_DN202707_c2_g1_i17.p1 ORF type:complete len:130 (-),score=24.10 OFAVBQ_DN202707_c2_g1_i17:242-631(-)	0.06	0	6	1	4	1	1	129	14.8	9.03	0	1																Low	Not Found	Low	Low	Low	Low	Low	Low
OFAVBQ_DN223834_c1_g3_i6.p1	type:complete	(-),score=181.42,HERC4_RAT	High	48.045 0.0,HECT|PF00632.25|7.4e+03,HECT|PF00632.25|2.6e-86,RCC1|PF00415.18|3.4e-09,RCC1|PF00415.18|9.7e-10,RCC1|PF00415.18|4.9e-13,RCC1|PF00415.18|6.1e-08,RCC1|PF00415.18|1.6e-14,RCC1|PF00415.18|2.3e-13,RCC1|PF00415.18|1.6e-06,RCC1_2|PF13540.6|41,RCC1_2|PF13540.6|2.2e-07,RCC1_2|PF13540.6|1e-07,RCC1_2|PF13540.6|1.2e-08,RCC1_2|PF13540.6|2.7e-08,RCC1_2|PF13540.6|3.9e-08,RCC1_2|PF13540.6|0.00013,RCC1…	0.06	0	1	1	1	1	1	1056	118.8	6.77	0	1																Low	Low	Low	Low	Low	Low	Low	Low
OFAVBQ_DN215846_c4_g1_i9.p2			High	OFAVBQ_DN215846_c4_g1~~OFAVBQ_DN215846_c4_g1_i9.p2 ORF type:complete len:93 (-),score=4.85 OFAVBQ_DN215846_c4_g1_i9:2929-3207(-)	0.06	0	10	1	1	1	1	92	10.3	8.51	0	1																Low	Low	Low	Low	Low	Low	Low	Low
OFAVBQ_DN206165_c2_g1_i1.p1			High	OFAVBQ_DN206165_c2_g1~~OFAVBQ_DN206165_c2_g1_i1.p1 ORF type:5prime_partial len:74 (-),score=1.05 OFAVBQ_DN206165_c2_g1_i1:189-410(-)	0.06	0	12	1	5	1	1	73	8.4	9	0	1																Low	Low	Low	Low	Low	Low	Low	Low
OFAVBQ_DN305550_c0_g1_i1.p1			High	OFAVBQ_DN305550_c0_g1~~OFAVBQ_DN305550_c0_g1_i1.p1 ORF type:internal len:106 (+),score=7.86 OFAVBQ_DN305550_c0_g1_i1:2-316(+)	0.059	0	10	1	1	1	1	105	11.8	8.38	0	1																Low	Low	Low	Low	Low	Low	Low	Low
OFAVBQ_DN218640_c2_g3_i1.p2	type:internal	(-),score=71.41,MYH7_RABIT	High	53.177 1.83e-105,Myosin_head|PF00063.21|2.5e-98,DUF4473|PF14747.6|2.6e+03,DUF4473|PF14747.6|1e+03,DUF4473|PF14747.6|1.4 OFAVBQ_DN218640_c2_g3_i1:2-889(-)	0.059	0	2	1	1	1	1	296	33.3	8.38	0	1																Low	Low	Low	Low	Low	Low	Low	Low
OFAVBQ_DN222537_c1_g1_i4.p1	type:complete	(-),score=88.93,RECQ5_HUMAN	High	57.839 0.0,Helicase_C|PF00271.31|1.2e+03,Helicase_C|PF00271.31|0.086,Helicase_C|PF00271.31|4.4e-16,DEAD|PF00270.29|1.5e-19,DEAD|PF00270.29|8.4e+02,RecQ_Zn_bind|PF16124.5|1.6e-09,ResIII|PF04851.15|6.3e-05,MTD|PF01993.18|0.064,SecA_DEAD|PF07517.14|0.48 OFAVBQ_DN222537_c1_g1_i4:2435-3877(-)	0.059	0	2	1	3	1	1	480	53.8	8.65	0	1																Low	Low	Low	Low	Low	Low	Low	Low
OFAVBQ_DN209935_c0_g1_i3.p1	type:complete	(-),score=23.24,NAD_binding_10	High	PF13460.6 1.3e-14 OFAVBQ_DN209935_c0_g1_i3:1047-1430(-)	0.059	0	6	1	2	1	1	127	14.4	7.34	0	1																Low	Low	Low	Low	Low	Low	Low	Low
OFAVBQ_DN116780_c0_g2_i1.p1	type:internal	(-),score=23.01,OPLA_DICDI	High	38.679 7.70e-21,Hydantoinase_A|PF01968.18|4e-05,Hydantoinase_A|PF01968.18|1.3e+03 OFAVBQ_DN116780_c0_g2_i1:3-317(-)	0.059	0	11	1	2	1	1	105	11.6	6.55	0	1																Not Found	Not Found	Low	Not Found	Low	Not Found	Low	Low
OFAVBQ_DN216543_c2_g1_i6.p1	type:complete	(-),score=56.45,CHSTE_HUMAN	High	41.566 2.04e-79,Sulfotransfer_2|PF03567.14|4.3e-53 OFAVBQ_DN216543_c2_g1_i6:704-1732(-)	0.059	0	3	1	1	1	1	342	39.2	9.22	0	1																Low	Low	Low	Low	Low	Low	Low	Low
OFAVBQ_DN224530_c2_g3_i1.p1	type:internal	(-),score=46.66,DD19A_BOVIN	High	61.702 4.45e-106,Helicase_C|PF00271.31|7e-14,DEAD|PF00270.29|1.9e-07 OFAVBQ_DN224530_c2_g3_i1:3-704(-)	0.059	0	4	1	1	1	1	234	26.7	5.9	0	1																Low	Not Found	Low	Low	Low	Not Found	Low	Low
OFAVBQ_DN131338_c0_g1_i1.p2			High	OFAVBQ_DN131338_c0_g1~~OFAVBQ_DN131338_c0_g1_i1.p2 ORF type:internal len:86 (+),score=16.53 OFAVBQ_DN131338_c0_g1_i1:2-256(+)	0.059	0	8	1	1	1	1	85	9.9	8.5	0	1																Low	Low	Low	Low	Low	Low	Low	Low
OFAVBQ_DN220403_c1_g1_i1.p1	type:complete	(-),score=78.08,KLH28_HUMAN	High	30.233 1.07e-71,KLH28_HUMAN|25.000|1.30e-12,Kelch_1|PF01344.25|1.2e+02,Kelch_1|PF01344.25|83,Kelch_1|PF01344.25|6.1e-07,Kelch_1|PF01344.25|5.6e-07,Kelch_1|PF01344.25|3.5e-10,Kelch_1|PF01344.25|1.6e-09,BACK|PF07707.15|1.3e+03,BACK|PF07707.15|3.3e-27,Kelch_6|PF13964.6|2e+03,Kelch_6|PF13964.6|4.1e+02,Kelch_6|PF13964.6|1.3e-05,Kelch_6|PF13964.6|0.00047,Kelch_6|PF13964.6|0.00012,Kelch_6|PF13964.6|0.55…	0.059	0	1	1	1	1	1	604	67.6	5.94	0	1																Low	Low	Low	Low	Low	Low	Low	Low
OFAVBQ_DN214804_c2_g1_i8.p1	type:complete	(-),score=125.43,RGRF1_MOUSE	High	47.170 3.67e-93,RGRF1_MOUSE|51.087|1.92e-69,RasGEF|PF00617.19|1.8e-57,RasGEF_N|PF00618.20|6.8e-14,RasGEF_N|PF00618.20|0.00048,PH|PF00169.29|0.0026,DUF4085|PF13315.6|0.017 OFAVBQ_DN214804_c2_g1_i8:955-3945(-)	0.059	0	2	2	2	2	1	996	110.9	8.85	0	2																Low	Low	Low	Low	Low	Low	Low	Low
OFAVBQ_DN201225_c0_g1_i1.p1	type:5prime_partial	(-),score=15.05,FXL15_HUMAN	High	36.822 4.61e-49,F-box|PF00646.33|0.002,F-box|PF00646.33|3.4e+03,F-box|PF00646.33|2e+03,F-box|PF00646.33|81,LRR_4|PF12799.7|2.6e+03,LRR_4|PF12799.7|66,LRR_4|PF12799.7|1.2,LRR_4|PF12799.7|58,LRR_4|PF12799.7|9.1e+03,F-box-like|PF12937.7|0.21,F-box-like|PF12937.7|2.4e+03,F-box-like|PF12937.7|3.3e+03,F-box-like|PF12937.7|7.8e+03,DUF5360|PF17314.2|2.5e+02,DUF5360|PF17314.2|4.4,DUF5360|PF17314.2|1.8e+03…	0.06	0	5	2	5	2	1	302	34.2	8.27	0	2	0.678	1.263	1.388	1.136	1.276	1.495	1.726	80.3	54.5	101.4	111.5	91.2	102.5	120.1	138.6	Low	Low	Low	Low	Low	Low	Low	Low
OFAVBQ_DN223237_c1_g1_i2.p1	type:complete	(-),score=781.76,FAT1_HUMAN	High	35.155 0.0,FAT1_HUMAN|26.271|2.67e-57,Cadherin|PF00028.17|4.2e-06,Cadherin|PF00028.17|1.4e-12,Cadherin|PF00028.17|1.8e-08,Cadherin|PF00028.17|5.7e-13,Cadherin|PF00028.17|7.2e-16,Cadherin|PF00028.17|3.3e-09,Cadherin|PF00028.17|1e-16,Cadherin|PF00028.17|5.3e-18,Cadherin|PF00028.17|3.5e-19,Cadherin|PF00028.17|9.1e-14,Cadherin|PF00028.17|2.9e-19,Cadherin|PF00028.17|0.0065,Cadherin|PF00028.17|4e-14,Ca…	0.06	0	1	3	3	3	1	4586	502.4	5.02	0	3																Low	Low	Low	Low	Low	Low	Low	Low
OFAVBQ_DN220796_c5_g1_i2.p1	type:complete	(-),score=180.10,ZN569_MOUSE	High	34.031 1.51e-76,ZN569_MOUSE|35.407|1.65e-57,ZN569_MOUSE|32.059|1.64e-49,zf-C2H2|PF00096.26|3e+02,zf-C2H2|PF00096.26|0.84,zf-C2H2|PF00096.26|2.8,zf-C2H2|PF00096.26|1.4e+02,zf-C2H2|PF00096.26|0.48,zf-C2H2|PF00096.26|3.9e-05,zf-C2H2|PF00096.26|0.00046,zf-C2H2|PF00096.26|7.6e-05,zf-C2H2|PF00096.26|0.059,zf-C2H2|PF00096.26|0.026,zf-C2H2|PF00096.26|8.7,zf-C2H2|PF00096.26|0.012,zf-C2H2|PF00096.26|0.0057…	0.061	0	3	2	2	2	1	896	100.3	8.78	0	2																Low	Not Found	Low	Low	Low	Low	Low	Low
OFAVBQ_DN206892_c6_g1_i4.p1	type:complete	(-),score=102.50,Chi-conotoxin	High	PF16981.5 0.25,Chi-conotoxin|PF16981.5|1.2e+04,Chi-conotoxin|PF16981.5|4.2e+03,SpoIIIAH|PF12685.7|0.25,SpoIIIAH|PF12685.7|40,SDA1|PF05285.12|1.7e+02,SDA1|PF05285.12|0.16,Gastrin|PF00918.17|0.48,Gastrin|PF00918.17|1.4e+04 OFAVBQ_DN206892_c6_g1_i4:268-1611(-)	0.06	0	2	1	2	1	1	447	49.4	5.35	0	1																Low	Not Found	Low	Low	Low	Low	Low	Low
OFAVBQ_DN219743_c1_g2_i5.p1	type:complete	(-),score=90.01,VEZA_HUMAN	High	24.480 6.06e-19,Vezatin|PF12632.7|4.7e-18 OFAVBQ_DN219743_c1_g2_i5:396-2468(-)	0.067	0	2	2	2	2	1	690	78.1	5.59	0	2																Low	Low	Low	Low	Low	Low	Low	Low
OFAVBQ_DN223176_c5_g1_i2.p1	type:complete	(-),score=93.33,FAST_1	High	PF06743.15 9e+02,FAST_1|PF06743.15|3.7e+03,FAST_1|PF06743.15|30,FAST_1|PF06743.15|3,FAST_1|PF06743.15|5.2e+03,FAST_1|PF06743.15|4.9e+03 OFAVBQ_DN223176_c5_g1_i2:463-2259(-)	0.068	0	1	1	1	1	1	598	67.1	8.02	0	1	3.382	18.85	11.627	2.302	0.809	0.808	0.733	20.2	68.5	381.7	235.4	46.6	16.4	16.4	14.8	Low	Low	Low	Low	Low	Low	Low	Low
OFAVBQ_DN287099_c0_g1_i1.p1			High	OFAVBQ_DN287099_c0_g1~~OFAVBQ_DN287099_c0_g1_i1.p1 ORF type:5prime_partial len:82 (+),score=1.97 OFAVBQ_DN287099_c0_g1_i1:3-248(+)	0.068	0	7	1	1	1	1	81	8.9	10.13	0	1																Low	Low	Low	Low	Low	Low	Low	Low
OFAVBQ_DN217308_c5_g1_i1.p1	type:complete	(-),score=169.41,DOK1_BOVIN	High	36.111 9.34e-09,IRS|PF02174.17|5.3e-18,PH|PF00169.29|8.3e-06 OFAVBQ_DN217308_c5_g1_i1:1671-4415(-)	0.049	0	3	3	7	3	1	914	100.6	8.47	0	3	0.754	0.557	0.842	0.759	0.642	0.83	0.687	131.8	99.3	73.3	110.9	100.1	84.6	109.4	90.6	Low	Low	Low	Low	Low	Low	Low	Low
OFAVBQ_DN214088_c5_g2_i2.p1	type:complete	(-),score=25.64,Glyco_hydro_4	High	PF02056.16 0.073 OFAVBQ_DN214088_c5_g2_i2:1009-1890(-)	0.049	0	6	2	2	2	1	293	32.5	9.92	0	2																Low	Not Found	Low	Low	Low	Low	Low	Low
OFAVBQ_DN210207_c1_g1_i1.p1	type:5prime_partial	(-),score=75.74,CTP5C_RAT	High	37.864 4.19e-32,I-set|PF07679.16|2.9e-13,I-set|PF07679.16|3.7e-16,I-set|PF07679.16|0.12,Ig_3|PF13927.6|3.4e-13,Ig_3|PF13927.6|3.7e-14,Ig_3|PF13927.6|0.017,ig|PF00047.25|2.8e-06,ig|PF00047.25|4.1e-08,ig|PF00047.25|0.0095,Ig_2|PF13895.6|5.1e-05,Ig_2|PF13895.6|6.1e-10,Ig_2|PF13895.6|0.26,Ig_2|PF13895.6|8.7e+03,V-set|PF07686.17|82,V-set|PF07686.17|0.98,V-set|PF07686.17|0.13,V-set|PF07686.17|0.48,V-se…	0.049	0	1	1	1	1	1	650	70.6	8.78	0	1																Low	Low	Low	Low	Low	Low	Low	Low
OFAVBQ_DN223756_c3_g1_i2.p1	type:3prime_partial	(-),score=116.36,FA8_PIG	High	26.537 4.63e-19,FA8_PIG|28.485|4.49e-09,F5_F8_type_C|PF00754.25|1.4e-11,F5_F8_type_C|PF00754.25|4.4e-05,F5_F8_type_C|PF00754.25|1.5e+03,EGF|PF00008.27|0.0049,hEGF|PF12661.7|0.15,EGF_2|PF07974.13|2.6,Laminin_EGF|PF00053.24|4.6e+03,Laminin_EGF|PF00053.24|2.1 OFAVBQ_DN223756_c3_g1_i2:3-2090(-)	0.05	0	1	1	2	1	1	696	78.2	6.84	0	1																Low	Low	Low	Low	Low	Low	Low	Low
OFAVBQ_DN110019_c0_g1_i1.p1	type:3prime_partial	(-),score=1.00,RL31_CYAPA	High	61.765 3.50e-24,Ribosomal_L31e|PF01198.19|5e-28 OFAVBQ_DN110019_c0_g1_i1:3-215(-)	0.049	0	8	1	2	1	1	71	8.2	11.93	0	1																Low	Low	Low	Low	Low	Low	Low	Low
OFAVBQ_DN209959_c0_g1_i6.p1	type:complete	(-),score=140.80,ITB1_HUMAN	High	39.477 2.16e-154,Integrin_beta|PF00362.18|7.4e-98,PSI_integrin|PF17205.3|1.9e-11,PSI_integrin|PF17205.3|1.8e+04,PSI_integrin|PF17205.3|1.8e+04,PSI_integrin|PF17205.3|1.8e+04,PSI_integrin|PF17205.3|8.7e+03,I-EGF_1|PF18372.1|1.6e+04,I-EGF_1|PF18372.1|4.7e+03,I-EGF_1|PF18372.1|1.7e-09,I-EGF_1|PF18372.1|1.6e+04,I-EGF_1|PF18372.1|0.009,I-EGF_1|PF18372.1|3.6e+03,I-EGF_1|PF18372.1|6.5e+03,I-EGF_1|PF1837…	0.049	0	4	3	3	3	1	736	80.8	5.41	0	3																Low	Low	Low	Low	Low	Low	Low	Low
OFAVBQ_DN221873_c1_g1_i3.p2			High	OFAVBQ_DN221873_c1_g1~~OFAVBQ_DN221873_c1_g1_i3.p2 ORF type:complete len:95 (+),score=1.61 OFAVBQ_DN221873_c1_g1_i3:1755-2039(+)	0.049	0	9	1	1	1	1	94	10.8	9.77	0	1																Low	Not Found	Low	Low	Low	Low	Low	Low
OFAVBQ_DN225225_c2_g1_i1.p2	type:complete	(+),score=9.55,DUF2477	High	PF10631.9 0.037 OFAVBQ_DN225225_c2_g1_i1:795-1085(+)	0.049	0	8	1	1	1	1	96	10.6	9.74	0	1																Low	Not Found	Low	Low	Low	Low	Low	Low
OFAVBQ_DN200661_c2_g2_i2.p4			High	OFAVBQ_DN200661_c2_g2~~OFAVBQ_DN200661_c2_g2_i2.p4 ORF type:complete len:81 (-),score=2.73 OFAVBQ_DN200661_c2_g2_i2:1267-1509(-)	0.049	0	10	1	1	1	1	80	9.3	9.89	0	1																Low	Low	Low	Low	Low	Low	Low	Low
OFAVBQ_DN214865_c1_g1_i10.p1	type:3prime_partial	(-),score=78.59,TNFR_c6	High	PF00020.18 0.14,TNFR_c6|PF00020.18|6.1e-08,TNFR_c6|PF00020.18|0.14,TNFR_c6|PF00020.18|5.7e+03,TNFR_c6|PF00020.18|3.6,TNFR_c6|PF00020.18|0.0003,TNFR_c6|PF00020.18|1.2e+02,UPA|PF17217.3|5e+03,UPA|PF17217.3|0.11 OFAVBQ_DN214865_c1_g1_i10:1-1773(-)	0.049	0	1	1	1	1	1	591	65.8	7.31	0	1																Low	Low	Low	Low	Low	Low	Low	Low
OFAVBQ_DN208971_c1_g2_i9.p1	type:complete	(-),score=31.27,ADRB2_TSCTR	High	31.707 7.27e-28,7tm_1|PF00001.21|4.1e-38,7tm_4|PF13853.6|4.4e-08,7TM_GPCR_Srsx|PF10320.9|2e-05,7TM_GPCR_Srx|PF10328.9|0.00015,7TM_GPCR_Srx|PF10328.9|1.3e+03,DUF5305|PF17231.2|1.8,DUF5305|PF17231.2|3.9,DUF5316|PF17247.2|3.2e+02,DUF5316|PF17247.2|6.1e+03,DUF5316|PF17247.2|3.5 OFAVBQ_DN208971_c1_g2_i9:535-1608(-)	0.049	0	2	1	1	1	1	357	40.9	8.94	0	1																Low	Low	Low	Low	Low	Low	Low	Low
OFAVBQ_DN224619_c1_g1_i1.p6			High	OFAVBQ_DN224619_c1_g1~~OFAVBQ_DN224619_c1_g1_i1.p6 ORF type:complete len:76 (-),score=9.98 OFAVBQ_DN224619_c1_g1_i1:1347-1574(-)	0.049	0	15	1	2	1	1	75	8.7	9.01	0	1																Low	Not Found	Low	Low	Low	Low	Low	Low
OFAVBQ_DN224129_c4_g1_i4.p1	type:3prime_partial	(+),score=50.52,RAMP4	High	PF06624.12 1e+03,RAMP4|PF06624.12|11 OFAVBQ_DN224129_c4_g1_i4:1716-3014(+)	0.049	0	2	1	8	1	1	433	50.6	9.54	0	1																Low	Low	Low	Low	Low	Low	Low	Low
OFAVBQ_DN225399_c5_g1_i6.p1	type:complete	(-),score=2795.10,MACF1_HUMAN	High	26.957 0.0,MACF1_HUMAN|20.048|2.09e-85,MACF1_HUMAN|19.682|1.85e-57,MACF1_HUMAN|24.575|6.92e-52,MACF1_HUMAN|19.318|1.35e-38,MACF1_HUMAN|19.465|6.72e-30,MACF1_HUMAN|20.721|1.29e-26,MACF1_HUMAN|18.792|3.56e-24,MACF1_HUMAN|21.586|1.81e-18,MACF1_HUMAN|19.287|3.73e-17,Spectrin|PF00435.21|5.4e-05,Spectrin|PF00435.21|73,Spectrin|PF00435.21|16,Spectrin|PF00435.21|49,Spectrin|PF00435.21|0.00045,Spectrin|PF…	0.049	0	1	8	16	8	1	10859	1236.9	4.96	0	8	1.047	1.14	1.239	1.333	1.179	1.423	1.699	79.5	83.3	90.6	98.5	106	93.8	113.2	135.1	Low	Low	Low	Low	Low	Low	Low	Low
OFAVBQ_DN225025_c1_g1_i1.p2	type:3prime_partial	(-),score=66.30,Asp_protease_2	High	PF13650.6 0.00014,gag-asp_proteas|PF13975.6|0.068 OFAVBQ_DN225025_c1_g1_i1:1-2385(-)	0.049	0	2	2	2	2	1	795	88.9	7.96	0	2																Low	Low	Low	Low	Low	Low	Low	Low
OFAVBQ_DN218974_c0_g1_i3.p1	type:5prime_partial	(-),score=20.26,TM165_HUMAN	High	73.043 3.92e-54,UPF0016|PF01169.19|7.1e-21,Mntp|PF02659.15|0.0014,TerC|PF03741.16|0.17,TerC|PF03741.16|0.023 OFAVBQ_DN218974_c0_g1_i3:2420-2962(-)	0.052	0	3	1	1	1	1	180	19.8	5.05	0	1																Low	Not Found	Low	Low	Low	Not Found	Not Found	Low
OFAVBQ_DN217908_c3_g4_i2.p1	type:5prime_partial	(-),score=41.46,TRPA1_HUMAN	High	32.031 1.23e-10,Hemerythrin|PF01814.23|0.055 OFAVBQ_DN217908_c3_g4_i2:1178-1744(-)	0.052	0	9	1	2	1	1	188	21.3	4.83	0	1																Not Found	Not Found	Not Found	Low	Not Found	Not Found	Not Found	Not Found
OFAVBQ_DN209678_c2_g1_i2.p1	type:5prime_partial	(-),score=62.49,ODPA_BOVIN	High	61.856 2.12e-179,E1_dh|PF00676.20|5.7e-120,TPP_enzyme_C|PF02775.21|0.00055,TPP_enzyme_C|PF02775.21|8.2e+02,DXP_synthase_N|PF13292.6|0.00094 OFAVBQ_DN209678_c2_g1_i2:1080-2354(-)	0.052	0	2	1	1	1	1	424	47	7.39	0	1																Low	Low	Low	Low	Low	Low	Low	Low
OFAVBQ_DN212729_c0_g2_i7.p1	type:complete	(-),score=197.04,SDCG8_DANRE	High	28.340 1.64e-39,SDCG8_DANRE|29.744|1.68e-07,CCCAP|PF15964.5|5.4e-13,CCCAP|PF15964.5|1.2e-61,MtrB|PF05440.12|1.5e+04,MtrB|PF05440.12|0.77 OFAVBQ_DN212729_c0_g2_i7:557-3001(-)	0.049	0	1	1	2	1	1	814	93.8	6.02	0	1	1.046	0.867	0.823	0.879	0.642	0.483	0.581	126.6	132.5	109.8	104.1	111.3	81.2	61.1	73.5	Low	Low	Low	Low	Low	Low	Low	Low
OFAVBQ_DN220762_c0_g2_i4.p1	type:internal	(-),score=383.13,HMCN1_HUMAN	High	25.584 1.93e-178,HMCN1_HUMAN|25.909|2.07e-172,HMCN1_HUMAN|26.089|2.54e-172,HMCN1_HUMAN|25.463|2.76e-168,HMCN1_HUMAN|25.971|1.30e-162,HMCN1_HUMAN|24.869|9.44e-157,HMCN1_HUMAN|24.474|1.02e-156,HMCN1_HUMAN|26.006|7.34e-152,HMCN1_HUMAN|24.310|3.24e-135,HMCN1_HUMAN|24.447|3.11e-123,HMCN1_HUMAN|24.105|1.18e-80,HMCN1_HUMAN|26.800|3.43e-57,HMCN1_HUMAN|23.954|2.26e-07,I-set|PF07679.16|1.2e-12,I-set|PF0767…	0.055	0	3	5	8	5	1	2232	238.4	5.11	0	5	1.214	0.799	1.239	0.995	1.2	1.135	1.552	87.6	106.3	70	108.6	87.2	105.1	99.4	135.9	Low	Low	Low	Low	Low	Low	Low	Low
OFAVBQ_DN223256_c4_g3_i2.p1	type:5prime_partial	(-),score=18.45,PAN_1	High	PF00024.26 2.1e-05,PAN_2|PF08276.11|0.024,PAN_4|PF14295.6|0.15,Synaptobrevin|PF00957.21|80,Synaptobrevin|PF00957.21|12 OFAVBQ_DN223256_c4_g3_i2:3-437(-)	0.049	0	6	1	1	1	1	144	15.5	8.48	0	1																Low	Not Found	Low	Low	Low	Low	Low	Low
OFAVBQ_DN203557_c2_g2_i1.p1			High	OFAVBQ_DN203557_c2_g2~~OFAVBQ_DN203557_c2_g2_i1.p1 ORF type:5prime_partial len:386 (-),score=62.96 OFAVBQ_DN203557_c2_g2_i1:632-1789(-)	0.049	0	2	1	12	1	1	385	44	4.94	0	1																Low	Not Found	Low	Low	Low	Low	Low	Low
OFAVBQ_DN199964_c2_g2_i1.p1	type:internal	(-),score=52.43,SVEP1_HUMAN	High	23.404 1.41e-13,Ephrin_rec_like|PF07699.13|4.4e+03,Ephrin_rec_like|PF07699.13|2.2e-06 OFAVBQ_DN199964_c2_g2_i1:1-963(-)	0.048	0	5	2	3	1	1	321	35.6	5.15	0	2																Low	Low	Low	Low	Low	Low	Low	Low
OFAVBQ_DN248919_c0_g1_i1.p1	type:5prime_partial	(-),score=35.21,RS27A_CHICK	High	92.308 2.76e-92,ubiquitin|PF00240.23|3.5e-34,Ribosomal_S27|PF01599.19|6.9e-25,Rad60-SLD|PF11976.8|1e-16,Rad60-SLD|PF11976.8|8.3e+03,Ubiquitin_2|PF14560.6|3.4e-05,Rad60-SLD_2|PF13881.6|0.00035,TBK1_ULD|PF18396.1|0.0058,DUF2407|PF10302.9|0.0099,Ubiquitin_5|PF18037.1|0.0097,Ubiquitin_5|PF18037.1|1.9e+03,Ubiquitin_4|PF18036.1|14,Ubiquitin_4|PF18036.1|11,Ubiquitin_4|PF18036.1|8.6e+03 OFAVBQ_DN248919_c…	0.049	0	5	1	1	1	1	170	19.5	9.58	0	1																Low	Not Found	Low	Low	Low	Low	Low	Low
OFAVBQ_DN205368_c0_g1_i4.p1	type:complete	(-),score=70.90,MMP16_HUMAN	High	33.779 8.64e-80,Peptidase_M10|PF00413.24|1.5e-51,Hemopexin|PF00045.19|0.44,Hemopexin|PF00045.19|5.9e-07,Hemopexin|PF00045.19|8.4e-14,Hemopexin|PF00045.19|2.1e-05,PG_binding_1|PF01471.18|1.5e-06,Reprolysin_3|PF13582.6|0.014,Peptidase_M66|PF10462.9|0.07,DUF4953|PF16313.5|0.2,DUF4953|PF16313.5|3.3e+03,Astacin|PF01400.24|3.9e+02,Astacin|PF01400.24|2 OFAVBQ_DN205368_c0_g1_i4:506-2068(-)	0.049	0	1	1	1	1	1	520	59.5	9.94	0	1																Low	Low	Low	Low	Low	Low	Low	Low
OFAVBQ_DN211848_c3_g1_i4.p1	type:complete	(-),score=61.38,DTX2_MOUSE	High	43.312 2.93e-31,DTX2_MOUSE|34.940|6.17e-26,WWE|PF02825.20|7.7e-13,WWE|PF02825.20|2.3e-09,zf-C3HC4|PF00097.25|1.5e-06,DTC|PF18102.1|1e-05,zf-rbx1|PF12678.7|3.1e-05,zf-RING_UBOX|PF13445.6|0.00017,zf-RING_5|PF14634.6|0.00037,zf-RING_2|PF13639.6|0.0013,zf-C3HC4_2|PF13923.6|2.1e+02,zf-C3HC4_2|PF13923.6|0.0059,zf-RING_11|PF17123.5|52,zf-RING_11|PF17123.5|0.1,zf-ANAPC11|PF12861.7|0.49,Zn_ribbon_17|PF171…	0.048	0	2	1	1	1	1	362	40	8.85	0	1																Low	Not Found	Low	Low	Low	Low	Low	Low
OFAVBQ_DN213869_c5_g1_i7.p2	type:complete	(-),score=51.72,SVEP1_RAT	High	29.462 5.89e-40,SVEP1_RAT|32.571|6.15e-17,SVEP1_RAT|30.726|1.82e-11,SVEP1_RAT|28.177|2.62e-11,SVEP1_RAT|27.053|7.85e-11,SVEP1_RAT|26.630|2.14e-09,SVEP1_RAT|27.746|3.70e-09,SVEP1_RAT|30.457|2.92e-08,SVEP1_RAT|25.000|1.55e-07,SVEP1_RAT|27.861|1.68e-07,SVEP1_RAT|26.190|5.60e-07,SVEP1_RAT|23.977|1.09e-06,SVEP1_RAT|26.316|1.14e-06,SVEP1_RAT|30.833|2.27e-06,SVEP1_RAT|27.742|2.44e-06,HYR|PF02494.16|5.6e…	0.048	0	2	1	2	1	1	363	40.2	6	0	1																Low	Low	Low	Low	Low	Low	Low	Low
OFAVBQ_DN203187_c1_g2_i1.p1			High	OFAVBQ_DN203187_c1_g2~~OFAVBQ_DN203187_c1_g2_i1.p1 ORF type:internal len:172 (-),score=3.12 OFAVBQ_DN203187_c1_g2_i1:2-514(-)	0.048	0	8	1	1	1	1	171	19	9.09	0	1																Low	Low	Low	Low	Low	Low	Low	Low
OFAVBQ_DN123653_c0_g1_i1.p1	type:internal	(-),score=11.61,EF1B_HUMAN	High	72.581 9.65e-27,GST_C_6|PF17171.4|0.0024,GST_C_2|PF13410.6|0.057,GST_C_3|PF14497.6|0.11 OFAVBQ_DN123653_c0_g1_i1:3-245(-)	0.048	0	9	1	2	1	1	81	9.1	8.44	0	1																Low	Low	Low	Low	Low	Low	Low	Low
OFAVBQ_DN21838_c0_g1_i1.p1			High	OFAVBQ_DN21838_c0_g1~~OFAVBQ_DN21838_c0_g1_i1.p1 ORF type:internal len:72 (-),score=5.30 OFAVBQ_DN21838_c0_g1_i1:1-213(-)	0.048	0	11	1	1	1	1	71	7.6	10.17	0	1																Low	Low	Low	Low	Low	Low	Low	Low
OFAVBQ_DN216308_c0_g1_i9.p1	type:complete	(-),score=186.65,SCN1_HETBL	High	45.329 0.0,SCN1_HETBL|49.091|9.77e-92,SCN1_HETBL|25.606|3.52e-31,SCN1_HETBL|25.745|4.72e-22,SCN1_HETBL|24.096|3.84e-16,SCN1_HETBL|26.772|1.60e-09,SCN1_HETBL|30.601|1.99e-09,SCN1_HETBL|20.173|3.68e-09,Ion_trans|PF00520.31|1.6e-71,Ion_trans|PF00520.31|1.2e-52,Ion_trans|PF00520.31|1.1e-67,Ion_trans|PF00520.31|3.7e-52,PKD_channel|PF08016.12|3.7,PKD_channel|PF08016.12|0.22,PKD_channel|PF08016.12|0.06,…	0.049	0	0	1	1	1	1	1923	217	8.65	0	1																Low	Not Found	Low	Low	Low	Low	Low	Low
OFAVBQ_DN197599_c0_g1_i2.p1	type:complete	(-),score=18.40,UPAR_LY6_2	High	PF16975.5 4.2e-06,UPAR_LY6|PF00021.21|1.5e-05,PLA2_inh|PF02988.15|0.13 OFAVBQ_DN197599_c0_g1_i2:244-621(-)	0.048	0	23	1	1	1	1	125	13.4	5.24	0	1																Low	Low	Low	Low	Low	Low	Low	Low
OFAVBQ_DN213804_c0_g1_i3.p1	type:complete	(-),score=17.70,Arif-1	High	PF06770.11 0.0045 OFAVBQ_DN213804_c0_g1_i3:2454-3032(-)	0.048	0	4	1	1	1	1	192	21.2	8.19	0	1																Low	Low	Low	Low	Low	Low	Low	Low
OFAVBQ_DN218663_c0_g5_i2.p1	type:5prime_partial	(-),score=19.85,GRDP1_ARATH	High	39.062 2.14e-08,fn3|PF00041.21|0.013 OFAVBQ_DN218663_c0_g5_i2:136-624(-)	0.048	0	4	1	1	1	1	162	18.4	9.45	0	1	1.178	1.061	0.671	0.913	0.642	0.913	0.73	112.5	132.6	119.4	75.6	102.7	72.3	102.7	82.2	Low	Low	Low	Low	Low	Low	Low	Low
OFAVBQ_DN213882_c0_g1_i3.p6	type:complete	(+),score=-5.55,DUF1985	High	PF09331.11 0.049 OFAVBQ_DN213882_c0_g1_i3:5361-5576(+)	0.048	0	24	1	1	1	1	71	8.3	11.22	0	1	1.809	1.481	0.616	0.968	1.084	0.59	1.217	91.3	165.1	135.2	56.2	88.4	98.9	53.8	111.1	Low	Low	Low	Low	Low	Low	Low	Low
OFAVBQ_DN202783_c4_g1_i4.p2	type:complete	(-),score=16.63,SNX8_HUMAN	High	52.174 1.90e-28,PX|PF00787.24|2.8e-11 OFAVBQ_DN202783_c4_g1_i4:3034-3333(-)	0.048	0	8	1	2	1	1	99	11.5	10.48	0	1																Low	Low	Low	Low	Low	Low	Low	Low
OFAVBQ_DN213680_c0_g1_i1.p1	type:complete	(-),score=145.35,ATRIP_MOUSE	High	29.771 2.67e-07,DUF2730|PF10805.8|0.15,DUF2730|PF10805.8|2.7e+02,Nup54_57_C|PF18570.1|0.25,Nup54_57_C|PF18570.1|6.2e+03,XLF|PF09302.11|0.14,XLF|PF09302.11|8.3e+03 OFAVBQ_DN213680_c0_g1_i1:206-2434(-)	0.049	0	2	2	3	2	1	742	83.3	5.53	0	2																Low	Low	Low	Low	Low	Low	Low	Low
OFAVBQ_DN225494_c7_g1_i4.p1	type:internal	(-),score=281.21,RN213_MOUSE	High	41.948 0.0,RN213_MOUSE|34.892|1.13e-35,AAA_5|PF07728.14|1.4e+03,AAA_5|PF07728.14|5.4e-06,AAA_22|PF13401.6|3.9,AAA_22|PF13401.6|0.21,AAA|PF00004.29|3.3e+03,AAA|PF00004.29|0.058,ABC_tran|PF00005.27|0.077,UBA_6|PF18039.1|5.2e+03,UBA_6|PF18039.1|0.2,UBA_6|PF18039.1|1.9e+02,AAA_14|PF13173.6|2.1e+03,AAA_14|PF13173.6|0.35,AAA_7|PF12775.7|3.1e+03,AAA_7|PF12775.7|0.17,MCM|PF00493.23|0.17 OFAVBQ_DN225494_c…	0.049	0	1	1	1	1	1	1495	168.8	5.62	0	1																Low	Not Found	Low	Low	Low	Low	Low	Low
OFAVBQ_DN215987_c2_g1_i12.p1	type:complete	(-),score=315.77,SI1L2_MOUSE	High	53.015 0.0,SI1L2_MOUSE|43.750|3.55e-08,Rap_GAP|PF02145.15|2.5e-66,PDZ_6|PF17820.1|8.3e-08,PDZ|PF00595.24|1.5e-05 OFAVBQ_DN215987_c2_g1_i12:1715-7087(-)	0.049	0	3	3	6	3	1	1790	197.2	9.29	0	3	1.019	1.11	0.86	0.968	0.688	1.138	0.865	104.6	106.6	116.1	89.9	101.3	72	119	90.5	Low	Low	Low	Low	Low	Low	Low	Low
OFAVBQ_DN207128_c5_g4_i2.p1	type:complete	(-),score=202.16,HMOX2_RAT	High	42.361 7.91e-71,Heme_oxygenase|PF01126.20|2.2e-74,CART|PF06373.11|16,CART|PF06373.11|71,zf-TRAF|PF02176.18|1.5,zf-TRAF|PF02176.18|1.6e+04,zf-TRAF|PF02176.18|42,zf-TRAF|PF02176.18|21,zf-TRAF|PF02176.18|1.8e+04,Preseq_ALAS|PF09029.10|1.1e+03,Preseq_ALAS|PF09029.10|0.54,Preseq_ALAS|PF09029.10|5.7e+02,Preseq_ALAS|PF09029.10|3.4e+02 OFAVBQ_DN207128_c5_g4_i2:638-2752(-)	0.049	0	2	1	1	1	1	704	79.4	5.68	0	1																Low	Not Found	Low	Low	Low	Low	Low	Low
OFAVBQ_DN223332_c7_g3_i4.p1			High	OFAVBQ_DN223332_c7_g3~~OFAVBQ_DN223332_c7_g3_i4.p1 ORF type:complete len:181 (-),score=51.81 OFAVBQ_DN223332_c7_g3_i4:740-1282(-)	0.048	0	6	1	2	1	1	180	19.5	8.92	0	1																Low	Not Found	Low	Low	Low	Low	Low	Low
OFAVBQ_DN209227_c1_g3_i2.p1	type:complete	(-),score=138.79,NECA_HYDVU	High	51.300 0.0,Peptidase_S8|PF00082.22|1.4e-45,Peptidase_S8|PF00082.22|3e+03,P_proprotein|PF01483.20|9.2e-18,P_proprotein|PF01483.20|7.2e+03,S8_pro-domain|PF16470.5|2.6e-17,Peptidase_S8_N|PF16361.5|0.028,CIA30|PF08547.12|0.31,CIA30|PF08547.12|3.2e+03 OFAVBQ_DN209227_c1_g3_i2:2388-4511(-)	0.055	0	2	2	7	2	1	707	79.4	5.27	0	2																Low	Low	Low	Low	Low	Low	Low	Low
OFAVBQ_DN221180_c0_g2_i2.p1	type:complete	(-),score=477.09,PH	High	PF00169.29 3.5e-07,PH|PF00169.29|5.8e+03,PH|PF00169.29|2.6e+03,PH|PF00169.29|4.7e+03,Fez1|PF06818.15|5e+03,Fez1|PF06818.15|0.00029,Fez1|PF06818.15|1.8e+04,Fez1|PF06818.15|1.2,Fez1|PF06818.15|19,Fez1|PF06818.15|1.8e+04,Fez1|PF06818.15|1.1e+04,Fez1|PF06818.15|2.8e+02,Fez1|PF06818.15|1.8e+04,Fez1|PF06818.15|1.8e+04,Fez1|PF06818.15|3.5e+02,PRKG1_interact|PF15898.5|9.6e+03,PRKG1_interact|PF15898.5|1.1…	0.055	0	0	1	1	1	1	1996	231	5.48	0	1																Low	Low	Low	Low	Low	Low	Low	Low
OFAVBQ_DN197947_c3_g1_i1.p2	type:5prime_partial	(+),score=5.91,TnsE_C	High	PF18623.1 0.056 OFAVBQ_DN197947_c3_g1_i1:2-229(+)	0.055	0	31	1	1	1	1	75	8.7	5.29	0	1																Not Found	Not Found	Not Found	Not Found	Not Found	Not Found	Not Found	Not Found
OFAVBQ_DN41016_c0_g1_i1.p1	type:complete	(-),score=33.50,RL35A_PONAB	High	70.000 1.58e-50,Ribosomal_L35Ae|PF01247.18|2.8e-45,RimM|PF01782.18|77,RimM|PF01782.18|3.2 OFAVBQ_DN41016_c0_g1_i1:47-421(-)	0.056	0	5	1	39	1	1	124	14.1	10.56	0	1																Low	Low	Low	Low	Low	Low	Low	Low
OFAVBQ_DN212778_c1_g1_i1.p1			High	OFAVBQ_DN212778_c1_g1~~OFAVBQ_DN212778_c1_g1_i1.p1 ORF type:internal len:100 (+),score=8.23 OFAVBQ_DN212778_c1_g1_i1:3-299(+)	0.056	0	6	1	1	1	1	99	11.3	8.51	0	1																Low	Low	Low	Low	Low	Low	Low	Low
OFAVBQ_DN210050_c0_g1_i1.p3			High	OFAVBQ_DN210050_c0_g1~~OFAVBQ_DN210050_c0_g1_i1.p3 ORF type:complete len:139 (+),score=4.26 OFAVBQ_DN210050_c0_g1_i1:1770-2186(+)	0.056	0	5	1	1	1	1	138	15.8	9.7	0	1																Low	Not Found	Low	Low	Low	Low	Low	Low
OFAVBQ_DN216671_c5_g1_i11.p1	type:internal	(-),score=48.68,HOS4_YEAST	High	39.130 4.63e-09,Ank_5|PF13857.6|4.5e-06,Ank_5|PF13857.6|2.5e-05,Ank_2|PF12796.7|2.5e-10,Ank|PF00023.30|0.086,Ank|PF00023.30|0.0044,Ank_3|PF13606.6|0.66,Ank_3|PF13606.6|0.0018,Ank_4|PF13637.6|2.5e-06,Ank_4|PF13637.6|47,Med30|PF11315.8|3,Med30|PF11315.8|19,CCD48|PF15799.5|23,CCD48|PF15799.5|0.12,CCT_2|PF09425.10|26,CCT_2|PF09425.10|26,CCT_2|PF09425.10|7.1e+03,Seryl_tRNA_N|PF02403.22|4.3,Seryl_tRNA_…	0.056	0	4	1	1	1	1	202	22.8	8.24	0	1																Low	Not Found	Low	Low	Low	Low	Low	Low
OFAVBQ_DN222845_c0_g2_i1.p1	type:complete	(-),score=251.93,TRAF6_DANRE	High	31.579 4.40e-08,Cadherin-like|PF12733.7|9.3e-16,Cadherin-like|PF12733.7|2.2e-14,TPR_11|PF13414.6|0.0032,TPR_11|PF13414.6|0.0012,TPR_11|PF13414.6|1.3e+02,TPR_11|PF13414.6|4.7e+02,TPR_11|PF13414.6|1.3e+03,TPR_14|PF13428.6|56,TPR_14|PF13428.6|20,TPR_14|PF13428.6|8.9e+03,TPR_14|PF13428.6|3.5e+03,TPR_14|PF13428.6|0.14,TPR_17|PF13431.6|10,TPR_17|PF13431.6|9.6,TPR_17|PF13431.6|19,TPR_17|PF13431.6|3.2e+0…	0.056	0	1	2	2	2	1	1194	130.3	7.62	0	2																Low	Low	Low	Low	Low	Low	Low	Low
OFAVBQ_DN171840_c0_g1_i1.p1	type:complete	(-),score=11.20,DUF3644	High	PF12358.8 0.083,MHB|PF16525.5|0.11,HTH_ABP1_N|PF18107.1|1.4,HTH_ABP1_N|PF18107.1|89 OFAVBQ_DN171840_c0_g1_i1:152-412(-)	0.056	0	8	1	1	1	1	86	10.6	11.22	0	1																Low	Low	Low	Low	Low	Low	Low	Low
OFAVBQ_DN213067_c0_g1_i1.p3	type:complete	(-),score=49.65,POL_CERV	High	32.800 5.29e-07,Dam|PF05869.11|4.7e-09,RT_RNaseH|PF17917.1|0.16,RT_RNaseH_2|PF17919.1|0.71,PCIF1_WW|PF12237.8|0.22 OFAVBQ_DN213067_c0_g1_i1:479-1774(-)	0.055	0	3	1	1	1	1	431	48.1	8.41	0	1																Not Found	Not Found	Low	Low	Low	Not Found	Low	Low
OFAVBQ_DN218585_c1_g4_i4.p1	type:complete	(-),score=70.79,BACH_RAT	High	55.988 1.39e-116,BACH_RAT|26.012|4.91e-09,4HBT|PF03061.22|2.1e-10,4HBT|PF03061.22|1.3e-15,tRNA_anti-codon|PF01336.25|0.28 OFAVBQ_DN218585_c1_g4_i4:1260-2231(-)	0.056	0	2	1	1	1	1	323	36.1	7.83	0	1																Low	Low	Low	Low	Low	Low	Low	Low
OFAVBQ_DN210237_c10_g3_i1.p1	type:3prime_partial	(+),score=43.53,APOBEC4_like	High	PF18774.1 5.9e-15,APOBEC4_like|PF18774.1|42,APOBEC_N|PF08210.11|6.9e-08,NHL|PF01436.21|0.00044,NHL|PF01436.21|2e+03,NHL|PF01436.21|2.5e+03,APOBEC4|PF18775.1|0.058,E3_UbLigase_RBR|PF18091.1|0.11 OFAVBQ_DN210237_c10_g3_i1:1319-2506(+)	0.056	0	2	1	1	1	1	396	44.9	8.4	0	1																Low	Not Found	Low	Low	Low	Low	Low	Low
OFAVBQ_DN215612_c0_g1_i3.p1	type:complete	(-),score=22.70,Endonuclease_NS	High	PF01223.23 6.1e-18 OFAVBQ_DN215612_c0_g1_i3:1102-1761(-)	0.055	0	5	1	1	1	1	219	24.8	9.7	0	1																Low	Not Found	Low	Low	Not Found	Not Found	Not Found	Not Found
OFAVBQ_DN199048_c0_g2_i1.p1	type:complete	(+),score=14.96,N-SET	High	PF11764.8 0.015 OFAVBQ_DN199048_c0_g2_i1:16-273(+)	0.055	0	27	1	1	1	1	85	9.6	9.99	0	1																Low	Not Found	Low	Low	Low	Low	Low	Low
OFAVBQ_DN224511_c1_g1_i1.p1	type:complete	(-),score=78.76,FRRS1_DANRE	High	26.233 1.35e-30,FRRS1_DANRE|28.021|2.72e-29,DOMON|PF03351.17|1.1e-17,DOMON|PF03351.17|2.5e-19,Reeler|PF02014.16|2.4e-25,Reeler|PF02014.16|3.9e+03,Cytochrom_B561|PF03188.16|7.5e-06,DUF2427|PF10348.9|3.1e+02,DUF2427|PF10348.9|0.23,YbaB_DNA_bd|PF02575.16|8.7,YbaB_DNA_bd|PF02575.16|98,DUF456|PF04306.13|0.28,DUF568|PF04526.13|8e+02,DUF568|PF04526.13|3.1,NICE-1|PF15845.5|3.4,NICE-1|PF15845.5|30 OFAVBQ_…	0.055	0	3	2	2	2	1	661	72.7	7.66	0	2																Low	Not Found	Low	Low	Low	Low	Low	Low
OFAVBQ_DN196175_c0_g1_i2.p1	type:3prime_partial	(-),score=77.21,SACS_MOUSE	High	26.042 1.01e-34,SACS_MOUSE|27.879|2.25e-10 OFAVBQ_DN196175_c0_g1_i2:1-1404(-)	0.055	0	4	2	3	2	1	468	53.3	5.2	0	2																Low	Not Found	Low	Low	Low	Low	Low	Low
OFAVBQ_DN224063_c2_g1_i8.p1	type:5prime_partial	(-),score=92.58,TM87B_MOUSE	High	47.234 9.21e-135,Lung_7-TM_R|PF06814.13|1.1e-95,GpcrRhopsn4|PF10192.9|0.093,CAML|PF14963.6|2,DUF2109|PF09882.9|7.1e+03,DUF2109|PF09882.9|1.2,DUF2109|PF09882.9|8.1e+02,ORC6|PF05460.13|3 OFAVBQ_DN224063_c2_g1_i8:2156-3574(-)	0.056	0	1	1	2	1	1	472	53.5	6.74	0	1																Low	Low	Low	Low	Low	Low	Low	Low
OFAVBQ_DN225324_c7_g1_i3.p17			High	OFAVBQ_DN225324_c7_g1~~OFAVBQ_DN225324_c7_g1_i3.p17 ORF type:complete len:95 (-),score=12.31 OFAVBQ_DN225324_c7_g1_i3:2279-2563(-)	0.056	0	7	1	1	1	1	94	10.7	11.28	0	1																Low	Low	Low	Low	Low	Low	Low	Low
OFAVBQ_DN297805_c0_g1_i1.p2	type:internal	(-),score=17.55,AB2E_ARATH	High	90.000 2.23e-51,AB2E_ARATH|42.697|1.30e-17,ABC_tran|PF00005.27|6.9e-06,SMC_N|PF02463.19|0.00017 OFAVBQ_DN297805_c0_g1_i1:1-270(-)	0.054	0	7	1	1	1	1	90	10.2	4.92	0	1																Low	Not Found	Low	Low	Low	Low	Low	Low
OFAVBQ_DN210696_c2_g1_i3.p1	type:complete	(-),score=12.53,TelA	High	PF05816.11 0.12 OFAVBQ_DN210696_c2_g1_i3:63-869(-)	0.054	0	3	1	1	1	1	268	31.9	10.9	0	1																Low	Low	Low	Low	Low	Low	Low	Low
OFAVBQ_DN212194_c2_g1_i17.p1	type:complete	(-),score=76.62,ECE1_RAT	High	29.249 1.64e-72,Peptidase_M13_N|PF05649.13|1.6e-95,DUF2225|PF09986.9|0.16,DUF2225|PF09986.9|1.7e+02,UFC1|PF08694.11|0.095 OFAVBQ_DN212194_c2_g1_i17:1839-3440(-)	0.052	0	2	1	1	1	1	533	62.1	7.14	0	1	2.427	1.608	1.453	1.002	1.038	1.196	0.804	76	184.4	122.2	110.4	76.2	78.9	90.9	61.1	Low	Low	Low	Low	Low	Low	Low	Low
OFAVBQ_DN200799_c1_g1_i2.p1	type:3prime_partial	(-),score=93.62,MATN2_HUMAN	High	34.535 4.93e-49,MATN2_HUMAN|35.404|3.46e-48,MATN2_HUMAN|33.428|1.19e-45,MATN2_HUMAN|34.333|4.98e-41,MATN2_HUMAN|30.448|4.44e-31,MATN2_HUMAN|30.769|2.00e-18,FXa_inhibition|PF14670.6|1.1e+04,FXa_inhibition|PF14670.6|1e-05,FXa_inhibition|PF14670.6|0.25,FXa_inhibition|PF14670.6|5.3e-08,FXa_inhibition|PF14670.6|1.3e-07,FXa_inhibition|PF14670.6|1.3e-06,FXa_inhibition|PF14670.6|6.4e-06,FXa_inhibition|PF…	0.055	0	2	3	5	3	1	930	102.8	7.52	0	3	0.487	0.953	1.278	1.063	1.08	1.065	0.922	101.9	49.6	97.2	130.3	108.3	110.1	108.6	94	Low	Low	Low	Low	Low	Low	Low	Low
OFAVBQ_DN197151_c2_g1_i1.p1	type:5prime_partial	(-),score=3.67,OCTB2_CHISP	High	24.336 7.06e-13,7tm_1|PF00001.21|1.3e-19,7TM_GPCR_Srv|PF10323.9|2.2e-07,DUF5527|PF17665.1|5.6e+02,DUF5527|PF17665.1|0.066,Ni_hydr_CYTB|PF01292.20|0.086,MscS_TM|PF12794.7|0.0092 OFAVBQ_DN197151_c2_g1_i1:281-871(-)	0.056	0	4	1	1	1	1	196	21.7	10.27	0	1	1.403	0.928	0.613	0.533	0.715	0.672	0.715	121.6	170.6	112.9	74.5	64.8	86.9	81.7	87	Low	Low	Low	Low	Low	Low	Low	Low
OFAVBQ_DN221513_c0_g1_i5.p1	type:complete	(-),score=92.46,GALT5_DROME	High	49.902 5.25e-171,Glycos_transf_2|PF00535.26|3.6e-31,Ricin_B_lectin|PF00652.22|1.8e-26,Glyco_tranf_2_3|PF13641.6|7.4e-09,RicinB_lectin_2|PF14200.6|2.7,RicinB_lectin_2|PF14200.6|0.038,Glyco_transf_7C|PF02709.14|5.5e-05,Glyco_tranf_2_2|PF10111.9|0.0001 OFAVBQ_DN221513_c0_g1_i5:2857-4752(-)	0.056	0	5	1	1	1	1	631	71	7.8	0	1																Low	Not Found	Low	Low	Low	Low	Low	Low
OFAVBQ_DN212350_c4_g1_i1.p1	type:complete	(+),score=8.97,ECE_LOCMI	High	28.750 1.10e-06,Peptidase_M13_N|PF05649.13|2e-10,SbcCD_C|PF13558.6|0.14 OFAVBQ_DN212350_c4_g1_i1:950-1198(+)	0.056	0	9	1	1	1	1	82	9.9	6.54	0	1																Low	Low	Low	Low	Low	Low	Low	Low
OFAVBQ_DN209495_c3_g2_i9.p1	type:complete	(-),score=156.56,ANPRA_HUMAN	High	41.267 0.0,Guanylate_cyc|PF00211.20|2.8e-66,Pkinase_Tyr|PF07714.17|5.1e-38,ANF_receptor|PF01094.28|2.6e-32,ANF_receptor|PF01094.28|5.2e+02,Pkinase|PF00069.25|1.9e+03,Pkinase|PF00069.25|1.2e-30,HNOBA|PF07701.14|0.00017,Glyco_hydro_35|PF01301.19|0.23,Glyco_hydro_35|PF01301.19|7e+03 OFAVBQ_DN209495_c3_g2_i9:519-3665(-)	0.055	0	1	1	1	1	1	1048	118.7	6.83	0	1																Low	Not Found	Low	Low	Low	Low	Low	Low
OFAVBQ_DN224358_c4_g1_i3.p1	type:complete	(-),score=505.32,CFA47_HUMAN	High	33.844 0.0,Motile_Sperm|PF00635.26|2.4e+02,Motile_Sperm|PF00635.26|0.022,Motile_Sperm|PF00635.26|1.2e+03,Motile_Sperm|PF00635.26|0.21,Motile_Sperm|PF00635.26|71,Motile_Sperm|PF00635.26|6,Motile_Sperm|PF00635.26|2.3,Motile_Sperm|PF00635.26|0.58,Motile_Sperm|PF00635.26|4.1e+02,Motile_Sperm|PF00635.26|5.5e+03,Motile_Sperm|PF00635.26|1.1e+02,ASH|PF15780.5|1.6e+03,ASH|PF15780.5|2.7e+02,ASH|PF15780.5|2…	0.055	0	1	2	2	2	1	3181	348.5	6.44	0	2																Low	Low	Low	Low	Low	Low	Low	Low
OFAVBQ_DN209567_c4_g1_i1.p2	type:5prime_partial	(+),score=9.08,INSI1_XENLA	High	58.065 2.60e-22,INSIG|PF07281.12|7e-06 OFAVBQ_DN209567_c4_g1_i1:3-242(+)	0.055	0	8	1	1	1	1	79	8.5	8.1	0	1																Low	Not Found	Low	Low	Low	Low	Low	Low
OFAVBQ_DN188452_c2_g2_i1.p1	type:3prime_partial	(+),score=12.46,rve	High	PF00665.26 0.0052,Topoisom_I_N|PF02919.15|0.072 OFAVBQ_DN188452_c2_g2_i1:17-298(+)	0.054	0	10	1	1	1	1	94	10.8	9.52	0	1																Low	Low	Low	Low	Low	Low	Low	Low
OFAVBQ_DN222439_c0_g1_i2.p1	type:complete	(-),score=256.79,COCA1_HUMAN	High	26.306 3.95e-43,COCA1_HUMAN|24.535|3.44e-37,COCA1_HUMAN|30.366|8.51e-21,COCA1_HUMAN|28.571|1.10e-19,COCA1_HUMAN|27.461|2.19e-17,COCA1_HUMAN|27.232|3.66e-17,COCA1_HUMAN|30.732|4.02e-17,COCA1_HUMAN|31.053|4.79e-17,VWA|PF00092.28|5.6e-39,VWA|PF00092.28|4e-40,VWA|PF00092.28|1.2e-34,VWA_2|PF13519.6|1.2e-13,VWA_2|PF13519.6|4.7e-13,VWA_2|PF13519.6|2e-12,F5_F8_type_C|PF00754.25|1.1e-21,fn2|PF00040.19|1.9…	0.054	0	0	1	1	1	1	1808	200.7	8.43	0	1																Low	Low	Low	Low	Low	Low	Low	Low
OFAVBQ_DN225237_c6_g1_i3.p1	type:complete	(-),score=24.96,UPF0300	High	PF08594.10 0.016 OFAVBQ_DN225237_c6_g1_i3:370-837(-)	0.054	0	6	1	2	1	1	155	18	9.2	0	1																Low	Not Found	Low	Low	Low	Low	Low	Low
OFAVBQ_DN206684_c2_g2_i4.p1	type:complete	(-),score=64.52,TM11D_HUMAN	High	32.394 6.84e-38,Trypsin|PF00089.26|1.4e-51,VWA|PF00092.28|9e-17,Sushi|PF00084.20|0.025,Sushi|PF00084.20|2.5e-09,Sushi|PF00084.20|1.3e+03,DUF1986|PF09342.11|4.8e-08,VWA_2|PF13519.6|3e-06,VWA_2|PF13519.6|1.4e+04,Trypsin_2|PF13365.6|9.3e+02,Trypsin_2|PF13365.6|0.00063 OFAVBQ_DN206684_c2_g2_i4:803-2839(-)	0.054	0	2	2	3	2	1	678	75.5	9.94	0	2																Low	Not Found	Low	Low	Low	Low	Low	Low
OFAVBQ_DN217521_c0_g2_i3.p3	type:complete	(+),score=14.69,BAG6	High	PF12057.8 0.032,FAD_syn|PF06574.12|0.094 OFAVBQ_DN217521_c0_g2_i3:942-1274(+)	0.054	0	7	1	1	1	1	110	12.6	6.62	0	1	0.643	1.206	0.718	0.891	1.213	0.932	1.096	103.9	66.8	125.3	74.6	92.6	126.1	96.8	113.9	Low	Low	Low	Low	Low	Low	Low	Low
OFAVBQ_DN210051_c0_g1_i3.p1			High	OFAVBQ_DN210051_c0_g1~~OFAVBQ_DN210051_c0_g1_i3.p1 ORF type:complete len:330 (-),score=63.13 OFAVBQ_DN210051_c0_g1_i3:602-1591(-)	0.054	0	3	1	1	1	1	329	37.8	9.09	0	1																Low	Not Found	Low	Low	Low	Low	Low	Low
OFAVBQ_DN272531_c0_g1_i1.p1	type:internal	(-),score=12.73,AKAP7_NLS	High	PF10469.9 6.5e-07,LigT_PEase|PF02834.16|0.00026,2_5_RNA_ligase2|PF13563.6|0.00037,CPDase|PF07823.11|0.13 OFAVBQ_DN272531_c0_g1_i1:2-208(-)	0.054	0	20	1	1	1	1	69	7.7	10.11	0	1																Low	Low	Low	Low	Low	Low	Low	Low
OFAVBQ_DN220147_c1_g1_i3.p8	type:complete	(+),score=2.57,BppU_N	High	PF10651.9 0.086 OFAVBQ_DN220147_c1_g1_i3:809-1027(+)	0.054	0	10	1	2	1	1	72	8.8	10.13	0	1																Not Found	Not Found	Not Found	Low	Low	Not Found	Low	Low
OFAVBQ_DN202955_c2_g1_i1.p1	type:complete	(+),score=38.00,DUF3504	High	PF12012.8 3.3e-23,Phage_integrase|PF00589.22|3.9e+02,Phage_integrase|PF00589.22|1.3e-06 OFAVBQ_DN202955_c2_g1_i1:907-1824(+)	0.054	0	3	1	1	1	1	305	34.6	9.67	0	1																Low	Not Found	Low	Low	Low	Low	Low	Low
OFAVBQ_DN212457_c0_g1_i2.p1	type:complete	(-),score=-5.65,SPON1_CHICK	High	40.000 1.36e-10,SPON1_CHICK|34.314|2.30e-07,TSP_1|PF00090.19|1.8e+04,TSP_1|PF00090.19|6.6e-07,TSP_1|PF00090.19|0.44 OFAVBQ_DN212457_c0_g1_i2:717-1136(-)	0.054	0	4	1	1	1	1	139	15.3	9.83	0	1																Low	Not Found	Low	Low	Low	Low	Low	Low
OFAVBQ_DN223131_c6_g1_i3.p3			High	OFAVBQ_DN223131_c6_g1~~OFAVBQ_DN223131_c6_g1_i3.p3 ORF type:complete len:95 (+),score=4.62 OFAVBQ_DN223131_c6_g1_i3:620-904(+)	0.054	0	13	1	1	1	1	94	10.9	9.89	0	1																Low	Not Found	Low	Low	Low	Not Found	Low	Low
[truncated: 4,744 more rows]

## Sheet: host-batch A-sequences
Master	Accession	Description	Exp. q-value: Combined	Sum PEP Score	Coverage [%]	# Peptides	# PSMs	# Unique Peptides	# Protein Groups	# AAs	MW [kDa]	calc. pI	Score Sequest HT: Sequest HT	# Peptides (by Search Engine): Sequest HT	# Razor Peptides	Abundance Ratio: B5-7	Abundance Ratio: C5-1	Abundance Ratio: B5-4	Abundance Ratio: A2-2	Abundance Ratio: A4-5	Abundance Ratio: B3-1	Abundance Ratio: C5-2	Abundances (Grouped): normalizer-A	Abundances (Grouped): B5-7	Abundances (Grouped): C5-1	Abundances (Grouped): B5-4	Abundances (Grouped): A2-2	Abundances (Grouped): A4-5	Abundances (Grouped): B3-1	Abundances (Grouped): C5-2	Found in Sample: normalizer-A	Found in Sample: B5-7	Found in Sample: C5-1	Found in Sample: B5-4	Found in Sample: A2-2	Found in Sample: A4-5	Found in Sample: B3-1	Found in Sample: C5-2	Modifications
[truncated: 19,451 more rows]

[truncated: 15 more sheets: endosymbiont-batch A, endosymbiont-batch-A-sequences, host-batch B, host-batch B-sequences, endosymbiont-batch B, endosymbiont-batch B-sequences, host-batch C, host-batch C-sequences, endosymbiont-batch C, endosymbiont-batch C-sequences, FHD(4) NN models, FHD(3) NN models, CHD NN models, Python scripts-CHD, Python scripts-FHD(3)]
